# Supplementary material for: Aneuploidy as a cause of impaired chromatin silencing and mating-type specification in budding yeast
Source: eLife. 2017 Aug 25;6:e27991. doi: 10.7554/eLife.27991 (PMC5779231; doi:10.7554/eLife.27991)
Supplement: Figure 6—source data 1. [file elife-27991-fig6-data1.xlsx]

## Sheet: Figure 6A
Gene	H3K4me3 Enrichment_D10	H3K4me3_Z-score_D10	H3K4me3 Enrichmen_WT	H3K4me3_Z-score_WT	ΔZ(H3K4me3 Enrichement Difference: Z_D10-Z_WT)	RPKM_log2(d10/wt)	Sub-Telo	Diff up	Diff down
YHL048W	11.712	-1.79131	5.63462	-2.26705	0.475744	0.754153	1	2	#N/A
YDR541C	19.6012	-1.44849	7.49197	-2.1763	0.727813	0.586603	1	#N/A	#N/A
YKR103W	79.1823	1.14056	70.1029	0.882795	0.257762	0.499015	1	#N/A	#N/A
YNR072W	8.87871	-1.91443	7.15946	-2.19255	0.278123	0.408855	1	#N/A	#N/A
YNR075W	25.1167	-1.20882	15.606	-1.77986	0.571044	0.387316	1	#N/A	#N/A
YNR074C	32.0104	-0.90926	24.3883	-1.35077	0.441509	0.370396	1	#N/A	#N/A
YCR105W	42.6172	-0.448348	44.752	-0.355822	-0.0925261	0.332643	1	#N/A	#N/A
YBL107C	42.5788	-0.450017	41.728	-0.503571	0.0535547	0.311715	1	#N/A	#N/A
YEL073C	11.8281	-1.78626	12.6955	-1.92207	0.135805	0.276217	1	#N/A	#N/A
YCR106W	21.1007	-1.38333	22.1378	-1.46072	0.0773911	0.186087	1	#N/A	#N/A
YGR295C	21.1145	-1.38273	16.7607	-1.72344	0.340711	0.167049	1	#N/A	#N/A
YER186C	61.642	0.378356	62.6994	0.521069	-0.142712	0.0694706	1	#N/A	#N/A
YKL222C	37.997	-0.649116	21.2671	-1.50327	0.854152	0.066624	1	#N/A	#N/A
YCR101C	45.1163	-0.339753	25.4875	-1.29706	0.957309	0.0650627	1	#N/A	#N/A
YPR199C	23.4246	-1.28235	18.5889	-1.63412	0.35177	0.0304288	1	#N/A	#N/A
YKL219W	20.4211	-1.41286	13.2983	-1.89261	0.479752	0.0222251	1	#N/A	#N/A
YHL047C	35.1957	-0.770845	30.4091	-1.0566	0.285753	0.00566439	1	#N/A	#N/A
YPL128C	78.4008	1.10659	70.794	0.916562	0.190032	0.00170207	1	#N/A	#N/A
YGR260W	49.7851	-0.136877	56.3397	0.210339	-0.347215	1.1835	#N/A	2	#N/A
YIL117C	26.6036	-1.14421	11.2391	-1.99322	0.849018	1.05298	#N/A	2	#N/A
YPL250C	22.2013	-1.3355	26.0372	-1.2702	-0.0653011	1.05022	#N/A	2	#N/A
YGR146C	40.2527	-0.551098	30.8276	-1.03615	0.485053	0.962056	#N/A	2	#N/A
YLR304C	42.8932	-0.436355	53.3134	0.06248	-0.498835	0.931314	#N/A	2	#N/A
YCR005C	28.6936	-1.05339	31.2446	-1.01578	-0.0376121	0.896335	#N/A	2	#N/A
YDL021W	14.8192	-1.65629	12.2341	-1.94461	0.288319	0.89361	#N/A	2	#N/A
YEL071W	72.3018	0.841569	75.0636	1.12517	-0.283601	0.889041	#N/A	2	#N/A
YNL037C	71.7953	0.819559	59.4622	0.362904	0.456655	0.817162	#N/A	2	#N/A
YOR177C	47.9106	-0.218329	43.2353	-0.429923	0.211595	0.796474	#N/A	2	#N/A
YBL005W-B	35.4868	-0.758196	21.3624	-1.49861	0.740415	0.7768	#N/A	2	#N/A
YOR071C	19.8858	-1.43612	13.9585	-1.86036	0.424234	0.772584	#N/A	2	#N/A
YOL122C	22.2508	-1.33336	20.1345	-1.55861	0.22525	0.747967	#N/A	2	#N/A
YOL152W	19.2471	-1.46388	25.0258	-1.31962	-0.144255	0.74676	#N/A	2	#N/A
YLR094C	77.0956	1.04988	70.2546	0.890209	0.15967	0.731469	#N/A	2	#N/A
YFL055W	59.6204	0.290509	56.5433	0.220288	0.0702204	0.728992	#N/A	2	#N/A
YLR266C	10.4688	-1.84533	18.2252	-1.65189	-0.193443	0.703465	#N/A	2	#N/A
YPL061W	11.5585	-1.79798	22.498	-1.44313	-0.354852	0.699826	#N/A	2	#N/A
YHL036W	25.208	-1.20485	32.6904	-0.945138	-0.259714	0.657845	#N/A	2	#N/A
YIL089W	17.0799	-1.55805	21.844	-1.47508	-0.0829693	0.657589	#N/A	2	#N/A
YNR044W	32.4109	-0.891857	47.1087	-0.240676	-0.651182	0.611965	#N/A	2	#N/A
YMR305C	39.4633	-0.585401	27.7852	-1.1848	0.599396	0.607152	#N/A	2	#N/A
YGR234W	25.7584	-1.18093	11.0603	-2.00196	0.821027	0.561691	#N/A	2	#N/A
YDR428C	34.4999	-0.801079	38.7195	-0.650563	-0.150516	0.318625	#N/A	#N/A	#N/A
YPR030W	15.5481	-1.62462	15.8527	-1.76781	0.143195	-0.466763	#N/A	#N/A	3
YEL060C	18.068	-1.51511	30.3784	-1.0581	-0.457016	-0.473775	#N/A	#N/A	3
YGL045W	12.6207	-1.75182	20.5566	-1.53798	-0.213842	-0.483837	#N/A	#N/A	3
YCL040W	27.9049	-1.08766	49.285	-0.134344	-0.953317	-0.488862	#N/A	#N/A	3
YBR132C	9.89087	-1.87044	31.8861	-0.984435	-0.886009	-0.514819	#N/A	#N/A	3
YOR386W	13.5741	-1.71039	27.3485	-1.20614	-0.504257	-0.537296	#N/A	#N/A	3
YMR250W	30.7052	-0.965975	39.3948	-0.61757	-0.348405	-0.545452	#N/A	#N/A	3
YOR385W	55.3758	0.106066	47.9409	-0.200013	0.306079	-0.573468	#N/A	#N/A	3
YOR028C	13.5914	-1.70964	17.2476	-1.69966	-0.00998483	-0.587189	#N/A	#N/A	3
YKL093W	26.349	-1.15527	35.1042	-0.827201	-0.328069	-0.623463	#N/A	#N/A	3
YCR006C	41.6298	-0.491255	31.9389	-0.981857	0.490602	-0.624048	#N/A	#N/A	3
YBL084C	67.5861	0.636654	73.2781	1.03793	-0.40128	-0.624966	#N/A	#N/A	3
YOL014W	19.8185	-1.43905	17.2701	-1.69856	0.259508	-0.641071	#N/A	#N/A	3
YML100W	17.8097	-1.52634	43.9647	-0.394288	-1.13205	-0.694794	#N/A	#N/A	3
YMR058W	28.2491	-1.0727	50.0574	-0.0966044	-0.976097	-0.706527	#N/A	#N/A	3
YGL035C	51.9168	-0.0442432	57.6715	0.27541	-0.319653	-0.713004	#N/A	#N/A	3
YBR016W	59.5846	0.288953	77.8092	1.25932	-0.970362	-0.713239	#N/A	#N/A	3
YBR005W	10.2716	-1.8539	22.0502	-1.46501	-0.388891	-0.715926	#N/A	#N/A	3
YPL274W	36.1396	-0.729829	47.4433	-0.224328	-0.505501	-0.737349	#N/A	#N/A	3
YPR138C	22.705	-1.31362	33.8577	-0.888105	-0.425513	-0.859512	#N/A	#N/A	3
YCL025C	22.7354	-1.3123	35.1833	-0.823339	-0.488957	-0.868117	#N/A	#N/A	3
YOL016C	45.2055	-0.335878	44.9587	-0.345724	0.00984583	-0.896121	#N/A	#N/A	3
YMR319C	32.8691	-0.871947	36.1213	-0.777507	-0.0944398	-1.00111	#N/A	#N/A	3
YPL273W	71.3484	0.800138	57.1279	0.248851	0.551286	-1.03136	#N/A	#N/A	3
YEL010W	19.2585	-1.46338	5.98926	-2.24972	0.786342	#DIV/0!	#N/A	#N/A	#N/A
YCR040W	23.2158	-1.29142	12.3985	-1.93658	0.645158	#DIV/0!	#N/A	#N/A	#N/A
YKL118W	57.6658	0.205574	44.1151	-0.386937	0.592511	#DIV/0!	#N/A	#N/A	#N/A
YCL046W	73.4985	0.893569	60.4573	0.411521	0.482048	#DIV/0!	#N/A	#N/A	#N/A
YDR029W	55.2687	0.101412	45.5791	-0.31541	0.416821	#DIV/0!	#N/A	#N/A	#N/A
YDR290W	69.8213	0.73378	59.1795	0.349092	0.384689	#DIV/0!	#N/A	#N/A	#N/A
YMR141W-A	105.504	2.28434	91.2076	1.91395	0.370395	#NUM!	#N/A	#N/A	#N/A
YFL012W-A	75.4826	0.979788	65.8165	0.673365	0.306423	#DIV/0!	#N/A	#N/A	#N/A
YHR125W	34.4501	-0.803243	29.9706	-1.07802	0.274781	#DIV/0!	#N/A	#N/A	#N/A
YJL182C	22.8257	-1.30837	20.1681	-1.55696	0.248591	#DIV/0!	#N/A	#N/A	#N/A
YGR242W	67.4857	0.632289	60.093	0.393722	0.238567	#DIV/0!	#N/A	#N/A	#N/A
YJR151W-A	22.8234	-1.30847	20.367	-1.54724	0.23877	#DIV/0!	#N/A	#N/A	#N/A
YGL239C	68.5231	0.677367	62.0061	0.487195	0.190173	#NUM!	#N/A	#N/A	#N/A
YMR290W-A	58.0899	0.224002	53.2874	0.0612075	0.162794	#DIV/0!	#N/A	#N/A	#N/A
YOR282W	67.0343	0.612675	62.7693	0.524483	0.0881923	#DIV/0!	#N/A	#N/A	#N/A
YDR509W	64.298	0.493773	60.4968	0.41345	0.0803222	#DIV/0!	#N/A	#N/A	#N/A
YBL012C	53.9694	0.0449505	56.7221	0.229025	-0.184074	#DIV/0!	#N/A	#N/A	#N/A
YDL185C-A	81.202	1.22832	85.3215	1.62636	-0.398039	#DIV/0!	#N/A	#N/A	#N/A
YMR135W-A	54.7752	0.0799637	61.8658	0.48034	-0.400377	#DIV/0!	#N/A	#N/A	#N/A
YBL073W	35.4253	-0.760866	44.7635	-0.35526	-0.405606	#DIV/0!	#N/A	#N/A	#N/A
YLR269C	28.4294	-1.06487	45.7001	-0.309499	-0.755369	#DIV/0!	#N/A	#N/A	#N/A
YHL005C	78.1809	1.09704	71.03	0.928091	0.168949	2.39848	#N/A	#N/A	#N/A
YGR069W	42.5155	-0.452768	47.0145	-0.245277	-0.207491	2.38163	#N/A	#N/A	#N/A
YCL023C	13.407	-1.71765	24.0158	-1.36897	-0.348684	2.28437	#N/A	#N/A	#N/A
YBR178W	59.3665	0.279476	64.5226	0.610147	-0.330672	2.02094	#N/A	#N/A	#N/A
YPL251W	64.7672	0.514157	68.7863	0.818468	-0.304311	1.82616	#N/A	#N/A	#N/A
YAL034C-B	37.0832	-0.688826	45.8408	-0.302624	-0.386201	1.79427	#N/A	#N/A	#N/A
YLR322W	67.2578	0.622387	69.6482	0.860581	-0.238194	1.76633	#N/A	#N/A	#N/A
YJL120W	58.6728	0.249332	57.8735	0.285281	-0.0359486	1.67966	#N/A	#N/A	#N/A
YDR169C-A	50.3355	-0.112959	64.7032	0.618972	-0.731931	1.52645	#N/A	#N/A	#N/A
YLR053C	12.7329	-1.74694	9.91221	-2.05805	0.311109	1.31832	#N/A	#N/A	#N/A
YDR491C	28.5951	-1.05767	32.4838	-0.955233	-0.102437	1.25211	#N/A	#N/A	#N/A
YGL041C-B	39.7767	-0.571782	37.4524	-0.712469	0.140687	1.14242	#N/A	#N/A	#N/A
YER119C-A	106.74	2.33803	107.953	2.73213	-0.394095	0.924065	#N/A	#N/A	#N/A
YEL008W	36.1308	-0.730208	30.3756	-1.05824	0.328028	0.899058	#N/A	#N/A	#N/A
YKL165C-A	14.3862	-1.6751	14.4004	-1.83876	0.163662	0.840749	#N/A	#N/A	#N/A
YLR232W	15.0017	-1.64836	17.5962	-1.68262	0.0342635	0.826509	#N/A	#N/A	#N/A
YAR047C	22.0039	-1.34408	24.4999	-1.34532	0.0012365	0.814103	#N/A	#N/A	#N/A
YBR134W	69.6491	0.726298	55.8473	0.186285	0.540013	0.808285	#N/A	#N/A	#N/A
YJR128W	13.1013	-1.73094	46.237	-0.283267	-1.44767	0.804712	#N/A	#N/A	#N/A
YKR091W	17.4447	-1.5422	19.3908	-1.59494	0.0527402	0.787463	#N/A	#N/A	#N/A
YBL065W	68.2638	0.666102	64.4384	0.606033	0.0600689	0.74677	#N/A	#N/A	#N/A
YGR064W	87.5068	1.50229	79.5799	1.34583	0.156458	0.729403	#N/A	#N/A	#N/A
YLR081W	26.7879	-1.1362	6.42706	-2.22833	1.09214	0.685486	#N/A	#N/A	#N/A
YNL103W-A	64.218	0.490295	64.2895	0.598758	-0.108463	0.671298	#N/A	#N/A	#N/A
YHL042W	31.8876	-0.914596	35.0199	-0.831319	-0.0832768	0.668011	#N/A	#N/A	#N/A
YJL127C-B	25.1525	-1.20726	22.7989	-1.42843	0.221163	0.639908	#N/A	#N/A	#N/A
YCL027W	40.4463	-0.542684	20.3079	-1.55013	1.00745	0.639571	#N/A	#N/A	#N/A
YBR292C	37.9798	-0.649863	43.529	-0.415576	-0.234288	0.638503	#N/A	#N/A	#N/A
YJR048W	15.8101	-1.61323	5.08837	-2.29374	0.680513	0.636451	#N/A	#N/A	#N/A
YJR129C	17.173	-1.55401	10.6605	-2.02149	0.467489	0.62574	#N/A	#N/A	#N/A
YDR114C	62.9374	0.434645	61.6418	0.469394	-0.0347484	0.57382	#N/A	#N/A	#N/A
YPL257W	16.722	-1.5736	11.0607	-2.00194	0.428333	0.572571	#N/A	#N/A	#N/A
YHR030C	43.7635	-0.398539	36.3721	-0.765254	0.366715	0.558246	#N/A	#N/A	#N/A
YGL039W	14.3063	-1.67857	12.167	-1.94789	0.269312	0.533804	#N/A	#N/A	#N/A
YHR071C-A	50.6466	-0.0994393	66.1937	0.691794	-0.791233	0.531671	#N/A	#N/A	#N/A
YOL159C-A	29.5358	-1.01679	19.3157	-1.59861	0.581821	0.527396	#N/A	#N/A	#N/A
YNR071C	41.2104	-0.509483	47.1559	-0.23837	-0.271112	0.523858	#N/A	#N/A	#N/A
YHR028W-A	51.7495	-0.0515142	60.175	0.39773	-0.449244	0.522194	#N/A	#N/A	#N/A
YDR077W	44.0235	-0.38724	48.5984	-0.16789	-0.21935	0.518624	#N/A	#N/A	#N/A
YER081W	39.26	-0.594235	41.6017	-0.509743	-0.0844921	0.499186	#N/A	#N/A	#N/A
YNL134C	44.0512	-0.386034	48.5609	-0.169724	-0.21631	0.493086	#N/A	#N/A	#N/A
YGR286C	43.7312	-0.39994	26.5237	-1.24643	0.846493	0.490533	#N/A	#N/A	#N/A
YKL125W	66.2452	0.578384	67.5496	0.758041	-0.179657	0.490085	#N/A	#N/A	#N/A
YGL117W	21.8759	-1.34965	31.6589	-0.995535	-0.35411	0.484725	#N/A	#N/A	#N/A
YLR042C	6.78012	-2.00562	11.0219	-2.00384	-0.00178299	0.482661	#N/A	#N/A	#N/A
YIR034C	34.6359	-0.79517	39.8438	-0.595633	-0.199538	0.47397	#N/A	#N/A	#N/A
YLR099C	52.1676	-0.0333473	51.6059	-0.020948	-0.0123993	0.471208	#N/A	#N/A	#N/A
YMR122W-A	31.7848	-0.919064	28.2446	-1.16236	0.243292	0.464002	#N/A	#N/A	#N/A
YKL163W	6.64382	-2.01154	8.77446	-2.11364	0.102101	0.461679	#N/A	#N/A	#N/A
YOL164W	22.4813	-1.32334	25.067	-1.31761	-0.00572663	0.460566	#N/A	#N/A	#N/A
YHR059W	90.0334	1.61208	68.3272	0.796034	0.816045	0.450925	#N/A	#N/A	#N/A
YDL119C	43.3328	-0.417252	55.9025	0.188978	-0.60623	0.431195	#N/A	#N/A	#N/A
YER057C	62.8115	0.429175	69.9378	0.874728	-0.445554	0.430167	#N/A	#N/A	#N/A
YDR309C	83.817	1.34195	70.0629	0.880842	0.461111	0.428421	#N/A	#N/A	#N/A
YJR154W	19.6482	-1.44645	15.4294	-1.78849	0.342041	0.428289	#N/A	#N/A	#N/A
YLR130C	39.9986	-0.562138	69.7365	0.864896	-1.42703	0.426128	#N/A	#N/A	#N/A
YGR019W	37.4541	-0.672709	51.5549	-0.0234388	-0.64927	0.425605	#N/A	#N/A	#N/A
YER092W	71.434	0.803861	74.5106	1.09815	-0.294289	0.418836	#N/A	#N/A	#N/A
YKL011C	59.5597	0.287873	51.4997	-0.0261377	0.314011	0.416864	#N/A	#N/A	#N/A
YCL047C	26.2402	-1.16	22.8805	-1.42444	0.264442	0.414677	#N/A	#N/A	#N/A
YDL127W	21.2251	-1.37792	44.1479	-0.385335	-0.992589	0.412658	#N/A	#N/A	#N/A
YPL170W	24.5607	-1.23298	21.1059	-1.51114	0.278163	0.411076	#N/A	#N/A	#N/A
YER053C-A	22.8743	-1.30626	11.8216	-1.96476	0.658503	0.409782	#N/A	#N/A	#N/A
YDR058C	13.1818	-1.72744	12.6578	-1.92391	0.196467	0.408808	#N/A	#N/A	#N/A
YIL169C	9.01151	-1.90866	10.3666	-2.03585	0.127198	0.407138	#N/A	#N/A	#N/A
YMR278W	69.377	0.714476	58.9799	0.339336	0.37514	0.406187	#N/A	#N/A	#N/A
YPL148C	35.6528	-0.750981	33.33	-0.913888	0.162907	0.401109	#N/A	#N/A	#N/A
YKL208W	47.1763	-0.250237	41.8543	-0.497397	0.24716	0.400885	#N/A	#N/A	#N/A
YLR456W	8.46413	-1.93244	7.17031	-2.19202	0.259578	0.396819	#N/A	#N/A	#N/A
YJL196C	31.5353	-0.929905	31.9048	-0.98352	0.0536147	0.395262	#N/A	#N/A	#N/A
YJL157C	29.6866	-1.01024	28.1234	-1.16828	0.158038	0.393059	#N/A	#N/A	#N/A
YPL058C	17.173	-1.554	18.2945	-1.64851	0.0945026	0.391936	#N/A	#N/A	#N/A
YGL177W	29.5515	-1.01611	45.3468	-0.326758	-0.689351	0.387046	#N/A	#N/A	#N/A
YLL025W	10.0703	-1.86265	13.3346	-1.89084	0.0281932	0.372676	#N/A	#N/A	#N/A
YLR010C	26.9387	-1.12965	16.3047	-1.74573	0.616079	0.372276	#N/A	#N/A	#N/A
YIL049W	44.7136	-0.357254	49.5498	-0.121406	-0.235848	0.371012	#N/A	#N/A	#N/A
YPL256C	37.0561	-0.690003	23.3201	-1.40296	0.712957	0.369806	#N/A	#N/A	#N/A
YEL072W	32.7035	-0.879141	34.321	-0.86547	-0.0136713	0.366722	#N/A	#N/A	#N/A
YLR256W-A	43.5148	-0.409347	22.8202	-1.42738	1.01804	0.364163	#N/A	#N/A	#N/A
YLL024C	40.2615	-0.550715	49.7049	-0.113827	-0.436888	0.362207	#N/A	#N/A	#N/A
YCR089W	37.6126	-0.665819	38.593	-0.656745	-0.00907388	0.357052	#N/A	#N/A	#N/A
YDL160C-A	18.2263	-1.50824	18.2593	-1.65022	0.141986	0.35621	#N/A	#N/A	#N/A
YGL032C	21.4844	-1.36666	20.6429	-1.53377	0.167109	0.354777	#N/A	#N/A	#N/A
YMR052W	42.4192	-0.456953	41.12	-0.533274	0.0763213	0.352382	#N/A	#N/A	#N/A
YGR243W	8.95169	-1.91126	13.6845	-1.87374	-0.0375112	0.351691	#N/A	#N/A	#N/A
YOL064C	62.3336	0.408412	47.9073	-0.201658	0.610069	0.349784	#N/A	#N/A	#N/A
YER180C-A	77.8977	1.08473	77.0915	1.22425	-0.139518	0.349139	#N/A	#N/A	#N/A
YML037C	47.3871	-0.241077	47.9961	-0.197319	-0.0437579	0.345442	#N/A	#N/A	#N/A
YJL214W	25.8381	-1.17747	25.7664	-1.28344	0.105967	0.345008	#N/A	#N/A	#N/A
YIL121W	20.2962	-1.41829	18.8992	-1.61896	0.200671	0.343883	#N/A	#N/A	#N/A
YLL032C	52.5216	-0.0179606	52.445	0.020049	-0.0380097	0.343591	#N/A	#N/A	#N/A
YGL226W	57.0604	0.179266	46.2664	-0.281829	0.461096	0.343117	#N/A	#N/A	#N/A
YPL265W	63.9365	0.47806	65.1518	0.640888	-0.162828	0.339498	#N/A	#N/A	#N/A
YOR284W	14.216	-1.6825	17.2137	-1.70131	0.0188123	0.33943	#N/A	#N/A	#N/A
YGL204C	49.491	-0.149653	34.36	-0.863564	0.71391	0.338559	#N/A	#N/A	#N/A
YJR054W	11.7368	-1.79023	5.63826	-2.26687	0.476644	0.337165	#N/A	#N/A	#N/A
YCL055W	70.1159	0.746582	62.0522	0.489447	0.257135	0.336993	#N/A	#N/A	#N/A
YMR289W	69.5846	0.723496	58.7025	0.325787	0.39771	0.334212	#N/A	#N/A	#N/A
YER133W-A	24.3407	-1.24254	28.6593	-1.14209	-0.100447	0.332424	#N/A	#N/A	#N/A
YBR068C	62.75	0.426504	56.1782	0.20245	0.224054	0.332167	#N/A	#N/A	#N/A
YPR121W	35.678	-0.749885	32.0759	-0.975162	0.225277	0.332033	#N/A	#N/A	#N/A
YER064C	66.1481	0.574165	66.8394	0.723347	-0.149182	0.330496	#N/A	#N/A	#N/A
YOR343W-B	18.6614	-1.48933	18.5945	-1.63385	0.144519	0.329911	#N/A	#N/A	#N/A
YLR349W	21.4934	-1.36627	26.9947	-1.22342	-0.142844	0.328827	#N/A	#N/A	#N/A
YDR241W	65.5947	0.550118	55.9562	0.191604	0.358514	0.327784	#N/A	#N/A	#N/A
YOL007C	13.601	-1.70922	17.9369	-1.66598	-0.0432469	0.325625	#N/A	#N/A	#N/A
YNL222W	51.575	-0.0590945	39.1662	-0.628739	0.569644	0.325559	#N/A	#N/A	#N/A
YJR009C	49.007	-0.170686	50.4978	-0.0750885	-0.0955973	0.324806	#N/A	#N/A	#N/A
YOR192C	49.0961	-0.166814	48.8947	-0.153414	-0.0134004	0.321617	#N/A	#N/A	#N/A
YMR065W	64.5807	0.506056	55.7841	0.183195	0.322861	0.319931	#N/A	#N/A	#N/A
YML027W	28.5563	-1.05935	19.8229	-1.57383	0.514477	0.318378	#N/A	#N/A	#N/A
YOL071W	58.9836	0.262839	49.1117	-0.142809	0.405648	0.317658	#N/A	#N/A	#N/A
YGL209W	55.9235	0.129863	59.7574	0.377328	-0.247465	0.316973	#N/A	#N/A	#N/A
YML126C	67.4271	0.629743	62.0733	0.490479	0.139265	0.316318	#N/A	#N/A	#N/A
YML028W	70.8299	0.77761	69.3858	0.84776	-0.0701494	0.313819	#N/A	#N/A	#N/A
YOR128C	57.5294	0.199647	50.8323	-0.0587466	0.258394	0.313622	#N/A	#N/A	#N/A
YDR354W	14.505	-1.66994	50.9628	-0.0523684	-1.61757	0.313387	#N/A	#N/A	#N/A
YER071C	18.8119	-1.48279	7.93457	-2.15468	0.671891	0.312834	#N/A	#N/A	#N/A
YDR048C	41.0187	-0.51781	42.5189	-0.464929	-0.052881	0.312828	#N/A	#N/A	#N/A
YMR199W	37.8562	-0.655235	41.651	-0.507334	-0.1479	0.312202	#N/A	#N/A	#N/A
YOR163W	54.7806	0.0802005	61.7477	0.47457	-0.39437	0.31215	#N/A	#N/A	#N/A
YGR092W	49.9299	-0.130585	59.1902	0.349611	-0.480195	0.311977	#N/A	#N/A	#N/A
YGR177C	47.7253	-0.22638	44.9738	-0.344984	0.118604	0.311809	#N/A	#N/A	#N/A
YJL158C	68.985	0.697438	67.4171	0.751571	-0.0541331	0.311667	#N/A	#N/A	#N/A
YGL162W	55.3813	0.106301	56.7064	0.228258	-0.121957	0.310421	#N/A	#N/A	#N/A
YKR027W	56.8649	0.170772	52.8375	0.0392291	0.131543	0.309104	#N/A	#N/A	#N/A
YBL029W	9.51575	-1.88674	14.3803	-1.83975	-0.0469955	0.306807	#N/A	#N/A	#N/A
YML119W	31.2525	-0.942194	28.0479	-1.17196	0.229768	0.303892	#N/A	#N/A	#N/A
YHR105W	49.1942	-0.162553	50.3876	-0.0804703	-0.0820831	0.30268	#N/A	#N/A	#N/A
YNL122C	37.3137	-0.678807	40.5173	-0.562726	-0.116081	0.302402	#N/A	#N/A	#N/A
YJL060W	54.0407	0.0480473	44.1337	-0.38603	0.434078	0.301844	#N/A	#N/A	#N/A
YMR192W	69.0465	0.700111	65.8292	0.673985	0.0261261	0.300415	#N/A	#N/A	#N/A
YKL096W-A	6.30634	-2.02621	12.0447	-1.95386	-0.0723445	0.300208	#N/A	#N/A	#N/A
YER041W	57.2725	0.188485	54.3996	0.115548	0.0729366	0.299881	#N/A	#N/A	#N/A
YLR300W	27.7439	-1.09465	24.8813	-1.32668	0.232026	0.298964	#N/A	#N/A	#N/A
YJL194W	51.6393	-0.0563002	49.9852	-0.100132	0.0438316	0.298512	#N/A	#N/A	#N/A
YDR046C	69.4186	0.716283	64.6472	0.616237	0.100046	0.295785	#N/A	#N/A	#N/A
YPL075W	35.7899	-0.745024	30.9387	-1.03072	0.285697	0.295489	#N/A	#N/A	#N/A
YKR069W	47.8523	-0.220862	48.6101	-0.167317	-0.0535452	0.292789	#N/A	#N/A	#N/A
YMR208W	65.9274	0.564577	62.5113	0.51188	0.0526968	0.289642	#N/A	#N/A	#N/A
YIL166C	11.3544	-1.80685	13.1912	-1.89784	0.0909988	0.289475	#N/A	#N/A	#N/A
YCL018W	43.0005	-0.431693	38.4907	-0.661742	0.230049	0.288921	#N/A	#N/A	#N/A
YKL104C	60.7118	0.337937	70.4945	0.90193	-0.563993	0.286589	#N/A	#N/A	#N/A
YNL024C	33.355	-0.85083	23.96	-1.37169	0.520863	0.286436	#N/A	#N/A	#N/A
YLR432W	62.1252	0.399355	53.4616	0.0697207	0.329635	0.28565	#N/A	#N/A	#N/A
YDR410C	62.7458	0.42632	70.2885	0.891862	-0.465542	0.28194	#N/A	#N/A	#N/A
YMR277W	81.1126	1.22443	72.2787	0.989102	0.235331	0.280164	#N/A	#N/A	#N/A
YCR065W	54.8802	0.0845279	44.048	-0.390219	0.474747	0.279122	#N/A	#N/A	#N/A
YNL133C	29.5559	-1.01592	27.2985	-1.20858	0.192661	0.278506	#N/A	#N/A	#N/A
YJL161W	18.0655	-1.51522	8.78484	-2.11314	0.597914	0.277455	#N/A	#N/A	#N/A
YIR009W	73.7861	0.906069	78.3557	1.28602	-0.379947	0.277371	#N/A	#N/A	#N/A
YDL059C	43.6284	-0.404409	42.7182	-0.455189	0.05078	0.275404	#N/A	#N/A	#N/A
YMR186W	59.6605	0.29225	58.0199	0.292435	-0.000185113	0.2744	#N/A	#N/A	#N/A
YKL175W	73.2159	0.88129	78.4959	1.29287	-0.411576	0.273407	#N/A	#N/A	#N/A
YOR221C	52.6205	-0.0136643	60.3662	0.407071	-0.420736	0.272975	#N/A	#N/A	#N/A
YDL055C	35.6967	-0.749074	27.2105	-1.21288	0.463805	0.272605	#N/A	#N/A	#N/A
YOL112W	57.9724	0.218898	55.5626	0.172372	0.0465268	0.272073	#N/A	#N/A	#N/A
YDR252W	54.3207	0.0602144	59.9486	0.386666	-0.326452	0.271361	#N/A	#N/A	#N/A
YGR168C	34.3218	-0.80882	26.4449	-1.25028	0.441463	0.27031	#N/A	#N/A	#N/A
YDR451C	45.5663	-0.320198	53.3079	0.0622108	-0.382409	0.269981	#N/A	#N/A	#N/A
YJL097W	61.0717	0.353573	63.0864	0.539976	-0.186403	0.269955	#N/A	#N/A	#N/A
YNL191W	30.6614	-0.96788	24.238	-1.35811	0.39023	0.26963	#N/A	#N/A	#N/A
YLR225C	28.8173	-1.04801	26.7373	-1.236	0.187987	0.265671	#N/A	#N/A	#N/A
YBR156C	30.4754	-0.975959	28.2811	-1.16057	0.184612	0.265029	#N/A	#N/A	#N/A
YBL097W	59.8524	0.300589	44.8819	-0.349474	0.650063	0.263352	#N/A	#N/A	#N/A
YBL061C	74.5553	0.939493	59.421	0.360892	0.578602	0.262793	#N/A	#N/A	#N/A
YPL102C	70.2674	0.753166	74.3264	1.08915	-0.335983	0.262674	#N/A	#N/A	#N/A
YAL065C	24.8178	-1.22181	26.0367	-1.27023	0.0484198	0.261133	#N/A	#N/A	#N/A
YGL009C	62.7765	0.427655	56.175	0.202292	0.225363	0.26041	#N/A	#N/A	#N/A
YHR174W	23.2209	-1.2912	35.7796	-0.794203	-0.496996	0.259138	#N/A	#N/A	#N/A
YNL180C	56.4746	0.153811	55.7801	0.183001	-0.0291905	0.257964	#N/A	#N/A	#N/A
YHR097C	52.689	-0.0106884	49.9246	-0.103095	0.092407	0.257505	#N/A	#N/A	#N/A
YLL004W	43.2526	-0.42074	43.5265	-0.415697	-0.00504292	0.257418	#N/A	#N/A	#N/A
YOR315W	15.9651	-1.60649	14.416	-1.838	0.23151	0.257014	#N/A	#N/A	#N/A
YLL057C	8.37801	-1.93618	7.95056	-2.1539	0.217714	0.256262	#N/A	#N/A	#N/A
YLR227C	20.3127	-1.41757	22.5389	-1.44113	0.0235553	0.255491	#N/A	#N/A	#N/A
YOR148C	30.4929	-0.975201	28.2444	-1.16237	0.187165	0.255394	#N/A	#N/A	#N/A
YIL083C	37.3172	-0.678657	42.295	-0.475869	-0.202788	0.254173	#N/A	#N/A	#N/A
YDR097C	8.48062	-1.93172	14.0254	-1.85709	-0.0746381	0.253844	#N/A	#N/A	#N/A
YFR006W	18.9437	-1.47706	16.1473	-1.75341	0.276351	0.253472	#N/A	#N/A	#N/A
YDR126W	16.3759	-1.58864	11.0489	-2.00252	0.413876	0.253436	#N/A	#N/A	#N/A
YJL051W	41.453	-0.498939	35.4028	-0.812613	0.313674	0.253217	#N/A	#N/A	#N/A
YLR376C	38.3906	-0.632015	35.8976	-0.788438	0.156423	0.252772	#N/A	#N/A	#N/A
YKL090W	54.6035	0.0725048	52.5045	0.0229561	0.0495487	0.251891	#N/A	#N/A	#N/A
YLL063C	19.9419	-1.43368	15.0496	-1.80705	0.373364	0.250666	#N/A	#N/A	#N/A
YLR093C	16.5713	-1.58015	42.7563	-0.453326	-1.12682	0.24962	#N/A	#N/A	#N/A
YPL135W	82.7271	1.29459	80.0033	1.36652	-0.0719278	0.249258	#N/A	#N/A	#N/A
YPL229W	57.2549	0.187721	63.9996	0.584594	-0.396874	0.248892	#N/A	#N/A	#N/A
YNL316C	67.8973	0.650173	60.1908	0.3985	0.251673	0.248852	#N/A	#N/A	#N/A
YHR038W	45.693	-0.314692	42.4368	-0.468937	0.154245	0.248649	#N/A	#N/A	#N/A
YER077C	37.6632	-0.663623	36.8609	-0.741371	0.0777485	0.248061	#N/A	#N/A	#N/A
YDR261C	51.3191	-0.070217	42.5334	-0.464219	0.394002	0.247298	#N/A	#N/A	#N/A
YOL077W-A	20.4549	-1.41139	21.2727	-1.50299	0.0916027	0.247096	#N/A	#N/A	#N/A
YLR355C	52.4319	-0.0218595	51.9102	-0.00608069	-0.0157789	0.246865	#N/A	#N/A	#N/A
YHR094C	26.8958	-1.13151	22.8114	-1.42781	0.296304	0.246853	#N/A	#N/A	#N/A
YPL110C	34.2484	-0.812007	20.2147	-1.55468	0.742677	0.246414	#N/A	#N/A	#N/A
YKL101W	13.6306	-1.70794	15.1857	-1.8004	0.0924594	0.246176	#N/A	#N/A	#N/A
YGL038C	58.2367	0.230383	43.2175	-0.430795	0.661178	0.244867	#N/A	#N/A	#N/A
YGR189C	16.0859	-1.60125	7.27614	-2.18685	0.585603	0.242752	#N/A	#N/A	#N/A
YDL182W	28.4457	-1.06416	28.4342	-1.15309	0.0889291	0.241999	#N/A	#N/A	#N/A
YJL151C	54.8881	0.0848703	59.3392	0.356895	-0.272024	0.241911	#N/A	#N/A	#N/A
YJL099W	53.781	0.0367627	51.7184	-0.0154491	0.0522118	0.241672	#N/A	#N/A	#N/A
YML008C	73.9373	0.912636	67.701	0.765439	0.147197	0.241083	#N/A	#N/A	#N/A
YMR299C	42.4762	-0.454477	50.6972	-0.0653465	-0.38913	0.239111	#N/A	#N/A	#N/A
YLR342W	68.84	0.691138	59.3511	0.357476	0.333662	0.238388	#N/A	#N/A	#N/A
YCR023C	63.8206	0.473026	65.0498	0.635904	-0.162878	0.238202	#N/A	#N/A	#N/A
YDL072C	81.6835	1.24924	80.1042	1.37145	-0.122209	0.237065	#N/A	#N/A	#N/A
YML116W	32.7914	-0.875322	26.2791	-1.25839	0.383063	0.236945	#N/A	#N/A	#N/A
YGL064C	34.9007	-0.783664	33.0153	-0.929262	0.145598	0.236227	#N/A	#N/A	#N/A
YGR263C	14.507	-1.66985	12.2399	-1.94433	0.274474	0.235612	#N/A	#N/A	#N/A
YHL038C	44.5945	-0.36243	43.0294	-0.439985	0.0775548	0.235248	#N/A	#N/A	#N/A
YPR116W	26.2148	-1.1611	22.9536	-1.42087	0.259764	0.234292	#N/A	#N/A	#N/A
YCR007C	21.2206	-1.37812	18.2459	-1.65088	0.272762	0.23421	#N/A	#N/A	#N/A
YER062C	27.8817	-1.08867	46.176	-0.286247	-0.802419	0.233916	#N/A	#N/A	#N/A
YBL048W	43.9118	-0.392095	45.636	-0.312632	-0.0794633	0.233841	#N/A	#N/A	#N/A
YER170W	46.017	-0.300614	43.2621	-0.428617	0.128004	0.233332	#N/A	#N/A	#N/A
YGR222W	26.3467	-1.15537	35.5235	-0.806717	-0.348652	0.233087	#N/A	#N/A	#N/A
YGL104C	7.61404	-1.96938	13.5014	-1.88269	-0.0866925	0.232937	#N/A	#N/A	#N/A
YIL070C	74.1604	0.922333	73.6611	1.05665	-0.134313	0.231441	#N/A	#N/A	#N/A
YPL152W	38.4092	-0.631204	34.8942	-0.837463	0.206259	0.231313	#N/A	#N/A	#N/A
YNL254C	22.2606	-1.33293	17.8415	-1.67064	0.337711	0.231212	#N/A	#N/A	#N/A
YIL140W	14.3565	-1.67639	14.6625	-1.82596	0.149567	0.231005	#N/A	#N/A	#N/A
YLR036C	25.8338	-1.17766	23.0134	-1.41794	0.240287	0.230633	#N/A	#N/A	#N/A
YLL039C	48.2006	-0.205726	55.1099	0.150256	-0.355982	0.230561	#N/A	#N/A	#N/A
YGR065C	40.4557	-0.542275	34.6957	-0.847161	0.304885	0.229747	#N/A	#N/A	#N/A
YGR014W	78.8255	1.12505	71.3998	0.946159	0.178891	0.229373	#N/A	#N/A	#N/A
YMR300C	52.9559	0.00091151	48.826	-0.156769	0.15768	0.229316	#N/A	#N/A	#N/A
YJL212C	62.2084	0.402968	50.5886	-0.0706501	0.473618	0.228246	#N/A	#N/A	#N/A
YCR097W	24.4522	-1.23769	20.7867	-1.52674	0.289044	0.228078	#N/A	#N/A	#N/A
YIL029C	10.7245	-1.83422	13.8143	-1.8674	0.0331794	0.227721	#N/A	#N/A	#N/A
YBR083W	38.4871	-0.627818	38.0283	-0.684335	0.0565166	0.227696	#N/A	#N/A	#N/A
YDL131W	70.5259	0.764398	61.53	0.463934	0.300464	0.227037	#N/A	#N/A	#N/A
YBR077C	60.1145	0.311979	61.6245	0.468551	-0.156572	0.226441	#N/A	#N/A	#N/A
YKL062W	24.3909	-1.24036	25.2504	-1.30865	0.0682902	0.225575	#N/A	#N/A	#N/A
YJL006C	50.0264	-0.126388	41.7312	-0.503412	0.377024	0.225125	#N/A	#N/A	#N/A
YGL067W	58.8293	0.256135	55.5645	0.172466	0.0836686	0.224511	#N/A	#N/A	#N/A
YDR139C	35.7369	-0.747328	41.9524	-0.492605	-0.254723	0.224019	#N/A	#N/A	#N/A
YNR069C	23.2652	-1.28927	13.5605	-1.8798	0.590529	0.221718	#N/A	#N/A	#N/A
YLR318W	46.0665	-0.298465	43.1286	-0.43514	0.136675	0.220596	#N/A	#N/A	#N/A
YOR298C-A	93.2308	1.75102	91.1237	1.90985	-0.158825	0.220355	#N/A	#N/A	#N/A
YOR238W	42.6063	-0.448825	32.8122	-0.939185	0.49036	0.219264	#N/A	#N/A	#N/A
YCR036W	70.4113	0.759417	62.12	0.492758	0.266659	0.218986	#N/A	#N/A	#N/A
YLL001W	66.2699	0.579457	60.8894	0.432634	0.146823	0.218433	#N/A	#N/A	#N/A
YDL107W	45.2356	-0.334568	52.4778	0.0216521	-0.35622	0.217886	#N/A	#N/A	#N/A
YNL211C	19.7725	-1.44104	12.4765	-1.93276	0.49172	0.217651	#N/A	#N/A	#N/A
YER024W	7.3839	-1.97938	15.3435	-1.79269	-0.186696	0.217645	#N/A	#N/A	#N/A
YLR452C	46.8835	-0.262961	38.5361	-0.659521	0.396561	0.217584	#N/A	#N/A	#N/A
YLR011W	11.6711	-1.79308	10.8858	-2.01049	0.217403	0.216856	#N/A	#N/A	#N/A
YOL054W	29.2374	-1.02976	26.7118	-1.23725	0.207486	0.21641	#N/A	#N/A	#N/A
YMR267W	61.963	0.392304	54.6682	0.128675	0.263629	0.216295	#N/A	#N/A	#N/A
YDL130W-A	24.4058	-1.23971	29.3477	-1.10846	-0.131249	0.215874	#N/A	#N/A	#N/A
YFL026W	35.2685	-0.767682	33.9971	-0.881293	0.113612	0.215673	#N/A	#N/A	#N/A
YPR127W	30.8773	-0.958497	27.3891	-1.20415	0.245657	0.215109	#N/A	#N/A	#N/A
YKR066C	36.7361	-0.703909	42.1726	-0.48185	-0.222059	0.215013	#N/A	#N/A	#N/A
YCL057W	74.9942	0.958563	70.6142	0.907775	0.0507884	0.21466	#N/A	#N/A	#N/A
YDL175C	67.9436	0.652189	63.8411	0.576852	0.0753367	0.212998	#N/A	#N/A	#N/A
YGR091W	39.7917	-0.571129	38.7595	-0.648607	0.0774777	0.212943	#N/A	#N/A	#N/A
YFR011C	69.6526	0.726452	56.056	0.196481	0.529971	0.212501	#N/A	#N/A	#N/A
YBR293W	33.5378	-0.842886	39.1765	-0.628232	-0.214654	0.212199	#N/A	#N/A	#N/A
YGR105W	65.1973	0.532849	61.8597	0.480042	0.0528076	0.211808	#N/A	#N/A	#N/A
YDR173C	66.7629	0.600882	59.3872	0.35924	0.241642	0.210195	#N/A	#N/A	#N/A
YDL048C	5.33669	-2.06834	22.5587	-1.44016	-0.62818	0.209877	#N/A	#N/A	#N/A
YDR499W	55.5944	0.115562	54.5355	0.122188	-0.0066256	0.209824	#N/A	#N/A	#N/A
YGR209C	51.9274	-0.0437824	47.3112	-0.23078	0.186998	0.20928	#N/A	#N/A	#N/A
YNL286W	30.2131	-0.987357	29.323	-1.10966	0.122307	0.208736	#N/A	#N/A	#N/A
YDR462W	93.7055	1.77165	84.4388	1.58323	0.188416	0.207863	#N/A	#N/A	#N/A
YOR018W	55.0529	0.0920344	44.7963	-0.353655	0.445689	0.206413	#N/A	#N/A	#N/A
YIL132C	9.16193	-1.90212	10.7651	-2.01638	0.114263	0.205823	#N/A	#N/A	#N/A
YOL059W	73.0425	0.873754	68.9844	0.828148	0.0456062	0.204968	#N/A	#N/A	#N/A
YDR004W	45.03	-0.343504	44.7447	-0.356176	0.012672	0.204897	#N/A	#N/A	#N/A
YJR055W	27.1278	-1.12143	23.7085	-1.38398	0.262552	0.20428	#N/A	#N/A	#N/A
YOL018C	59.7503	0.296154	45.0151	-0.342964	0.639118	0.203174	#N/A	#N/A	#N/A
YKL055C	26.918	-1.13055	21.2425	-1.50447	0.373923	0.202284	#N/A	#N/A	#N/A
YPR159W	76.3112	1.01579	81.1657	1.42331	-0.407518	0.202068	#N/A	#N/A	#N/A
YCR068W	31.7434	-0.920861	38.9988	-0.636914	-0.283947	0.201541	#N/A	#N/A	#N/A
YER074W-A	56.5015	0.154981	51.6745	-0.0175977	0.172578	0.201419	#N/A	#N/A	#N/A
YGL055W	20.3236	-1.4171	23.7943	-1.37979	-0.0373086	0.201045	#N/A	#N/A	#N/A
YMR256C	22.7936	-1.30977	36.2485	-0.771294	-0.538475	0.200739	#N/A	#N/A	#N/A
YGR037C	69.953	0.739503	62.5075	0.511693	0.22781	0.200527	#N/A	#N/A	#N/A
YPL096W	45.1172	-0.339713	37.4998	-0.710155	0.370442	0.200516	#N/A	#N/A	#N/A
YGR239C	16.9429	-1.564	17.7598	-1.67463	0.110625	0.200441	#N/A	#N/A	#N/A
YDL098C	32.8731	-0.871773	21.9592	-1.46945	0.597677	0.199073	#N/A	#N/A	#N/A
YER132C	52.4758	-0.0199534	47.9736	-0.198417	0.178464	0.198849	#N/A	#N/A	#N/A
YEL058W	57.9608	0.218395	55.8174	0.184822	0.0335725	0.198459	#N/A	#N/A	#N/A
YNR009W	76.2089	1.01135	70.9941	0.926337	0.0850103	0.198328	#N/A	#N/A	#N/A
YJR092W	63.0938	0.441444	61.6181	0.468238	-0.0267931	0.197516	#N/A	#N/A	#N/A
YDR109C	58.2043	0.228974	54.4945	0.120187	0.108787	0.196962	#N/A	#N/A	#N/A
YNR066C	40.9231	-0.521965	41.7809	-0.500987	-0.0209778	0.196767	#N/A	#N/A	#N/A
YKR080W	55.6767	0.119142	60.7273	0.424716	-0.305574	0.196497	#N/A	#N/A	#N/A
YMR130W	46.7914	-0.266962	49.98	-0.100385	-0.166576	0.195813	#N/A	#N/A	#N/A
YDL146W	22.4959	-1.3227	25.3669	-1.30296	-0.0197456	0.195666	#N/A	#N/A	#N/A
YBL019W	29.9564	-0.998514	31.3847	-1.00893	0.0104168	0.19501	#N/A	#N/A	#N/A
YBR180W	21.358	-1.37215	24.7556	-1.33282	-0.0393282	0.194586	#N/A	#N/A	#N/A
YNR001C	74.9737	0.957674	68.2008	0.789859	0.167815	0.194508	#N/A	#N/A	#N/A
YDR050C	63.9286	0.47772	59.3286	0.356377	0.121343	0.193258	#N/A	#N/A	#N/A
YDL030W	40.1626	-0.555012	38.5317	-0.659736	0.104724	0.193008	#N/A	#N/A	#N/A
YOR092W	62.1846	0.401934	68.7223	0.815342	-0.413408	0.192736	#N/A	#N/A	#N/A
YGL016W	61.5407	0.373957	47.4839	-0.222344	0.596301	0.192616	#N/A	#N/A	#N/A
YMR113W	65.2845	0.53664	59.5626	0.367807	0.168832	0.192543	#N/A	#N/A	#N/A
YHR018C	52.7614	-0.00754271	60.9469	0.435445	-0.442988	0.191675	#N/A	#N/A	#N/A
YKL108W	23.5308	-1.27773	28.4738	-1.15115	-0.126579	0.191496	#N/A	#N/A	#N/A
YER182W	60.51	0.329166	54.4195	0.11652	0.212647	0.191181	#N/A	#N/A	#N/A
YNR063W	21.6429	-1.35977	10.4067	-2.03389	0.674124	0.190121	#N/A	#N/A	#N/A
YER155C	96.8888	1.90997	90.7315	1.89069	0.0192872	0.189414	#N/A	#N/A	#N/A
YHR164C	50.9107	-0.0879639	59.2136	0.350758	-0.438722	0.18877	#N/A	#N/A	#N/A
YNL328C	41.5209	-0.495988	41.5767	-0.510965	0.0149773	0.188421	#N/A	#N/A	#N/A
YGR173W	74.7439	0.94769	73.8446	1.06561	-0.117919	0.188177	#N/A	#N/A	#N/A
YNL331C	15.8186	-1.61286	21.2176	-1.50568	-0.107175	0.188115	#N/A	#N/A	#N/A
YDL008W	67.3884	0.628061	64.0596	0.587525	0.0405363	0.187935	#N/A	#N/A	#N/A
YLR408C	18.4565	-1.49823	16.8332	-1.7199	0.221669	0.187155	#N/A	#N/A	#N/A
YLR023C	26.661	-1.14171	30.5504	-1.04969	-0.0920213	0.186345	#N/A	#N/A	#N/A
YOR003W	7.97093	-1.95387	13.7574	-1.87018	-0.0836926	0.186285	#N/A	#N/A	#N/A
YOL042W	64.2244	0.490572	62.6661	0.51944	-0.0288678	0.186079	#N/A	#N/A	#N/A
YGR202C	72.1135	0.833386	63.6495	0.56749	0.265896	0.185531	#N/A	#N/A	#N/A
YDR214W	60.9963	0.350296	48.5387	-0.170809	0.521106	0.185213	#N/A	#N/A	#N/A
YPR103W	93.1686	1.74832	89.6327	1.837	-0.0886804	0.184991	#N/A	#N/A	#N/A
YHR029C	14.5948	-1.66604	17.5003	-1.68731	0.0212693	0.184281	#N/A	#N/A	#N/A
YGL021W	59.2922	0.276248	57.8897	0.286073	-0.0098251	0.184278	#N/A	#N/A	#N/A
YDL065C	73.8842	0.910331	69.0616	0.831917	0.078414	0.18366	#N/A	#N/A	#N/A
YPR035W	44.3412	-0.373433	50.7054	-0.0649437	-0.30849	0.183556	#N/A	#N/A	#N/A
YDL211C	46.2045	-0.292468	53.5589	0.0744732	-0.366941	0.183541	#N/A	#N/A	#N/A
YDR533C	4.46591	-2.10618	11.6214	-1.97455	-0.131635	0.183389	#N/A	#N/A	#N/A
YPR073C	42.3709	-0.459052	40.5016	-0.563489	0.104437	0.182103	#N/A	#N/A	#N/A
YJR130C	42.9229	-0.435068	44.8163	-0.352677	-0.0823905	0.181478	#N/A	#N/A	#N/A
YML009C	25.7291	-1.18221	23.9125	-1.37402	0.191811	0.181353	#N/A	#N/A	#N/A
YOL076W	80.5029	1.19794	70.0091	0.878212	0.319729	0.180683	#N/A	#N/A	#N/A
YPR164W	50.1687	-0.120205	47.6782	-0.212849	0.0926436	0.180624	#N/A	#N/A	#N/A
YHR156C	12.3276	-1.76456	12.6524	-1.92417	0.159614	0.180408	#N/A	#N/A	#N/A
YOR155C	31.94	-0.91232	38.9387	-0.639851	-0.272469	0.179838	#N/A	#N/A	#N/A
YIL023C	69.9189	0.738021	64.2724	0.597922	0.140099	0.179426	#N/A	#N/A	#N/A
YPL077C	48.0461	-0.21244	46.8961	-0.251063	0.0386236	0.179312	#N/A	#N/A	#N/A
YCR082W	50.0095	-0.127122	49.1924	-0.13887	0.0117478	0.179043	#N/A	#N/A	#N/A
YBR281C	25.7362	-1.1819	28.0318	-1.17275	-0.00914559	0.179024	#N/A	#N/A	#N/A
YBL037W	52.452	-0.020987	53.0724	0.0507063	-0.0716932	0.179011	#N/A	#N/A	#N/A
YOR287C	27.0028	-1.12686	28.6018	-1.1449	0.018044	0.178886	#N/A	#N/A	#N/A
YJR116W	26.3422	-1.15557	23.7105	-1.38389	0.22832	0.178602	#N/A	#N/A	#N/A
YLR359W	68.1809	0.662501	65.5357	0.659649	0.0028521	0.178598	#N/A	#N/A	#N/A
YKL065C	58.572	0.244951	72.5138	1.00059	-0.755638	0.178437	#N/A	#N/A	#N/A
YCR012W	56.629	0.16052	53.874	0.0898701	0.07065	0.177815	#N/A	#N/A	#N/A
YEL030W	18.9143	-1.47834	25.881	-1.27784	-0.200501	0.177519	#N/A	#N/A	#N/A
YPR122W	65.6377	0.551986	53.5817	0.0755906	0.476395	0.177102	#N/A	#N/A	#N/A
YFL023W	44.2986	-0.375284	30.5758	-1.04845	0.67317	0.176527	#N/A	#N/A	#N/A
YDR369C	13.6688	-1.70628	9.45627	-2.08033	0.374052	0.176328	#N/A	#N/A	#N/A
YAL012W	82.7645	1.29622	83.8379	1.55387	-0.257656	0.175553	#N/A	#N/A	#N/A
YLL014W	63.6582	0.465967	44.6864	-0.359027	0.824994	0.175526	#N/A	#N/A	#N/A
YDR294C	75.4686	0.979181	62.2706	0.500116	0.479065	0.175348	#N/A	#N/A	#N/A
YIL009C-A	66.0373	0.56935	65.9373	0.679267	-0.109917	0.175212	#N/A	#N/A	#N/A
YJL057C	41.6796	-0.489093	38.315	-0.670324	0.181231	0.17472	#N/A	#N/A	#N/A
YNL041C	69.5654	0.72266	71.0639	0.929748	-0.207088	0.174488	#N/A	#N/A	#N/A
YIR033W	68.117	0.659722	55.1985	0.154583	0.50514	0.174161	#N/A	#N/A	#N/A
YDL020C	64.1278	0.486373	60.5103	0.414113	0.0722596	0.173752	#N/A	#N/A	#N/A
YPL070W	60.0617	0.309687	43.4484	-0.419513	0.7292	0.173721	#N/A	#N/A	#N/A
YGL027C	31.191	-0.944867	23.8696	-1.37611	0.431245	0.173508	#N/A	#N/A	#N/A
YIL094C	78.8168	1.12467	86.2383	1.67116	-0.546483	0.173152	#N/A	#N/A	#N/A
YML092C	100.769	2.07858	84.3783	1.58027	0.498312	0.173119	#N/A	#N/A	#N/A
YBR009C	17.9898	-1.51851	16.2458	-1.7486	0.230089	0.173016	#N/A	#N/A	#N/A
YNL115C	15.2717	-1.63662	16.0713	-1.75713	0.120502	0.172094	#N/A	#N/A	#N/A
YJR012C	45.6979	-0.314482	47.2334	-0.234583	-0.0798987	0.17203	#N/A	#N/A	#N/A
YHL008C	74.574	0.940305	67.9844	0.779287	0.161018	0.171738	#N/A	#N/A	#N/A
YOL056W	56.1301	0.138841	48.9245	-0.151958	0.290798	0.170266	#N/A	#N/A	#N/A
YJR108W	57.9957	0.219908	54.5275	0.121799	0.0981095	0.169945	#N/A	#N/A	#N/A
YLR095C	78.3195	1.10306	69.3242	0.844748	0.258313	0.169847	#N/A	#N/A	#N/A
YOL019W	38.6604	-0.620287	34.0109	-0.88062	0.260333	0.169582	#N/A	#N/A	#N/A
YNL106C	54.1454	0.0525991	39.4851	-0.613156	0.665755	0.1695	#N/A	#N/A	#N/A
YMR015C	59.0215	0.264483	50.2669	-0.0863685	0.350852	0.169332	#N/A	#N/A	#N/A
YOL033W	30.2747	-0.984683	25.5184	-1.29555	0.310869	0.169105	#N/A	#N/A	#N/A
YGR166W	56.5196	0.155766	45.3876	-0.324766	0.480532	0.169035	#N/A	#N/A	#N/A
YOL090W	37.9161	-0.65263	40.612	-0.558099	-0.094531	0.168844	#N/A	#N/A	#N/A
YLR368W	51.3639	-0.0682681	38.6336	-0.654757	0.586489	0.168655	#N/A	#N/A	#N/A
YDR332W	31.2767	-0.941139	19.2843	-1.60014	0.659003	0.168484	#N/A	#N/A	#N/A
YGL116W	35.26	-0.768051	40.3497	-0.570914	-0.197137	0.168476	#N/A	#N/A	#N/A
YBR014C	38.3376	-0.634318	53.3088	0.0622553	-0.696573	0.168392	#N/A	#N/A	#N/A
YDR217C	51.1983	-0.0754665	44.5245	-0.366936	0.29147	0.168113	#N/A	#N/A	#N/A
YFR022W	16.6885	-1.57506	20.2092	-1.55495	-0.0201034	0.167615	#N/A	#N/A	#N/A
YIL074C	52.1339	-0.0348093	46.0013	-0.294781	0.259972	0.16759	#N/A	#N/A	#N/A
YKL130C	61.3736	0.366694	80.1538	1.37387	-1.00718	0.167386	#N/A	#N/A	#N/A
YDR314C	64.1879	0.488985	56.5119	0.218756	0.270229	0.167377	#N/A	#N/A	#N/A
YJL059W	29.3401	-1.02529	23.5216	-1.39311	0.367819	0.1673	#N/A	#N/A	#N/A
YOR153W	39.2608	-0.594201	38.1394	-0.678903	0.0847019	0.167201	#N/A	#N/A	#N/A
YDR061W	54.4609	0.0663058	53.9767	0.0948893	-0.0285835	0.166996	#N/A	#N/A	#N/A
YDL232W	42.6565	-0.446644	41.9732	-0.491589	0.0449447	0.166551	#N/A	#N/A	#N/A
YBR295W	20.0146	-1.43053	21.196	-1.50674	0.0762121	0.166084	#N/A	#N/A	#N/A
YDL044C	35.9673	-0.737315	47.224	-0.235043	-0.502272	0.165526	#N/A	#N/A	#N/A
YEL048C	24.5635	-1.23286	26.7673	-1.23453	0.0016748	0.165246	#N/A	#N/A	#N/A
YPL013C	70.7831	0.775576	57.459	0.26503	0.510546	0.165086	#N/A	#N/A	#N/A
YKL197C	50.0053	-0.127307	49.0211	-0.14724	0.0199327	0.165007	#N/A	#N/A	#N/A
YGR250C	57.4707	0.197095	39.7531	-0.600061	0.797156	0.164648	#N/A	#N/A	#N/A
YNL065W	28.2947	-1.07072	60.4736	0.412321	-1.48304	0.164613	#N/A	#N/A	#N/A
YOR349W	25.8129	-1.17857	23.2467	-1.40655	0.227979	0.164567	#N/A	#N/A	#N/A
YER073W	71.9913	0.828078	63.5813	0.564156	0.263922	0.164256	#N/A	#N/A	#N/A
YNL219C	52.6143	-0.0139363	40.8501	-0.546464	0.532528	0.164076	#N/A	#N/A	#N/A
YNL078W	37.0236	-0.691416	52.3719	0.0164792	-0.707896	0.16337	#N/A	#N/A	#N/A
YGL229C	13.0707	-1.73227	10.2244	-2.0428	0.310535	0.162789	#N/A	#N/A	#N/A
YGR183C	60.5785	0.332143	59.2781	0.353906	-0.0217629	0.162745	#N/A	#N/A	#N/A
YDR128W	40.4225	-0.54372	48.1725	-0.1887	-0.35502	0.162689	#N/A	#N/A	#N/A
YDR254W	21.0252	-1.38661	11.9877	-1.95665	0.570038	0.162514	#N/A	#N/A	#N/A
YGR038W	50.8272	-0.0915893	60.4025	0.408843	-0.500433	0.162479	#N/A	#N/A	#N/A
YML050W	39.1724	-0.598042	35.6733	-0.799397	0.201355	0.162333	#N/A	#N/A	#N/A
YLR233C	6.45346	-2.01981	18.8742	-1.62018	-0.399632	0.16231	#N/A	#N/A	#N/A
YPL213W	59.043	0.26542	55.3025	0.159664	0.105756	0.162309	#N/A	#N/A	#N/A
YHR027C	83.705	1.33708	76.4898	1.19485	0.142234	0.162119	#N/A	#N/A	#N/A
YHR023W	56.6735	0.162455	56.4352	0.215005	-0.0525504	0.161802	#N/A	#N/A	#N/A
YOR184W	59.6126	0.290172	62.0312	0.488423	-0.198251	0.161553	#N/A	#N/A	#N/A
YOL088C	72.2113	0.837637	78.0447	1.27082	-0.433184	0.16131	#N/A	#N/A	#N/A
YHR181W	57.6256	0.203825	38.8286	-0.645232	0.849057	0.160947	#N/A	#N/A	#N/A
YPL051W	48.648	-0.186284	44.9999	-0.34371	0.157426	0.160421	#N/A	#N/A	#N/A
YBR053C	27.5495	-1.10311	33.6014	-0.900627	-0.202478	0.159881	#N/A	#N/A	#N/A
YOL011W	24.9708	-1.21516	29.6695	-1.09274	-0.122422	0.159478	#N/A	#N/A	#N/A
YHR001W	37.3324	-0.677996	44.0707	-0.389109	-0.288887	0.159464	#N/A	#N/A	#N/A
YKR003W	40.4743	-0.541468	38.1524	-0.678272	0.136804	0.159312	#N/A	#N/A	#N/A
YDL090C	50.9714	-0.0853267	41.1986	-0.529438	0.444111	0.159192	#N/A	#N/A	#N/A
YMR077C	36.0817	-0.732343	33.6615	-0.89769	0.165348	0.158751	#N/A	#N/A	#N/A
YGL085W	53.4715	0.0233125	49.4268	-0.127416	0.150728	0.158641	#N/A	#N/A	#N/A
YMR025W	27.63	-1.09961	24.2624	-1.35692	0.257315	0.158489	#N/A	#N/A	#N/A
YMR059W	34.5793	-0.79763	44.9537	-0.345965	-0.451665	0.15792	#N/A	#N/A	#N/A
YNL214W	47.5126	-0.235626	39.6131	-0.606904	0.371278	0.157849	#N/A	#N/A	#N/A
YIL071C	47.1028	-0.253432	45.718	-0.308625	0.0551926	0.157658	#N/A	#N/A	#N/A
YLR360W	56.1649	0.140353	54.7816	0.134215	0.00613785	0.157614	#N/A	#N/A	#N/A
YOL075C	23.5262	-1.27793	30.3376	-1.06009	-0.21784	0.157508	#N/A	#N/A	#N/A
YDR022C	17.6191	-1.53462	16.3858	-1.74176	0.207143	0.1575	#N/A	#N/A	#N/A
YLR369W	59.551	0.287496	55.6471	0.176501	0.110995	0.15747	#N/A	#N/A	#N/A
YDR056C	50.4237	-0.109125	48.3817	-0.178478	0.0693537	0.157325	#N/A	#N/A	#N/A
YOR117W	81.293	1.23227	65.8696	0.675962	0.556313	0.157194	#N/A	#N/A	#N/A
YDL101C	33.4168	-0.848144	32.8878	-0.935491	0.0873463	0.156782	#N/A	#N/A	#N/A
YKL114C	43.3555	-0.416268	50.7579	-0.0623778	-0.353891	0.156781	#N/A	#N/A	#N/A
YDR179W-A	24.8731	-1.21941	21.5711	-1.48841	0.269007	0.155834	#N/A	#N/A	#N/A
YLR302C	16.9358	-1.56431	24.3639	-1.35196	-0.21235	0.155542	#N/A	#N/A	#N/A
YPL141C	36.4271	-0.717334	34.8172	-0.841223	0.123889	0.155261	#N/A	#N/A	#N/A
YJR102C	46.8781	-0.263196	35.0522	-0.829743	0.566547	0.155211	#N/A	#N/A	#N/A
YOR226C	55.9656	0.131693	64.0495	0.587034	-0.455342	0.15485	#N/A	#N/A	#N/A
YMR294W	62.1866	0.402021	54.7212	0.131261	0.27076	0.15453	#N/A	#N/A	#N/A
YFL046W	51.7782	-0.0502679	48.6566	-0.165046	0.114778	0.154479	#N/A	#N/A	#N/A
YML041C	68.4121	0.672546	69.2641	0.841813	-0.169267	0.154228	#N/A	#N/A	#N/A
YGR161C	9.20983	-1.90004	12.9481	-1.90972	0.00968425	0.153762	#N/A	#N/A	#N/A
YDR437W	56.8318	0.169333	58.5919	0.32038	-0.151047	0.15366	#N/A	#N/A	#N/A
YGR080W	64.7876	0.515048	71.6279	0.957303	-0.442255	0.153633	#N/A	#N/A	#N/A
YJR087W	58.5546	0.244198	53.1681	0.0553777	0.18882	0.153602	#N/A	#N/A	#N/A
YKL072W	27.9816	-1.08433	14.3415	-1.84165	0.757319	0.15296	#N/A	#N/A	#N/A
YOL066C	36.7249	-0.704393	36.394	-0.764185	0.059792	0.152859	#N/A	#N/A	#N/A
YNL053W	65.8351	0.560565	64.9762	0.632309	-0.0717442	0.15272	#N/A	#N/A	#N/A
YBR229C	33.0769	-0.862917	42.4774	-0.466953	-0.395963	0.152451	#N/A	#N/A	#N/A
YIL079C	44.3832	-0.371608	41.4257	-0.518339	0.146731	0.152377	#N/A	#N/A	#N/A
YNL280C	28.5858	-1.05807	35.0389	-0.830394	-0.22768	0.151924	#N/A	#N/A	#N/A
YLR098C	57.0644	0.179443	64.3187	0.600187	-0.420744	0.151713	#N/A	#N/A	#N/A
YOR355W	23.8578	-1.26352	38.1063	-0.680522	-0.583002	0.151709	#N/A	#N/A	#N/A
YER019W	70.1072	0.746206	68.2789	0.793678	-0.0474716	0.15134	#N/A	#N/A	#N/A
YGR204W	72.5201	0.851055	68.4112	0.800141	0.0509141	0.150888	#N/A	#N/A	#N/A
YLR124W	27.3326	-1.11253	8.44241	-2.12987	1.01734	0.150221	#N/A	#N/A	#N/A
YIL002W-A	17.0639	-1.55874	13.7511	-1.87049	0.311742	0.149492	#N/A	#N/A	#N/A
YML069W	72.2912	0.841109	73.2023	1.03423	-0.193119	0.149176	#N/A	#N/A	#N/A
YDR098C	72.4677	0.848776	64.6895	0.618305	0.230471	0.149155	#N/A	#N/A	#N/A
YBR071W	35.4136	-0.761374	40.1058	-0.58283	-0.178544	0.149109	#N/A	#N/A	#N/A
YML112W	64.9823	0.523507	55.3558	0.162266	0.361241	0.148307	#N/A	#N/A	#N/A
YER075C	61.6304	0.377853	59.036	0.342081	0.0357714	0.147974	#N/A	#N/A	#N/A
YPL026C	59.0837	0.267187	56.9686	0.241068	0.0261189	0.147305	#N/A	#N/A	#N/A
YER001W	25.4943	-1.19241	17.8421	-1.67061	0.478196	0.146967	#N/A	#N/A	#N/A
YGL106W	108.808	2.42789	99.0798	2.29857	0.12932	0.146947	#N/A	#N/A	#N/A
YML016C	56.5145	0.155546	54.4944	0.120183	0.035363	0.146884	#N/A	#N/A	#N/A
YER012W	89.8175	1.6027	74.9583	1.12002	0.482673	0.146841	#N/A	#N/A	#N/A
YLR084C	32.1926	-0.901342	43.5162	-0.416202	-0.48514	0.146489	#N/A	#N/A	#N/A
YNL253W	36.7027	-0.70536	30.9736	-1.02902	0.323658	0.145831	#N/A	#N/A	#N/A
YFR036W	39.5805	-0.580307	27.5635	-1.19563	0.615323	0.145412	#N/A	#N/A	#N/A
YPL095C	20.2247	-1.4214	36.1161	-0.77776	-0.643638	0.145312	#N/A	#N/A	#N/A
YDL058W	65.1805	0.53212	59.7008	0.374562	0.157559	0.145096	#N/A	#N/A	#N/A
YLR113W	50.5434	-0.103923	51.4423	-0.0289415	-0.0749818	0.144603	#N/A	#N/A	#N/A
YMR200W	74.3928	0.932431	67.2602	0.743905	0.188525	0.144266	#N/A	#N/A	#N/A
YLR426W	52.198	-0.0320237	47.3606	-0.228368	0.196344	0.143907	#N/A	#N/A	#N/A
YOR057W	38.0535	-0.646662	31.8695	-0.985246	0.338584	0.143789	#N/A	#N/A	#N/A
YOR045W	54.7908	0.0806435	42.4025	-0.470617	0.551261	0.143623	#N/A	#N/A	#N/A
YHR112C	34.7764	-0.789067	43.569	-0.413621	-0.375446	0.14348	#N/A	#N/A	#N/A
YML056C	72.9312	0.868919	57.1139	0.248168	0.620752	0.143443	#N/A	#N/A	#N/A
YGR161W-C	13.6497	-1.70711	16.3004	-1.74593	0.0388291	0.142962	#N/A	#N/A	#N/A
YGR276C	37.7415	-0.66022	43.6197	-0.411146	-0.249075	0.142878	#N/A	#N/A	#N/A
YOL005C	56.5476	0.156985	64.8271	0.625026	-0.468041	0.141911	#N/A	#N/A	#N/A
YML097C	51.3194	-0.0702016	47.2486	-0.23384	0.163639	0.141325	#N/A	#N/A	#N/A
YPL190C	70.4848	0.762611	76.3232	1.18671	-0.4241	0.141173	#N/A	#N/A	#N/A
YPL040C	51.7442	-0.0517425	45.868	-0.301292	0.24955	0.141052	#N/A	#N/A	#N/A
YMR027W	57.1533	0.183304	57.7483	0.279162	-0.0958579	0.140586	#N/A	#N/A	#N/A
YAR018C	22.6655	-1.31533	25.4755	-1.29765	-0.0176847	0.140511	#N/A	#N/A	#N/A
YPR198W	27.2001	-1.11829	28.034	-1.17264	0.0543577	0.140415	#N/A	#N/A	#N/A
YGL108C	65.8801	0.562518	81.612	1.44512	-0.882601	0.1401	#N/A	#N/A	#N/A
YPL189C-A	30.2252	-0.986833	33.9115	-0.885476	-0.101358	0.139871	#N/A	#N/A	#N/A
YPL221W	39.3106	-0.592036	50.744	-0.0630579	-0.528978	0.139247	#N/A	#N/A	#N/A
YPL057C	37.1669	-0.685186	31.4887	-1.00385	0.318664	0.138402	#N/A	#N/A	#N/A
YFL017C	68.7635	0.687815	72.2213	0.986296	-0.29848	0.138185	#N/A	#N/A	#N/A
YOR249C	49.1856	-0.162924	40.1731	-0.579542	0.416618	0.137925	#N/A	#N/A	#N/A
YDR472W	61.4918	0.371832	62.5014	0.511394	-0.139562	0.137882	#N/A	#N/A	#N/A
YER010C	24.0112	-1.25686	23.6068	-1.38895	0.132095	0.137616	#N/A	#N/A	#N/A
YPL029W	42.7883	-0.440917	33.7773	-0.892035	0.451118	0.137117	#N/A	#N/A	#N/A
YMR008C	26.3554	-1.15499	22.6615	-1.43514	0.280148	0.136259	#N/A	#N/A	#N/A
YIL098C	47.4429	-0.238655	52.86	0.0403255	-0.27898	0.135734	#N/A	#N/A	#N/A
YDR420W	59.5846	0.288953	55.1631	0.152852	0.136102	0.134894	#N/A	#N/A	#N/A
YDR468C	83.5398	1.32991	74.6594	1.10542	0.224485	0.134178	#N/A	#N/A	#N/A
YGR084C	91.5326	1.67722	81.9892	1.46355	0.213679	0.133511	#N/A	#N/A	#N/A
YIR021W	51.4363	-0.0651242	53.5066	0.071921	-0.137045	0.133379	#N/A	#N/A	#N/A
YLR007W	25.4845	-1.19284	26.2172	-1.26141	0.0685712	0.133162	#N/A	#N/A	#N/A
YOR115C	65.9405	0.565145	57.311	0.257795	0.30735	0.13282	#N/A	#N/A	#N/A
YDR242W	10.0464	-1.86369	17.3221	-1.69601	-0.167674	0.132488	#N/A	#N/A	#N/A
YGR140W	33.5979	-0.840274	28.132	-1.16786	0.327581	0.132386	#N/A	#N/A	#N/A
YKL167C	74.4867	0.936513	64.5607	0.61201	0.324502	0.132346	#N/A	#N/A	#N/A
YDR088C	42.5643	-0.450647	41.7974	-0.500182	0.049535	0.132297	#N/A	#N/A	#N/A
YBR155W	34.4712	-0.802328	38.1601	-0.677894	-0.124434	0.132243	#N/A	#N/A	#N/A
YKR061W	22.9745	-1.30191	35.5061	-0.807567	-0.494338	0.13211	#N/A	#N/A	#N/A
YKR070W	60.9336	0.347576	60.5237	0.414764	-0.0671884	0.131998	#N/A	#N/A	#N/A
YGL048C	81.8299	1.25561	73.1001	1.02923	0.226371	0.131459	#N/A	#N/A	#N/A
YJL058C	39.2184	-0.596044	24.1747	-1.36121	0.765161	0.131147	#N/A	#N/A	#N/A
YBL035C	15.369	-1.6324	17.0715	-1.70826	0.0758643	0.130684	#N/A	#N/A	#N/A
YGR227W	66.1763	0.575388	57.1579	0.250316	0.325073	0.130099	#N/A	#N/A	#N/A
YKR074W	46.8778	-0.263208	50.5415	-0.0729538	-0.190254	0.129116	#N/A	#N/A	#N/A
YHR161C	51.0235	-0.0830593	39.6416	-0.60551	0.522451	0.129106	#N/A	#N/A	#N/A
YJL100W	47.003	-0.257767	46.8114	-0.255199	-0.00256772	0.128966	#N/A	#N/A	#N/A
YAL027W	52.6915	-0.010578	47.5817	-0.217567	0.206989	0.128834	#N/A	#N/A	#N/A
YOR371C	59.2414	0.274039	59.6623	0.37268	-0.0986412	0.128764	#N/A	#N/A	#N/A
YLR154C	9.12204	-1.90385	8.18771	-2.14231	0.238458	0.128439	#N/A	#N/A	#N/A
YNL249C	39.669	-0.576463	39.4469	-0.61502	0.0385574	0.127904	#N/A	#N/A	#N/A
YOR230W	36.9787	-0.693368	52.9364	0.0440578	-0.737426	0.127662	#N/A	#N/A	#N/A
YML070W	50.0702	-0.124488	48.1416	-0.190211	0.0657232	0.127456	#N/A	#N/A	#N/A
YNL301C	73.8934	0.91073	70.5072	0.902549	0.00818057	0.127293	#N/A	#N/A	#N/A
YBR042C	45.5533	-0.320766	49.622	-0.117878	-0.202888	0.127181	#N/A	#N/A	#N/A
YLL058W	14.2874	-1.6794	20.5161	-1.53996	-0.139436	0.126865	#N/A	#N/A	#N/A
YGR079W	52.9652	0.00131368	48.9434	-0.151035	0.152349	0.126766	#N/A	#N/A	#N/A
YDR026C	52.9849	0.00217124	65.017	0.634302	-0.63213	0.126766	#N/A	#N/A	#N/A
YGL079W	65.4426	0.543507	54.6024	0.125456	0.41805	0.126507	#N/A	#N/A	#N/A
YJR136C	45.3405	-0.33001	49.2437	-0.136362	-0.193647	0.126458	#N/A	#N/A	#N/A
YMR002W	87.8984	1.51931	87.0204	1.70936	-0.190058	0.12616	#N/A	#N/A	#N/A
YIL076W	77.8515	1.08273	64.8339	0.625356	0.457372	0.126086	#N/A	#N/A	#N/A
YOR157C	108.045	2.39475	98.9284	2.29118	0.103576	0.125551	#N/A	#N/A	#N/A
YPR120C	26.5719	-1.14558	26.9282	-1.22667	0.0810891	0.125404	#N/A	#N/A	#N/A
YHR151C	35.328	-0.765097	38.6775	-0.652613	-0.112484	0.125246	#N/A	#N/A	#N/A
YOL055C	21.1381	-1.38171	24.1665	-1.36161	-0.0200999	0.124932	#N/A	#N/A	#N/A
YPR111W	53.8864	0.0413451	48.572	-0.16918	0.210525	0.124741	#N/A	#N/A	#N/A
YGR212W	30.0767	-0.993288	38.4105	-0.665658	-0.32763	0.124606	#N/A	#N/A	#N/A
YHL014C	35.0602	-0.77673	43.6661	-0.408878	-0.367853	0.12452	#N/A	#N/A	#N/A
YDL007W	68.0386	0.656314	59.0971	0.345062	0.311251	0.124487	#N/A	#N/A	#N/A
YMR176W	25.5486	-1.19005	28.2301	-1.16306	-0.026987	0.124273	#N/A	#N/A	#N/A
YDR092W	53.3541	0.0182139	62.6309	0.517723	-0.499509	0.123851	#N/A	#N/A	#N/A
YGR180C	39.8551	-0.568375	34.5287	-0.855318	0.286943	0.123555	#N/A	#N/A	#N/A
YPL107W	47.8526	-0.22085	59.7986	0.379339	-0.60019	0.123286	#N/A	#N/A	#N/A
YML015C	69.1153	0.7031	65.8263	0.673847	0.0292533	0.122834	#N/A	#N/A	#N/A
YJR053W	45.8107	-0.309579	40.3354	-0.57161	0.262031	0.122733	#N/A	#N/A	#N/A
YMR152W	51.0087	-0.0837045	52.8353	0.0391174	-0.122822	0.122512	#N/A	#N/A	#N/A
YLR402W	64.2794	0.492963	63.3826	0.554449	-0.0614858	0.122372	#N/A	#N/A	#N/A
YBR276C	78.5781	1.1143	71.2138	0.937075	0.177227	0.122342	#N/A	#N/A	#N/A
YMR145C	32.0816	-0.906163	28.422	-1.15369	0.247524	0.1221	#N/A	#N/A	#N/A
YGR138C	15.7346	-1.61651	17.6065	-1.68212	0.0656133	0.121768	#N/A	#N/A	#N/A
YDR239C	61.0452	0.352425	43.7068	-0.40689	0.759315	0.121581	#N/A	#N/A	#N/A
YIL106W	57.0491	0.178777	61.9081	0.482407	-0.30363	0.121469	#N/A	#N/A	#N/A
YBL041W	98.8261	1.99416	92.32	1.9683	0.0258612	0.121467	#N/A	#N/A	#N/A
YDR381W	53.4793	0.023655	54.152	0.103453	-0.0797979	0.121341	#N/A	#N/A	#N/A
YCR061W	17.114	-1.55657	32.7207	-0.943658	-0.612911	0.121337	#N/A	#N/A	#N/A
YKL033W	21.3088	-1.37429	21.2423	-1.50448	0.130192	0.121022	#N/A	#N/A	#N/A
YLL027W	76.1272	1.0078	81.1222	1.42119	-0.413391	0.120449	#N/A	#N/A	#N/A
YMR009W	9.65566	-1.88066	14.3657	-1.84046	-0.0402057	0.120396	#N/A	#N/A	#N/A
YJR035W	40.5713	-0.537251	32.9623	-0.93185	0.394599	0.120229	#N/A	#N/A	#N/A
YJR142W	38.4837	-0.627969	35.4596	-0.809837	0.181869	0.120098	#N/A	#N/A	#N/A
YOR326W	83.7743	1.3401	74.2639	1.0861	0.254002	0.119927	#N/A	#N/A	#N/A
YDR394W	98.754	1.99103	89.5381	1.83238	0.158651	0.119768	#N/A	#N/A	#N/A
YNL261W	43.2288	-0.421774	46.0043	-0.294635	-0.127139	0.11957	#N/A	#N/A	#N/A
YER143W	50.3915	-0.110525	50.8537	-0.0576979	-0.0528274	0.119134	#N/A	#N/A	#N/A
YOR110W	69.7716	0.731621	66.1495	0.689639	0.0419824	0.119088	#N/A	#N/A	#N/A
YML025C	76.8981	1.0413	79.4039	1.33723	-0.295934	0.119002	#N/A	#N/A	#N/A
YGR175C	46.3669	-0.285411	65.754	0.670314	-0.955725	0.118857	#N/A	#N/A	#N/A
YMR257C	49.23	-0.160995	35.8217	-0.792144	0.63115	0.11876	#N/A	#N/A	#N/A
YML062C	68.627	0.681885	67.4638	0.753851	-0.071966	0.118736	#N/A	#N/A	#N/A
YLR032W	9.5029	-1.8873	12.0559	-1.95331	0.0660122	0.118491	#N/A	#N/A	#N/A
YGL091C	72.1554	0.835207	67.1276	0.737427	0.0977797	0.118436	#N/A	#N/A	#N/A
YGR179C	87.136	1.48618	64.6051	0.614181	0.871996	0.118323	#N/A	#N/A	#N/A
YGL098W	70.0773	0.744904	65.5447	0.660086	0.0848178	0.118323	#N/A	#N/A	#N/A
YLR256W	38.5262	-0.62612	48.7712	-0.159447	-0.466673	0.118195	#N/A	#N/A	#N/A
YMR121C	50.4025	-0.110047	61.7072	0.472589	-0.582636	0.118132	#N/A	#N/A	#N/A
YMR178W	42.6341	-0.447617	40.0232	-0.586864	0.139247	0.117958	#N/A	#N/A	#N/A
YPL242C	53.5676	0.0274909	59.103	0.345351	-0.31786	0.117892	#N/A	#N/A	#N/A
YFR034C	77.0992	1.05004	82.7064	1.49859	-0.448552	0.117861	#N/A	#N/A	#N/A
YBR081C	36.3627	-0.720135	39.7714	-0.599168	-0.120967	0.117844	#N/A	#N/A	#N/A
YLR390W-A	100.425	2.06364	98.723	2.28114	-0.217505	0.11775	#N/A	#N/A	#N/A
YMR187C	14.8431	-1.65525	19.7956	-1.57516	-0.0800847	0.117442	#N/A	#N/A	#N/A
YBR173C	89.7016	1.59766	96.5295	2.17397	-0.576308	0.117311	#N/A	#N/A	#N/A
YGL186C	59.3325	0.278	68.3133	0.795356	-0.517357	0.116898	#N/A	#N/A	#N/A
YLL041C	59.3315	0.277954	64.8129	0.624331	-0.346377	0.116877	#N/A	#N/A	#N/A
YGR155W	76.9652	1.04421	77.1649	1.22784	-0.183626	0.116846	#N/A	#N/A	#N/A
YIL067C	32.4292	-0.891062	33.1478	-0.922789	0.0317273	0.116552	#N/A	#N/A	#N/A
YBR092C	16.9705	-1.56281	18.8057	-1.62353	0.060723	0.115927	#N/A	#N/A	#N/A
YHR129C	53.0617	0.00550896	53.4113	0.0672616	-0.0617526	0.115394	#N/A	#N/A	#N/A
YLR420W	68.5752	0.679634	64.4847	0.608295	0.0713381	0.115347	#N/A	#N/A	#N/A
YLR260W	29.2974	-1.02715	20.2161	-1.55462	0.527468	0.115317	#N/A	#N/A	#N/A
YHR091C	51.9466	-0.0429496	51.1833	-0.0415928	-0.00135679	0.115183	#N/A	#N/A	#N/A
YPL125W	52.067	-0.0377188	43.1194	-0.435588	0.397869	0.115014	#N/A	#N/A	#N/A
YLR135W	31.1292	-0.947551	29.2661	-1.11244	0.164891	0.114493	#N/A	#N/A	#N/A
YAR042W	81.8703	1.25736	78.35	1.28574	-0.0283783	0.114326	#N/A	#N/A	#N/A
YGL145W	60.7844	0.341091	49.3789	-0.129758	0.470849	0.11431	#N/A	#N/A	#N/A
YHR142W	35.4906	-0.758029	40.0986	-0.583182	-0.174847	0.113637	#N/A	#N/A	#N/A
YPL065W	48.3069	-0.201109	38.8543	-0.643977	0.442868	0.113546	#N/A	#N/A	#N/A
YPL253C	59.5797	0.288743	50.0988	-0.0945827	0.383325	0.11351	#N/A	#N/A	#N/A
YNL160W	10.5833	-1.84036	11.1457	-1.99779	0.15743	0.112761	#N/A	#N/A	#N/A
YKL041W	51.7811	-0.0501423	55.992	0.193353	-0.243495	0.11273	#N/A	#N/A	#N/A
YMR104C	11.7447	-1.78989	6.97509	-2.20156	0.41167	0.111819	#N/A	#N/A	#N/A
YNL305C	50.0195	-0.12669	63.7984	0.574766	-0.701456	0.111493	#N/A	#N/A	#N/A
YLL015W	20.1882	-1.42298	20.976	-1.51749	0.0945041	0.111469	#N/A	#N/A	#N/A
YFL031W	92.2182	1.70702	88.7499	1.79387	-0.0868486	0.110908	#N/A	#N/A	#N/A
YDL216C	41.4308	-0.499905	44.1803	-0.383754	-0.116152	0.11087	#N/A	#N/A	#N/A
YGL164C	55.797	0.124367	70.4805	0.901242	-0.776876	0.110187	#N/A	#N/A	#N/A
YLR380W	80.9482	1.21729	85.1768	1.61929	-0.401999	0.11006	#N/A	#N/A	#N/A
YOL137W	49.3101	-0.157516	50.3344	-0.0830718	-0.0744444	0.109802	#N/A	#N/A	#N/A
YCL061C	42.4369	-0.456183	37.7139	-0.699695	0.243513	0.10971	#N/A	#N/A	#N/A
YKL095W	45.4966	-0.323228	50.2423	-0.0875719	-0.235656	0.109611	#N/A	#N/A	#N/A
YDR302W	41.2365	-0.508347	43.6213	-0.411065	-0.097282	0.109566	#N/A	#N/A	#N/A
YOL053W	15.8401	-1.61192	17.0803	-1.70783	0.0959035	0.109557	#N/A	#N/A	#N/A
YBR111C	65.083	0.527884	67.2202	0.741948	-0.214064	0.109453	#N/A	#N/A	#N/A
YGR196C	38.3854	-0.632238	35.7008	-0.798054	0.165816	0.109114	#N/A	#N/A	#N/A
YMR276W	104.787	2.25319	79.726	1.35297	0.900217	0.108955	#N/A	#N/A	#N/A
YJL139C	41.2882	-0.506098	39.1402	-0.630008	0.12391	0.108816	#N/A	#N/A	#N/A
YKR088C	39.1599	-0.598582	35.7128	-0.797466	0.198884	0.108539	#N/A	#N/A	#N/A
YMR106C	13.3906	-1.71837	15.8354	-1.76865	0.0502865	0.108508	#N/A	#N/A	#N/A
YLR144C	68.1812	0.662512	64.0481	0.586962	0.0755496	0.108202	#N/A	#N/A	#N/A
YPL161C	34.7584	-0.789848	38.0495	-0.683297	-0.106551	0.108078	#N/A	#N/A	#N/A
YFR010W	88.4713	1.5442	78.156	1.27626	0.267942	0.107907	#N/A	#N/A	#N/A
YGL253W	53.1966	0.0113683	54.2864	0.110017	-0.098649	0.107405	#N/A	#N/A	#N/A
YIL138C	69.7312	0.729867	66.4821	0.705888	0.0239788	0.107393	#N/A	#N/A	#N/A
YER177W	10.8165	-1.83022	7.35697	-2.1829	0.352678	0.107364	#N/A	#N/A	#N/A
YNL320W	54.7	0.0766968	49.1821	-0.139374	0.216071	0.107316	#N/A	#N/A	#N/A
YFR019W	57.5527	0.200661	53.0504	0.0496301	0.151031	0.107197	#N/A	#N/A	#N/A
YOR075W	44.9725	-0.346002	49.2795	-0.134614	-0.211388	0.107055	#N/A	#N/A	#N/A
YBR069C	56.4613	0.153233	48.9434	-0.151033	0.304267	0.106805	#N/A	#N/A	#N/A
YKR042W	26.207	-1.16144	35.2007	-0.822488	-0.338954	0.106773	#N/A	#N/A	#N/A
YBR026C	35.3271	-0.765135	52.2998	0.0129572	-0.778092	0.106761	#N/A	#N/A	#N/A
YPL270W	57.7644	0.20986	58.9281	0.336806	-0.126945	0.106669	#N/A	#N/A	#N/A
YDL013W	64.2058	0.489762	62.4481	0.508791	-0.0190285	0.106334	#N/A	#N/A	#N/A
YIL123W	15.6757	-1.61907	5.24543	-2.28607	0.666996	0.106325	#N/A	#N/A	#N/A
YNR026C	72.7363	0.86045	57.2281	0.253746	0.606704	0.106243	#N/A	#N/A	#N/A
YKL138C	86.3706	1.45291	71.6214	0.956985	0.495929	0.106151	#N/A	#N/A	#N/A
YIL139C	15.8354	-1.61213	18.1619	-1.65498	0.0428525	0.106125	#N/A	#N/A	#N/A
YPL188W	25.8016	-1.17906	35.6397	-0.80104	-0.378018	0.105929	#N/A	#N/A	#N/A
YGL060W	47.1436	-0.251661	38.8544	-0.643973	0.392312	0.105927	#N/A	#N/A	#N/A
YPR025C	47.119	-0.252728	47.3045	-0.231109	-0.0216189	0.105526	#N/A	#N/A	#N/A
YCL032W	77.3785	1.06217	60.8729	0.431826	0.630344	0.105418	#N/A	#N/A	#N/A
YGL243W	53.3329	0.0172909	45.6404	-0.312414	0.329705	0.105349	#N/A	#N/A	#N/A
YCR052W	81.9001	1.25865	72.4863	0.999244	0.259409	0.105297	#N/A	#N/A	#N/A
YKL087C	70.9744	0.78389	65.9987	0.68227	0.10162	0.104978	#N/A	#N/A	#N/A
YLR264W	81.2047	1.22844	79.4418	1.33909	-0.11065	0.104699	#N/A	#N/A	#N/A
YOR020W-A	20.7157	-1.40006	27.5842	-1.19462	-0.205438	0.104594	#N/A	#N/A	#N/A
YHR152W	56.0496	0.135346	58.6331	0.322395	-0.187049	0.104302	#N/A	#N/A	#N/A
YLR088W	73.2757	0.883887	69.115	0.83453	0.0493571	0.103858	#N/A	#N/A	#N/A
YJL091C	64.9882	0.523763	54.0954	0.100689	0.423074	0.10378	#N/A	#N/A	#N/A
YDR484W	43.4033	-0.414191	34.644	-0.849688	0.435497	0.103773	#N/A	#N/A	#N/A
YJL203W	66.2511	0.57864	62.1601	0.494721	0.0839188	0.103756	#N/A	#N/A	#N/A
YPL066W	62.7922	0.428338	50.6835	-0.0660154	0.494353	0.103713	#N/A	#N/A	#N/A
YDR284C	32.2245	-0.899957	34.8291	-0.840643	-0.0593144	0.10351	#N/A	#N/A	#N/A
YDR108W	57.8399	0.21314	53.1334	0.0536852	0.159455	0.103466	#N/A	#N/A	#N/A
YDR138W	49.4278	-0.152402	58.8485	0.332919	-0.485322	0.103197	#N/A	#N/A	#N/A
YNL135C	87.2306	1.49029	76.456	1.1932	0.297083	0.10293	#N/A	#N/A	#N/A
YMR162C	46.4808	-0.280459	41.8283	-0.498667	0.218209	0.102624	#N/A	#N/A	#N/A
YOL113W	26.2369	-1.16014	32.4123	-0.958725	-0.201416	0.101951	#N/A	#N/A	#N/A
YHR063C	45.0325	-0.343395	46.5756	-0.266721	-0.0766746	0.101839	#N/A	#N/A	#N/A
YPL225W	68.5809	0.679879	60.7829	0.427433	0.252446	0.10111	#N/A	#N/A	#N/A
YOR193W	52.8109	-0.00539282	47.9267	-0.200707	0.195314	0.100952	#N/A	#N/A	#N/A
YOR250C	73.896	0.910843	85.3839	1.62941	-0.718565	0.10081	#N/A	#N/A	#N/A
YDR155C	80.457	1.19595	78.9496	1.31504	-0.119089	0.100786	#N/A	#N/A	#N/A
YGR215W	46.2064	-0.292385	44.7881	-0.354056	0.061671	0.100721	#N/A	#N/A	#N/A
YGR100W	44.5031	-0.366401	46.6637	-0.262419	-0.103981	0.100689	#N/A	#N/A	#N/A
YBR008C	36.2643	-0.724408	37.6013	-0.705198	-0.01921	0.100243	#N/A	#N/A	#N/A
YGR029W	48.0645	-0.211644	53.0592	0.0500611	-0.261705	0.100156	#N/A	#N/A	#N/A
YKL109W	12.5532	-1.75475	17.8568	-1.66989	-0.0848648	0.0996801	#N/A	#N/A	#N/A
YML007W	78.5109	1.11138	80.8735	1.40903	-0.297653	0.0991861	#N/A	#N/A	#N/A
YLR057W	47.3705	-0.241801	50.9459	-0.0531919	-0.188609	0.0990698	#N/A	#N/A	#N/A
YOR319W	27.9161	-1.08717	30.1343	-1.07003	-0.0171477	0.098738	#N/A	#N/A	#N/A
YOR245C	46.3708	-0.285241	42.0411	-0.488272	0.203031	0.0986516	#N/A	#N/A	#N/A
YIL150C	48.465	-0.194239	49.2139	-0.137819	-0.0564202	0.098322	#N/A	#N/A	#N/A
YKL075C	46.4251	-0.282879	35.0442	-0.830131	0.547252	0.0981016	#N/A	#N/A	#N/A
YDR307W	25.9541	-1.17243	27.4861	-1.19941	0.0269825	0.0980733	#N/A	#N/A	#N/A
YER176W	47.0132	-0.257326	53.5669	0.0748648	-0.33219	0.0980313	#N/A	#N/A	#N/A
YMR220W	52.388	-0.0237693	52.7568	0.0352842	-0.0590536	0.0979894	#N/A	#N/A	#N/A
YDR510W	87.7455	1.51266	86.2488	1.67166	-0.159002	0.0979801	#N/A	#N/A	#N/A
YJL193W	52.7971	-0.0059914	53.685	0.0806367	-0.0866281	0.0976978	#N/A	#N/A	#N/A
YPL159C	52.8906	-0.001928	59.2797	0.353987	-0.355915	0.0975021	#N/A	#N/A	#N/A
YPR145W	63.7678	0.470732	67.7493	0.767803	-0.297071	0.0972984	#N/A	#N/A	#N/A
YML081C-A	22.4841	-1.32322	21.152	-1.50889	0.185677	0.0972741	#N/A	#N/A	#N/A
YBR282W	44.0375	-0.386632	41.0317	-0.537592	0.15096	0.0972472	#N/A	#N/A	#N/A
YMR067C	84.7571	1.3828	76.8347	1.21171	0.171097	0.0970221	#N/A	#N/A	#N/A
YMR311C	82.9529	1.3044	80.4892	1.39026	-0.0858556	0.0968324	#N/A	#N/A	#N/A
YNL294C	70.6516	0.769861	75.5284	1.14788	-0.378016	0.0967957	#N/A	#N/A	#N/A
YDR275W	9.70896	-1.87835	22.1898	-1.45818	-0.420166	0.0967157	#N/A	#N/A	#N/A
YML111W	72.9645	0.870366	74.6671	1.1058	-0.235433	0.0965575	#N/A	#N/A	#N/A
YHR182W	29.7403	-1.0079	30.4219	-1.05597	0.0480689	0.0964641	#N/A	#N/A	#N/A
YNL172W	28.7705	-1.05004	31.136	-1.02108	-0.0289623	0.095901	#N/A	#N/A	#N/A
YOR062C	38.7701	-0.615523	49.5851	-0.119682	-0.495841	0.0957516	#N/A	#N/A	#N/A
YBR022W	41.5957	-0.492738	35.3573	-0.814835	0.322097	0.0954927	#N/A	#N/A	#N/A
YBR151W	60.0382	0.308666	56.9734	0.241303	0.0673626	0.0953746	#N/A	#N/A	#N/A
YNL213C	69.1738	0.705643	84.1219	1.56775	-0.862107	0.0953655	#N/A	#N/A	#N/A
YBR038W	56.7634	0.166362	54.3818	0.114679	0.0516826	0.0953019	#N/A	#N/A	#N/A
YHR144C	31.1121	-0.948293	26.8401	-1.23098	0.282683	0.0952305	#N/A	#N/A	#N/A
YGL129C	65.7136	0.555286	58.0161	0.292246	0.26304	0.0951018	#N/A	#N/A	#N/A
YLR354C	74.4104	0.933197	66.5943	0.711371	0.221826	0.0950242	#N/A	#N/A	#N/A
YBR167C	69.4289	0.71673	72.4494	0.997443	-0.280713	0.0947829	#N/A	#N/A	#N/A
YNL164C	54.6954	0.0764967	46.3838	-0.276092	0.352589	0.0947453	#N/A	#N/A	#N/A
YOR047C	77.1848	1.05376	63.1639	0.543762	0.509993	0.0946903	#N/A	#N/A	#N/A
YIL151C	42.6548	-0.446716	34.6387	-0.849945	0.40323	0.0945745	#N/A	#N/A	#N/A
YGR055W	52.1291	-0.0350181	45.6256	-0.313139	0.278121	0.0943662	#N/A	#N/A	#N/A
YOR124C	64.1484	0.48727	62.3023	0.501665	-0.0143947	0.0943115	#N/A	#N/A	#N/A
YDR131C	24.324	-1.24326	25.6431	-1.28946	0.0461965	0.0943064	#N/A	#N/A	#N/A
YJR126C	75.412	0.97672	60.9931	0.437701	0.539019	0.0938789	#N/A	#N/A	#N/A
YPR109W	50.7389	-0.095428	42.9636	-0.443201	0.347773	0.0937564	#N/A	#N/A	#N/A
YGR048W	68.0238	0.655673	62.1749	0.495441	0.160232	0.0934077	#N/A	#N/A	#N/A
YGL216W	55.2516	0.100666	47.6585	-0.213812	0.314478	0.0932198	#N/A	#N/A	#N/A
YER087W	58.6263	0.247314	49.1855	-0.139205	0.386519	0.0928442	#N/A	#N/A	#N/A
YLR067C	58.6032	0.246309	50.6795	-0.0662125	0.312522	0.0922838	#N/A	#N/A	#N/A
YKL188C	11.7365	-1.79024	12.2882	-1.94196	0.151719	0.0922674	#N/A	#N/A	#N/A
YGR275W	78.2147	1.09851	79.1439	1.32453	-0.226019	0.0921532	#N/A	#N/A	#N/A
YMR023C	42.3396	-0.460413	28.0134	-1.17365	0.713235	0.0921227	#N/A	#N/A	#N/A
YOL089C	52.0519	-0.0383745	53.2533	0.0595431	-0.0979176	0.0920216	#N/A	#N/A	#N/A
YPL049C	83.3998	1.32382	67.205	0.741207	0.582617	0.09186	#N/A	#N/A	#N/A
YOR037W	62.0666	0.396808	52.1541	0.00583721	0.390971	0.0917452	#N/A	#N/A	#N/A
YDR034C	49.8905	-0.132293	50.7755	-0.0615201	-0.0707727	0.0917307	#N/A	#N/A	#N/A
YMR314W	93.2498	1.75184	80.9631	1.41341	0.338432	0.0917291	#N/A	#N/A	#N/A
YDL109C	49.6389	-0.143228	48.7829	-0.158877	0.0156486	0.0916748	#N/A	#N/A	#N/A
YNL181W	23.6308	-1.27339	28.1812	-1.16545	-0.107937	0.0914891	#N/A	#N/A	#N/A
YBR272C	63.2066	0.446345	57.3667	0.260521	0.185824	0.0913976	#N/A	#N/A	#N/A
YKL022C	72.503	0.850312	52.8987	0.0422183	0.808094	0.0913016	#N/A	#N/A	#N/A
YDR080W	60.043	0.308874	52.4845	0.0219814	0.286892	0.0912704	#N/A	#N/A	#N/A
YNL299W	23.7107	-1.26991	37.4857	-0.710844	-0.559069	0.0912222	#N/A	#N/A	#N/A
YFL034C-A	92.8244	1.73336	73.9674	1.07161	0.661753	0.0911595	#N/A	#N/A	#N/A
YNR050C	26.4608	-1.15041	43.9997	-0.392576	-0.757837	0.0910363	#N/A	#N/A	#N/A
YDL104C	33.0843	-0.862592	34.3465	-0.864222	0.00163017	0.0907808	#N/A	#N/A	#N/A
YDL215C	52.9669	0.0013895	43.7458	-0.404984	0.406374	0.0906917	#N/A	#N/A	#N/A
YPL249C	29.3527	-1.02475	32.7986	-0.93985	-0.0848988	0.0906006	#N/A	#N/A	#N/A
YIL027C	51.8474	-0.0472602	45.7142	-0.308808	0.261548	0.0903736	#N/A	#N/A	#N/A
YJL185C	9.50259	-1.88732	3.90092	-2.35176	0.464442	0.0901441	#N/A	#N/A	#N/A
YLR326W	11.8672	-1.78456	13.7117	-1.87242	0.0878535	0.0901272	#N/A	#N/A	#N/A
YIR015W	44.6646	-0.359382	36.577	-0.755242	0.39586	0.0901211	#N/A	#N/A	#N/A
YGR184C	53.6728	0.0320631	36.9276	-0.738111	0.770174	0.0900847	#N/A	#N/A	#N/A
YDR299W	49.1658	-0.163788	45.8951	-0.299972	0.136184	0.0900749	#N/A	#N/A	#N/A
YOR356W	41.7391	-0.486507	47.4863	-0.222228	-0.264278	0.0900515	#N/A	#N/A	#N/A
YJR040W	57.2034	0.18548	56.4113	0.21384	-0.0283603	0.0899964	#N/A	#N/A	#N/A
YLR362W	49.0239	-0.169951	44.7906	-0.353934	0.183983	0.0898099	#N/A	#N/A	#N/A
YNL149C	31.7335	-0.921292	35.6394	-0.801055	-0.120237	0.0895758	#N/A	#N/A	#N/A
YJR006W	44.0065	-0.387981	35.3098	-0.817158	0.429177	0.0894825	#N/A	#N/A	#N/A
YER104W	19.7492	-1.44206	31.5355	-1.00156	-0.440497	0.08947	#N/A	#N/A	#N/A
YGL224C	34.2268	-0.812945	37.0715	-0.731082	-0.0818632	0.0893479	#N/A	#N/A	#N/A
YCL004W	45.9362	-0.304126	44.1304	-0.386193	0.0820667	0.0893308	#N/A	#N/A	#N/A
YLR440C	65.327	0.538486	62.415	0.507171	0.0313141	0.0886836	#N/A	#N/A	#N/A
YGR089W	38.2861	-0.636552	42.6408	-0.458971	-0.177581	0.0886048	#N/A	#N/A	#N/A
YNL048W	73.3374	0.886569	63.6318	0.566624	0.319945	0.0880464	#N/A	#N/A	#N/A
YDR248C	19.6401	-1.4468	22.2608	-1.45471	0.007913	0.0878846	#N/A	#N/A	#N/A
YGR040W	37.1446	-0.686158	46.6384	-0.263655	-0.422503	0.0877602	#N/A	#N/A	#N/A
YNL082W	23.3795	-1.28431	21.6583	-1.48415	0.199849	0.0877581	#N/A	#N/A	#N/A
YFR016C	30.8262	-0.960716	26.8848	-1.22879	0.268078	0.087367	#N/A	#N/A	#N/A
YER183C	77.2025	1.05452	62.4727	0.509991	0.544534	0.0873488	#N/A	#N/A	#N/A
YKL067W	43.8416	-0.395144	44.5998	-0.363256	-0.0318883	0.0872599	#N/A	#N/A	#N/A
YBR115C	65.7108	0.555164	65.574	0.661517	-0.106352	0.0871624	#N/A	#N/A	#N/A
YBL022C	97.0953	1.91895	82.4223	1.48471	0.434241	0.0867543	#N/A	#N/A	#N/A
YIL009W	26.3341	-1.15592	21.7418	-1.48007	0.324156	0.0866934	#N/A	#N/A	#N/A
YMR149W	48.9812	-0.171808	55.8028	0.184106	-0.355915	0.0865196	#N/A	#N/A	#N/A
YPL072W	55.2594	0.101008	59.2493	0.352499	-0.251491	0.0864812	#N/A	#N/A	#N/A
YBR104W	43.1799	-0.423897	50.8108	-0.0597969	-0.3641	0.0864784	#N/A	#N/A	#N/A
YOR303W	43.766	-0.39843	42.5336	-0.464207	0.0657776	0.0863546	#N/A	#N/A	#N/A
YLR090W	46.0914	-0.29738	40.3799	-0.569436	0.272056	0.0863388	#N/A	#N/A	#N/A
YPL191C	19.201	-1.46588	23.8749	-1.37585	-0.0900274	0.0862068	#N/A	#N/A	#N/A
YGR042W	27.2681	-1.11533	25.1076	-1.31563	0.200296	0.0860621	#N/A	#N/A	#N/A
YKL059C	71.9178	0.824881	62.0639	0.490018	0.334864	0.0858537	#N/A	#N/A	#N/A
YEL025C	48.3775	-0.198043	40.5792	-0.559698	0.361655	0.0858214	#N/A	#N/A	#N/A
YPL196W	41.8239	-0.482821	48.2589	-0.184476	-0.298344	0.085689	#N/A	#N/A	#N/A
YML071C	46.7684	-0.267964	52.7299	0.0339689	-0.301933	0.0855444	#N/A	#N/A	#N/A
YLR223C	37.4702	-0.67201	36.6875	-0.749843	0.0778328	0.0854007	#N/A	#N/A	#N/A
YOR344C	33.648	-0.838096	45.5836	-0.315188	-0.522909	0.0852635	#N/A	#N/A	#N/A
YIL144W	76.7211	1.0336	70.1159	0.883429	0.150174	0.0851946	#N/A	#N/A	#N/A
YML068W	45.163	-0.337723	31.7305	-0.992039	0.654316	0.0850705	#N/A	#N/A	#N/A
YOL032W	44.6066	-0.361904	47.0866	-0.241753	-0.12015	0.0850174	#N/A	#N/A	#N/A
YLL002W	30.4793	-0.975791	22.2736	-1.45409	0.4783	0.0849967	#N/A	#N/A	#N/A
YNR008W	48.5972	-0.188496	54.4938	0.120151	-0.308647	0.084995	#N/A	#N/A	#N/A
YMR102C	48.4173	-0.196312	42.9315	-0.444767	0.248455	0.0848086	#N/A	#N/A	#N/A
YNL221C	52.3461	-0.0255894	63.6768	0.568824	-0.594413	0.0846772	#N/A	#N/A	#N/A
YER095W	49.0514	-0.168757	48.1171	-0.191406	0.022649	0.08433	#N/A	#N/A	#N/A
YKL007W	75.7997	0.993569	64.6423	0.615997	0.377572	0.0843044	#N/A	#N/A	#N/A
YDR439W	45.5571	-0.3206	34.5439	-0.854576	0.533977	0.0841556	#N/A	#N/A	#N/A
YKL028W	74.502	0.937175	73.4584	1.04674	-0.109567	0.0840209	#N/A	#N/A	#N/A
YML088W	52.285	-0.0282421	41.8213	-0.499011	0.470769	0.0839259	#N/A	#N/A	#N/A
YKL201C	39.2353	-0.595308	42.1721	-0.481871	-0.113437	0.0838412	#N/A	#N/A	#N/A
YJL201W	51.5219	-0.0614039	54.6342	0.127014	-0.188417	0.083761	#N/A	#N/A	#N/A
YJL189W	72.9809	0.871077	81.3346	1.43156	-0.560488	0.0836486	#N/A	#N/A	#N/A
YBR153W	40.4605	-0.542069	28.2883	-1.16022	0.618148	0.0836158	#N/A	#N/A	#N/A
YMR307W	63.8041	0.472306	57.973	0.290142	0.182165	0.0835452	#N/A	#N/A	#N/A
YLR190W	47.8202	-0.222257	47.7222	-0.210703	-0.0115546	0.0831654	#N/A	#N/A	#N/A
YHR118C	55.7349	0.121669	62.0879	0.491191	-0.369522	0.08313	#N/A	#N/A	#N/A
YNL147W	43.8883	-0.393114	39.5637	-0.609317	0.216202	0.0826975	#N/A	#N/A	#N/A
YBR253W	71.9383	0.825772	68.4984	0.804403	0.0213685	0.0826297	#N/A	#N/A	#N/A
YJL197W	63.7507	0.469986	73.9911	1.07277	-0.602784	0.0825305	#N/A	#N/A	#N/A
YPL055C	65.8148	0.55968	71.7739	0.964436	-0.404756	0.082528	#N/A	#N/A	#N/A
YDL147W	96.4636	1.8915	80.2653	1.37932	0.512178	0.0824317	#N/A	#N/A	#N/A
YKL105C	64.2802	0.492995	52.5132	0.023381	0.469614	0.0820779	#N/A	#N/A	#N/A
YBL040C	55.6922	0.119811	56.4078	0.213668	-0.0938563	0.0820426	#N/A	#N/A	#N/A
YJR044C	61.6198	0.377392	60.0113	0.389732	-0.0123399	0.0819214	#N/A	#N/A	#N/A
YKL052C	91.6759	1.68345	93.0453	2.00374	-0.320284	0.081918	#N/A	#N/A	#N/A
YNL187W	35.8076	-0.744254	45.9261	-0.298458	-0.445796	0.0818736	#N/A	#N/A	#N/A
YBR073W	36.0317	-0.734516	38.2213	-0.674904	-0.0596112	0.0818288	#N/A	#N/A	#N/A
YPL153C	6.26347	-2.02807	5.35568	-2.28068	0.252611	0.0818236	#N/A	#N/A	#N/A
YJL013C	55.6789	0.119236	67.6364	0.762285	-0.64305	0.0817106	#N/A	#N/A	#N/A
YOR375C	39.5613	-0.581142	50.4025	-0.0797464	-0.501396	0.0814805	#N/A	#N/A	#N/A
YMR087W	15.876	-1.61037	34.6738	-0.848229	-0.762137	0.0813507	#N/A	#N/A	#N/A
YGR246C	31.1752	-0.94555	37.2602	-0.721862	-0.223687	0.0813448	#N/A	#N/A	#N/A
YDL080C	63.3148	0.451047	62.3934	0.506117	-0.0550701	0.0805771	#N/A	#N/A	#N/A
YNR011C	35.6015	-0.753213	31.7718	-0.990019	0.236806	0.0805	#N/A	#N/A	#N/A
YBL026W	67.2707	0.622945	68.071	0.78352	-0.160575	0.080424	#N/A	#N/A	#N/A
YLR045C	54.8524	0.0833186	57.7812	0.280772	-0.197453	0.0803945	#N/A	#N/A	#N/A
YBL068W	57.7754	0.210339	46.0307	-0.293347	0.503686	0.080347	#N/A	#N/A	#N/A
YKL194C	32.7567	-0.87683	34.7227	-0.845841	-0.0309892	0.0800255	#N/A	#N/A	#N/A
YBR028C	60.5847	0.332412	60.5026	0.413736	-0.081324	0.0799953	#N/A	#N/A	#N/A
YGR015C	38.5603	-0.624637	30.9772	-1.02884	0.404207	0.0796823	#N/A	#N/A	#N/A
YOL086C	16.0573	-1.60249	26.5691	-1.24421	-0.358271	0.0796793	#N/A	#N/A	#N/A
YPL172C	45.9965	-0.301506	40.5257	-0.562311	0.260805	0.0796617	#N/A	#N/A	#N/A
YDR516C	22.0555	-1.34184	36.3527	-0.766199	-0.575643	0.0795974	#N/A	#N/A	#N/A
YMR179W	23.6582	-1.2722	24.8506	-1.32818	0.0559851	0.0794966	#N/A	#N/A	#N/A
YKL069W	80.0668	1.17899	61.2412	0.449824	0.729167	0.0793621	#N/A	#N/A	#N/A
YGR199W	43.7914	-0.397324	38.414	-0.66549	0.268166	0.0789047	#N/A	#N/A	#N/A
YNL199C	75.725	0.990321	78.5398	1.29501	-0.304691	0.0788204	#N/A	#N/A	#N/A
YNL220W	36.974	-0.693572	42.7914	-0.451615	-0.241957	0.0785115	#N/A	#N/A	#N/A
YOR305W	78.528	1.11212	70.1644	0.8858	0.226324	0.0784145	#N/A	#N/A	#N/A
YDR322C-A	41.7766	-0.484878	43.5731	-0.413422	-0.0714563	0.0780265	#N/A	#N/A	#N/A
YPL155C	74.8563	0.952571	75.382	1.14073	-0.188155	0.0778228	#N/A	#N/A	#N/A
YNL239W	50.3652	-0.111666	52.612	0.0282087	-0.139875	0.0775424	#N/A	#N/A	#N/A
YIL108W	65.7419	0.556514	67.717	0.766223	-0.209709	0.0775104	#N/A	#N/A	#N/A
YDL045C	48.901	-0.175292	48.2386	-0.185469	0.0101768	0.0774754	#N/A	#N/A	#N/A
YBR041W	50.9525	-0.0861467	39.133	-0.630358	0.544211	0.077248	#N/A	#N/A	#N/A
YNL123W	44.0236	-0.387237	10.7272	-2.01824	1.631	0.0768516	#N/A	#N/A	#N/A
YPL132W	62.6649	0.422805	68.5802	0.808399	-0.385593	0.0768021	#N/A	#N/A	#N/A
YOR007C	75.0704	0.961877	68.0429	0.782145	0.179733	0.0765854	#N/A	#N/A	#N/A
YAL038W	47.4083	-0.240159	51.6058	-0.0209509	-0.219208	0.0764196	#N/A	#N/A	#N/A
YJR135C	61.4117	0.368348	61.0074	0.438402	-0.0700535	0.0762855	#N/A	#N/A	#N/A
YGL244W	73.8966	0.910871	72.4092	0.995477	-0.084606	0.0762143	#N/A	#N/A	#N/A
YLR259C	70.5481	0.765365	71.9429	0.972698	-0.207333	0.0760184	#N/A	#N/A	#N/A
YOR274W	17.974	-1.5192	29.8227	-1.08525	-0.433952	0.0759323	#N/A	#N/A	#N/A
YLR277C	48.5617	-0.190038	47.7086	-0.211367	0.0213288	0.0758988	#N/A	#N/A	#N/A
YBR179C	61.6603	0.37915	59.386	0.359179	0.0199712	0.0756731	#N/A	#N/A	#N/A
YMR188C	66.6795	0.597257	59.2186	0.350998	0.246259	0.0756703	#N/A	#N/A	#N/A
YKR021W	64.0427	0.482679	63.3857	0.5546	-0.071921	0.0756558	#N/A	#N/A	#N/A
YDL149W	26.568	-1.14575	28.5682	-1.14654	0.000791469	0.0755141	#N/A	#N/A	#N/A
YMR301C	31.2563	-0.942029	28.353	-1.15706	0.215029	0.0753085	#N/A	#N/A	#N/A
YPL123C	20.8591	-1.39383	23.5123	-1.39357	-0.000260652	0.0751831	#N/A	#N/A	#N/A
YGR288W	8.47185	-1.93211	8.80179	-2.11231	0.180201	0.0751386	#N/A	#N/A	#N/A
YFR032C-A	105.733	2.29428	96.3877	2.16704	0.12724	0.0751098	#N/A	#N/A	#N/A
YFL027C	48.8351	-0.178158	56.3169	0.209227	-0.387386	0.0749676	#N/A	#N/A	#N/A
YPR135W	12.8448	-1.74208	16.3643	-1.74281	0.000728159	0.0748386	#N/A	#N/A	#N/A
YBR125C	33.6523	-0.837913	31.0705	-1.02428	0.186371	0.074455	#N/A	#N/A	#N/A
YFL018C	66.8716	0.605605	66.2822	0.696122	-0.0905178	0.0742813	#N/A	#N/A	#N/A
YOL006C	48.3424	-0.199567	47.3629	-0.228257	0.0286899	0.0741911	#N/A	#N/A	#N/A
YJL036W	58.0264	0.221242	52.5746	0.0263811	0.194861	0.0741304	#N/A	#N/A	#N/A
YJL173C	24.0262	-1.25621	27.0163	-1.22237	-0.033838	0.0741003	#N/A	#N/A	#N/A
YBL008W	48.9841	-0.17168	46.2617	-0.282059	0.110379	0.0740811	#N/A	#N/A	#N/A
YDR104C	36.3242	-0.721808	39.1725	-0.62843	-0.0933778	0.0740493	#N/A	#N/A	#N/A
YHR012W	59.8276	0.299512	51.5277	-0.0247655	0.324278	0.0739591	#N/A	#N/A	#N/A
YMR258C	49.323	-0.156956	51.6305	-0.019745	-0.137211	0.0738957	#N/A	#N/A	#N/A
YLR271W	24.8325	-1.22117	27.4794	-1.19974	-0.0214273	0.0737962	#N/A	#N/A	#N/A
YDL100C	98.5462	1.982	85.1728	1.61909	0.362906	0.0737474	#N/A	#N/A	#N/A
YNL126W	45.9284	-0.304464	36.6132	-0.753475	0.449011	0.073621	#N/A	#N/A	#N/A
YIL045W	22.0602	-1.34164	18.8943	-1.6192	0.277564	0.0736117	#N/A	#N/A	#N/A
YDR427W	78.0686	1.09216	66.7691	0.719908	0.372252	0.0733724	#N/A	#N/A	#N/A
YOR359W	84.5161	1.37233	79.7286	1.3531	0.0192347	0.0733706	#N/A	#N/A	#N/A
YDR353W	57.7849	0.210748	73.4405	1.04587	-0.835117	0.0733165	#N/A	#N/A	#N/A
YHR045W	48.8943	-0.175585	45.98	-0.295822	0.120237	0.0731495	#N/A	#N/A	#N/A
YNL003C	45.1987	-0.336171	50.2215	-0.0885882	-0.247583	0.0729786	#N/A	#N/A	#N/A
YDR100W	33.0523	-0.863986	42.7535	-0.453463	-0.410523	0.0728449	#N/A	#N/A	#N/A
YLR024C	24.5948	-1.2315	34.3639	-0.863371	-0.368126	0.072721	#N/A	#N/A	#N/A
YDL132W	62.8256	0.429789	73.1636	1.03234	-0.602547	0.0726861	#N/A	#N/A	#N/A
YKL148C	22.7029	-1.31371	37.3484	-0.717551	-0.596157	0.0726243	#N/A	#N/A	#N/A
YFR049W	55.3388	0.104456	46.6955	-0.260865	0.365321	0.0725973	#N/A	#N/A	#N/A
YDR105C	66.7468	0.60018	59.6764	0.373368	0.226813	0.0725169	#N/A	#N/A	#N/A
YLR226W	59.6576	0.292124	52.7702	0.0359401	0.256184	0.0723701	#N/A	#N/A	#N/A
YPL138C	49.3688	-0.154966	54.7655	0.133425	-0.288391	0.0723456	#N/A	#N/A	#N/A
YGR076C	69.5012	0.719873	68.0882	0.78436	-0.0644869	0.0720719	#N/A	#N/A	#N/A
YHR005C	41.6534	-0.490233	49.1376	-0.141544	-0.348689	0.0718963	#N/A	#N/A	#N/A
YDR363W-A	61.319	0.36432	68.467	0.802868	-0.438548	0.0718883	#N/A	#N/A	#N/A
YGR271W	47.0188	-0.257081	42.6795	-0.457082	0.200001	0.0718419	#N/A	#N/A	#N/A
YMR285C	55.8911	0.128458	50.6847	-0.065956	0.194414	0.0715701	#N/A	#N/A	#N/A
YKR010C	52.1617	-0.0336004	49.8797	-0.105287	0.071687	0.0713699	#N/A	#N/A	#N/A
YDR399W	40.2173	-0.552637	40.0149	-0.58727	0.0346327	0.0710147	#N/A	#N/A	#N/A
YGL231C	73.0599	0.874513	64.0841	0.588722	0.285792	0.0708958	#N/A	#N/A	#N/A
YFL042C	65.7027	0.55481	65.0126	0.634089	-0.0792799	0.0708194	#N/A	#N/A	#N/A
YDR180W	23.9948	-1.25757	20.5411	-1.53874	0.281166	0.0702726	#N/A	#N/A	#N/A
YER022W	60.5348	0.330243	59.2217	0.35115	-0.0209072	0.0702676	#N/A	#N/A	#N/A
YMR041C	24.6423	-1.22943	35.0485	-0.829922	-0.399513	0.0701173	#N/A	#N/A	#N/A
YFR048W	62.9787	0.436441	72.1657	0.983581	-0.547139	0.0701092	#N/A	#N/A	#N/A
YLR309C	39.7908	-0.571169	43.3224	-0.42567	-0.1455	0.0699606	#N/A	#N/A	#N/A
YBR176W	28.2879	-1.07102	36.8289	-0.742936	-0.32808	0.0699338	#N/A	#N/A	#N/A
YDL036C	28.4674	-1.06322	24.029	-1.36832	0.305104	0.0698562	#N/A	#N/A	#N/A
YFR043C	42.8494	-0.438259	38.1148	-0.680109	0.24185	0.0695858	#N/A	#N/A	#N/A
YBR162W-A	52.8028	-0.00574327	54.1735	0.104501	-0.110245	0.0695241	#N/A	#N/A	#N/A
YPL124W	32.877	-0.871601	27.8472	-1.18177	0.31017	0.0693353	#N/A	#N/A	#N/A
YMR100W	56.6407	0.161027	48.6472	-0.165507	0.326534	0.0692277	#N/A	#N/A	#N/A
YDR368W	36.4213	-0.717588	36.4049	-0.763649	0.0460612	0.0688819	#N/A	#N/A	#N/A
YGR056W	59.7497	0.296127	51.8669	-0.00819603	0.304323	0.0686796	#N/A	#N/A	#N/A
YDL184C	34.1642	-0.815667	27.8657	-1.18087	0.365199	0.0683729	#N/A	#N/A	#N/A
YDR495C	40.0885	-0.558232	47.6462	-0.214413	-0.343819	0.068327	#N/A	#N/A	#N/A
YOR363C	40.8654	-0.524474	45.2749	-0.330271	-0.194203	0.0677964	#N/A	#N/A	#N/A
YER159C	47.5719	-0.233049	35.6157	-0.802209	0.56916	0.0676649	#N/A	#N/A	#N/A
YIL102C-A	50.8225	-0.0917944	55.9723	0.192388	-0.284183	0.0676574	#N/A	#N/A	#N/A
YLR454W	27.5796	-1.1018	38.7186	-0.650608	-0.451188	0.067587	#N/A	#N/A	#N/A
YMR099C	66.4518	0.587362	62.1492	0.494186	0.0931764	0.0673249	#N/A	#N/A	#N/A
YAL053W	23.3843	-1.2841	25.1887	-1.31166	0.0275603	0.0672422	#N/A	#N/A	#N/A
YGL083W	42.5692	-0.450436	37.9911	-0.686151	0.235715	0.0662897	#N/A	#N/A	#N/A
YHL030W	45.2413	-0.334322	45.5746	-0.315629	-0.0186922	0.0661536	#N/A	#N/A	#N/A
YCR094W	47.7595	-0.224895	48.552	-0.170156	-0.0547387	0.0660912	#N/A	#N/A	#N/A
YIL046W	39.8089	-0.570383	45.7442	-0.307345	-0.263038	0.0660504	#N/A	#N/A	#N/A
YOR087W	46.612	-0.27476	56.0568	0.196519	-0.471279	0.0659935	#N/A	#N/A	#N/A
YAL008W	27.1871	-1.11885	37.4809	-0.71108	-0.407772	0.065987	#N/A	#N/A	#N/A
YMR211W	6.42701	-2.02096	39.9172	-0.592046	-1.42892	0.0659573	#N/A	#N/A	#N/A
YER101C	28.8035	-1.04861	25.4984	-1.29653	0.247918	0.0658415	#N/A	#N/A	#N/A
YPR020W	27.4025	-1.10949	36.4146	-0.763177	-0.346315	0.0658181	#N/A	#N/A	#N/A
YMR004W	57.6441	0.204633	54.1682	0.104242	0.100391	0.0657128	#N/A	#N/A	#N/A
YJL101C	48.9384	-0.173667	47.8434	-0.204781	0.0311141	0.0656326	#N/A	#N/A	#N/A
YNL326C	51.0301	-0.0827738	45.1347	-0.337125	0.254351	0.0656212	#N/A	#N/A	#N/A
YGR097W	42.541	-0.451663	42.304	-0.475425	0.0237623	0.0656207	#N/A	#N/A	#N/A
YBR193C	68.8289	0.690658	65.3584	0.650983	0.0396756	0.0655101	#N/A	#N/A	#N/A
YER115C	12.1491	-1.77232	10.9507	-2.00731	0.234999	0.0649934	#N/A	#N/A	#N/A
YKL189W	46.6418	-0.273462	49.0792	-0.1444	-0.129063	0.0649586	#N/A	#N/A	#N/A
YDR210W	67.3535	0.626544	65.2327	0.644844	-0.0182997	0.0648818	#N/A	#N/A	#N/A
YMR234W	47.2392	-0.247503	48.3403	-0.180501	-0.0670017	0.0648721	#N/A	#N/A	#N/A
YKL003C	65.9491	0.565516	61.9238	0.483173	0.0823426	0.0648455	#N/A	#N/A	#N/A
YGL095C	65.3849	0.540999	60.0252	0.390413	0.150586	0.0647581	#N/A	#N/A	#N/A
YPL206C	53.6559	0.0313283	58.0299	0.29292	-0.261592	0.0641163	#N/A	#N/A	#N/A
YLR164W	11.0132	-1.82167	13.133	-1.90069	0.079017	0.0640194	#N/A	#N/A	#N/A
YGL194C	66.8757	0.605785	63.4306	0.556794	0.0489905	0.0638504	#N/A	#N/A	#N/A
YNR030W	60.5547	0.331109	59.1688	0.348568	-0.0174589	0.063675	#N/A	#N/A	#N/A
YML013W	65.7921	0.558697	62.6767	0.519959	0.038738	0.0635301	#N/A	#N/A	#N/A
YLL003W	53.864	0.0403713	44.6733	-0.359664	0.400035	0.0635159	#N/A	#N/A	#N/A
YNL055C	91.5979	1.68006	92.161	1.96053	-0.280468	0.0633235	#N/A	#N/A	#N/A
YDR051C	47.6471	-0.229779	39.5561	-0.609686	0.379907	0.0631523	#N/A	#N/A	#N/A
YMR134W	12.6498	-1.75056	19.0187	-1.61312	-0.137436	0.0630997	#N/A	#N/A	#N/A
YMR047C	102.781	2.16603	88.3066	1.77221	0.393826	0.0629849	#N/A	#N/A	#N/A
YHR043C	11.3667	-1.80631	20.5731	-1.53717	-0.26914	0.0629295	#N/A	#N/A	#N/A
YOL060C	60.4783	0.327788	57.254	0.255014	0.0727738	0.062914	#N/A	#N/A	#N/A
YLR039C	63.1467	0.44374	62.2786	0.50051	-0.0567697	0.0628762	#N/A	#N/A	#N/A
YMR160W	76.8898	1.04094	83.5627	1.54042	-0.499487	0.062769	#N/A	#N/A	#N/A
YJL053W	47.0908	-0.253955	42.9323	-0.444731	0.190776	0.0627502	#N/A	#N/A	#N/A
YMR098C	69.805	0.733072	56.502	0.218273	0.514799	0.0625973	#N/A	#N/A	#N/A
YOR261C	80.5897	1.20171	82.7057	1.49855	-0.296841	0.062552	#N/A	#N/A	#N/A
YGL013C	69.2897	0.710683	69.0956	0.833581	-0.122898	0.0621739	#N/A	#N/A	#N/A
YGL247W	28.2812	-1.07131	25.6097	-1.29109	0.219786	0.0621411	#N/A	#N/A	#N/A
YMR032W	41.952	-0.477255	42.4761	-0.467018	-0.0102372	0.0621184	#N/A	#N/A	#N/A
YLR356W	13.5198	-1.71275	31.0723	-1.0242	-0.688556	0.0620324	#N/A	#N/A	#N/A
YDR089W	8.37739	-1.93621	8.40578	-2.13166	0.195446	0.061923	#N/A	#N/A	#N/A
YGR284C	74.409	0.933135	66.7404	0.718508	0.214627	0.0617934	#N/A	#N/A	#N/A
YLR180W	38.3081	-0.635599	34.5233	-0.855585	0.219986	0.0614529	#N/A	#N/A	#N/A
YHR084W	56.8851	0.171648	55.7916	0.183563	-0.0119141	0.0613174	#N/A	#N/A	#N/A
YKL210W	93.0558	1.74342	81.9102	1.45969	0.283729	0.0612576	#N/A	#N/A	#N/A
YGL062W	39.8063	-0.570494	31.371	-1.0096	0.43911	0.0611606	#N/A	#N/A	#N/A
YIL053W	79.5539	1.1567	66.718	0.717411	0.439292	0.061017	#N/A	#N/A	#N/A
YOL111C	80.5921	1.20182	84.1519	1.56922	-0.367399	0.0604973	#N/A	#N/A	#N/A
YMR094W	23.1102	-1.29601	15.0239	-1.8083	0.512291	0.0604116	#N/A	#N/A	#N/A
YGR198W	96.9477	1.91254	81.4101	1.43525	0.477282	0.0601293	#N/A	#N/A	#N/A
YLR166C	41.003	-0.518492	47.7305	-0.210293	-0.308198	0.0600685	#N/A	#N/A	#N/A
YNL241C	63.6143	0.46406	57.2046	0.252598	0.211462	0.0600168	#N/A	#N/A	#N/A
YIL125W	42.0654	-0.472328	45.4528	-0.321582	-0.150746	0.059925	#N/A	#N/A	#N/A
YMR061W	78.9649	1.13111	75.194	1.13154	-0.00043081	0.0597724	#N/A	#N/A	#N/A
YLR459W	74.25	0.926226	62.1269	0.493098	0.433128	0.0594393	#N/A	#N/A	#N/A
YHR109W	38.3423	-0.634113	36.7619	-0.746209	0.112096	0.0592611	#N/A	#N/A	#N/A
YOR069W	68.5003	0.676376	60.198	0.398851	0.277525	0.0590251	#N/A	#N/A	#N/A
YBR105C	44.3926	-0.371201	57.5743	0.270664	-0.641865	0.0589581	#N/A	#N/A	#N/A
YJL112W	66.0412	0.569519	68.451	0.802083	-0.232564	0.0589496	#N/A	#N/A	#N/A
YHR201C	71.9459	0.826103	69.0295	0.830351	-0.00424855	0.058823	#N/A	#N/A	#N/A
YDR349C	51.815	-0.0486688	52.7927	0.0370387	-0.0857075	0.0585296	#N/A	#N/A	#N/A
YOL038W	108.949	2.43402	106.522	2.66217	-0.228146	0.0585039	#N/A	#N/A	#N/A
YBR023C	55.6124	0.116346	47.4919	-0.221951	0.338297	0.0583772	#N/A	#N/A	#N/A
YPR068C	17.0972	-1.5573	16.886	-1.71732	0.160027	0.0583283	#N/A	#N/A	#N/A
YGL151W	64.2969	0.493721	52.4916	0.0223283	0.471393	0.0581767	#N/A	#N/A	#N/A
YPL268W	51.2246	-0.0743243	48.8515	-0.155523	0.0811983	0.057986	#N/A	#N/A	#N/A
YDR386W	31.6885	-0.923247	28.8295	-1.13378	0.210528	0.057907	#N/A	#N/A	#N/A
YBR196C	88.3342	1.53824	82.3825	1.48276	0.0554825	0.0578882	#N/A	#N/A	#N/A
YPR178W	68.9983	0.698019	65.5325	0.659493	0.0385261	0.0578669	#N/A	#N/A	#N/A
YFR047C	53.2964	0.0157076	54.4052	0.115824	-0.100116	0.0577355	#N/A	#N/A	#N/A
YDR132C	22.2675	-1.33263	17.8371	-1.67085	0.338226	0.0577255	#N/A	#N/A	#N/A
YFR050C	99.3727	2.01791	93.8599	2.04354	-0.0256258	0.0576249	#N/A	#N/A	#N/A
YGL114W	48.8177	-0.178911	51.118	-0.0447845	-0.134127	0.0576172	#N/A	#N/A	#N/A
YLR336C	25.2592	-1.20263	26.5527	-1.24502	0.0423919	0.0575698	#N/A	#N/A	#N/A
YGL232W	57.1303	0.182305	46.6728	-0.261971	0.444276	0.057494	#N/A	#N/A	#N/A
YPL262W	63.7558	0.470209	65.3101	0.648623	-0.178415	0.0574205	#N/A	#N/A	#N/A
YBR137W	36.4368	-0.716914	40.1668	-0.579851	-0.137063	0.0574177	#N/A	#N/A	#N/A
YGR163W	56.0508	0.135394	51.8499	-0.00902443	0.144418	0.0572408	#N/A	#N/A	#N/A
YGL221C	91.0494	1.65623	81.9341	1.46085	0.195379	0.0571702	#N/A	#N/A	#N/A
YAR007C	46.0621	-0.298656	52.7787	0.0363535	-0.335009	0.0570906	#N/A	#N/A	#N/A
YGR032W	37.2111	-0.683269	44.7352	-0.356642	-0.326628	0.0569962	#N/A	#N/A	#N/A
YLR109W	55.2463	0.100438	54.0778	0.099826	0.000612158	0.0569478	#N/A	#N/A	#N/A
YDR490C	25.1401	-1.2078	41.8277	-0.498701	-0.709101	0.0569461	#N/A	#N/A	#N/A
YER100W	77.6608	1.07444	69.1497	0.836221	0.238217	0.0568778	#N/A	#N/A	#N/A
YER066W	38.7709	-0.615485	29.3461	-1.10853	0.493048	0.0568538	#N/A	#N/A	#N/A
YDL178W	51.5098	-0.0619297	41.8375	-0.498218	0.436289	0.056771	#N/A	#N/A	#N/A
YMR273C	39.482	-0.584587	43.332	-0.425201	-0.159386	0.0566061	#N/A	#N/A	#N/A
YNR059W	37.315	-0.678752	37.341	-0.717914	0.0391619	0.05647	#N/A	#N/A	#N/A
YHR113W	39.4094	-0.587743	59.9289	0.385705	-0.973448	0.0564599	#N/A	#N/A	#N/A
YAL060W	45.8854	-0.306334	61.1273	0.44426	-0.750594	0.0563578	#N/A	#N/A	#N/A
YMR238W	43.5246	-0.40892	43.5109	-0.41646	0.00753975	0.0562831	#N/A	#N/A	#N/A
YHR001W-A	14.7629	-1.65874	17.0987	-1.70693	0.048194	0.056154	#N/A	#N/A	#N/A
YLR035C	13.2173	-1.7259	15.1376	-1.80275	0.0768504	0.0560011	#N/A	#N/A	#N/A
YPR045C	81.1656	1.22674	76.8026	1.21014	0.0166003	0.0556507	#N/A	#N/A	#N/A
YKL045W	12.2121	-1.76958	15.2081	-1.7993	0.0297271	0.0555403	#N/A	#N/A	#N/A
YLR050C	7.24061	-1.98561	17.7928	-1.67302	-0.312593	0.0555034	#N/A	#N/A	#N/A
YOR189W	68.9164	0.69446	74.3143	1.08856	-0.3941	0.0552813	#N/A	#N/A	#N/A
YNL236W	76.113	1.00718	67.3017	0.745934	0.261249	0.0551903	#N/A	#N/A	#N/A
YDL097C	108.155	2.39953	88.6064	1.78686	0.612673	0.0549521	#N/A	#N/A	#N/A
YKR085C	80.2574	1.18727	74.4952	1.0974	0.0898751	0.054869	#N/A	#N/A	#N/A
YJL014W	67.688	0.64108	69.8243	0.869181	-0.2281	0.0546128	#N/A	#N/A	#N/A
YGL248W	4.97185	-2.0842	32.0943	-0.974263	-1.10993	0.0546107	#N/A	#N/A	#N/A
YMR287C	78.5616	1.11358	75.3854	1.14089	-0.0273092	0.0545499	#N/A	#N/A	#N/A
YOR316C	25.1768	-1.20621	25.4994	-1.29648	0.0902742	0.0544674	#N/A	#N/A	#N/A
YBR109C	69.5457	0.721807	56.8731	0.236401	0.485406	0.0544446	#N/A	#N/A	#N/A
YOR079C	69.1565	0.704893	46.0069	-0.294509	0.999402	0.054412	#N/A	#N/A	#N/A
YPL195W	69.0157	0.698775	60.0644	0.392326	0.306449	0.0542943	#N/A	#N/A	#N/A
YER080W	59.3906	0.280525	67.3303	0.747328	-0.466803	0.0542904	#N/A	#N/A	#N/A
YNL102W	19.516	-1.45219	30.851	-1.03501	-0.417185	0.0539034	#N/A	#N/A	#N/A
YBR269C	65.284	0.536615	65.3829	0.652184	-0.115569	0.0538444	#N/A	#N/A	#N/A
YKR095W-A	27.9255	-1.08677	23.0894	-1.41423	0.327466	0.0536633	#N/A	#N/A	#N/A
YPL100W	50.5043	-0.105623	51.3449	-0.0337018	-0.0719212	0.0535581	#N/A	#N/A	#N/A
YPL081W	65.3154	0.537981	53.404	0.0669059	0.471075	0.0533797	#N/A	#N/A	#N/A
YHR120W	49.2984	-0.158023	43.1243	-0.435349	0.277326	0.0532742	#N/A	#N/A	#N/A
YLR398C	63.3438	0.452309	66.0023	0.682446	-0.230137	0.053249	#N/A	#N/A	#N/A
YIL152W	54.069	0.0492799	56.9053	0.237974	-0.188694	0.0532229	#N/A	#N/A	#N/A
YDR258C	59.386	0.280323	52.1885	0.00751625	0.272807	0.0532013	#N/A	#N/A	#N/A
YDR205W	73.4624	0.892001	64.7583	0.621664	0.270338	0.0530753	#N/A	#N/A	#N/A
YPR021C	25.8124	-1.17859	32.2374	-0.96727	-0.211318	0.0529424	#N/A	#N/A	#N/A
YKL190W	54.4506	0.0658591	65.4744	0.656653	-0.590794	0.0528824	#N/A	#N/A	#N/A
YIL075C	94.2299	1.79444	83.2027	1.52284	0.2716	0.0528021	#N/A	#N/A	#N/A
YJR100C	34.853	-0.785737	32.1481	-0.971632	0.185895	0.0527668	#N/A	#N/A	#N/A
YAR027W	37.3934	-0.675345	37.0885	-0.730249	0.0549048	0.0527222	#N/A	#N/A	#N/A
YCR088W	73.7918	0.906314	68.2915	0.794294	0.112021	0.0527127	#N/A	#N/A	#N/A
YGR135W	80.9272	1.21638	77.2913	1.23401	-0.0176359	0.0526055	#N/A	#N/A	#N/A
YNL267W	82.7188	1.29423	80.2903	1.38054	-0.0863101	0.0525199	#N/A	#N/A	#N/A
YGR251W	34.794	-0.7883	37.7588	-0.697499	-0.0908018	0.052494	#N/A	#N/A	#N/A
YKR054C	50.0142	-0.126918	43.7864	-0.402997	0.276079	0.0521676	#N/A	#N/A	#N/A
YPR011C	32.1909	-0.901417	33.8307	-0.889425	-0.0119928	0.052148	#N/A	#N/A	#N/A
YLR038C	8.68557	-1.92282	9.28819	-2.08854	0.165724	0.0520568	#N/A	#N/A	#N/A
YDR198C	34.0975	-0.818564	34.2101	-0.870887	0.052323	0.0518011	#N/A	#N/A	#N/A
YPL014W	24.0801	-1.25386	28.921	-1.12931	-0.124556	0.0517842	#N/A	#N/A	#N/A
YDL202W	70.5788	0.766699	66.8821	0.725429	0.0412701	0.05164	#N/A	#N/A	#N/A
YGR188C	12.6589	-1.75016	10.1294	-2.04744	0.297279	0.0514243	#N/A	#N/A	#N/A
YHR166C	83.1819	1.31435	69.546	0.855586	0.458768	0.0512024	#N/A	#N/A	#N/A
YNL315C	67.589	0.63678	71.7054	0.961092	-0.324312	0.0509615	#N/A	#N/A	#N/A
YMR097C	55.2184	0.0992247	50.5486	-0.0726035	0.171828	0.0508931	#N/A	#N/A	#N/A
YBR268W	40.2455	-0.551412	41.5783	-0.510884	-0.0405276	0.0508861	#N/A	#N/A	#N/A
YNR034W	50.4641	-0.107368	46.5161	-0.26963	0.162261	0.0508604	#N/A	#N/A	#N/A
YMR241W	69.4526	0.717758	72.5391	1.00182	-0.284066	0.0506825	#N/A	#N/A	#N/A
YGL136C	42.9878	-0.432245	42.6893	-0.456603	0.0243583	0.0505324	#N/A	#N/A	#N/A
YFR045W	48.673	-0.185198	49.1261	-0.142107	-0.0430917	0.0504657	#N/A	#N/A	#N/A
YMR264W	55.9106	0.129305	53.1771	0.0558193	0.0734861	0.0498204	#N/A	#N/A	#N/A
YGR282C	95.245	1.83854	97.87	2.23947	-0.400922	0.0496609	#N/A	#N/A	#N/A
YCR076C	46.7826	-0.267345	49.4444	-0.126557	-0.140787	0.0494879	#N/A	#N/A	#N/A
YLR049C	15.5363	-1.62513	17.7155	-1.67679	0.0516669	0.0494069	#N/A	#N/A	#N/A
YGR165W	70.3516	0.756825	65.4545	0.655681	0.101143	0.0493499	#N/A	#N/A	#N/A
YAL040C	65.8085	0.559407	63.8583	0.577693	-0.0182864	0.0493052	#N/A	#N/A	#N/A
YDR032C	26.2963	-1.15756	42.8803	-0.447272	-0.710287	0.0492931	#N/A	#N/A	#N/A
YAL024C	43.6379	-0.403998	43.0901	-0.437018	0.0330201	0.0492349	#N/A	#N/A	#N/A
YPL053C	58.1465	0.226461	45.7113	-0.30895	0.535411	0.0490961	#N/A	#N/A	#N/A
YIR001C	48.1785	-0.206688	38.7015	-0.651444	0.444756	0.0490786	#N/A	#N/A	#N/A
YJL002C	64.4755	0.501483	74.3963	1.09257	-0.591085	0.0490614	#N/A	#N/A	#N/A
YDR367W	20.1851	-1.42312	14.1475	-1.85112	0.428006	0.0489111	#N/A	#N/A	#N/A
YNL111C	52.8837	-0.00222957	47.5917	-0.217075	0.214845	0.0488622	#N/A	#N/A	#N/A
YGR112W	44.5435	-0.364644	47.9498	-0.199583	-0.165061	0.048832	#N/A	#N/A	#N/A
YLR103C	10.4896	-1.84443	13.6332	-1.87625	0.0318206	0.0487511	#N/A	#N/A	#N/A
YML046W	64.9646	0.522738	58.5431	0.317997	0.204741	0.0484613	#N/A	#N/A	#N/A
YLR137W	37.0805	-0.688943	43.7198	-0.406255	-0.282688	0.0484446	#N/A	#N/A	#N/A
YGL001C	33.2875	-0.853765	30.3025	-1.06181	0.208043	0.0484209	#N/A	#N/A	#N/A
YKL077W	78.4014	1.10662	66.4427	0.70396	0.402661	0.0481794	#N/A	#N/A	#N/A
YIL010W	19.1848	-1.46658	27.7288	-1.18756	-0.279026	0.0481582	#N/A	#N/A	#N/A
YNL166C	75.2907	0.971449	64.747	0.62111	0.350339	0.0480039	#N/A	#N/A	#N/A
YKR083C	28.6398	-1.05573	32.9542	-0.932247	-0.12348	0.0479832	#N/A	#N/A	#N/A
YKR062W	65.531	0.54735	71.6377	0.957782	-0.410433	0.0478581	#N/A	#N/A	#N/A
YDR532C	48.1387	-0.208416	49.6088	-0.118525	-0.0898907	0.0477237	#N/A	#N/A	#N/A
YGR244C	26.3996	-1.15307	41.0619	-0.536114	-0.616958	0.0474681	#N/A	#N/A	#N/A
YNL230C	45.6292	-0.317465	49.0095	-0.147803	-0.169663	0.047461	#N/A	#N/A	#N/A
YBR080C	67.6782	0.640652	60.3206	0.404843	0.235809	0.0474424	#N/A	#N/A	#N/A
YDR335W	47.6049	-0.231612	38.6825	-0.652368	0.420756	0.0472448	#N/A	#N/A	#N/A
YGL011C	95.8174	1.86342	88.2656	1.7702	0.093217	0.0470593	#N/A	#N/A	#N/A
YKL079W	62.0978	0.398164	61.1082	0.443326	-0.0451615	0.046662	#N/A	#N/A	#N/A
YBR060C	67.8499	0.648114	61.9881	0.486317	0.161796	0.0465779	#N/A	#N/A	#N/A
YDR016C	45.9479	-0.303619	46.4871	-0.271046	-0.032573	0.0463287	#N/A	#N/A	#N/A
YNL260C	34.5014	-0.801014	40.3638	-0.570223	-0.230791	0.0462683	#N/A	#N/A	#N/A
YML109W	14.9084	-1.65241	14.7067	-1.8238	0.171388	0.0461772	#N/A	#N/A	#N/A
YGL163C	4.94342	-2.08543	15.4999	-1.78505	-0.300384	0.0461649	#N/A	#N/A	#N/A
YMR072W	81.1094	1.2243	75.9969	1.17077	0.0535274	0.0461036	#N/A	#N/A	#N/A
YJL011C	48.7204	-0.183138	51.0778	-0.0467501	-0.136388	0.0460829	#N/A	#N/A	#N/A
YCR054C	26.6912	-1.1404	28.029	-1.17289	0.0324878	0.0460231	#N/A	#N/A	#N/A
YDR494W	69.2161	0.707482	60.7236	0.424533	0.282949	0.0459313	#N/A	#N/A	#N/A
YGL153W	34.8371	-0.786428	38.7088	-0.651086	-0.135342	0.0458699	#N/A	#N/A	#N/A
YPL106C	98.4351	1.97717	89.2659	1.81908	0.158092	0.0458317	#N/A	#N/A	#N/A
YMR001C	50.8329	-0.0913427	33.051	-0.927518	0.836175	0.0455807	#N/A	#N/A	#N/A
YDR186C	65.2973	0.537194	64.0686	0.587966	-0.0507721	0.0454873	#N/A	#N/A	#N/A
YCR066W	46.3747	-0.285071	50.8704	-0.0568822	-0.228189	0.0454208	#N/A	#N/A	#N/A
YPL083C	46.6004	-0.275263	62.0772	0.490669	-0.765933	0.0453581	#N/A	#N/A	#N/A
YPL111W	19.2105	-1.46547	15.9563	-1.76275	0.297278	0.045176	#N/A	#N/A	#N/A
YMR080C	83.0154	1.30712	71.035	0.928334	0.378784	0.0451457	#N/A	#N/A	#N/A
YPR003C	42.9372	-0.434446	37.4271	-0.713707	0.279261	0.0451046	#N/A	#N/A	#N/A
YEL062W	38.2552	-0.637895	36.7875	-0.744959	0.107065	0.0450997	#N/A	#N/A	#N/A
YOR172W	74.8828	0.953722	73.7568	1.06132	-0.107599	0.0450847	#N/A	#N/A	#N/A
YLR386W	50.2447	-0.116903	52.0994	0.00316659	-0.12007	0.0449447	#N/A	#N/A	#N/A
YDR146C	57.3988	0.193972	63.7431	0.572061	-0.378089	0.0445575	#N/A	#N/A	#N/A
YDL223C	7.78529	-1.96194	15.7409	-1.77327	-0.188667	0.0445541	#N/A	#N/A	#N/A
YMR140W	58.3141	0.233745	64.0375	0.586448	-0.352703	0.0444378	#N/A	#N/A	#N/A
YGL053W	13.5047	-1.71341	30.3378	-1.06008	-0.653328	0.0442802	#N/A	#N/A	#N/A
YLR272C	38.7741	-0.61535	34.9197	-0.836215	0.220865	0.0442005	#N/A	#N/A	#N/A
YPR048W	60.7817	0.340972	61.2085	0.448226	-0.107254	0.0439439	#N/A	#N/A	#N/A
YOR247W	41.5206	-0.496003	33.7444	-0.893638	0.397634	0.0433785	#N/A	#N/A	#N/A
YGL012W	39.4391	-0.586453	47.6165	-0.215865	-0.370588	0.043364	#N/A	#N/A	#N/A
YKL001C	38.1184	-0.643842	36.3368	-0.766978	0.123136	0.0431878	#N/A	#N/A	#N/A
YLR064W	42.2441	-0.464562	52.47	0.0212717	-0.485834	0.0428609	#N/A	#N/A	#N/A
YGR255C	26.3278	-1.15619	38.7333	-0.649887	-0.506304	0.0426945	#N/A	#N/A	#N/A
YPR148C	54.6353	0.0738877	40.3918	-0.568854	0.642742	0.0426359	#N/A	#N/A	#N/A
YDL003W	9.78348	-1.87511	16.2025	-1.75072	-0.124392	0.0425936	#N/A	#N/A	#N/A
YGR044C	5.50174	-2.06117	13.3835	-1.88845	-0.172718	0.0422897	#N/A	#N/A	#N/A
YGR231C	82.5651	1.28755	76.2866	1.18492	0.102629	0.0421398	#N/A	#N/A	#N/A
YDL126C	85.671	1.42252	73.8293	1.06486	0.357651	0.0421352	#N/A	#N/A	#N/A
YOR109W	74.4271	0.933923	55.2849	0.158802	0.77512	0.0421283	#N/A	#N/A	#N/A
YKL129C	24.9483	-1.21613	28.1104	-1.16891	-0.0472212	0.042035	#N/A	#N/A	#N/A
YDR479C	63.5326	0.460513	60.3624	0.406885	0.0536278	0.0420224	#N/A	#N/A	#N/A
YGL133W	31.2245	-0.943408	31.6536	-0.995794	0.0523863	0.0419929	#N/A	#N/A	#N/A
YGL056C	62.2324	0.40401	65.5648	0.661069	-0.257059	0.0419682	#N/A	#N/A	#N/A
YPR055W	83.1683	1.31376	74.5981	1.10243	0.211337	0.0419641	#N/A	#N/A	#N/A
YER144C	57.3643	0.192474	44.4758	-0.369316	0.561789	0.0418918	#N/A	#N/A	#N/A
YLR143W	29.6945	-1.0099	30.0681	-1.07326	0.0633641	0.0418905	#N/A	#N/A	#N/A
YDL210W	10.1449	-1.8594	7.30548	-2.18542	0.326013	0.0418655	#N/A	#N/A	#N/A
YML059C	52.6639	-0.0117793	55.7166	0.179899	-0.191678	0.0418331	#N/A	#N/A	#N/A
YDR531W	73.0841	0.875561	68.1298	0.786391	0.0891695	0.0417223	#N/A	#N/A	#N/A
YMR158W	82.3138	1.27663	74.3043	1.08807	0.188559	0.0416825	#N/A	#N/A	#N/A
YML017W	35.2265	-0.769505	36.1912	-0.774091	0.00458584	0.0414614	#N/A	#N/A	#N/A
YGR126W	48.987	-0.171555	58.1131	0.296988	-0.468543	0.041336	#N/A	#N/A	#N/A
YFR044C	38.2343	-0.638806	54.1481	0.103264	-0.74207	0.0412548	#N/A	#N/A	#N/A
YNL263C	83.9292	1.34683	80.0843	1.37048	-0.0236485	0.0411609	#N/A	#N/A	#N/A
YJL029C	66.76	0.600757	64.3444	0.601441	-0.000684564	0.0411162	#N/A	#N/A	#N/A
YGL161C	77.2896	1.05831	61.2119	0.448391	0.609919	0.0410243	#N/A	#N/A	#N/A
YBL051C	72.4433	0.847716	65.0004	0.633492	0.214224	0.0409548	#N/A	#N/A	#N/A
YGR253C	87.7877	1.5145	85.5539	1.63771	-0.123217	0.0408829	#N/A	#N/A	#N/A
YGL196W	13.0452	-1.73338	25.5298	-1.295	-0.43838	0.0408368	#N/A	#N/A	#N/A
YGR258C	30.4233	-0.978225	46.3104	-0.279679	-0.698546	0.0406988	#N/A	#N/A	#N/A
YML080W	63.2305	0.447383	49.6823	-0.114931	0.562314	0.0406569	#N/A	#N/A	#N/A
YHR100C	23.1535	-1.29413	15.5879	-1.78075	0.486618	0.0405404	#N/A	#N/A	#N/A
YCR069W	35.088	-0.775526	45.8787	-0.300774	-0.474752	0.0403623	#N/A	#N/A	#N/A
YFL029C	45.7531	-0.312082	53.5867	0.075831	-0.387913	0.0403107	#N/A	#N/A	#N/A
YER130C	61.6653	0.379369	63.1749	0.5443	-0.164931	0.0402701	#N/A	#N/A	#N/A
YCR032W	51.2279	-0.0741794	43.2939	-0.427062	0.352882	0.0401497	#N/A	#N/A	#N/A
YML004C	73.7729	0.905494	69.1504	0.836258	0.0692358	0.0400221	#N/A	#N/A	#N/A
YEL015W	84.7433	1.3822	72.2471	0.987559	0.394643	0.0398757	#N/A	#N/A	#N/A
YCR081W	69.0966	0.702288	61.5523	0.46502	0.237268	0.039741	#N/A	#N/A	#N/A
YLR337C	62.6922	0.423993	62.6578	0.519037	-0.0950445	0.0394274	#N/A	#N/A	#N/A
YOR353C	55.2328	0.0998483	47.372	-0.227812	0.32766	0.0393095	#N/A	#N/A	#N/A
YAL029C	56.932	0.173689	58.3198	0.307086	-0.133397	0.039268	#N/A	#N/A	#N/A
YPR032W	30.3155	-0.982909	36.1992	-0.773703	-0.209206	0.0391387	#N/A	#N/A	#N/A
YKL145W	82.6343	1.29056	80.6961	1.40037	-0.10981	0.0388566	#N/A	#N/A	#N/A
YLR105C	41.2543	-0.507574	39.993	-0.588338	0.0807649	0.0387562	#N/A	#N/A	#N/A
YDR389W	59.2906	0.276177	59.5392	0.366665	-0.0904877	0.0385558	#N/A	#N/A	#N/A
YBR170C	81.4572	1.23941	70.8479	0.919197	0.32021	0.0384941	#N/A	#N/A	#N/A
YLR419W	69.8239	0.733893	78.5152	1.29381	-0.559918	0.0384651	#N/A	#N/A	#N/A
YMR214W	24.2547	-1.24628	33.2863	-0.916021	-0.330257	0.0384008	#N/A	#N/A	#N/A
YDR405W	80.6852	1.20586	87.6355	1.73942	-0.533557	0.0382895	#N/A	#N/A	#N/A
YIL112W	69.0595	0.700679	63.5252	0.561418	0.139261	0.0382718	#N/A	#N/A	#N/A
YAL001C	23.3184	-1.28696	18.5629	-1.63539	0.348427	0.0380966	#N/A	#N/A	#N/A
YBL104C	56.5132	0.155488	61.4613	0.460578	-0.30509	0.0378981	#N/A	#N/A	#N/A
YKR018C	65.9915	0.567362	59.1874	0.349477	0.217885	0.0377747	#N/A	#N/A	#N/A
YBR055C	54.0543	0.0486417	54.6203	0.126334	-0.0776927	0.0377275	#N/A	#N/A	#N/A
YHR180W	18.6919	-1.488	13.1242	-1.90112	0.413119	0.0376889	#N/A	#N/A	#N/A
YPL059W	74.4491	0.934879	75.5149	1.14722	-0.212339	0.0376523	#N/A	#N/A	#N/A
YDR183W	37.9456	-0.65135	42.3249	-0.474404	-0.176946	0.0376178	#N/A	#N/A	#N/A
YDR013W	9.18157	-1.90127	39.2436	-0.624955	-1.27631	0.037594	#N/A	#N/A	#N/A
YLL034C	35.4301	-0.760657	31.41	-1.00769	0.247038	0.0375446	#N/A	#N/A	#N/A
YMR201C	26.3003	-1.15739	27.755	-1.18628	0.0288893	0.0375225	#N/A	#N/A	#N/A
YNL099C	60.7328	0.338848	66.4488	0.70426	-0.365412	0.0374614	#N/A	#N/A	#N/A
YDR452W	53.476	0.0235103	57.5711	0.270506	-0.246996	0.0374259	#N/A	#N/A	#N/A
YOR064C	55.1499	0.0962466	66.1091	0.687664	-0.591418	0.0372857	#N/A	#N/A	#N/A
YJL115W	19.1951	-1.46614	18.5165	-1.63766	0.171523	0.0372439	#N/A	#N/A	#N/A
YDR298C	73.9387	0.912698	82.3901	1.48313	-0.570434	0.0372126	#N/A	#N/A	#N/A
YPR125W	65.6038	0.550514	67.4717	0.754239	-0.203725	0.03694	#N/A	#N/A	#N/A
YBR057C	75.3732	0.975033	78.0792	1.27251	-0.297473	0.0368879	#N/A	#N/A	#N/A
YMR195W	23.4618	-1.28073	42.1098	-0.484915	-0.795814	0.0368391	#N/A	#N/A	#N/A
YFR030W	21.6039	-1.36147	31.073	-1.02416	-0.337302	0.0367142	#N/A	#N/A	#N/A
YPR172W	28.4909	-1.06219	28.0582	-1.17146	0.109266	0.0366969	#N/A	#N/A	#N/A
YER122C	86.8738	1.47478	77.671	1.25256	0.222216	0.0365073	#N/A	#N/A	#N/A
YER021W	94.0907	1.78839	91.093	1.90835	-0.119962	0.0364502	#N/A	#N/A	#N/A
YPL177C	49.5589	-0.146704	53.2113	0.0574903	-0.204194	0.0363763	#N/A	#N/A	#N/A
YNL177C	66.2463	0.57843	61.7497	0.474666	0.103764	0.0357445	#N/A	#N/A	#N/A
YDR006C	86.9357	1.47747	87.8095	1.74792	-0.270449	0.0355684	#N/A	#N/A	#N/A
YDL018C	25.7383	-1.18181	37.569	-0.706776	-0.47503	0.0354711	#N/A	#N/A	#N/A
YJR137C	45.196	-0.33629	43.4993	-0.417024	0.0807342	0.035463	#N/A	#N/A	#N/A
YEL031W	90.4101	1.62845	74.2288	1.08438	0.54407	0.0354181	#N/A	#N/A	#N/A
YDR370C	58.6144	0.246794	47.5501	-0.219108	0.465902	0.0352975	#N/A	#N/A	#N/A
YDR486C	69.4917	0.719457	61.342	0.454746	0.264712	0.0350887	#N/A	#N/A	#N/A
YGR271C-A	21.8806	-1.34944	19.8717	-1.57144	0.222002	0.0350313	#N/A	#N/A	#N/A
YDR086C	66.7453	0.600117	66.5315	0.7083	-0.108183	0.0350229	#N/A	#N/A	#N/A
YLR382C	44.079	-0.384827	51.2171	-0.0399438	-0.344883	0.0349665	#N/A	#N/A	#N/A
YGL043W	76.1672	1.00954	72.5063	1.00022	0.00931498	0.0349535	#N/A	#N/A	#N/A
YOR239W	75.4602	0.978814	63.186	0.544845	0.433969	0.034864	#N/A	#N/A	#N/A
YOR118W	43.6573	-0.403155	42.7757	-0.452382	0.0492273	0.0348339	#N/A	#N/A	#N/A
YJL092W	49.0029	-0.170865	45.2064	-0.333618	0.162753	0.0346239	#N/A	#N/A	#N/A
YGL050W	53.7189	0.0340633	44.7212	-0.357326	0.391389	0.0345254	#N/A	#N/A	#N/A
YGR150C	69.7255	0.72962	55.7111	0.179628	0.549991	0.0344056	#N/A	#N/A	#N/A
YDL056W	70.5358	0.764828	62.401	0.506489	0.258339	0.0339496	#N/A	#N/A	#N/A
YNL251C	38.0616	-0.64631	37.6577	-0.702443	0.056133	0.0338804	#N/A	#N/A	#N/A
YBR120C	53.9975	0.0461694	60.1619	0.397091	-0.350921	0.0338802	#N/A	#N/A	#N/A
YDR529C	81.8263	1.25545	77.5208	1.24523	0.010223	0.03386	#N/A	#N/A	#N/A
YER163C	85.8466	1.43014	75.6551	1.15407	0.276076	0.0338357	#N/A	#N/A	#N/A
YLR089C	27.7146	-1.09593	34.0074	-0.880788	-0.21514	0.0336467	#N/A	#N/A	#N/A
YKR100C	62.0755	0.397193	63.4285	0.55669	-0.159497	0.0334702	#N/A	#N/A	#N/A
YOL028C	60.3858	0.323768	61.2814	0.451789	-0.128021	0.0333046	#N/A	#N/A	#N/A
YDR449C	46.3353	-0.286781	39.9404	-0.590911	0.30413	0.0332191	#N/A	#N/A	#N/A
YDR011W	29.8803	-1.00182	35.0719	-0.828779	-0.17304	0.0330703	#N/A	#N/A	#N/A
YIL095W	41.9363	-0.477935	42.1661	-0.482167	0.00423147	0.0329169	#N/A	#N/A	#N/A
YDR330W	70.601	0.767663	63.277	0.54929	0.218373	0.0329167	#N/A	#N/A	#N/A
YNL163C	38.5734	-0.624071	48.9292	-0.151729	-0.472342	0.0326289	#N/A	#N/A	#N/A
YBL016W	49.8999	-0.131885	35.3036	-0.817457	0.685572	0.0324842	#N/A	#N/A	#N/A
YNR033W	50.2263	-0.117701	54.4732	0.119144	-0.236845	0.0324066	#N/A	#N/A	#N/A
YAL041W	94.8736	1.82241	88.8071	1.79666	0.0257485	0.0323408	#N/A	#N/A	#N/A
YLR001C	24.0183	-1.25655	22.6649	-1.43497	0.178422	0.0322897	#N/A	#N/A	#N/A
YNL131W	70.2484	0.752339	72.7956	1.01436	-0.262018	0.0321329	#N/A	#N/A	#N/A
YNL243W	89.4195	1.5854	99.3584	2.31219	-0.726784	0.0317909	#N/A	#N/A	#N/A
YDR364C	64.3325	0.495269	52.0404	0.000280249	0.494989	0.0316264	#N/A	#N/A	#N/A
YLR250W	44.5316	-0.36516	52.6543	0.0302759	-0.395436	0.0315431	#N/A	#N/A	#N/A
YOL049W	61.5758	0.375479	59.0158	0.341093	0.0343854	0.0312477	#N/A	#N/A	#N/A
YKL026C	19.7622	-1.44149	21.756	-1.47938	0.0378851	0.0311338	#N/A	#N/A	#N/A
YOL094C	67.8501	0.648124	64.6112	0.614477	0.0336464	0.0311287	#N/A	#N/A	#N/A
YGL211W	25.637	-1.18621	33.0752	-0.926336	-0.259875	0.0310478	#N/A	#N/A	#N/A
YLR182W	63.5492	0.461233	61.0431	0.440144	0.0210889	0.0308433	#N/A	#N/A	#N/A
YER111C	17.7371	-1.52949	21.1897	-1.50705	-0.0224467	0.0308049	#N/A	#N/A	#N/A
YLR241W	34.6044	-0.796538	44.1374	-0.385849	-0.410689	0.0306463	#N/A	#N/A	#N/A
YBR257W	16.2043	-1.5961	16.8523	-1.71897	0.122868	0.0305291	#N/A	#N/A	#N/A
YGL215W	66.9878	0.610652	63.1162	0.541432	0.0692198	0.0305227	#N/A	#N/A	#N/A
YKL048C	75.5027	0.980662	64.9241	0.629766	0.350896	0.0301493	#N/A	#N/A	#N/A
YHR204W	65.3057	0.537559	49.5727	-0.120286	0.657845	0.030121	#N/A	#N/A	#N/A
YHR210C	20.4621	-1.41108	28.1381	-1.16756	-0.243524	0.0300456	#N/A	#N/A	#N/A
YEL003W	7.81219	-1.96077	9.01792	-2.10175	0.140976	0.0298961	#N/A	#N/A	#N/A
YBL038W	91.9658	1.69605	75.7073	1.15662	0.539433	0.0295086	#N/A	#N/A	#N/A
YPL008W	69.5672	0.722739	63.2521	0.548071	0.174667	0.0293297	#N/A	#N/A	#N/A
YJL149W	48.7099	-0.183596	56.8128	0.233455	-0.417051	0.0291904	#N/A	#N/A	#N/A
YBL036C	30.3971	-0.979365	36.9759	-0.735755	-0.243611	0.0288281	#N/A	#N/A	#N/A
YHR085W	40.3225	-0.548063	34.8226	-0.840959	0.292896	0.0287303	#N/A	#N/A	#N/A
YGR046W	54.0763	0.0495945	54.6518	0.127872	-0.0782778	0.0286989	#N/A	#N/A	#N/A
YMR193W	55.7521	0.122414	55.1975	0.154534	-0.03212	0.0285989	#N/A	#N/A	#N/A
YGR235C	67.0566	0.613643	57.8117	0.28226	0.331384	0.0284692	#N/A	#N/A	#N/A
YKL016C	70.5232	0.764283	68.4611	0.802578	-0.0382946	0.0283355	#N/A	#N/A	#N/A
YDR142C	49.5678	-0.146317	53.5219	0.0726666	-0.218983	0.0283101	#N/A	#N/A	#N/A
YDR262W	61.5808	0.375699	54.5234	0.121599	0.2541	0.0282908	#N/A	#N/A	#N/A
YMR227C	52.9168	-0.00078733	52.6492	0.0300255	-0.0308129	0.028196	#N/A	#N/A	#N/A
YCR015C	47.3003	-0.244849	44.4894	-0.368653	0.123805	0.0281478	#N/A	#N/A	#N/A
YDR312W	37.2281	-0.682527	36.0678	-0.78012	0.097593	0.0281028	#N/A	#N/A	#N/A
YOR103C	42.326	-0.461004	49.6709	-0.115489	-0.345516	0.0280406	#N/A	#N/A	#N/A
YNL242W	7.61767	-1.96922	13.9178	-1.86235	-0.106877	0.0280097	#N/A	#N/A	#N/A
YNL054W	52.7526	-0.00792424	55.2419	0.156706	-0.16463	0.0279592	#N/A	#N/A	#N/A
YDR177W	53.0783	0.00622921	65.9631	0.68053	-0.674301	0.0277123	#N/A	#N/A	#N/A
YOR044W	40.8364	-0.525732	32.979	-0.931039	0.405307	0.0277098	#N/A	#N/A	#N/A
YDR440W	28.0987	-1.07924	23.8015	-1.37944	0.300203	0.0275754	#N/A	#N/A	#N/A
YOR122C	83.3081	1.31984	81.3748	1.43353	-0.113688	0.02746	#N/A	#N/A	#N/A
YIL044C	70.3013	0.754638	61.5361	0.464233	0.290405	0.0272859	#N/A	#N/A	#N/A
YBR046C	10.3768	-1.84933	20.0883	-1.56086	-0.288469	0.0268761	#N/A	#N/A	#N/A
YMR155W	42.1758	-0.46753	40.3569	-0.57056	0.10303	0.0268411	#N/A	#N/A	#N/A
YDR122W	59.5954	0.289421	59.871	0.382877	-0.0934556	0.0266482	#N/A	#N/A	#N/A
YKL034W	51.6728	-0.0548464	59.9127	0.384913	-0.439759	0.0264246	#N/A	#N/A	#N/A
YIL059C	24.108	-1.25265	32.4334	-0.957692	-0.294961	0.0264145	#N/A	#N/A	#N/A
YKL170W	58.7319	0.2519	56.914	0.238398	0.0135021	0.0263805	#N/A	#N/A	#N/A
YJR109C	26.1848	-1.16241	19.9193	-1.56912	0.406712	0.0263744	#N/A	#N/A	#N/A
YPL060W	8.77355	-1.919	10.3716	-2.03561	0.116612	0.026168	#N/A	#N/A	#N/A
YOL141W	9.66149	-1.88041	8.3522	-2.13427	0.253862	0.0261395	#N/A	#N/A	#N/A
YDR528W	23.6695	-1.27171	27.9047	-1.17896	-0.0927457	0.0261223	#N/A	#N/A	#N/A
YER128W	40.0681	-0.55912	35.2963	-0.817818	0.258698	0.0259072	#N/A	#N/A	#N/A
YCR067C	74.6799	0.944906	74.4281	1.09412	-0.149213	0.0258717	#N/A	#N/A	#N/A
YPR168W	74.8125	0.950668	80.9567	1.4131	-0.462432	0.0258469	#N/A	#N/A	#N/A
YER151C	76.1886	1.01047	78.0683	1.27198	-0.261507	0.025831	#N/A	#N/A	#N/A
YPL180W	74.2648	0.926869	70.77	0.91539	0.0114788	0.0256951	#N/A	#N/A	#N/A
YML104C	23.7057	-1.27013	21.2735	-1.50295	0.232822	0.0254922	#N/A	#N/A	#N/A
YOL095C	25.1486	-1.20743	26.6195	-1.24176	0.0343227	0.0254808	#N/A	#N/A	#N/A
YHR200W	107.058	2.35187	95.0675	2.10254	0.249331	0.025446	#N/A	#N/A	#N/A
YFR052W	94.7196	1.81572	89.6729	1.83896	-0.0232472	0.02544	#N/A	#N/A	#N/A
YIL068C	42.756	-0.44232	40.2875	-0.573951	0.131631	0.025289	#N/A	#N/A	#N/A
YDR345C	14.3998	-1.67451	17.4886	-1.68788	0.0133673	0.025217	#N/A	#N/A	#N/A
YKL135C	60.3686	0.323022	62.5545	0.513987	-0.190964	0.0251314	#N/A	#N/A	#N/A
YDL028C	50.4511	-0.107934	45.6143	-0.31369	0.205757	0.0251313	#N/A	#N/A	#N/A
YDR293C	72.9643	0.870358	64.8914	0.628166	0.242192	0.0251048	#N/A	#N/A	#N/A
YOR259C	100.389	2.06207	84.8245	1.60208	0.459991	0.0250765	#N/A	#N/A	#N/A
YPL261C	89.5194	1.58974	73.8003	1.06345	0.526298	0.0248606	#N/A	#N/A	#N/A
YNL056W	52.3756	-0.024306	55.7365	0.180871	-0.205177	0.0248536	#N/A	#N/A	#N/A
YDL224C	72.0029	0.828579	58.7952	0.330315	0.498264	0.0246066	#N/A	#N/A	#N/A
YKL060C	57.4204	0.194911	61.1109	0.443456	-0.248546	0.0244497	#N/A	#N/A	#N/A
YCL030C	47.3817	-0.241311	57.3717	0.260761	-0.502072	0.0242358	#N/A	#N/A	#N/A
YNL059C	75.5379	0.98219	75.3138	1.13739	-0.155204	0.0241442	#N/A	#N/A	#N/A
YBR122C	62.6189	0.420808	66.5851	0.71092	-0.290112	0.0240788	#N/A	#N/A	#N/A
YDR507C	36.7471	-0.703428	35.4234	-0.811605	0.108177	0.0239821	#N/A	#N/A	#N/A
YLR114C	58.7411	0.252302	59.5182	0.365638	-0.113336	0.0235926	#N/A	#N/A	#N/A
YEL005C	23.8712	-1.26294	23.3849	-1.39979	0.136854	0.0235886	#N/A	#N/A	#N/A
YBR201W	21.0426	-1.38585	25.902	-1.27681	-0.109041	0.0235519	#N/A	#N/A	#N/A
YKL015W	49.3393	-0.156246	53.3679	0.0651402	-0.221386	0.0235401	#N/A	#N/A	#N/A
YLR414C	29.4864	-1.01894	33.286	-0.916039	-0.102897	0.0235095	#N/A	#N/A	#N/A
YCR003W	66.6242	0.594852	63.626	0.566342	0.0285101	0.0234129	#N/A	#N/A	#N/A
YDR073W	59.0838	0.267191	48.1548	-0.189565	0.456756	0.0233683	#N/A	#N/A	#N/A
YBR256C	52.2247	-0.0308624	58.5161	0.316679	-0.347541	0.0233669	#N/A	#N/A	#N/A
YGR036C	45.6626	-0.316012	44.8624	-0.350427	0.0344147	0.023333	#N/A	#N/A	#N/A
YKR078W	57.4881	0.197853	49.9994	-0.0994409	0.297294	0.0233092	#N/A	#N/A	#N/A
YOR106W	38.48	-0.628127	53.6824	0.0805072	-0.708635	0.0233022	#N/A	#N/A	#N/A
YKL122C	66.6389	0.595492	59.4015	0.359938	0.235554	0.0231999	#N/A	#N/A	#N/A
YDL168W	36.4376	-0.716879	44.6349	-0.361542	-0.355337	0.0229645	#N/A	#N/A	#N/A
YMR039C	43.5388	-0.408304	37.1731	-0.726118	0.317814	0.022951	#N/A	#N/A	#N/A
YMR028W	51.687	-0.0542313	51.376	-0.0321813	-0.02205	0.0228595	#N/A	#N/A	#N/A
YKR014C	51.2444	-0.0734631	41.9425	-0.493089	0.419625	0.0228262	#N/A	#N/A	#N/A
YPL118W	66.728	0.599364	62.4325	0.508027	0.0913365	0.0227268	#N/A	#N/A	#N/A
YLR381W	31.335	-0.938607	33.0957	-0.925334	-0.0132724	0.0226812	#N/A	#N/A	#N/A
YIL061C	38.4522	-0.629335	43.2464	-0.429385	-0.19995	0.0224966	#N/A	#N/A	#N/A
YDR017C	55.4916	0.111098	53.3222	0.06291	0.0481884	0.0220389	#N/A	#N/A	#N/A
YNL201C	53.4408	0.0219824	47.579	-0.217699	0.239681	0.0220103	#N/A	#N/A	#N/A
YNL283C	45.2577	-0.333609	53.5157	0.0723642	-0.405974	0.0218682	#N/A	#N/A	#N/A
YLR301W	56.736	0.165168	59.5429	0.366844	-0.201676	0.0218169	#N/A	#N/A	#N/A
YLR335W	86.9331	1.47736	85.286	1.62462	-0.147263	0.0217192	#N/A	#N/A	#N/A
YNL118C	72.4166	0.846555	63.0255	0.537002	0.309554	0.021706	#N/A	#N/A	#N/A
YDL061C	92.4007	1.71495	88.9531	1.80379	-0.0888437	0.0216355	#N/A	#N/A	#N/A
YML085C	44.0091	-0.387868	46.9745	-0.247232	-0.140635	0.0215977	#N/A	#N/A	#N/A
YBR185C	50.3413	-0.112705	44.0627	-0.389498	0.276793	0.0215072	#N/A	#N/A	#N/A
YJR052W	44.9484	-0.34705	47.2584	-0.233362	-0.113688	0.021234	#N/A	#N/A	#N/A
YKL141W	67.3242	0.625272	69.22	0.839659	-0.214388	0.0209787	#N/A	#N/A	#N/A
YPL091W	70.3981	0.758847	69.1385	0.835676	-0.0768286	0.0208242	#N/A	#N/A	#N/A
YMR263W	60.6254	0.33418	55.1969	0.154505	0.179675	0.0205948	#N/A	#N/A	#N/A
YDR020C	21.6242	-1.36058	25.7802	-1.28276	-0.0778189	0.020385	#N/A	#N/A	#N/A
YJR042W	65.4784	0.545063	55.3622	0.162581	0.382482	0.0202545	#N/A	#N/A	#N/A
YMR236W	108.885	2.43126	97.7157	2.23192	0.199341	0.0201828	#N/A	#N/A	#N/A
YML005W	20.7978	-1.39649	25.1415	-1.31397	-0.0825231	0.0199956	#N/A	#N/A	#N/A
YGL187C	38.4556	-0.62919	45.5824	-0.315248	-0.313942	0.0197791	#N/A	#N/A	#N/A
YHR150W	51.3723	-0.0679048	50.8107	-0.0597976	-0.00810725	0.0196848	#N/A	#N/A	#N/A
YDL077C	49.8633	-0.133475	45.1911	-0.334368	0.200893	0.0194601	#N/A	#N/A	#N/A
YNL185C	71.0554	0.787407	68.2605	0.792778	-0.00537076	0.0193744	#N/A	#N/A	#N/A
YLR436C	92.3555	1.71298	84.6557	1.59383	0.119158	0.0193231	#N/A	#N/A	#N/A
YOR191W	84.2839	1.36224	64.7076	0.619189	0.74305	0.0192528	#N/A	#N/A	#N/A
YHL035C	45.2518	-0.333864	37.6931	-0.700713	0.366849	0.0191569	#N/A	#N/A	#N/A
YPL006W	58.7547	0.252891	65.0138	0.634147	-0.381256	0.0189927	#N/A	#N/A	#N/A
YPR083W	70.0314	0.74291	61.163	0.446001	0.296909	0.0189628	#N/A	#N/A	#N/A
YKL039W	66.3237	0.581797	66.8794	0.725299	-0.143502	0.0189503	#N/A	#N/A	#N/A
YHR074W	73.7031	0.90246	62.6086	0.516633	0.385827	0.018805	#N/A	#N/A	#N/A
YJR138W	51.2493	-0.0732484	51.8002	-0.0114522	-0.0617962	0.0187733	#N/A	#N/A	#N/A
YLR275W	42.9602	-0.433443	37.0185	-0.733671	0.300228	0.0187542	#N/A	#N/A	#N/A
YMR153W	78.0441	1.0911	62.1248	0.492995	0.5981	0.0187437	#N/A	#N/A	#N/A
YIL119C	8.91446	-1.91287	17.2514	-1.69947	-0.213402	0.0186901	#N/A	#N/A	#N/A
YPR104C	36.6602	-0.707206	44.2899	-0.378397	-0.328809	0.0186205	#N/A	#N/A	#N/A
YBR059C	52.8412	-0.00407529	61.1279	0.444289	-0.448364	0.0185546	#N/A	#N/A	#N/A
YDL236W	65.3179	0.538089	62.8657	0.529192	0.00889719	0.0184565	#N/A	#N/A	#N/A
YJL010C	52.6054	-0.0143213	45.2778	-0.330132	0.315811	0.0183619	#N/A	#N/A	#N/A
YER134C	67.5835	0.636539	69.4788	0.852301	-0.215762	0.0182302	#N/A	#N/A	#N/A
YMR247C	33.346	-0.851222	35.0766	-0.828551	-0.022671	0.0179809	#N/A	#N/A	#N/A
YNL231C	42.9631	-0.433319	46.8713	-0.252275	-0.181044	0.0179463	#N/A	#N/A	#N/A
YOR271C	55.1433	0.09596	68.5627	0.807542	-0.711582	0.0178823	#N/A	#N/A	#N/A
YKR077W	20.1098	-1.42639	24.8611	-1.32767	-0.0987222	0.017867	#N/A	#N/A	#N/A
YBL052C	49.8718	-0.133107	37.0031	-0.734424	0.601317	0.0178157	#N/A	#N/A	#N/A
YBR239C	60.537	0.330338	59.7818	0.378516	-0.0481781	0.0178077	#N/A	#N/A	#N/A
YOL149W	65.9618	0.566068	67.1036	0.736254	-0.170186	0.0178053	#N/A	#N/A	#N/A
YIL114C	7.34687	-1.98099	9.24376	-2.09071	0.109722	0.0175045	#N/A	#N/A	#N/A
YCR024C	40.3633	-0.546293	36.1702	-0.775116	0.228823	0.0174505	#N/A	#N/A	#N/A
YOR058C	46.7844	-0.267266	38.1954	-0.676169	0.408903	0.0174418	#N/A	#N/A	#N/A
YNL215W	70.3919	0.758574	71.3534	0.943894	-0.18532	0.0173766	#N/A	#N/A	#N/A
YOR097C	50.6118	-0.100951	59.5425	0.366827	-0.467778	0.0173599	#N/A	#N/A	#N/A
YJL096W	60.8105	0.342225	60.4206	0.409728	-0.0675032	0.0171991	#N/A	#N/A	#N/A
YMR119W	45.2881	-0.332286	39.6547	-0.604868	0.272582	0.0169839	#N/A	#N/A	#N/A
YMR233W	52.4666	-0.0203526	46.1142	-0.289268	0.268915	0.0168581	#N/A	#N/A	#N/A
YGL112C	69.1631	0.705178	72.301	0.990194	-0.285016	0.0167742	#N/A	#N/A	#N/A
YCR020W-B	50.8921	-0.0887698	49.1258	-0.142124	0.0533543	0.0167041	#N/A	#N/A	#N/A
YBR213W	6.09756	-2.03528	9.09891	-2.09779	0.062512	0.0165015	#N/A	#N/A	#N/A
YMR259C	33.907	-0.826842	42.5537	-0.463227	-0.363615	0.0161756	#N/A	#N/A	#N/A
YLR165C	27.9257	-1.08676	33.4078	-0.910085	-0.17667	0.0161465	#N/A	#N/A	#N/A
YDR113C	44.2512	-0.377347	56.9375	0.239548	-0.616895	0.0161103	#N/A	#N/A	#N/A
YNL121C	71.5635	0.809485	77.1137	1.22534	-0.415851	0.0158826	#N/A	#N/A	#N/A
YHR004C	45.9563	-0.303252	43.7071	-0.406872	0.103621	0.0158538	#N/A	#N/A	#N/A
YJR099W	27.8567	-1.08975	31.454	-1.00555	-0.0842073	0.015367	#N/A	#N/A	#N/A
YIL051C	73.4571	0.89177	75.6301	1.15285	-0.261077	0.0153137	#N/A	#N/A	#N/A
YIR004W	58.6485	0.248276	60.4726	0.412268	-0.163992	0.015249	#N/A	#N/A	#N/A
YHL013C	39.6071	-0.579151	28.835	-1.13351	0.554355	0.0152371	#N/A	#N/A	#N/A
YKR068C	64.2007	0.489542	52.8638	0.0405126	0.44903	0.015035	#N/A	#N/A	#N/A
YLR026C	83.2031	1.31527	59.0673	0.343607	0.971667	0.0150116	#N/A	#N/A	#N/A
YKL140W	22.4361	-1.3253	25.0356	-1.31914	-0.00615979	0.0150091	#N/A	#N/A	#N/A
YPL034W	52.3038	-0.0274269	46.857	-0.252971	0.225545	0.0149716	#N/A	#N/A	#N/A
YNL244C	71.7288	0.816668	75.742	1.15832	-0.341649	0.0149387	#N/A	#N/A	#N/A
YIR029W	5.19238	-2.07461	4.1227	-2.34092	0.26631	0.014732	#N/A	#N/A	#N/A
YKL150W	49.1316	-0.165271	46.7896	-0.256265	0.0909935	0.0146865	#N/A	#N/A	#N/A
YLR443W	47.8685	-0.220159	46.1763	-0.286233	0.0660731	0.0146509	#N/A	#N/A	#N/A
YJR005W	51.3019	-0.0709621	54.3625	0.113735	-0.184697	0.0145877	#N/A	#N/A	#N/A
YGL206C	83.9434	1.34745	75.0653	1.12525	0.222194	0.0145639	#N/A	#N/A	#N/A
YJR010W	19.587	-1.44911	17.2933	-1.69742	0.248313	0.014552	#N/A	#N/A	#N/A
YHR078W	43.5032	-0.409851	41.7226	-0.503832	0.0939813	0.0142238	#N/A	#N/A	#N/A
YOL023W	63.201	0.446103	47.237	-0.234409	0.680512	0.014054	#N/A	#N/A	#N/A
YIL162W	22.501	-1.32248	24.9746	-1.32212	-0.000359014	0.0139718	#N/A	#N/A	#N/A
YNL290W	66.9649	0.609658	54.45	0.118013	0.491645	0.0137279	#N/A	#N/A	#N/A
YKR064W	79.8052	1.16762	71.2356	0.938136	0.229485	0.0136667	#N/A	#N/A	#N/A
YFR031C	54.8223	0.0820106	55.4881	0.168731	-0.0867201	0.0136093	#N/A	#N/A	#N/A
YKL058W	53.3667	0.0187601	56.1241	0.199807	-0.181047	0.0132675	#N/A	#N/A	#N/A
YJL070C	14.8884	-1.65328	15.2765	-1.79596	0.142679	0.0132524	#N/A	#N/A	#N/A
YDR318W	25.3808	-1.19734	27.3004	-1.20849	0.0111437	0.0130918	#N/A	#N/A	#N/A
YCR028C-A	49.9426	-0.13003	43.0358	-0.439673	0.309643	0.0130887	#N/A	#N/A	#N/A
YMR205C	85.0561	1.3958	81.0126	1.41583	-0.0200343	0.0129579	#N/A	#N/A	#N/A
YOR211C	67.838	0.647597	73.8626	1.06649	-0.418894	0.0129251	#N/A	#N/A	#N/A
YER048W-A	32.0639	-0.906936	49.7325	-0.11248	-0.794456	0.0128206	#N/A	#N/A	#N/A
YKL063C	56.9479	0.174378	55.8835	0.18805	-0.013672	0.0127817	#N/A	#N/A	#N/A
YAL011W	54.76	0.0793038	57.4291	0.263569	-0.184265	0.0127186	#N/A	#N/A	#N/A
YNL070W	48.2301	-0.204445	47.0699	-0.242573	0.0381286	0.0126498	#N/A	#N/A	#N/A
YMR240C	51.9655	-0.0421279	58.487	0.315258	-0.357386	0.0125999	#N/A	#N/A	#N/A
YDL165W	78.6932	1.1193	71.1635	0.934614	0.184688	0.0124111	#N/A	#N/A	#N/A
YIL043C	70.4198	0.759787	74.1691	1.08147	-0.321679	0.0122938	#N/A	#N/A	#N/A
YLR229C	68.9905	0.697678	46.7548	-0.257968	0.955647	0.0122655	#N/A	#N/A	#N/A
YKL195W	97.5557	1.93895	84.9194	1.60671	0.33224	0.0122326	#N/A	#N/A	#N/A
YJR085C	33.141	-0.860129	33.8045	-0.890703	0.0305738	0.0122318	#N/A	#N/A	#N/A
YMR144W	24.3771	-1.24096	33.3879	-0.911059	-0.329899	0.0122182	#N/A	#N/A	#N/A
YBL058W	102.105	2.13666	94.7884	2.0889	0.0477573	0.0120477	#N/A	#N/A	#N/A
YBR242W	41.1546	-0.511908	45.4402	-0.322199	-0.189709	0.012029	#N/A	#N/A	#N/A
YIL137C	67.1693	0.61854	49.3283	-0.132228	0.750769	0.0120179	#N/A	#N/A	#N/A
YJL187C	19.7686	-1.44122	15.6303	-1.77867	0.337455	0.0118986	#N/A	#N/A	#N/A
YLR253W	71.4199	0.803245	67.7471	0.767694	0.0355504	0.0117634	#N/A	#N/A	#N/A
YLR044C	7.56722	-1.97142	14.4025	-1.83866	-0.132752	0.0117404	#N/A	#N/A	#N/A
YBR200W	31.2063	-0.944201	46.1313	-0.288432	-0.655769	0.0115541	#N/A	#N/A	#N/A
YCL050C	56.5259	0.156039	46.785	-0.256489	0.412528	0.0114522	#N/A	#N/A	#N/A
YJL162C	35.5597	-0.755029	27.3708	-1.20505	0.450017	0.0112049	#N/A	#N/A	#N/A
YGL191W	58.6997	0.250501	65.7455	0.669898	-0.419397	0.011084	#N/A	#N/A	#N/A
YGR049W	37.7685	-0.659048	40.5384	-0.561694	-0.0973534	0.010836	#N/A	#N/A	#N/A
YDR372C	59.117	0.268635	51.3708	-0.0324337	0.301068	0.0107817	#N/A	#N/A	#N/A
YKR029C	77.4416	1.06492	72.0124	0.976093	0.0888226	0.0107108	#N/A	#N/A	#N/A
YOR023C	87.8572	1.51751	87.3295	1.72447	-0.206953	0.0106429	#N/A	#N/A	#N/A
YPR084W	66.7352	0.599679	71.1695	0.93491	-0.335231	0.0105327	#N/A	#N/A	#N/A
YNL139C	61.8565	0.387678	64.4907	0.60859	-0.220912	0.0103694	#N/A	#N/A	#N/A
YDR211W	75.0679	0.961769	74.5779	1.10144	-0.13967	0.00998894	#N/A	#N/A	#N/A
YMR110C	36.8254	-0.700025	42.6795	-0.457083	-0.242942	0.00993932	#N/A	#N/A	#N/A
YJR065C	69.519	0.720645	81.3091	1.43032	-0.70967	0.00993236	#N/A	#N/A	#N/A
YDR103W	76.8868	1.0408	67.458	0.753566	0.287238	0.00993162	#N/A	#N/A	#N/A
YDR306C	63.049	0.439498	61.3551	0.455386	-0.0158889	0.00991491	#N/A	#N/A	#N/A
YLL013C	52.894	-0.00177874	52.919	0.0432103	-0.0449891	0.00990459	#N/A	#N/A	#N/A
YJL081C	69.2209	0.70769	64.8755	0.627392	0.0802975	0.00980411	#N/A	#N/A	#N/A
YBR102C	74.7045	0.945976	74.5373	1.09946	-0.153479	0.00961812	#N/A	#N/A	#N/A
YDR339C	69.5935	0.723881	55.8465	0.186243	0.537638	0.00954353	#N/A	#N/A	#N/A
YOR165W	77.7848	1.07983	66.5914	0.71123	0.368598	0.00949402	#N/A	#N/A	#N/A
YPL011C	85.4339	1.41221	81.386	1.43407	-0.0218619	0.00903094	#N/A	#N/A	#N/A
YPL078C	81.7159	1.25065	73.6277	1.05501	0.195636	0.00900598	#N/A	#N/A	#N/A
YDR144C	40.4573	-0.542208	39.2523	-0.624532	0.0823236	0.00892905	#N/A	#N/A	#N/A
YLR033W	43.2293	-0.421749	44.1159	-0.386901	-0.0348486	0.00890161	#N/A	#N/A	#N/A
YDR045C	52.2069	-0.0316356	37.2302	-0.723329	0.691694	0.00880037	#N/A	#N/A	#N/A
YPL176C	62.8008	0.428712	52.1393	0.0051119	0.4236	0.00875965	#N/A	#N/A	#N/A
YJL143W	70.4273	0.760114	81.158	1.42294	-0.662821	0.00873166	#N/A	#N/A	#N/A
YLR370C	86.5981	1.4628	81.2595	1.4279	0.0349085	0.00871283	#N/A	#N/A	#N/A
YNL250W	38.5719	-0.624133	34.04	-0.879199	0.255066	0.00842686	#N/A	#N/A	#N/A
YOR354C	69.0477	0.700167	62.5723	0.514858	0.185308	0.0081274	#N/A	#N/A	#N/A
YDL116W	75.3114	0.97235	65.201	0.643295	0.329055	0.00812358	#N/A	#N/A	#N/A
YJR104C	74.2113	0.924547	70.6424	0.909155	0.0153918	0.0079127	#N/A	#N/A	#N/A
YDR519W	45.5913	-0.319111	39.921	-0.591856	0.272745	0.00775794	#N/A	#N/A	#N/A
YGL185C	10.3069	-1.85236	17.6199	-1.68146	-0.170902	0.00734261	#N/A	#N/A	#N/A
YMR207C	25.0371	-1.21228	28.8768	-1.13146	-0.080812	0.00732725	#N/A	#N/A	#N/A
YOR022C	44.4222	-0.369915	37.7718	-0.696864	0.326949	0.00729105	#N/A	#N/A	#N/A
YOL103W	72.2201	0.838019	70.8157	0.917621	-0.0796023	0.00720819	#N/A	#N/A	#N/A
YNL161W	79.2978	1.14557	68.6019	0.80946	0.336112	0.00707328	#N/A	#N/A	#N/A
YDR328C	65.5979	0.550255	72.8014	1.01464	-0.464388	0.00677304	#N/A	#N/A	#N/A
YJL134W	52.1192	-0.0354503	56.799	0.232783	-0.268234	0.00671825	#N/A	#N/A	#N/A
YDR337W	67.9799	0.653764	67.9821	0.779177	-0.125413	0.00648426	#N/A	#N/A	#N/A
YKL043W	15.3385	-1.63372	18.6641	-1.63045	-0.00327408	0.00642832	#N/A	#N/A	#N/A
YJR097W	12.7617	-1.74569	8.02372	-2.15032	0.40463	0.00641388	#N/A	#N/A	#N/A
YAL051W	48.5954	-0.18857	43.2859	-0.427455	0.238885	0.0064046	#N/A	#N/A	#N/A
YNR054C	65.3448	0.539259	57.7544	0.279462	0.259797	0.00626381	#N/A	#N/A	#N/A
YPR071W	21.6709	-1.35855	21.3293	-1.50023	0.141673	0.00617803	#N/A	#N/A	#N/A
YLR427W	56.1992	0.141845	49.6668	-0.115689	0.257534	0.00613222	#N/A	#N/A	#N/A
YNL138W	72.9097	0.867985	66.0625	0.685384	0.182601	0.00594702	#N/A	#N/A	#N/A
YDR466W	44.1274	-0.382727	52.1538	0.005825	-0.388552	0.00589382	#N/A	#N/A	#N/A
YHR086W	65.8061	0.559304	58.3638	0.309238	0.250067	0.00585009	#N/A	#N/A	#N/A
YLR210W	64.4685	0.501179	56.6009	0.223103	0.278076	0.00581117	#N/A	#N/A	#N/A
YEL046C	72.6013	0.854582	77.5477	1.24654	-0.391959	0.00580657	#N/A	#N/A	#N/A
YHR194W	25.7001	-1.18347	26.147	-1.26484	0.0813701	0.00570719	#N/A	#N/A	#N/A
YDR319C	43.8387	-0.395272	42.4099	-0.470252	0.0749799	0.005676	#N/A	#N/A	#N/A
YPR093C	61.9426	0.391419	63.5201	0.561169	-0.16975	0.00549144	#N/A	#N/A	#N/A
YLR215C	26.1551	-1.16369	34.2237	-0.870221	-0.293472	0.00545658	#N/A	#N/A	#N/A
YMR268C	49.6024	-0.144815	45.1178	-0.33795	0.193134	0.00539733	#N/A	#N/A	#N/A
YNL127W	56.2789	0.145306	47.5695	-0.218159	0.363464	0.00538377	#N/A	#N/A	#N/A
YHR081W	37.6485	-0.664262	43.6883	-0.407792	-0.25647	0.00537921	#N/A	#N/A	#N/A
YJL049W	58.915	0.259856	59.7787	0.378367	-0.118511	0.00525462	#N/A	#N/A	#N/A
YNL224C	57.7218	0.208007	63.1951	0.545288	-0.337281	0.00506217	#N/A	#N/A	#N/A
YIR018W	51.0297	-0.0827918	60.9202	0.434137	-0.516929	0.0050573	#N/A	#N/A	#N/A
YDR227W	52.9431	0.000355079	43.9006	-0.397418	0.397773	0.00502552	#N/A	#N/A	#N/A
YNL036W	31.9757	-0.910765	32.0443	-0.976704	0.0659393	0.00501492	#N/A	#N/A	#N/A
YKL089W	21.5798	-1.36251	23.8673	-1.37622	0.0137104	0.00482642	#N/A	#N/A	#N/A
YER167W	51.9205	-0.0440833	51.1752	-0.0419888	-0.00209451	0.00472828	#N/A	#N/A	#N/A
YGR002C	76.0564	1.00472	76.1161	1.17659	-0.171871	0.00465467	#N/A	#N/A	#N/A
YNL297C	82.5853	1.28843	77.5978	1.24899	0.0394399	0.00449811	#N/A	#N/A	#N/A
YPL069C	41.6805	-0.489052	38.6063	-0.656095	0.167044	0.00448086	#N/A	#N/A	#N/A
YEL052W	51.1813	-0.0762052	48.1695	-0.188845	0.11264	0.00442276	#N/A	#N/A	#N/A
YER058W	32.4682	-0.889366	31.901	-0.983705	0.0943392	0.00441005	#N/A	#N/A	#N/A
YNL258C	59.7525	0.29625	52.839	0.0393024	0.256948	0.00427305	#N/A	#N/A	#N/A
YEL022W	70.3224	0.755555	40.9065	-0.543708	1.29926	0.00411913	#N/A	#N/A	#N/A
YEL029C	34.3879	-0.805947	36.869	-0.740974	-0.0649725	0.00402188	#N/A	#N/A	#N/A
YGR277C	69.5116	0.720325	61.4475	0.459901	0.260423	0.00394449	#N/A	#N/A	#N/A
YDL171C	46.7552	-0.268535	45.5421	-0.31722	0.0486851	0.00389385	#N/A	#N/A	#N/A
YIR007W	17.2524	-1.55055	18.3615	-1.64523	0.0946772	0.00370696	#N/A	#N/A	#N/A
YOR233W	58.2737	0.231989	41.9969	-0.49043	0.722419	0.00370367	#N/A	#N/A	#N/A
YMR091C	73.4291	0.890555	65.2789	0.647102	0.243454	0.00365336	#N/A	#N/A	#N/A
YER112W	48.2046	-0.205554	52.664	0.0307496	-0.236303	0.00363134	#N/A	#N/A	#N/A
YLR212C	29.6618	-1.01132	34.0205	-0.88015	-0.131166	0.00355483	#N/A	#N/A	#N/A
YPL103C	55.8233	0.125511	50.7356	-0.0634696	0.188981	0.003535	#N/A	#N/A	#N/A
YPL258C	22.32	-1.33035	20.7747	-1.52732	0.196976	0.00353445	#N/A	#N/A	#N/A
YJR090C	67.892	0.649946	63.6335	0.566706	0.0832394	0.00344731	#N/A	#N/A	#N/A
YMR274C	26.0048	-1.17023	27.5127	-1.19812	0.0278874	0.00341299	#N/A	#N/A	#N/A
YLR392C	50.9057	-0.0881823	44.8259	-0.35221	0.264028	0.00329725	#N/A	#N/A	#N/A
YDL054C	26.1027	-1.16597	29.0975	-1.12068	-0.0452915	0.0032161	#N/A	#N/A	#N/A
YFL025C	42.0476	-0.473102	39.5639	-0.609307	0.136205	0.00318947	#N/A	#N/A	#N/A
YMR202W	57.6285	0.203954	64.1582	0.592345	-0.388391	0.00308685	#N/A	#N/A	#N/A
YEL056W	74.3709	0.931479	72.3296	0.991591	-0.0601115	0.0029757	#N/A	#N/A	#N/A
YHR066W	54.5871	0.0717906	49.3512	-0.131112	0.202902	0.00279298	#N/A	#N/A	#N/A
YNL119W	38.9975	-0.605639	33.0581	-0.927173	0.321534	0.00269388	#N/A	#N/A	#N/A
YFL049W	47.0505	-0.255704	43.1904	-0.432118	0.176414	0.00264599	#N/A	#N/A	#N/A
YMR088C	50.102	-0.123104	50.1703	-0.0910905	-0.0320135	0.00254211	#N/A	#N/A	#N/A
YKR024C	55.0554	0.0921406	44.3503	-0.37545	0.46759	0.00251392	#N/A	#N/A	#N/A
YDR308C	43.137	-0.425762	51.3554	-0.0331866	-0.392575	0.00204737	#N/A	#N/A	#N/A
YAL026C	69.1928	0.706471	58.2715	0.304728	0.401743	0.00202638	#N/A	#N/A	#N/A
YMR185W	19.0324	-1.47321	16.9729	-1.71307	0.239868	0.00195221	#N/A	#N/A	#N/A
YFL005W	62.1333	0.399704	50.6624	-0.067047	0.466751	0.00189771	#N/A	#N/A	#N/A
YDR338C	45.4111	-0.326945	41.0346	-0.537451	0.210506	0.00176163	#N/A	#N/A	#N/A
YNL050C	40.9187	-0.522158	38.2501	-0.673498	0.15134	0.00172408	#N/A	#N/A	#N/A
YDR283C	38.6113	-0.622421	39.4478	-0.614978	-0.00744325	0.00172117	#N/A	#N/A	#N/A
YDR323C	46.0018	-0.301276	41.5447	-0.512525	0.21125	0.00164465	#N/A	#N/A	#N/A
YHR133C	54.116	0.0513203	59.8217	0.380466	-0.329146	0.00162014	#N/A	#N/A	#N/A
YJL072C	61.5972	0.376411	50.0948	-0.0947798	0.47119	0.00145669	#N/A	#N/A	#N/A
YEL051W	80.6697	1.20519	68.2733	0.793401	0.411786	0.00139646	#N/A	#N/A	#N/A
YDR099W	55.9982	0.133112	47.459	-0.223561	0.356673	0.00126107	#N/A	#N/A	#N/A
YDR130C	73.3207	0.885845	64.7862	0.623026	0.262819	0.00107241	#N/A	#N/A	#N/A
YDR159W	57.1492	0.183127	53.4823	0.0707311	0.112396	0.00103534	#N/A	#N/A	#N/A
YMR270C	74.1011	0.919755	66.7263	0.717817	0.201938	0.00069386	#N/A	#N/A	#N/A
YJR118C	12.4799	-1.75794	17.0422	-1.70969	-0.0482463	0.000665421	#N/A	#N/A	#N/A
YPL145C	74.5716	0.940202	65.4668	0.656282	0.28392	0.000573941	#N/A	#N/A	#N/A
YJL025W	51.1946	-0.0756277	55.504	0.169509	-0.245137	0.000426849	#N/A	#N/A	#N/A
YLR430W	35.0996	-0.775021	30.9306	-1.03112	0.256101	0.00035282	#N/A	#N/A	#N/A
YLR450W	42.4615	-0.455115	47.1835	-0.237023	-0.218092	0.000295443	#N/A	#N/A	#N/A
YKR087C	52.4187	-0.0224329	44.6691	-0.359872	0.337439	1.25242e-05	#N/A	#N/A	#N/A
YGL219C	75.1038	0.963329	74.1868	1.08233	-0.119004	-8.31257e-05	#N/A	#N/A	#N/A
YBR165W	64.4445	0.500136	61.7239	0.473405	0.0267307	-0.000213421	#N/A	#N/A	#N/A
YNL173C	41.1448	-0.512332	40.9047	-0.543796	0.0314645	-0.0003462	#N/A	#N/A	#N/A
YMR284W	32.7498	-0.877128	23.7433	-1.38228	0.505156	-0.000351379	#N/A	#N/A	#N/A
YOR337W	35.5415	-0.755818	36.3306	-0.767282	0.0114638	-0.000401988	#N/A	#N/A	#N/A
YCR072C	46.6428	-0.273421	46.1632	-0.286872	0.0134514	-0.000995574	#N/A	#N/A	#N/A
YDR037W	89.9211	1.6072	79.0279	1.31886	0.288342	-0.00111374	#N/A	#N/A	#N/A
YGR001C	47.5393	-0.234464	37.865	-0.692311	0.457847	-0.00112183	#N/A	#N/A	#N/A
YJL012C	50.0222	-0.126571	55.7796	0.182977	-0.309547	-0.00114125	#N/A	#N/A	#N/A
YJR124C	38.2364	-0.638715	43.1468	-0.434251	-0.204464	-0.00117069	#N/A	#N/A	#N/A
YJL104W	55.9898	0.132746	55.0888	0.149224	-0.0164784	-0.00119651	#N/A	#N/A	#N/A
YJL093C	51.8231	-0.0483142	60.2503	0.401409	-0.449723	-0.00165495	#N/A	#N/A	#N/A
YIR011C	78.1596	1.09612	87.4595	1.73082	-0.634704	-0.0016864	#N/A	#N/A	#N/A
YGR132C	77.4236	1.06413	76.3072	1.18593	-0.121794	-0.00169505	#N/A	#N/A	#N/A
YKL124W	31.0936	-0.949097	36.5842	-0.754889	-0.194207	-0.00169727	#N/A	#N/A	#N/A
YKL179C	58.3959	0.237299	57.2705	0.255817	-0.0185185	-0.00169807	#N/A	#N/A	#N/A
YGR119C	101.684	2.11836	88.1115	1.76268	0.355688	-0.00169832	#N/A	#N/A	#N/A
YPR074C	86.5457	1.46052	74.5672	1.10092	0.359606	-0.00194843	#N/A	#N/A	#N/A
YBR128C	11.7944	-1.78773	21.3053	-1.5014	-0.286327	-0.00195825	#N/A	#N/A	#N/A
YDR464W	50.2743	-0.115616	53.5284	0.0729847	-0.188601	-0.00219522	#N/A	#N/A	#N/A
YJR094W-A	74.7524	0.948056	80.7362	1.40232	-0.454269	-0.00235673	#N/A	#N/A	#N/A
YOR290C	76.2419	1.01278	68.9771	0.827792	0.184992	-0.00247443	#N/A	#N/A	#N/A
YLR153C	45.8624	-0.307334	42.4914	-0.46627	0.158936	-0.00250245	#N/A	#N/A	#N/A
YKL029C	61.7634	0.38363	62.3996	0.506422	-0.122791	-0.00250366	#N/A	#N/A	#N/A
YOR267C	43.3619	-0.415988	47.2886	-0.231888	-0.1841	-0.00276188	#N/A	#N/A	#N/A
YER008C	75.5803	0.984034	68.4875	0.80387	0.180164	-0.00277793	#N/A	#N/A	#N/A
YER052C	74.6366	0.943026	71.0383	0.928497	0.0145293	-0.0028089	#N/A	#N/A	#N/A
YLR363C	53.2772	0.0148709	52.1881	0.00749817	0.00737276	-0.00292727	#N/A	#N/A	#N/A
YGL155W	58.0122	0.220626	59.8603	0.382351	-0.161726	-0.00294564	#N/A	#N/A	#N/A
YBR230C	10.9595	-1.82401	29.3115	-1.11023	-0.713783	-0.00331227	#N/A	#N/A	#N/A
YNR010W	37.0828	-0.688843	46.3233	-0.279049	-0.409794	-0.00333509	#N/A	#N/A	#N/A
YPL255W	54.7235	0.0777184	60.4275	0.410066	-0.332348	-0.00339529	#N/A	#N/A	#N/A
YML020W	71.3377	0.799676	67.3231	0.746975	0.052701	-0.00375347	#N/A	#N/A	#N/A
YDL188C	46.4544	-0.281608	51.9307	-0.00507761	-0.276531	-0.00385445	#N/A	#N/A	#N/A
YGL130W	61.3161	0.364193	67.8457	0.772509	-0.408316	-0.00397444	#N/A	#N/A	#N/A
YKL203C	49.5035	-0.149112	47.6365	-0.214887	0.065775	-0.0039948	#N/A	#N/A	#N/A
YMR165C	74.6924	0.94545	71.4613	0.949166	-0.00371561	-0.00400163	#N/A	#N/A	#N/A
YPR018W	32.1268	-0.9042	35.5704	-0.804422	-0.0997781	-0.00406497	#N/A	#N/A	#N/A
YNL252C	76.4169	1.02039	76.7055	1.20539	-0.185005	-0.00421371	#N/A	#N/A	#N/A
YBR152W	62.0487	0.39603	60.2075	0.399315	-0.00328467	-0.0044202	#N/A	#N/A	#N/A
YMR117C	48.6396	-0.186651	55.6914	0.178664	-0.365315	-0.00447303	#N/A	#N/A	#N/A
YNL264C	29.6085	-1.01363	36.9258	-0.7382	-0.275431	-0.00462633	#N/A	#N/A	#N/A
YBR007C	37.3863	-0.675655	29.9868	-1.07723	0.401575	-0.00465291	#N/A	#N/A	#N/A
YOR362C	94.853	1.82151	85.2957	1.6251	0.196413	-0.0048805	#N/A	#N/A	#N/A
YNL323W	50.5514	-0.103574	53.179	0.0559114	-0.159486	-0.00490675	#N/A	#N/A	#N/A
YDR348C	55.708	0.120499	50.8093	-0.0598704	0.180369	-0.00498544	#N/A	#N/A	#N/A
YIL147C	27.8259	-1.09109	35.7142	-0.797399	-0.293693	-0.00500807	#N/A	#N/A	#N/A
YDR347W	79.0104	1.13308	70.8739	0.920465	0.21262	-0.00501785	#N/A	#N/A	#N/A
YBR044C	47.9403	-0.217038	58.6567	0.323548	-0.540586	-0.00512398	#N/A	#N/A	#N/A
YJR110W	46.2272	-0.291479	37.5369	-0.708344	0.416865	-0.00529317	#N/A	#N/A	#N/A
YOR046C	69.4426	0.717326	51.9844	-0.00245536	0.719782	-0.00541439	#N/A	#N/A	#N/A
YML030W	62.8081	0.429028	61.9675	0.485309	-0.0562814	-0.00548786	#N/A	#N/A	#N/A
YJL005W	66.1221	0.573036	80.6107	1.39619	-0.823159	-0.00557702	#N/A	#N/A	#N/A
YLR118C	48.6015	-0.188305	44.6196	-0.36229	0.173985	-0.00564439	#N/A	#N/A	#N/A
YFL008W	41.5673	-0.493974	44.2841	-0.378682	-0.115292	-0.00565748	#N/A	#N/A	#N/A
YBR130C	61.9804	0.393062	56.9634	0.240816	0.152247	-0.00578415	#N/A	#N/A	#N/A
YKL192C	91.3095	1.66753	95.7167	2.13425	-0.466721	-0.00588552	#N/A	#N/A	#N/A
YPL139C	36.4081	-0.718159	41.621	-0.508796	-0.209363	-0.00600412	#N/A	#N/A	#N/A
YOL129W	54.1254	0.0517287	53.24	0.0588918	-0.00716311	-0.00610189	#N/A	#N/A	#N/A
YDR458C	63.8204	0.473015	50.6012	-0.0700377	0.543052	-0.00618785	#N/A	#N/A	#N/A
YGL203C	66.0741	0.57095	68.2473	0.792132	-0.221182	-0.00622432	#N/A	#N/A	#N/A
YGL057C	48.9782	-0.171938	45.7595	-0.306594	0.134656	-0.00626536	#N/A	#N/A	#N/A
YML055W	32.7005	-0.87927	43.9031	-0.3973	-0.481971	-0.00628273	#N/A	#N/A	#N/A
YJR001W	49.4319	-0.152222	44.0154	-0.39181	0.239588	-0.00635684	#N/A	#N/A	#N/A
YBL071W-A	58.0625	0.222811	60.5481	0.415957	-0.193146	-0.0063585	#N/A	#N/A	#N/A
YGL082W	59.6562	0.292065	62.7736	0.524696	-0.23263	-0.00637739	#N/A	#N/A	#N/A
YMR089C	79.4661	1.15289	71.8555	0.968425	0.184461	-0.00639879	#N/A	#N/A	#N/A
YDR034C-A	27.0372	-1.12536	23.7959	-1.37971	0.254347	-0.00643175	#N/A	#N/A	#N/A
YER116C	68.287	0.667108	60.9598	0.436076	0.231032	-0.00643702	#N/A	#N/A	#N/A
YML075C	57.3066	0.189967	58.0805	0.295392	-0.105426	-0.00643844	#N/A	#N/A	#N/A
YBR279W	91.7185	1.6853	71.1173	0.932357	0.752947	-0.00645131	#N/A	#N/A	#N/A
YOR176W	52.8998	-0.00152953	54.4849	0.119719	-0.121249	-0.00649443	#N/A	#N/A	#N/A
YDR311W	66.7658	0.601008	62.7269	0.522413	0.0785941	-0.0065488	#N/A	#N/A	#N/A
YEL006W	58.4458	0.239469	63.7761	0.573674	-0.334205	-0.00675717	#N/A	#N/A	#N/A
YHL029C	94.1805	1.79229	96.684	2.18152	-0.389231	-0.00683476	#N/A	#N/A	#N/A
YKR095W	65.2363	0.534545	54.9104	0.140506	0.394039	-0.00685884	#N/A	#N/A	#N/A
YNR052C	91.9818	1.69674	72.4391	0.996941	0.699804	-0.00703477	#N/A	#N/A	#N/A
YCL017C	57.934	0.217229	75.9863	1.17025	-0.953021	-0.00724073	#N/A	#N/A	#N/A
YHL011C	75.3003	0.971866	61.7684	0.475582	0.496284	-0.0073423	#N/A	#N/A	#N/A
YDL206W	17.5222	-1.53883	23.3182	-1.40305	-0.135782	-0.00747288	#N/A	#N/A	#N/A
YLR395C	70.2859	0.753969	76.7125	1.20573	-0.451762	-0.00775036	#N/A	#N/A	#N/A
YDL135C	50.771	-0.0940338	46.218	-0.284196	0.190162	-0.00781907	#N/A	#N/A	#N/A
YBR097W	48.8093	-0.179276	49.8195	-0.108228	-0.0710479	-0.00785654	#N/A	#N/A	#N/A
YPR040W	76.4905	1.02359	75.6114	1.15193	-0.128349	-0.00786823	#N/A	#N/A	#N/A
YDR084C	49.7488	-0.138453	51.929	-0.00515945	-0.133293	-0.00789278	#N/A	#N/A	#N/A
YNL031C	53.3421	0.0176918	47.306	-0.231036	0.248728	-0.00792955	#N/A	#N/A	#N/A
YPL129W	83.2121	1.31566	62.9493	0.533278	0.782387	-0.00798764	#N/A	#N/A	#N/A
YBR251W	61.8101	0.385659	59.7141	0.375208	0.0104513	-0.00802588	#N/A	#N/A	#N/A
YBR127C	77.3743	1.06199	75.6721	1.1549	-0.0929124	-0.00812351	#N/A	#N/A	#N/A
YKR028W	44.9741	-0.345935	24.3094	-1.35462	1.00869	-0.00814065	#N/A	#N/A	#N/A
YLR139C	49.0084	-0.170625	51.7427	-0.0142648	-0.156361	-0.008188	#N/A	#N/A	#N/A
YFR033C	21.0069	-1.38741	21.0327	-1.51472	0.127315	-0.00818822	#N/A	#N/A	#N/A
YIL026C	19.2075	-1.4656	25.0978	-1.31611	-0.149491	-0.00822966	#N/A	#N/A	#N/A
YGR113W	78.2346	1.09937	76.4634	1.19356	-0.0941872	-0.00824438	#N/A	#N/A	#N/A
YJL047C	50.2089	-0.11846	46.8843	-0.251639	0.133179	-0.00835108	#N/A	#N/A	#N/A
YFR041C	52.4573	-0.0207571	49.6302	-0.11748	0.0967228	-0.00853431	#N/A	#N/A	#N/A
YKL184W	61.669	0.37953	65.376	0.651843	-0.272313	-0.00853635	#N/A	#N/A	#N/A
YEL043W	82.4737	1.28358	73.5362	1.05054	0.233037	-0.00854603	#N/A	#N/A	#N/A
YER149C	34.0987	-0.818516	41.8405	-0.498076	-0.32044	-0.00857134	#N/A	#N/A	#N/A
YGR143W	29.1237	-1.0347	30.6504	-1.04481	0.0101132	-0.00867525	#N/A	#N/A	#N/A
YJR134C	32.2298	-0.899727	46.6327	-0.263931	-0.635796	-0.00870375	#N/A	#N/A	#N/A
YML003W	24.4759	-1.23667	13.8268	-1.86679	0.630125	-0.00877218	#N/A	#N/A	#N/A
YPL089C	22.3344	-1.32972	24.927	-1.32445	-0.00527295	-0.00879339	#N/A	#N/A	#N/A
YKR057W	81.429	1.23818	76.2155	1.18145	0.0567321	-0.00889349	#N/A	#N/A	#N/A
YDR500C	99.7473	2.03419	86.7756	1.69741	0.336784	-0.0088963	#N/A	#N/A	#N/A
YNL090W	56.157	0.14001	58.2093	0.301686	-0.161676	-0.00891055	#N/A	#N/A	#N/A
YJL026W	15.1011	-1.64404	14.196	-1.84875	0.204717	-0.00906398	#N/A	#N/A	#N/A
YDL078C	28.1795	-1.07573	40.1509	-0.580626	-0.495102	-0.00907982	#N/A	#N/A	#N/A
YLR295C	95.1811	1.83577	90.3332	1.87123	-0.0354555	-0.0090877	#N/A	#N/A	#N/A
YOL125W	27.6604	-1.09828	22.744	-1.43111	0.332821	-0.00909375	#N/A	#N/A	#N/A
YGL124C	33.9934	-0.823091	31.1245	-1.02164	0.198554	-0.00912018	#N/A	#N/A	#N/A
YJL095W	51.6962	-0.0538318	43.2599	-0.428724	0.374892	-0.00912807	#N/A	#N/A	#N/A
YHR149C	24.7109	-1.22645	32.269	-0.965728	-0.260726	-0.00962116	#N/A	#N/A	#N/A
YBR074W	49.6469	-0.142878	46.3078	-0.279807	0.136928	-0.00972289	#N/A	#N/A	#N/A
YOL100W	25.5371	-1.19055	33.0718	-0.926501	-0.264048	-0.0101139	#N/A	#N/A	#N/A
YDL091C	29.7673	-1.00673	43.3242	-0.425581	-0.581151	-0.0102383	#N/A	#N/A	#N/A
YOR198C	83.0943	1.31055	77.0563	1.22253	0.0880148	-0.0102402	#N/A	#N/A	#N/A
YDL006W	32.2894	-0.897136	25.9003	-1.27689	0.379756	-0.0105572	#N/A	#N/A	#N/A
YBR159W	57.6333	0.204162	48.4128	-0.17696	0.381122	-0.0105705	#N/A	#N/A	#N/A
YER129W	57.3884	0.193518	44.8053	-0.353217	0.546735	-0.0105747	#N/A	#N/A	#N/A
YDR473C	55.0397	0.0914586	55.2944	0.159268	-0.0678094	-0.01074	#N/A	#N/A	#N/A
YOR125C	71.709	0.815809	70.2573	0.890338	-0.0745287	-0.0109131	#N/A	#N/A	#N/A
YJL206C	38.0601	-0.646377	32.0394	-0.976942	0.330566	-0.0109613	#N/A	#N/A	#N/A
YPR133C	87.4758	1.50094	70.4797	0.901208	0.599734	-0.0109779	#N/A	#N/A	#N/A
YDR395W	73.7585	0.904868	75.6752	1.15505	-0.250182	-0.0112295	#N/A	#N/A	#N/A
YNL330C	62.9856	0.436742	65.1283	0.63974	-0.202998	-0.0114186	#N/A	#N/A	#N/A
YHR114W	39.9119	-0.565908	29.4606	-1.10294	0.537031	-0.0114657	#N/A	#N/A	#N/A
YGR117C	65.3153	0.537975	54.2208	0.106814	0.431161	-0.0116072	#N/A	#N/A	#N/A
YNR051C	68.5356	0.677913	68.4622	0.802631	-0.124718	-0.0116593	#N/A	#N/A	#N/A
YJL207C	62.0415	0.395718	57.7764	0.280539	0.115179	-0.0116858	#N/A	#N/A	#N/A
YOR020C	27.8002	-1.09221	24.1	-1.36485	0.272643	-0.0117794	#N/A	#N/A	#N/A
YOL044W	11.038	-1.8206	11.865	-1.96264	0.142046	-0.0118573	#N/A	#N/A	#N/A
YJL127C	59.0507	0.265753	48.6029	-0.167669	0.433422	-0.011947	#N/A	#N/A	#N/A
YJR043C	28.3306	-1.06916	24.2692	-1.35659	0.287425	-0.0119725	#N/A	#N/A	#N/A
YNL225C	57.9402	0.217499	59.8204	0.380406	-0.162907	-0.0120539	#N/A	#N/A	#N/A
YIR005W	27.5712	-1.10216	20.4982	-1.54083	0.438675	-0.0123653	#N/A	#N/A	#N/A
YDL198C	61.1615	0.357475	62.233	0.498282	-0.140807	-0.0123767	#N/A	#N/A	#N/A
YML121W	34.7861	-0.788645	43.7656	-0.404013	-0.384632	-0.0125947	#N/A	#N/A	#N/A
YLR079W	76.5483	1.0261	70.8375	0.918688	0.107409	-0.0127315	#N/A	#N/A	#N/A
YBR049C	52.4612	-0.0205883	48.3342	-0.180796	0.160208	-0.0129475	#N/A	#N/A	#N/A
YOR156C	50.3234	-0.113483	42.8049	-0.450953	0.33747	-0.013183	#N/A	#N/A	#N/A
YGR078C	93.6976	1.77131	89.8598	1.84809	-0.0767871	-0.0133698	#N/A	#N/A	#N/A
YMR172W	35.2749	-0.767402	37.5379	-0.708293	-0.0591092	-0.0137984	#N/A	#N/A	#N/A
YDR267C	65.5905	0.549934	49.2212	-0.137463	0.687397	-0.0139722	#N/A	#N/A	#N/A
YNL288W	80.6162	1.20286	81.6052	1.44479	-0.241923	-0.0139847	#N/A	#N/A	#N/A
YGL176C	8.45924	-1.93265	7.18755	-2.19118	0.258524	-0.0141691	#N/A	#N/A	#N/A
YHR196W	69.7506	0.730709	58.2415	0.303259	0.42745	-0.0142717	#N/A	#N/A	#N/A
YJL208C	51.1796	-0.0762771	43.8118	-0.401758	0.325481	-0.0143764	#N/A	#N/A	#N/A
YPL179W	79.7843	1.16672	66.9827	0.730347	0.436369	-0.0144752	#N/A	#N/A	#N/A
YNL272C	59.7784	0.297374	54.6709	0.128803	0.168571	-0.0146052	#N/A	#N/A	#N/A
YOR114W	7.42019	-1.97781	12.6128	-1.92611	-0.0516982	-0.0146534	#N/A	#N/A	#N/A
YDR182W	69.8534	0.735174	66.3243	0.698175	0.0369995	-0.0148354	#N/A	#N/A	#N/A
YNL238W	63.5329	0.460526	67.5046	0.755847	-0.295322	-0.0151161	#N/A	#N/A	#N/A
YOR232W	73.242	0.882423	75.2152	1.13258	-0.250155	-0.0151718	#N/A	#N/A	#N/A
YIR025W	55.0028	0.0898539	39.1019	-0.631877	0.721731	-0.0151871	#N/A	#N/A	#N/A
YDR229W	72.8572	0.865705	61.1	0.442923	0.422782	-0.015233	#N/A	#N/A	#N/A
YKL110C	18.2261	-1.50824	18.0918	-1.65841	0.150167	-0.0152885	#N/A	#N/A	#N/A
YNL008C	9.17843	-1.9014	21.8371	-1.47542	-0.425987	-0.0153168	#N/A	#N/A	#N/A
YMR092C	72.6858	0.858255	74.4146	1.09346	-0.235204	-0.0153968	#N/A	#N/A	#N/A
YPR022C	62.2849	0.406291	62.1286	0.493178	-0.0868864	-0.0154514	#N/A	#N/A	#N/A
YDR027C	56.1078	0.137872	62.6451	0.518415	-0.380543	-0.0154699	#N/A	#N/A	#N/A
YKL146W	74.463	0.935483	72.6011	1.00486	-0.0693718	-0.0155038	#N/A	#N/A	#N/A
YGR101W	58.6564	0.248619	53.2219	0.0580107	0.190609	-0.0155057	#N/A	#N/A	#N/A
YDL052C	84.9781	1.39241	88.2092	1.76745	-0.375038	-0.0155356	#N/A	#N/A	#N/A
YOR006C	41.1538	-0.51194	33.0427	-0.927924	0.415985	-0.0156324	#N/A	#N/A	#N/A
YOL027C	75.0728	0.961982	64.9086	0.629009	0.332973	-0.0157348	#N/A	#N/A	#N/A
YPL215W	47.9444	-0.216863	41.6795	-0.505941	0.289078	-0.0157814	#N/A	#N/A	#N/A
YJR103W	21.9776	-1.34522	21.1798	-1.50753	0.16231	-0.0158438	#N/A	#N/A	#N/A
YOR210W	60.3347	0.32155	51.8662	-0.00823145	0.329781	-0.0158549	#N/A	#N/A	#N/A
YGL030W	92.614	1.72422	79.1522	1.32494	0.399282	-0.015909	#N/A	#N/A	#N/A
YOR150W	86.3543	1.45221	85.8211	1.65077	-0.198559	-0.015931	#N/A	#N/A	#N/A
YOL022C	54.4569	0.0661355	47.766	-0.208558	0.274694	-0.0166606	#N/A	#N/A	#N/A
YER050C	84.3531	1.36525	68.8978	0.823917	0.541332	-0.0166735	#N/A	#N/A	#N/A
YPR119W	6.54857	-2.01568	35.6454	-0.800757	-1.21492	-0.0166988	#N/A	#N/A	#N/A
YIL135C	84.3487	1.36506	77.8359	1.26062	0.104435	-0.0167169	#N/A	#N/A	#N/A
YKL006C-A	64.2607	0.49215	60.6859	0.422689	0.0694605	-0.0168319	#N/A	#N/A	#N/A
YPL160W	85.0916	1.39734	83.8644	1.55516	-0.157825	-0.0169308	#N/A	#N/A	#N/A
YBL023C	29.7283	-1.00843	30.6697	-1.04387	0.0354412	-0.0169317	#N/A	#N/A	#N/A
YAL016W	96.141	1.87748	81.1707	1.42356	0.453922	-0.0170652	#N/A	#N/A	#N/A
YIR003W	60.3901	0.323958	58.0097	0.291933	0.0320252	-0.0171157	#N/A	#N/A	#N/A
YBR043C	74.4641	0.935529	77.6515	1.25161	-0.316084	-0.0171197	#N/A	#N/A	#N/A
YOR086C	74.4222	0.933709	65.4922	0.657519	0.27619	-0.0171291	#N/A	#N/A	#N/A
YBR273C	58.1708	0.22752	59.4254	0.361106	-0.133586	-0.0171539	#N/A	#N/A	#N/A
YOR213C	27.1535	-1.12031	37.1865	-0.725461	-0.394849	-0.01735	#N/A	#N/A	#N/A
YNL088W	22.0881	-1.34043	14.7015	-1.82405	0.483628	-0.017401	#N/A	#N/A	#N/A
YOL096C	48.0879	-0.210625	53.3702	0.065254	-0.275879	-0.0174502	#N/A	#N/A	#N/A
YLR290C	37.0801	-0.688958	49.1557	-0.14066	-0.548299	-0.0176032	#N/A	#N/A	#N/A
YLR127C	51.8775	-0.045952	38.4424	-0.664099	0.618147	-0.0178782	#N/A	#N/A	#N/A
YPR057W	63.2183	0.446855	62.3186	0.502464	-0.0556094	-0.0179685	#N/A	#N/A	#N/A
YJL008C	70.2967	0.754439	70.1152	0.883394	-0.128955	-0.0181453	#N/A	#N/A	#N/A
YEL020W-A	50.8069	-0.0924723	14.4431	-1.83668	1.74421	-0.0182184	#N/A	#N/A	#N/A
YOR304W	68.4684	0.67499	57.2619	0.255398	0.419592	-0.0182472	#N/A	#N/A	#N/A
YGR027C	84.129	1.35551	81.6485	1.4469	-0.0913905	-0.0182793	#N/A	#N/A	#N/A
YDL047W	78.0135	1.08976	68.5807	0.808424	0.281339	-0.0183724	#N/A	#N/A	#N/A
YOR130C	28.6884	-1.05361	29.6549	-1.09345	0.0398366	-0.0184143	#N/A	#N/A	#N/A
YHR051W	67.085	0.614878	59.8036	0.379583	0.235295	-0.0184795	#N/A	#N/A	#N/A
YER105C	82.8904	1.30169	66.1009	0.68726	0.614429	-0.0185904	#N/A	#N/A	#N/A
YML043C	20.0797	-1.4277	19.5681	-1.58628	0.158582	-0.0186822	#N/A	#N/A	#N/A
YDR244W	67.0267	0.612344	72.095	0.980127	-0.367784	-0.0188448	#N/A	#N/A	#N/A
YLR305C	72.1566	0.835261	63.3418	0.552457	0.282804	-0.0188563	#N/A	#N/A	#N/A
YDR300C	47.793	-0.223441	42.5015	-0.465779	0.242338	-0.018894	#N/A	#N/A	#N/A
YDL049C	7.2277	-1.98617	10.4871	-2.02997	0.0437966	-0.018936	#N/A	#N/A	#N/A
YLL010C	91.4279	1.67268	74.7644	1.11055	0.562129	-0.019273	#N/A	#N/A	#N/A
YLR332W	54.3231	0.0603196	44.4986	-0.368202	0.428522	-0.0192756	#N/A	#N/A	#N/A
YBR236C	67.0592	0.613757	67.9338	0.776816	-0.163059	-0.0193332	#N/A	#N/A	#N/A
YOR241W	66.5107	0.589922	67.3551	0.748542	-0.15862	-0.0194638	#N/A	#N/A	#N/A
YOR144C	19.7733	-1.44101	27.7992	-1.18411	-0.256898	-0.0199725	#N/A	#N/A	#N/A
YLR104W	35.9844	-0.73657	47.2233	-0.235076	-0.501495	-0.0200118	#N/A	#N/A	#N/A
YDR178W	37.6737	-0.663166	42.0569	-0.487499	-0.175668	-0.02003	#N/A	#N/A	#N/A
YPL082C	39.7559	-0.572687	48.3846	-0.178337	-0.39435	-0.0200369	#N/A	#N/A	#N/A
YPR147C	43.6946	-0.40153	35.8207	-0.792193	0.390662	-0.0201663	#N/A	#N/A	#N/A
YML120C	83.944	1.34747	76.2629	1.18377	0.163705	-0.0201945	#N/A	#N/A	#N/A
YOR207C	50.3359	-0.112938	33.1885	-0.920799	0.807861	-0.0202046	#N/A	#N/A	#N/A
YOR336W	25.6913	-1.18385	36.1988	-0.773721	-0.410127	-0.0205113	#N/A	#N/A	#N/A
YDR160W	52.7868	-0.00643984	51.1095	-0.0452003	0.0387604	-0.0206069	#N/A	#N/A	#N/A
YDR117C	50.5592	-0.103236	54.1673	0.104198	-0.207434	-0.0207404	#N/A	#N/A	#N/A
YNL052W	88.2583	1.53495	83.6875	1.54652	-0.0115756	-0.0207464	#N/A	#N/A	#N/A
YMR297W	77.7009	1.07618	78.437	1.28999	-0.213809	-0.0208491	#N/A	#N/A	#N/A
YDL212W	49.4181	-0.152823	52.3156	0.013726	-0.166549	-0.0211266	#N/A	#N/A	#N/A
YGR254W	16.3932	-1.58789	24.7552	-1.33284	-0.255052	-0.0211434	#N/A	#N/A	#N/A
YLR056W	51.8214	-0.0483892	54.9192	0.140934	-0.189324	-0.0211654	#N/A	#N/A	#N/A
YIL048W	69.6968	0.72837	69.0543	0.831562	-0.103192	-0.0211935	#N/A	#N/A	#N/A
YKR071C	60.4482	0.326481	55.0394	0.146809	0.179671	-0.0212814	#N/A	#N/A	#N/A
YOL008W	35.5074	-0.757301	42.1407	-0.483404	-0.273897	-0.0213376	#N/A	#N/A	#N/A
YOR085W	85.6302	1.42074	89.5071	1.83086	-0.410116	-0.0213683	#N/A	#N/A	#N/A
YGR240C	70.7477	0.774038	72.6018	1.00489	-0.23085	-0.0214531	#N/A	#N/A	#N/A
YGL237C	67.8256	0.647058	72.1191	0.981306	-0.334248	-0.021637	#N/A	#N/A	#N/A
YKL094W	58.6162	0.246875	53.0534	0.049777	0.197098	-0.0219481	#N/A	#N/A	#N/A
YDR457W	56.4071	0.15088	59.0635	0.343423	-0.192544	-0.0219497	#N/A	#N/A	#N/A
YHR079C	46.1322	-0.295608	46.9898	-0.246483	-0.0491246	-0.0226831	#N/A	#N/A	#N/A
YER007C-A	68.6166	0.681434	67.8022	0.770384	-0.0889504	-0.0228378	#N/A	#N/A	#N/A
YDR047W	54.9078	0.0857261	63.5675	0.563481	-0.477755	-0.022838	#N/A	#N/A	#N/A
YIL093C	88.2751	1.53568	85.1016	1.61562	-0.0799393	-0.022862	#N/A	#N/A	#N/A
YKL064W	36.0312	-0.734539	37.9677	-0.687295	-0.0472438	-0.0229708	#N/A	#N/A	#N/A
YDR296W	76.759	1.03525	74.7406	1.10939	-0.0741371	-0.0230084	#N/A	#N/A	#N/A
YNL010W	64.8738	0.518791	58.5443	0.318057	0.200734	-0.0231468	#N/A	#N/A	#N/A
YJL124C	64.4006	0.49823	68.4764	0.803329	-0.305098	-0.0231536	#N/A	#N/A	#N/A
YOL142W	62.1245	0.399323	51.134	-0.0440037	0.443327	-0.0232316	#N/A	#N/A	#N/A
YCL034W	99.5418	2.02526	79.8159	1.35736	0.667899	-0.0236981	#N/A	#N/A	#N/A
YBL101C	52.511	-0.0184219	60.3239	0.405006	-0.423428	-0.0237163	#N/A	#N/A	#N/A
YNR018W	81.056	1.22197	83.1855	1.52199	-0.30002	-0.0237522	#N/A	#N/A	#N/A
YAL002W	53.1015	0.00723734	60.2194	0.399899	-0.392662	-0.0238465	#N/A	#N/A	#N/A
YJL125C	56.449	0.152698	59.6334	0.371268	-0.21857	-0.0238492	#N/A	#N/A	#N/A
YBR129C	59.6203	0.290507	56.1398	0.200573	0.089934	-0.0238525	#N/A	#N/A	#N/A
YBR119W	45.325	-0.330684	44.9496	-0.346169	0.0154846	-0.0238695	#N/A	#N/A	#N/A
YMR123W	69.044	0.700005	63.4991	0.560142	0.139863	-0.023964	#N/A	#N/A	#N/A
YDR388W	80.8022	1.21095	89.4904	1.83005	-0.619099	-0.024113	#N/A	#N/A	#N/A
YDR194C	83.7649	1.33969	72.6838	1.00889	0.330794	-0.0241859	#N/A	#N/A	#N/A
YHR071W	5.93424	-2.04238	7.39825	-2.18088	0.138507	-0.0241887	#N/A	#N/A	#N/A
YNL130C	55.3185	0.103573	48.8632	-0.154952	0.258525	-0.0243503	#N/A	#N/A	#N/A
YNL265C	53.1006	0.00719693	59.6745	0.373275	-0.366078	-0.0246092	#N/A	#N/A	#N/A
YDR196C	64.161	0.487816	72.6751	1.00847	-0.520654	-0.0247308	#N/A	#N/A	#N/A
YOL126C	43.834	-0.395476	42.2631	-0.477425	0.0819491	-0.0248937	#N/A	#N/A	#N/A
YLR268W	52.954	0.000825036	53.6252	0.0777142	-0.0768892	-0.0249769	#N/A	#N/A	#N/A
YNL116W	76.6761	1.03165	41.7026	-0.504811	1.53646	-0.0250745	#N/A	#N/A	#N/A
YNR024W	44.2017	-0.379495	44.1111	-0.387133	0.00763816	-0.0252552	#N/A	#N/A	#N/A
YDR310C	58.4701	0.240524	55.9988	0.193686	0.046838	-0.0253081	#N/A	#N/A	#N/A
YPR115W	33.9802	-0.823663	37.1919	-0.725199	-0.098464	-0.0253383	#N/A	#N/A	#N/A
YGR206W	15.5477	-1.62463	17.8546	-1.67	0.0453668	-0.0253941	#N/A	#N/A	#N/A
YBR210W	41.911	-0.479037	43.2201	-0.430669	-0.0483683	-0.0254351	#N/A	#N/A	#N/A
YDR255C	43.5659	-0.407125	48.1354	-0.190509	-0.216615	-0.0254467	#N/A	#N/A	#N/A
YHR005C-A	79.2997	1.14566	67.9573	0.777964	0.367693	-0.0254805	#N/A	#N/A	#N/A
YKR045C	77.5228	1.06844	80.7661	1.40379	-0.335343	-0.0255107	#N/A	#N/A	#N/A
YCL054W	20.2407	-1.4207	19.3924	-1.59486	0.174164	-0.0255131	#N/A	#N/A	#N/A
YLR451W	66.2708	0.579498	59.5791	0.368615	0.210883	-0.0255329	#N/A	#N/A	#N/A
YMR168C	68.9087	0.694126	55.3976	0.164312	0.529814	-0.0255926	#N/A	#N/A	#N/A
YJR122W	47.1632	-0.250805	44.7157	-0.357594	0.106788	-0.0256986	#N/A	#N/A	#N/A
YIL005W	54.8037	0.0812058	48.1498	-0.189807	0.271013	-0.0257651	#N/A	#N/A	#N/A
YLR314C	83.817	1.34195	85.5513	1.63759	-0.295634	-0.0258618	#N/A	#N/A	#N/A
YLR091W	19.5454	-1.45091	28.2646	-1.16137	-0.28954	-0.025958	#N/A	#N/A	#N/A
YGR020C	71.0706	0.788068	71.6279	0.957305	-0.169237	-0.0261959	#N/A	#N/A	#N/A
YGL065C	52.8978	-0.00161339	52.3264	0.0142561	-0.0158695	-0.026234	#N/A	#N/A	#N/A
YCL028W	74.1327	0.921131	79.3321	1.33372	-0.412591	-0.0262991	#N/A	#N/A	#N/A
YDR235W	60.9642	0.348903	57.5272	0.268362	0.080541	-0.0263095	#N/A	#N/A	#N/A
YBR095C	75.6558	0.987314	54.3738	0.114288	0.873026	-0.02632	#N/A	#N/A	#N/A
YDL076C	49.6102	-0.144476	45.506	-0.318984	0.174508	-0.026407	#N/A	#N/A	#N/A
YDL120W	69.3523	0.713399	61.3062	0.452997	0.260402	-0.0264797	#N/A	#N/A	#N/A
YGR082W	78.5631	1.11365	90.3749	1.87326	-0.759615	-0.0265234	#N/A	#N/A	#N/A
YHR208W	87.0989	1.48456	83.5632	1.54045	-0.0558862	-0.0266422	#N/A	#N/A	#N/A
YPR137W	58.5422	0.243658	53.3308	0.0633319	0.180326	-0.0266846	#N/A	#N/A	#N/A
YFL038C	93.5552	1.76512	90.5655	1.88257	-0.117455	-0.0267082	#N/A	#N/A	#N/A
YOR137C	16.1214	-1.5997	26.2741	-1.25863	-0.341071	-0.0268565	#N/A	#N/A	#N/A
YKL149C	41.8872	-0.480072	38.5159	-0.660509	0.180438	-0.026999	#N/A	#N/A	#N/A
YML018C	48.1359	-0.20854	52.455	0.0205366	-0.229077	-0.0270949	#N/A	#N/A	#N/A
YOL063C	68.9462	0.695754	67.4126	0.751352	-0.0555979	-0.0273594	#N/A	#N/A	#N/A
YJL087C	58.6479	0.248252	52.7632	0.0355993	0.212653	-0.027403	#N/A	#N/A	#N/A
YGR217W	74.9359	0.95603	75.7775	1.16005	-0.204017	-0.0278394	#N/A	#N/A	#N/A
YLL048C	44.0674	-0.385331	46.0949	-0.290211	-0.0951203	-0.0278684	#N/A	#N/A	#N/A
YNL071W	95.0858	1.83163	91.0709	1.90727	-0.0756394	-0.0279637	#N/A	#N/A	#N/A
YOR188W	53.7068	0.0335382	64.157	0.592287	-0.558749	-0.0279645	#N/A	#N/A	#N/A
YKR072C	74.5013	0.937144	65.7681	0.671001	0.266143	-0.0279978	#N/A	#N/A	#N/A
YPL068C	22.5218	-1.32158	25.5477	-1.29412	-0.0274599	-0.0280006	#N/A	#N/A	#N/A
YNL298W	49.291	-0.158344	53.8644	0.0894022	-0.247746	-0.0280292	#N/A	#N/A	#N/A
YLR324W	36.3621	-0.720158	36.7608	-0.746264	0.0261068	-0.0280815	#N/A	#N/A	#N/A
YFR037C	101.38	2.10514	84.5698	1.58963	0.515512	-0.0282027	#N/A	#N/A	#N/A
YKL166C	52.2407	-0.0301673	57.1097	0.247963	-0.27813	-0.0283366	#N/A	#N/A	#N/A
YNL057W	32.0556	-0.907294	42.0574	-0.487475	-0.419819	-0.0284728	#N/A	#N/A	#N/A
YJL024C	52.656	-0.0121234	48.2682	-0.184025	0.171902	-0.0287896	#N/A	#N/A	#N/A
YOL148C	81.9135	1.25924	64.6549	0.616614	0.642621	-0.0289264	#N/A	#N/A	#N/A
YDR125C	16.7112	-1.57407	19.6373	-1.5829	0.00882886	-0.0289708	#N/A	#N/A	#N/A
YKL207W	70.6822	0.77119	70.5855	0.906372	-0.135182	-0.028983	#N/A	#N/A	#N/A
YKL068W	75.6869	0.988665	62.0825	0.490929	0.497736	-0.0290488	#N/A	#N/A	#N/A
YER017C	56.6415	0.161064	56.2091	0.203962	-0.042898	-0.0291375	#N/A	#N/A	#N/A
YDR520C	44.2352	-0.378043	43.4083	-0.421473	0.0434303	-0.0292213	#N/A	#N/A	#N/A
YPL087W	30.2002	-0.98792	40.5368	-0.56177	-0.426149	-0.0292688	#N/A	#N/A	#N/A
YLR238W	45.6589	-0.316177	48.9187	-0.152242	-0.163935	-0.0294218	#N/A	#N/A	#N/A
YGL040C	78.4848	1.11025	70.5058	0.902479	0.207766	-0.0295102	#N/A	#N/A	#N/A
YDL230W	28.937	-1.04281	32.8823	-0.935761	-0.107051	-0.0296255	#N/A	#N/A	#N/A
YKL139W	83.1097	1.31122	71.7883	0.965142	0.346074	-0.0296293	#N/A	#N/A	#N/A
YPR100W	79.8473	1.16945	70.198	0.887442	0.28201	-0.0297006	#N/A	#N/A	#N/A
YOL073C	80.8125	1.21139	73.2065	1.03443	0.176962	-0.0297602	#N/A	#N/A	#N/A
YMR197C	82.7073	1.29373	77.2165	1.23036	0.0633743	-0.0299684	#N/A	#N/A	#N/A
YOR030W	56.6741	0.162482	41.4152	-0.518853	0.681335	-0.0300825	#N/A	#N/A	#N/A
YPR065W	29.2692	-1.02837	34.5571	-0.853933	-0.174441	-0.030224	#N/A	#N/A	#N/A
YOR323C	75.6256	0.986	71.8664	0.968957	0.0170432	-0.0303	#N/A	#N/A	#N/A
YHL023C	51.9084	-0.0446089	43.0461	-0.439171	0.394562	-0.030309	#N/A	#N/A	#N/A
YPR113W	91.2949	1.6669	88.2068	1.76733	-0.100435	-0.030318	#N/A	#N/A	#N/A
YDL237W	54.6869	0.0761278	54.9059	0.140285	-0.0641576	-0.0305366	#N/A	#N/A	#N/A
YJR056C	52.2864	-0.0281843	63.2789	0.549382	-0.577566	-0.0306901	#N/A	#N/A	#N/A
YOR308C	34.9252	-0.782597	31.9779	-0.979948	0.197351	-0.0308221	#N/A	#N/A	#N/A
YBR094W	14.7961	-1.65729	18.0364	-1.66112	0.00382465	-0.0309917	#N/A	#N/A	#N/A
YKL020C	93.988	1.78392	85.8911	1.65419	0.129736	-0.0310632	#N/A	#N/A	#N/A
YKL042W	44.1472	-0.381865	38.7453	-0.649302	0.267437	-0.0313366	#N/A	#N/A	#N/A
YBR157C	13.6018	-1.70919	23.2435	-1.4067	-0.302485	-0.031418	#N/A	#N/A	#N/A
YNL206C	43.9526	-0.390321	48.6574	-0.165008	-0.225313	-0.0314478	#N/A	#N/A	#N/A
YLR071C	80.4425	1.19532	76.9036	1.21507	-0.0197553	-0.0316324	#N/A	#N/A	#N/A
YKL198C	55.5806	0.114965	68.6308	0.81087	-0.695905	-0.0316588	#N/A	#N/A	#N/A
YDR141C	71.1836	0.792979	77.213	1.23019	-0.437208	-0.0316747	#N/A	#N/A	#N/A
YCR009C	71.9108	0.82458	66.0035	0.682503	0.142076	-0.0317814	#N/A	#N/A	#N/A
YPL086C	44.9534	-0.346832	37.1463	-0.727428	0.380596	-0.0318766	#N/A	#N/A	#N/A
YBR243C	39.3661	-0.589625	38.9223	-0.640652	0.0510272	-0.0321366	#N/A	#N/A	#N/A
YAL022C	52.6349	-0.0130394	61.286	0.452013	-0.465053	-0.0321491	#N/A	#N/A	#N/A
YDR206W	25.3219	-1.1999	37.0772	-0.730805	-0.469096	-0.0324566	#N/A	#N/A	#N/A
YBL047C	78.6072	1.11556	69.0727	0.832462	0.283102	-0.0326284	#N/A	#N/A	#N/A
YGR257C	79.2161	1.14202	73.3251	1.04023	0.101794	-0.0326529	#N/A	#N/A	#N/A
YDL124W	62.2335	0.404058	73.1919	1.03372	-0.62966	-0.0328876	#N/A	#N/A	#N/A
YGR174C	21.1547	-1.38098	26.3339	-1.25571	-0.125276	-0.0329854	#N/A	#N/A	#N/A
YDR185C	17.4911	-1.54018	23.0389	-1.4167	-0.123484	-0.0331123	#N/A	#N/A	#N/A
YGR281W	18.4243	-1.49963	22.0433	-1.46534	-0.0342862	-0.0331323	#N/A	#N/A	#N/A
YIL118W	74.7117	0.946288	71.6723	0.959475	-0.0131873	-0.0332926	#N/A	#N/A	#N/A
YLR163C	59.8826	0.301903	51.7216	-0.0152925	0.317196	-0.0334417	#N/A	#N/A	#N/A
YGL120C	55.0295	0.0910167	57.1282	0.248868	-0.157851	-0.0335367	#N/A	#N/A	#N/A
YPL140C	20.0607	-1.42852	19.6003	-1.5847	0.156184	-0.0336577	#N/A	#N/A	#N/A
YER171W	54.5669	0.0709142	57.4492	0.264547	-0.193633	-0.0339672	#N/A	#N/A	#N/A
YGR233C	33.531	-0.843184	36.03	-0.781967	-0.0612175	-0.0340911	#N/A	#N/A	#N/A
YBR136W	20.2275	-1.42128	19.2817	-1.60027	0.178997	-0.0343004	#N/A	#N/A	#N/A
YMR309C	83.8124	1.34175	83.986	1.56111	-0.219355	-0.0343285	#N/A	#N/A	#N/A
YPL117C	67.0867	0.61495	70.1132	0.883296	-0.268346	-0.0344309	#N/A	#N/A	#N/A
YML061C	28.9488	-1.0423	27.8931	-1.17953	0.137232	-0.0345415	#N/A	#N/A	#N/A
YPL219W	44.5573	-0.364042	55.8851	0.188132	-0.552174	-0.0345986	#N/A	#N/A	#N/A
YJL041W	67.9312	0.65165	64.2693	0.59777	0.0538802	-0.0348944	#N/A	#N/A	#N/A
YLR319C	68.8897	0.693298	66.4426	0.703955	-0.0106569	-0.0349463	#N/A	#N/A	#N/A
YDR145W	93.4788	1.7618	93.6787	2.03468	-0.272882	-0.0350624	#N/A	#N/A	#N/A
YEL036C	72.1045	0.832995	69.3817	0.847557	-0.0145619	-0.0352334	#N/A	#N/A	#N/A
YDL240W	61.391	0.367449	56.4335	0.214925	0.152524	-0.035337	#N/A	#N/A	#N/A
YHL002W	58.4818	0.241032	55.8715	0.187464	0.0535677	-0.0354357	#N/A	#N/A	#N/A
YDL110C	34.9377	-0.782058	55.4745	0.168069	-0.950127	-0.0357613	#N/A	#N/A	#N/A
YOL128C	36.6757	-0.706533	40.982	-0.54002	-0.166513	-0.0358127	#N/A	#N/A	#N/A
YKR001C	79.0795	1.13609	68.704	0.814445	0.321642	-0.0358754	#N/A	#N/A	#N/A
YGL159W	32.949	-0.868474	29.5216	-1.09996	0.231487	-0.0359135	#N/A	#N/A	#N/A
YNL081C	77.095	1.04985	75.5709	1.14995	-0.100101	-0.0359174	#N/A	#N/A	#N/A
YPR162C	66.0062	0.567998	60.9181	0.434038	0.133961	-0.0360885	#N/A	#N/A	#N/A
YEL038W	9.94498	-1.86809	12.927	-1.91075	0.0426615	-0.0361762	#N/A	#N/A	#N/A
YLL054C	23.185	-1.29276	22.337	-1.45099	0.158235	-0.0361893	#N/A	#N/A	#N/A
YLR388W	102.97	2.17424	92.0223	1.95375	0.220491	-0.0362017	#N/A	#N/A	#N/A
YHL031C	78.0144	1.08981	72.1144	0.981077	0.10873	-0.0363031	#N/A	#N/A	#N/A
YDR234W	35.9714	-0.737138	46.7001	-0.260641	-0.476497	-0.0363949	#N/A	#N/A	#N/A
YDL173W	82.8914	1.30173	83.3793	1.53147	-0.229737	-0.0364526	#N/A	#N/A	#N/A
YIL120W	35.7641	-0.746147	43.8773	-0.398557	-0.34759	-0.0365712	#N/A	#N/A	#N/A
YIL047C	95.0645	1.8307	79.3535	1.33477	0.495936	-0.0366984	#N/A	#N/A	#N/A
YGR093W	32.0102	-0.909268	30.2899	-1.06242	0.153156	-0.0367413	#N/A	#N/A	#N/A
YCR017C	52.9576	0.000984295	50.2436	-0.0875069	0.0884912	-0.0371541	#N/A	#N/A	#N/A
YMR033W	60.3083	0.320403	56.4697	0.216693	0.10371	-0.0371632	#N/A	#N/A	#N/A
YBL045C	65.9601	0.565994	60.5572	0.416403	0.149592	-0.0372157	#N/A	#N/A	#N/A
YJR068W	59.1934	0.271954	58.9788	0.339285	-0.0673306	-0.0372686	#N/A	#N/A	#N/A
YFR013W	68.3207	0.668575	57.3653	0.26045	0.408126	-0.0374791	#N/A	#N/A	#N/A
YNL292W	64.7741	0.514459	50.9446	-0.0532581	0.567717	-0.037492	#N/A	#N/A	#N/A
YDR221W	76.9774	1.04474	65.3147	0.648849	0.395895	-0.0376459	#N/A	#N/A	#N/A
YBR085C-A	12.7843	-1.74471	25.1883	-1.31168	-0.433032	-0.0382057	#N/A	#N/A	#N/A
YBR065C	26.9769	-1.12799	40.5462	-0.561313	-0.566674	-0.0382066	#N/A	#N/A	#N/A
YGL228W	65.9843	0.567047	67.1115	0.736637	-0.16959	-0.0382732	#N/A	#N/A	#N/A
YHL018W	84.2652	1.36143	77.5374	1.24604	0.115391	-0.0383118	#N/A	#N/A	#N/A
YML105C	62.2278	0.403811	63.3122	0.55101	-0.147199	-0.0385044	#N/A	#N/A	#N/A
YCR042C	32.6848	-0.879952	46.3075	-0.279823	-0.600128	-0.0385661	#N/A	#N/A	#N/A
YOR131C	62.9453	0.434992	65.7333	0.669304	-0.234312	-0.0385734	#N/A	#N/A	#N/A
YMR190C	34.6888	-0.792873	37.6054	-0.704998	-0.0878749	-0.0385854	#N/A	#N/A	#N/A
YER118C	29.0411	-1.03829	37.6673	-0.70197	-0.336315	-0.0388681	#N/A	#N/A	#N/A
YJL130C	25.1503	-1.20736	33.4095	-0.910001	-0.297356	-0.0389945	#N/A	#N/A	#N/A
YLR065C	64.4222	0.499168	66.2385	0.693987	-0.194818	-0.0390252	#N/A	#N/A	#N/A
YGL207W	73.4139	0.889895	64.0905	0.589034	0.300861	-0.0391336	#N/A	#N/A	#N/A
YGL202W	73.2142	0.881218	81.7679	1.45273	-0.571516	-0.0391725	#N/A	#N/A	#N/A
YIL122W	13.3695	-1.71928	13.5488	-1.88038	0.161091	-0.0392237	#N/A	#N/A	#N/A
YGR090W	13.7314	-1.70356	11.3513	-1.98774	0.284181	-0.0392598	#N/A	#N/A	#N/A
YBL056W	88.9649	1.56565	87.8748	1.75111	-0.185463	-0.0393265	#N/A	#N/A	#N/A
YOR182C	56.339	0.147917	49.4656	-0.125522	0.27344	-0.039328	#N/A	#N/A	#N/A
YBR160W	60.1994	0.315668	62.1826	0.495818	-0.180151	-0.0394128	#N/A	#N/A	#N/A
[truncated: 1,503 more rows]

## Sheet: Figure 6B
Gene	H3K79me3 Enrichment_D10	H3K79me3_Z-score_D10	H3K79me3 Enrichmen_WT	H3K79me3_Z-score_WT	ΔZ(H3K79me3 Enrichement Difference: Z_D10-Z_WT)	RPKM_log2(d10/wt)	Sub-Telo	Diff up	Diff down
YNR070W	13.3197	-0.393323	18.786	-0.130955	-0.262367	0.357308	1	2	#N/A
YKR103W	18.9642	0.437093	23.5156	0.388911	0.0481815	0.493526	1	#N/A	#N/A
YCR106W	17.6933	0.250116	15.4136	-0.50164	0.751756	0.203528	1	#N/A	#N/A
YCR100C	13.8143	-0.320564	12.4911	-0.822883	0.50232	-0.00691525	1	#N/A	#N/A
YPL128C	17.6367	0.241795	27.5199	0.829049	-0.587254	-0.0755835	1	#N/A	#N/A
YBR298C	4.6365	-1.67079	7.64187	-1.35589	-0.314894	-0.39842	1	#N/A	#N/A
YHR177W	7.52492	-1.24585	6.37648	-1.49498	0.249138	1.22286	#N/A	2	#N/A
YNR062C	12.6895	-0.486041	16.5464	-0.377125	-0.108916	0.959494	#N/A	2	#N/A
YPR194C	9.54705	-0.948351	13.1869	-0.746393	-0.201958	0.830484	#N/A	2	#N/A
YMR316C-B	19.9137	0.576776	6.63528	-1.46654	2.04331	0.698408	#N/A	2	#N/A
YNR044W	12.6659	-0.489504	20.3886	0.0451976	-0.534702	0.639809	#N/A	2	#N/A
YBL084C	11.6825	-0.63418	22.5262	0.280159	-0.914339	-0.625238	#N/A	#N/A	3
YOR385W	19.6729	0.541355	8.71435	-1.23801	1.77937	-0.671742	#N/A	#N/A	3
YPL274W	7.6877	-1.2219	8.07402	-1.30839	0.0864962	-0.726873	#N/A	#N/A	3
YGL035C	11.8142	-0.614811	16.1373	-0.422097	-0.192713	-0.77636	#N/A	#N/A	3
YHR160C	15.7122	-0.0413328	19.5131	-0.0510343	0.00970144	-1.46051	#N/A	#N/A	3
YML123C	21.3705	0.791111	25.2722	0.581987	0.209123	-2.45171	#N/A	#N/A	3
YCL046W	28.6807	1.86657	34.3871	1.58388	0.282695	2.91919	#N/A	#N/A	#N/A
YLR322W	17.3513	0.199806	22.7179	0.301228	-0.101423	2.68199	#N/A	#N/A	#N/A
YOR139C	17.747	0.258014	25.401	0.596148	-0.338134	2.31878	#N/A	#N/A	#N/A
YAL047W-A	14.901	-0.16068	13.287	-0.735399	0.57472	2.24599	#N/A	#N/A	#N/A
YHL005C	9.87232	-0.900498	11.2587	-0.958341	0.0578429	2.22832	#N/A	#N/A	#N/A
YCR038W-A	13.4669	-0.371669	14.5421	-0.597436	0.225767	2.02836	#N/A	#N/A	#N/A
YDR360W	28.7792	1.88107	38.299	2.01387	-0.132796	2.00104	#N/A	#N/A	#N/A
YAL016C-A	24.8078	1.29679	32.403	1.36579	-0.0690022	1.96629	#N/A	#N/A	#N/A
YER119C-A	11.546	-0.654274	17.1651	-0.309127	-0.345147	1.91664	#N/A	#N/A	#N/A
YNL103W-A	12.9734	-0.444273	13.2272	-0.741969	0.297696	1.79204	#N/A	#N/A	#N/A
YDR053W	23.2056	1.06108	27.4041	0.816323	0.244754	1.70582	#N/A	#N/A	#N/A
YLR347W-A	17.1618	0.171923	31.1201	1.22478	-1.05286	1.65984	#N/A	#N/A	#N/A
YDR193W	8.83557	-1.05302	8.51968	-1.25941	0.206383	1.59536	#N/A	#N/A	#N/A
YJL175W	24.1473	1.19963	31.5208	1.26883	-0.0691986	1.49599	#N/A	#N/A	#N/A
YDL026W	9.60013	-0.940542	15.4118	-0.501839	-0.438703	1.42856	#N/A	#N/A	#N/A
YBL062W	14.2677	-0.25385	21.8628	0.207235	-0.461086	1.37757	#N/A	#N/A	#N/A
YHR056W-A	27.1454	1.6407	27.3797	0.813645	0.827051	1.35828	#N/A	#N/A	#N/A
YNL174W	6.97596	-1.32661	7.86565	-1.3313	0.00468859	1.33422	#N/A	#N/A	#N/A
YGL217C	24.0413	1.18403	33.1688	1.44997	-0.265937	1.33422	#N/A	#N/A	#N/A
YML034C-A	28.3052	1.81133	35.4482	1.70051	0.110815	1.31585	#N/A	#N/A	#N/A
YOR333C	10.9224	-0.746017	16.7006	-0.360183	-0.385835	1.276	#N/A	#N/A	#N/A
YJR071W	9.19688	-0.999869	11.4757	-0.934489	-0.0653796	1.22417	#N/A	#N/A	#N/A
YPL044C	27.5628	1.7021	30.6234	1.17018	0.531923	1.18597	#N/A	#N/A	#N/A
YGL192W	24.9906	1.32369	31.9173	1.3124	0.0112848	1.18597	#N/A	#N/A	#N/A
YHL006W-A	22.3044	0.928496	29.7143	1.07026	-0.141762	1.12796	#N/A	#N/A	#N/A
YPR177C	10.0849	-0.869225	11.4067	-0.942071	0.0728458	1.11454	#N/A	#N/A	#N/A
YBR124W	24.8059	1.29652	29.9009	1.09077	0.205757	1.05646	#N/A	#N/A	#N/A
YOR041C	5.94287	-1.4786	7.44588	-1.37744	-0.101159	1.01607	#N/A	#N/A	#N/A
YBR178W	11.1864	-0.707165	13.0768	-0.758503	0.0513384	0.969481	#N/A	#N/A	#N/A
YPL102C	12.9251	-0.451373	14.6145	-0.58948	0.138107	0.884806	#N/A	#N/A	#N/A
YOR325W	17.5255	0.225431	23.6669	0.405543	-0.180112	0.832408	#N/A	#N/A	#N/A
YDL163W	9.84454	-0.904585	13.2273	-0.74196	-0.162624	0.832408	#N/A	#N/A	#N/A
YGR115C	26.0571	1.48059	37.8744	1.96719	-0.486602	0.832408	#N/A	#N/A	#N/A
YHR079C-A	12.216	-0.555697	26.3919	0.705062	-1.26076	0.704626	#N/A	#N/A	#N/A
YOR049C	7.92297	-1.18728	10.3204	-1.06148	-0.125806	0.700963	#N/A	#N/A	#N/A
YML057C-A	14.718	-0.187603	18.5762	-0.154018	-0.0335853	0.672868	#N/A	#N/A	#N/A
YJL169W	25.3139	1.37125	32.0753	1.32977	0.0414733	0.655727	#N/A	#N/A	#N/A
YKL125W	18.8211	0.41604	22.1141	0.234863	0.181177	0.65129	#N/A	#N/A	#N/A
YLR374C	6.16232	-1.44631	7.78479	-1.34018	-0.106126	0.594797	#N/A	#N/A	#N/A
YHL002C-A	11.9197	-0.599293	12.991	-0.767927	0.168634	0.575839	#N/A	#N/A	#N/A
YGR242W	14.912	-0.159061	24.7279	0.52216	-0.681221	0.567042	#N/A	#N/A	#N/A
YJL157C	9.33923	-0.978925	8.77018	-1.23187	0.252948	0.512337	#N/A	#N/A	#N/A
YDL071C	14.301	-0.248953	17.7092	-0.249315	0.000362093	0.501584	#N/A	#N/A	#N/A
YDR107C	4.70162	-1.66121	6.35937	-1.49686	-0.164343	0.497097	#N/A	#N/A	#N/A
YGL218W	23.1014	1.04575	28.4296	0.929041	0.116707	0.484868	#N/A	#N/A	#N/A
YCR081C-A	11.4786	-0.664183	12.0444	-0.871973	0.20779	0.462167	#N/A	#N/A	#N/A
YGR190C	14.3205	-0.246088	21.1453	0.128373	-0.374461	0.458857	#N/A	#N/A	#N/A
YJR054W	15.312	-0.10022	15.1303	-0.532784	0.432564	0.454365	#N/A	#N/A	#N/A
YDR048C	22.3233	0.931281	13.8139	-0.677479	1.60876	0.448573	#N/A	#N/A	#N/A
YLR130C	6.65149	-1.37434	14.1839	-0.636805	-0.737538	0.43946	#N/A	#N/A	#N/A
YPL238C	15.0678	-0.136148	16.7722	-0.352313	0.216165	0.434072	#N/A	#N/A	#N/A
YIL079C	13.8364	-0.317308	23.9034	0.431536	-0.748844	0.418767	#N/A	#N/A	#N/A
YHR124W	9.66689	-0.930721	11.9252	-0.885085	-0.0456357	0.414136	#N/A	#N/A	#N/A
YML126C	13.8394	-0.316869	17.5551	-0.266253	-0.0506155	0.412158	#N/A	#N/A	#N/A
YHR030C	11.6365	-0.640952	10.1824	-1.07664	0.435693	0.4101	#N/A	#N/A	#N/A
YOR068C	22.009	0.885043	26.7593	0.745455	0.139588	0.408362	#N/A	#N/A	#N/A
YOR287C	11.498	-0.661331	10.8053	-1.00818	0.346849	0.408297	#N/A	#N/A	#N/A
YJL020W-A	24.236	1.21267	34.4692	1.5929	-0.380235	0.406599	#N/A	#N/A	#N/A
YGL024W	13.8521	-0.315002	16.5411	-0.377712	0.0627107	0.399577	#N/A	#N/A	#N/A
YLR452C	10.9857	-0.736704	12.7276	-0.796886	0.0601823	0.395494	#N/A	#N/A	#N/A
YGR022C	9.56816	-0.945245	7.52535	-1.3687	0.423456	0.392242	#N/A	#N/A	#N/A
YEL023C	12.6292	-0.494907	13.8229	-0.676485	0.181578	0.391784	#N/A	#N/A	#N/A
YCR065W	10.573	-0.797417	19.2483	-0.0801372	-0.71728	0.386587	#N/A	#N/A	#N/A
YJL212C	12.1355	-0.567538	8.75864	-1.23314	0.665603	0.384724	#N/A	#N/A	#N/A
YCR089W	10.8285	-0.75982	8.80781	-1.22774	0.467917	0.380505	#N/A	#N/A	#N/A
YER064C	6.81544	-1.35022	6.11543	-1.52368	0.173452	0.373849	#N/A	#N/A	#N/A
YNL065W	11.0703	-0.724253	13.6956	-0.690481	-0.0337723	0.373529	#N/A	#N/A	#N/A
YGR073C	11.886	-0.604254	13.201	-0.744851	0.140597	0.362249	#N/A	#N/A	#N/A
YGL064C	10.157	-0.858619	10.8097	-1.0077	0.149079	0.344858	#N/A	#N/A	#N/A
YNL191W	8.87902	-1.04663	4.31543	-1.72153	0.674897	0.343118	#N/A	#N/A	#N/A
YNL266W	20.0405	0.595435	22.5741	0.285424	0.310011	0.339484	#N/A	#N/A	#N/A
YLL032C	27.5095	1.69427	32.4762	1.37384	0.32043	0.338855	#N/A	#N/A	#N/A
YMR192W	13.4921	-0.367959	17.7286	-0.247186	-0.120773	0.337609	#N/A	#N/A	#N/A
YJR004C	10.7682	-0.768694	10.7578	-1.0134	0.244704	0.334105	#N/A	#N/A	#N/A
YLR432W	11.75	-0.62426	12.1042	-0.86541	0.241149	0.332799	#N/A	#N/A	#N/A
YGR065C	9.41997	-0.967047	9.9734	-1.09962	0.13257	0.32904	#N/A	#N/A	#N/A
YDR046C	8.06393	-1.16655	10.4741	-1.04458	-0.121962	0.327659	#N/A	#N/A	#N/A
YOL112W	10.3673	-0.827672	15.4577	-0.496794	-0.330878	0.323243	#N/A	#N/A	#N/A
YCR054C	6.81386	-1.35046	10.1962	-1.07513	-0.275328	0.323086	#N/A	#N/A	#N/A
YPR121W	13.2914	-0.397483	13.2183	-0.742945	0.345462	0.318214	#N/A	#N/A	#N/A
YMR289W	6.27968	-1.42904	5.46187	-1.59551	0.166471	0.31715	#N/A	#N/A	#N/A
YMR015C	11.3726	-0.679784	12.9126	-0.776553	0.0967683	0.312152	#N/A	#N/A	#N/A
YJL006C	13.6557	-0.343894	10.7776	-1.01122	0.66733	0.310461	#N/A	#N/A	#N/A
YGL009C	15.4116	-0.0855635	13.69	-0.691094	0.60553	0.302507	#N/A	#N/A	#N/A
YMR278W	25.0569	1.33344	33.7791	1.51705	-0.183605	0.302256	#N/A	#N/A	#N/A
YKR069W	16.5447	0.0811417	16.4043	-0.392751	0.473893	0.299025	#N/A	#N/A	#N/A
YLL014W	10.192	-0.853466	11.5237	-0.929212	0.0757465	0.295269	#N/A	#N/A	#N/A
YGL209W	7.41006	-1.26274	7.28183	-1.39547	0.132726	0.294371	#N/A	#N/A	#N/A
YBR156C	16.3315	0.0497663	23.386	0.374663	-0.324897	0.294313	#N/A	#N/A	#N/A
YAL064W-B	10.9129	-0.747405	9.59256	-1.14148	0.394074	0.292581	#N/A	#N/A	#N/A
YOR128C	13.4881	-0.368552	25.0019	0.552285	-0.920837	0.292464	#N/A	#N/A	#N/A
YCL014W	29.7416	2.02265	32.3488	1.35983	0.662821	0.291006	#N/A	#N/A	#N/A
YAL064C-A	14.5551	-0.211574	18.7736	-0.132318	-0.0792561	0.290226	#N/A	#N/A	#N/A
YER132C	20.3463	0.64042	23.9774	0.439671	0.200749	0.289664	#N/A	#N/A	#N/A
YMR179W	7.53424	-1.24447	9.40821	-1.16174	-0.0827318	0.289605	#N/A	#N/A	#N/A
YFL047W	19.7996	0.559998	25.432	0.599553	-0.0395549	0.288237	#N/A	#N/A	#N/A
YOR092W	20.8962	0.721332	18.5675	-0.154975	0.876307	0.286015	#N/A	#N/A	#N/A
YDL094C	6.32843	-1.42187	8.22991	-1.29126	-0.130613	0.285117	#N/A	#N/A	#N/A
YDR097C	5.85111	-1.4921	9.51905	-1.14956	-0.342536	0.283582	#N/A	#N/A	#N/A
YLR223C	15.0645	-0.136627	34.6418	1.61188	-1.74851	0.283577	#N/A	#N/A	#N/A
YLR225C	13.946	-0.301183	18.2605	-0.188714	-0.112468	0.283202	#N/A	#N/A	#N/A
YFL023W	22.2888	0.926197	27.6281	0.840945	0.0852525	0.283058	#N/A	#N/A	#N/A
YGR173W	20.5477	0.670048	23.4139	0.377735	0.292313	0.280588	#N/A	#N/A	#N/A
YDL175C	9.20051	-0.999334	18.2865	-0.185857	-0.813477	0.277008	#N/A	#N/A	#N/A
YGR208W	9.58894	-0.942188	5.83565	-1.55443	0.612242	0.275267	#N/A	#N/A	#N/A
YDL211C	7.51693	-1.24702	9.74831	-1.12436	-0.122662	0.270058	#N/A	#N/A	#N/A
YGR014W	26.6568	1.56882	29.5823	1.05575	0.513073	0.26856	#N/A	#N/A	#N/A
YGL016W	8.97453	-1.03258	5.74424	-1.56448	0.531898	0.268255	#N/A	#N/A	#N/A
YGL021W	20.5232	0.666448	27.9462	0.875908	-0.20946	0.263812	#N/A	#N/A	#N/A
YLR342W	15.4589	-0.0786011	20.2386	0.028711	-0.107312	0.262943	#N/A	#N/A	#N/A
YPR092W	16.9406	0.139375	24.0717	0.450034	-0.310659	0.261565	#N/A	#N/A	#N/A
YPR186C	13.2233	-0.4075	16.7091	-0.359242	-0.048258	0.259858	#N/A	#N/A	#N/A
YLR093C	12.0463	-0.580668	16.6506	-0.365679	-0.214989	0.259146	#N/A	#N/A	#N/A
YBL097W	29.5392	1.99288	34.3151	1.57597	0.416906	0.257054	#N/A	#N/A	#N/A
YIL091C	22.2726	0.923828	30.1287	1.11581	-0.191978	0.256312	#N/A	#N/A	#N/A
YMR208W	16.6536	0.0971607	15.1939	-0.525791	0.622952	0.255892	#N/A	#N/A	#N/A
YER077C	21.6789	0.836478	18.6291	-0.148204	0.984682	0.252816	#N/A	#N/A	#N/A
YOR359W	20.9103	0.723393	28.2332	0.907459	-0.184066	0.251822	#N/A	#N/A	#N/A
YMR186W	6.74667	-1.36034	8.02514	-1.31377	-0.0465748	0.250325	#N/A	#N/A	#N/A
YLR086W	26.3636	1.52568	27.9068	0.87158	0.654105	0.249364	#N/A	#N/A	#N/A
YOR377W	19.2822	0.483871	25.5849	0.61636	-0.132489	0.248732	#N/A	#N/A	#N/A
YIL094C	12.2821	-0.545973	13.0131	-0.765502	0.219529	0.239362	#N/A	#N/A	#N/A
YLR318W	16.6342	0.0943044	8.78433	-1.23032	1.32462	0.236852	#N/A	#N/A	#N/A
YKL175W	19.5303	0.520378	25.2068	0.574801	-0.0544232	0.235714	#N/A	#N/A	#N/A
YDR410C	22.2194	0.915993	27.9415	0.875397	0.0405957	0.233425	#N/A	#N/A	#N/A
YOL076W	27.7197	1.72519	34.2441	1.56816	0.157032	0.232054	#N/A	#N/A	#N/A
YNL164C	12.1903	-0.559474	15.0168	-0.545263	-0.0142107	0.23099	#N/A	#N/A	#N/A
YCR014C	9.66896	-0.930417	5.10148	-1.63513	0.704711	0.229272	#N/A	#N/A	#N/A
YOR025W	12.9207	-0.452028	8.56297	-1.25465	0.802621	0.229182	#N/A	#N/A	#N/A
YMR299C	6.94653	-1.33094	9.02316	-1.20407	-0.126871	0.22908	#N/A	#N/A	#N/A
YGL177W	26.3407	1.52231	27.7651	0.856009	0.666306	0.228371	#N/A	#N/A	#N/A
YDR499W	11.4394	-0.669954	14.6425	-0.586403	-0.0835511	0.226624	#N/A	#N/A	#N/A
YLR338W	16.1427	0.0219968	24.58	0.505909	-0.483912	0.226411	#N/A	#N/A	#N/A
YIL002C	17.2255	0.181291	18.5965	-0.151791	0.333082	0.225731	#N/A	#N/A	#N/A
YHL038C	13.3867	-0.383461	18.1193	-0.204238	-0.179223	0.223327	#N/A	#N/A	#N/A
YDL239C	14.5457	-0.212961	18.2809	-0.18648	-0.0264815	0.221356	#N/A	#N/A	#N/A
YPR122W	22.9216	1.0193	23.5675	0.394619	0.624683	0.220341	#N/A	#N/A	#N/A
YLL004W	15.8729	-0.017704	21.3667	0.152709	-0.170413	0.219171	#N/A	#N/A	#N/A
YKL033W	16.873	0.129436	17.2837	-0.296081	0.425518	0.218769	#N/A	#N/A	#N/A
YDR528W	5.05472	-1.60926	4.57397	-1.69311	0.0838513	0.21843	#N/A	#N/A	#N/A
YNL299W	16.9687	0.143521	21.7011	0.18946	-0.0459387	0.21742	#N/A	#N/A	#N/A
YNL329C	22.9306	1.02063	29.4762	1.04409	-0.023463	0.216543	#N/A	#N/A	#N/A
YGR084C	12.2719	-0.54747	15.1824	-0.527061	-0.0204089	0.216488	#N/A	#N/A	#N/A
YDL176W	18.7319	0.402913	22.6973	0.298967	0.103945	0.215127	#N/A	#N/A	#N/A
YKL147C	9.22391	-0.995892	14.2011	-0.634919	-0.360973	0.214451	#N/A	#N/A	#N/A
YCL057W	19.7667	0.555149	23.6711	0.406004	0.149146	0.21387	#N/A	#N/A	#N/A
YNL261W	6.02691	-1.46623	11.7777	-0.901299	-0.564933	0.211804	#N/A	#N/A	#N/A
YJL099W	4.03488	-1.7593	7.05072	-1.42087	-0.338425	0.210209	#N/A	#N/A	#N/A
YDL096C	19.2793	0.483445	26.8865	0.759426	-0.275981	0.20659	#N/A	#N/A	#N/A
YER041W	6.41087	-1.40974	6.05775	-1.53002	0.120275	0.206178	#N/A	#N/A	#N/A
YNL123W	24.7585	1.28955	32.0755	1.32979	-0.040246	0.206039	#N/A	#N/A	#N/A
YGL027C	11.859	-0.608226	14.1953	-0.635556	0.0273294	0.205109	#N/A	#N/A	#N/A
YMR030W-A	16.8434	0.125084	21.8401	0.204738	-0.0796542	0.204584	#N/A	#N/A	#N/A
YNL180C	11.4383	-0.670107	4.85346	-1.66239	0.992283	0.201794	#N/A	#N/A	#N/A
YKR086W	17.5625	0.230879	22.107	0.234075	-0.00319641	0.200001	#N/A	#N/A	#N/A
YGR140W	23.429	1.09395	24.7338	0.522809	0.571142	0.198945	#N/A	#N/A	#N/A
YDR109C	6.04207	-1.464	9.89935	-1.10776	-0.356244	0.198793	#N/A	#N/A	#N/A
YOR047C	21.311	0.782351	23.4044	0.376682	0.405669	0.198326	#N/A	#N/A	#N/A
YOR355W	15.1752	-0.120341	20.9459	0.106459	-0.2268	0.196696	#N/A	#N/A	#N/A
YPR159W	24.0264	1.18184	32.3753	1.36275	-0.180908	0.195374	#N/A	#N/A	#N/A
YCR023C	19.726	0.549173	22.4491	0.271677	0.277495	0.194536	#N/A	#N/A	#N/A
YOL011W	12.3191	-0.540526	13.9269	-0.665059	0.124532	0.194425	#N/A	#N/A	#N/A
YDR299W	23.4591	1.09838	29.4095	1.03675	0.0616218	0.19441	#N/A	#N/A	#N/A
YLR420W	6.65826	-1.37335	7.52109	-1.36917	-0.00417756	0.194004	#N/A	#N/A	#N/A
YOL075C	4.02144	-1.76127	6.5467	-1.47627	-0.285001	0.19292	#N/A	#N/A	#N/A
YOR175C	19.7442	0.551852	19.4165	-0.0616529	0.613504	0.192659	#N/A	#N/A	#N/A
YPL029W	16.8558	0.126899	16.5246	-0.379528	0.506428	0.192553	#N/A	#N/A	#N/A
YIL138C	11.9489	-0.594997	10.6229	-1.02823	0.433229	0.19031	#N/A	#N/A	#N/A
YPL242C	26.1186	1.48964	30.3341	1.13838	0.351255	0.190098	#N/A	#N/A	#N/A
YOR373W	28.8011	1.88429	32.1015	1.33266	0.551629	0.189558	#N/A	#N/A	#N/A
YJR111C	7.28355	-1.28135	7.07355	-1.41836	0.137008	0.189417	#N/A	#N/A	#N/A
YML069W	25.2674	1.36441	35.5546	1.71221	-0.347792	0.189109	#N/A	#N/A	#N/A
YPR164W	26.668	1.57046	29.7113	1.06992	0.500542	0.188994	#N/A	#N/A	#N/A
YOR329W-A	25.1534	1.34764	29.5983	1.0575	0.290137	0.185971	#N/A	#N/A	#N/A
YOL054W	12.3231	-0.539939	9.6099	-1.13957	0.599633	0.183116	#N/A	#N/A	#N/A
YLR088W	10.3469	-0.83068	14.3562	-0.617867	-0.212813	0.182942	#N/A	#N/A	#N/A
YBR192W	10.3196	-0.834699	18.3351	-0.180521	-0.654178	0.182697	#N/A	#N/A	#N/A
YJL193W	6.42005	-1.40839	4.43522	-1.70836	0.29997	0.182527	#N/A	#N/A	#N/A
YML111W	22.9236	1.01959	27.7864	0.858346	0.161249	0.18018	#N/A	#N/A	#N/A
YOR153W	21.9814	0.880987	29.3559	1.03086	-0.149871	0.179859	#N/A	#N/A	#N/A
YAL012W	14.2224	-0.260513	14.8414	-0.564535	0.304022	0.178436	#N/A	#N/A	#N/A
YNR030W	8.21737	-1.14397	14.3131	-0.622607	-0.521366	0.177756	#N/A	#N/A	#N/A
YOL018C	17.0008	0.148231	21.3809	0.154271	-0.00603962	0.177599	#N/A	#N/A	#N/A
YNL219C	18.9362	0.43297	26.6461	0.733002	-0.300032	0.177514	#N/A	#N/A	#N/A
YGL116W	10.229	-0.848017	7.47568	-1.37416	0.526145	0.177447	#N/A	#N/A	#N/A
YOL056W	10.3729	-0.826846	12.3175	-0.841962	0.0151163	0.177237	#N/A	#N/A	#N/A
YJR016C	11.652	-0.638679	11.6476	-0.915593	0.276915	0.175074	#N/A	#N/A	#N/A
YGR010W	12.4383	-0.522999	9.94522	-1.10272	0.579716	0.175033	#N/A	#N/A	#N/A
YGR227W	12.8012	-0.469604	13.4158	-0.721239	0.251635	0.174865	#N/A	#N/A	#N/A
YGR276C	13.1114	-0.423965	10.0888	-1.08693	0.662964	0.173598	#N/A	#N/A	#N/A
YLR032W	5.41711	-1.55594	11.8626	-0.891961	-0.663983	0.172118	#N/A	#N/A	#N/A
YMR267W	7.27304	-1.2829	7.40104	-1.38237	0.0994649	0.171421	#N/A	#N/A	#N/A
YDR162C	3.70908	-1.80723	4.42056	-1.70997	-0.0972549	0.171061	#N/A	#N/A	#N/A
YDR420W	28.632	1.85941	36.2931	1.79338	0.0660301	0.170155	#N/A	#N/A	#N/A
YOR080W	5.95223	-1.47722	8.94146	-1.21305	-0.264171	0.169621	#N/A	#N/A	#N/A
YNL041C	25.5775	1.41004	27.911	0.872046	0.537992	0.168493	#N/A	#N/A	#N/A
YPR105C	27.0144	1.62144	26.9869	0.77047	0.850965	0.167961	#N/A	#N/A	#N/A
YNR065C	15.4575	-0.0788136	16.627	-0.368269	0.289455	0.165828	#N/A	#N/A	#N/A
YOR221C	9.03993	-1.02296	6.85635	-1.44224	0.419278	0.165378	#N/A	#N/A	#N/A
YDR439W	6.60722	-1.38086	6.02435	-1.53369	0.152831	0.164943	#N/A	#N/A	#N/A
YBR229C	17.9262	0.284377	24.7299	0.522381	-0.238003	0.16469	#N/A	#N/A	#N/A
YHR023W	28.0618	1.77553	36.0622	1.768	0.00752679	0.164443	#N/A	#N/A	#N/A
YBR138C	13.9102	-0.306444	9.61686	-1.13881	0.832364	0.164008	#N/A	#N/A	#N/A
YKR024C	13.9292	-0.303646	19.4308	-0.060086	-0.24356	0.163823	#N/A	#N/A	#N/A
YGR155W	5.53523	-1.53857	6.98055	-1.42859	-0.109981	0.16264	#N/A	#N/A	#N/A
YJR136C	8.12069	-1.1582	7.42052	-1.38022	0.222029	0.161428	#N/A	#N/A	#N/A
YPR094W	6.25615	-1.43251	10.0671	-1.08932	-0.343185	0.161022	#N/A	#N/A	#N/A
YFR022W	8.8952	-1.04425	11.3534	-0.947932	-0.0963188	0.160781	#N/A	#N/A	#N/A
YMR301C	13.5128	-0.364907	12.162	-0.859052	0.494145	0.160363	#N/A	#N/A	#N/A
YGL145W	14.1934	-0.264783	20.5619	0.0642447	-0.329028	0.160169	#N/A	#N/A	#N/A
YDR144C	16.5064	0.075504	18.609	-0.150411	0.225915	0.159161	#N/A	#N/A	#N/A
YML097C	17.6686	0.246485	16.6746	-0.363033	0.609518	0.158768	#N/A	#N/A	#N/A
YJR040W	8.73293	-1.06812	9.17612	-1.18725	0.11913	0.158763	#N/A	#N/A	#N/A
YKL202W	25.2813	1.36646	33.0098	1.4325	-0.066039	0.15871	#N/A	#N/A	#N/A
YDR128W	23.8994	1.16316	29.9725	1.09864	0.0645152	0.158604	#N/A	#N/A	#N/A
YHR047C	5.37509	-1.56213	4.99422	-1.64692	0.0847922	0.157776	#N/A	#N/A	#N/A
YDR217C	19.1088	0.458361	18.7172	-0.138522	0.596883	0.15733	#N/A	#N/A	#N/A
YMR220W	6.90391	-1.33721	8.37704	-1.27509	-0.0621216	0.156899	#N/A	#N/A	#N/A
YNL221C	24.901	1.31051	29.672	1.06561	0.244901	0.156842	#N/A	#N/A	#N/A
YCR072C	16.2732	0.0411959	24.1685	0.460674	-0.419478	0.15629	#N/A	#N/A	#N/A
YER075C	22.9442	1.02262	23.5811	0.39611	0.626511	0.155959	#N/A	#N/A	#N/A
YLL001W	15.58	-0.0607923	14.0834	-0.647855	0.587063	0.155588	#N/A	#N/A	#N/A
YNR068C	15.7003	-0.0430931	15.3716	-0.506265	0.463172	0.152568	#N/A	#N/A	#N/A
YHR164C	21.0483	0.743699	23.644	0.403027	0.340672	0.152444	#N/A	#N/A	#N/A
YGL038C	11.028	-0.730482	17.3289	-0.291119	-0.439362	0.151776	#N/A	#N/A	#N/A
YLL034C	22.4565	0.95087	30.4784	1.15425	-0.203378	0.151554	#N/A	#N/A	#N/A
YLR210W	13.1413	-0.41957	13.062	-0.760124	0.340554	0.151525	#N/A	#N/A	#N/A
YBR115C	23.0012	1.03101	34.4002	1.58532	-0.554306	0.150234	#N/A	#N/A	#N/A
YGR199W	25.1935	1.35354	29.1197	1.0049	0.34864	0.150153	#N/A	#N/A	#N/A
YDR108W	8.97128	-1.03306	5.65896	-1.57385	0.540793	0.150109	#N/A	#N/A	#N/A
YFL048C	20.0511	0.596995	20.0327	0.00607511	0.59092	0.149779	#N/A	#N/A	#N/A
YKL072W	25.7116	1.42976	26.2084	0.684895	0.744861	0.149665	#N/A	#N/A	#N/A
YDL065C	13.1817	-0.413627	19.2661	-0.0781883	-0.335439	0.149438	#N/A	#N/A	#N/A
YPR021C	13.1611	-0.41666	16.9564	-0.332063	-0.0845972	0.147107	#N/A	#N/A	#N/A
YLR072W	10.4522	-0.815189	7.87014	-1.3308	0.515614	0.145638	#N/A	#N/A	#N/A
YBR166C	12.4037	-0.528088	9.98084	-1.0988	0.570712	0.145494	#N/A	#N/A	#N/A
YJL025W	15.8976	-0.0140702	22.8217	0.312639	-0.326709	0.145456	#N/A	#N/A	#N/A
YNL082W	6.64631	-1.37511	9.01756	-1.20468	-0.170425	0.145085	#N/A	#N/A	#N/A
YHR129C	7.44763	-1.25722	9.60808	-1.13977	-0.117444	0.14454	#N/A	#N/A	#N/A
YGR204W	18.2085	0.325908	23.8645	0.427257	-0.101348	0.143313	#N/A	#N/A	#N/A
YBR293W	8.04271	-1.16967	8.12664	-1.30261	0.132941	0.141376	#N/A	#N/A	#N/A
YLR190W	16.9899	0.146636	19.0051	-0.106872	0.253509	0.140435	#N/A	#N/A	#N/A
YOL090W	13.648	-0.345029	9.88272	-1.10959	0.764556	0.140159	#N/A	#N/A	#N/A
YNR008W	3.42261	-1.84937	5.15859	-1.62885	-0.220522	0.140022	#N/A	#N/A	#N/A
YGL186C	11.4514	-0.668182	13.5739	-0.703857	0.0356751	0.139682	#N/A	#N/A	#N/A
YDR294C	18.5387	0.374499	26.8498	0.755394	-0.380894	0.139662	#N/A	#N/A	#N/A
YBR008C	18.5083	0.370025	24.1207	0.455416	-0.0853916	0.139402	#N/A	#N/A	#N/A
YNL051W	6.94669	-1.33091	7.52108	-1.36917	0.0382568	0.139004	#N/A	#N/A	#N/A
YFR048W	21.8731	0.865054	25.6509	0.623619	0.241436	0.138815	#N/A	#N/A	#N/A
YBL036C	5.22465	-1.58426	5.01716	-1.6444	0.0601374	0.138286	#N/A	#N/A	#N/A
YJL091C	12.5427	-0.50763	14.256	-0.62889	0.12126	0.138127	#N/A	#N/A	#N/A
YDR449C	18.5748	0.379801	25.15	0.568563	-0.188762	0.137882	#N/A	#N/A	#N/A
YMR200W	17.2148	0.179723	20.0583	0.00888681	0.170836	0.137598	#N/A	#N/A	#N/A
YPL070W	11.571	-0.650591	13.5542	-0.706027	0.0554352	0.136963	#N/A	#N/A	#N/A
YPR103W	14.066	-0.28353	19.1491	-0.0910498	-0.19248	0.13681	#N/A	#N/A	#N/A
YOR018W	12.5798	-0.502181	14.4273	-0.610051	0.10787	0.135758	#N/A	#N/A	#N/A
YLR045C	28.1897	1.79434	39.6395	2.16121	-0.366876	0.135227	#N/A	#N/A	#N/A
YER032W	27.6436	1.714	35.9948	1.76059	-0.0465933	0.134802	#N/A	#N/A	#N/A
YER180C	11.016	-0.73224	13.5331	-0.708342	-0.0238989	0.134759	#N/A	#N/A	#N/A
YDL030W	5.93165	-1.48025	6.83658	-1.44441	-0.0358364	0.132989	#N/A	#N/A	#N/A
YKL155C	19.6422	0.536835	21.0581	0.118792	0.418043	0.132769	#N/A	#N/A	#N/A
YJL074C	5.6182	-1.52636	5.81635	-1.55655	0.0301923	0.1322	#N/A	#N/A	#N/A
YOL006C	19.9075	0.575872	24.9535	0.54696	0.0289121	0.131116	#N/A	#N/A	#N/A
YDR026C	16.5607	0.0834875	22.8575	0.316573	-0.233085	0.130858	#N/A	#N/A	#N/A
YBR217W	16.5419	0.0807319	21.5316	0.170832	-0.0901005	0.130624	#N/A	#N/A	#N/A
YML016C	23.2157	1.06257	30.0678	1.10911	-0.0465457	0.130231	#N/A	#N/A	#N/A
YNR011C	10.663	-0.784171	14.3149	-0.622411	-0.16176	0.129581	#N/A	#N/A	#N/A
YML041C	10.9116	-0.7476	18.6255	-0.148596	-0.599005	0.129057	#N/A	#N/A	#N/A
YMR176W	18.2302	0.329103	15.7653	-0.462986	0.792089	0.128777	#N/A	#N/A	#N/A
YKL047W	8.16397	-1.15183	8.62767	-1.24754	0.0957074	0.127685	#N/A	#N/A	#N/A
YML046W	16.621	0.0923676	16.3206	-0.401951	0.494318	0.127566	#N/A	#N/A	#N/A
YIL009W	8.64852	-1.08054	5.18195	-1.62628	0.545742	0.127461	#N/A	#N/A	#N/A
YPR049C	5.46447	-1.54898	8.2434	-1.28978	-0.259201	0.127304	#N/A	#N/A	#N/A
YLR095C	26.0731	1.48295	29.8851	1.08903	0.393923	0.126817	#N/A	#N/A	#N/A
YKL010C	20.3547	0.641666	20.8311	0.0938362	0.54783	0.126751	#N/A	#N/A	#N/A
YDR021W	7.78671	-1.20733	8.50243	-1.2613	0.0539733	0.126567	#N/A	#N/A	#N/A
YKL211C	14.0405	-0.287281	17.8436	-0.234545	-0.0527363	0.126242	#N/A	#N/A	#N/A
YDR228C	21.7016	0.839819	24.5205	0.499363	0.340456	0.12572	#N/A	#N/A	#N/A
YGR089W	32.6061	2.44408	39.9522	2.19559	0.24849	0.125679	#N/A	#N/A	#N/A
YLR023C	14.1607	-0.269598	18.1592	-0.19985	-0.0697488	0.125633	#N/A	#N/A	#N/A
YOR117W	22.6435	0.978388	27.7658	0.856085	0.122302	0.125556	#N/A	#N/A	#N/A
YGL223C	8.18295	-1.14904	8.87801	-1.22002	0.0709842	0.125181	#N/A	#N/A	#N/A
YPL221W	9.93124	-0.89183	12.6733	-0.802855	-0.0889753	0.124285	#N/A	#N/A	#N/A
YBL106C	9.79641	-0.911665	9.48659	-1.15313	0.241461	0.123166	#N/A	#N/A	#N/A
YML109W	16.4101	0.0613372	17.6102	-0.260197	0.321534	0.122809	#N/A	#N/A	#N/A
YBR109C	5.22958	-1.58353	7.77297	-1.34148	-0.242049	0.122739	#N/A	#N/A	#N/A
YFL025C	15.808	-0.0272476	23.5721	0.395123	-0.422371	0.122604	#N/A	#N/A	#N/A
YMR099C	6.64629	-1.37511	7.442	-1.37786	0.00275555	0.120658	#N/A	#N/A	#N/A
YOL019W	9.28139	-0.987435	14.7213	-0.577744	-0.40969	0.120392	#N/A	#N/A	#N/A
YLR114C	26.6632	1.56977	31.0924	1.22173	0.348038	0.120046	#N/A	#N/A	#N/A
YER013W	31.0894	2.22094	38.1376	1.99613	0.224811	0.120034	#N/A	#N/A	#N/A
YDL007W	22.8989	1.01596	23.3376	0.369349	0.646607	0.119862	#N/A	#N/A	#N/A
YJR137C	15.484	-0.0749084	22.8832	0.319397	-0.394305	0.11943	#N/A	#N/A	#N/A
YJL112W	23.546	1.11117	32.5141	1.37801	-0.266841	0.119404	#N/A	#N/A	#N/A
YKL215C	12.0981	-0.573043	13.9066	-0.667293	0.09425	0.119383	#N/A	#N/A	#N/A
YDR239C	19.4916	0.514686	16.9054	-0.337667	0.852352	0.118427	#N/A	#N/A	#N/A
YDR325W	21.7257	0.843355	23.6937	0.40849	0.434865	0.118182	#N/A	#N/A	#N/A
YPR111W	18.8401	0.418829	27.3717	0.812767	-0.393938	0.117994	#N/A	#N/A	#N/A
YDL044C	12.9551	-0.446957	8.90477	-1.21708	0.770122	0.117909	#N/A	#N/A	#N/A
YDR507C	16.456	0.0680914	17.8018	-0.23914	0.307232	0.116687	#N/A	#N/A	#N/A
YMR001C	21.4431	0.801792	22.9104	0.322392	0.4794	0.116578	#N/A	#N/A	#N/A
YPR025C	9.14335	-1.00774	13.8712	-0.671185	-0.336559	0.116484	#N/A	#N/A	#N/A
YJL069C	21.5383	0.815794	23.6428	0.402887	0.412907	0.114735	#N/A	#N/A	#N/A
YPL083C	5.55823	-1.53518	4.8705	-1.66052	0.125335	0.114106	#N/A	#N/A	#N/A
YHL008C	17.9341	0.285546	13.4489	-0.717596	1.00314	0.113491	#N/A	#N/A	#N/A
YML092C	10.0954	-0.867683	13.344	-0.729131	-0.138552	0.113068	#N/A	#N/A	#N/A
YIL076W	8.35984	-1.12301	11.9219	-0.88544	-0.237571	0.112798	#N/A	#N/A	#N/A
YJR126C	18.8664	0.422706	27.2309	0.797291	-0.374585	0.112524	#N/A	#N/A	#N/A
YLR336C	13.0536	-0.432473	17.2687	-0.297734	-0.134739	0.112416	#N/A	#N/A	#N/A
YIL027C	6.30506	-1.42531	9.42088	-1.16035	-0.26496	0.112352	#N/A	#N/A	#N/A
YBR127C	20.5008	0.663158	24.4042	0.486583	0.176575	0.111978	#N/A	#N/A	#N/A
YGR250C	14.6985	-0.190481	9.40286	-1.16233	0.971849	0.111968	#N/A	#N/A	#N/A
YLR226W	16.7627	0.113214	17.6121	-0.259991	0.373204	0.111828	#N/A	#N/A	#N/A
YDR515W	17.4334	0.211876	18.8848	-0.120098	0.331974	0.111798	#N/A	#N/A	#N/A
YML070W	9.97003	-0.886122	10.4271	-1.04975	0.163626	0.111726	#N/A	#N/A	#N/A
YLR419W	23.3296	1.07933	27.8095	0.860887	0.218441	0.111234	#N/A	#N/A	#N/A
YOL066C	17.3137	0.194271	21.5876	0.176991	0.0172806	0.110645	#N/A	#N/A	#N/A
YLR409C	24.1419	1.19883	31.7126	1.28991	-0.0910758	0.110461	#N/A	#N/A	#N/A
YLR144C	11.4461	-0.668971	17.3498	-0.288816	-0.380155	0.110425	#N/A	#N/A	#N/A
YML023C	11.1499	-0.712544	15.1774	-0.527608	-0.184936	0.110407	#N/A	#N/A	#N/A
YBL075C	11.4312	-0.671151	18.0173	-0.215453	-0.455698	0.110387	#N/A	#N/A	#N/A
YBL008W	6.59755	-1.38228	7.37918	-1.38477	0.00248889	0.110215	#N/A	#N/A	#N/A
YGR278W	11.9951	-0.588191	10.6088	-1.02978	0.441591	0.109653	#N/A	#N/A	#N/A
YLR143W	8.97926	-1.03188	11.5048	-0.931293	-0.100592	0.109569	#N/A	#N/A	#N/A
YJR107W	8.03197	-1.17125	7.36968	-1.38581	0.214564	0.109307	#N/A	#N/A	#N/A
YDL036C	8.12508	-1.15755	10.9203	-0.995532	-0.162018	0.109056	#N/A	#N/A	#N/A
YJR109C	10.626	-0.78961	11.1328	-0.972178	0.182568	0.108186	#N/A	#N/A	#N/A
YNL126W	16.1745	0.0266803	13.6162	-0.699207	0.725887	0.108183	#N/A	#N/A	#N/A
YER031C	8.05129	-1.16841	5.48664	-1.59279	0.424385	0.108075	#N/A	#N/A	#N/A
YGL180W	12.3939	-0.529526	12.3475	-0.838661	0.309135	0.107997	#N/A	#N/A	#N/A
YLR014C	7.33953	-1.27312	8.98883	-1.20784	-0.0652788	0.1077	#N/A	#N/A	#N/A
YMR145C	12.7777	-0.473059	5.45229	-1.59657	1.12351	0.107659	#N/A	#N/A	#N/A
YER130C	9.08817	-1.01586	11.4102	-0.941688	-0.0741724	0.10754	#N/A	#N/A	#N/A
YGL130W	11.8452	-0.610247	15.8909	-0.449178	-0.161069	0.107033	#N/A	#N/A	#N/A
YER176W	22.7641	0.996137	26.3517	0.700649	0.295487	0.106875	#N/A	#N/A	#N/A
YOR075W	9.29384	-0.985604	11.3038	-0.953388	-0.0322162	0.106569	#N/A	#N/A	#N/A
YMR185W	7.32157	-1.27576	7.56868	-1.36394	0.0881778	0.106507	#N/A	#N/A	#N/A
YPL190C	29.8278	2.03534	35.5724	1.71417	0.321171	0.106456	#N/A	#N/A	#N/A
YKR084C	14.6149	-0.202777	21.8969	0.210988	-0.413765	0.106303	#N/A	#N/A	#N/A
YPL174C	23.5927	1.11803	24.8615	0.53685	0.581184	0.10611	#N/A	#N/A	#N/A
YKR010C	28.2651	1.80543	31.0764	1.21997	0.585451	0.105941	#N/A	#N/A	#N/A
YCR094W	19.4175	0.503786	38.0626	1.98788	-1.48409	0.105533	#N/A	#N/A	#N/A
YER051W	11.5834	-0.648771	13.486	-0.713518	0.0647472	0.104165	#N/A	#N/A	#N/A
YGL085W	18.5154	0.371072	22.6766	0.29669	0.0743818	0.103313	#N/A	#N/A	#N/A
YML017W	27.7641	1.73173	32.5122	1.3778	0.353927	0.103008	#N/A	#N/A	#N/A
YAL010C	10.7046	-0.77806	14.6757	-0.582751	-0.195309	0.102348	#N/A	#N/A	#N/A
YLR440C	13.9692	-0.297764	20.4327	0.05004	-0.347804	0.102143	#N/A	#N/A	#N/A
YDL100C	11.9198	-0.599268	9.85717	-1.11239	0.513125	0.101599	#N/A	#N/A	#N/A
YDR372C	20.6227	0.681091	20.5912	0.0674685	0.613622	0.101538	#N/A	#N/A	#N/A
YLR135W	7.80678	-1.20438	6.76328	-1.45247	0.248088	0.101344	#N/A	#N/A	#N/A
YNL249C	12.3773	-0.531972	9.60756	-1.13983	0.607859	0.101207	#N/A	#N/A	#N/A
YOL095C	13.7251	-0.333676	13.8531	-0.673169	0.339493	0.101128	#N/A	#N/A	#N/A
YDL099W	12.6303	-0.494739	11.4963	-0.932223	0.437484	0.100882	#N/A	#N/A	#N/A
YDR198C	13.3193	-0.393387	13.3412	-0.72944	0.336053	0.100875	#N/A	#N/A	#N/A
YLR369W	10.7941	-0.76488	13.4329	-0.719356	-0.0455244	0.100413	#N/A	#N/A	#N/A
YPR173C	21.3881	0.793689	25.6992	0.62893	0.164759	0.100016	#N/A	#N/A	#N/A
YGR098C	22.0482	0.89081	29.3335	1.0284	-0.137587	0.0994003	#N/A	#N/A	#N/A
YLL019W-A	17.6448	0.24299	25.7979	0.639772	-0.396782	0.0992444	#N/A	#N/A	#N/A
YHR201C	11.6499	-0.638985	9.01743	-1.2047	0.565711	0.098902	#N/A	#N/A	#N/A
YPR108W	20.444	0.654796	23.3917	0.37529	0.279506	0.0975373	#N/A	#N/A	#N/A
YDR061W	22.4464	0.949387	10.2492	-1.06931	2.0187	0.0972138	#N/A	#N/A	#N/A
YJL127C	13.5188	-0.364029	22.1189	0.23539	-0.599419	0.0970039	#N/A	#N/A	#N/A
YHR204W	11.329	-0.686189	16.6753	-0.362958	-0.323232	0.0966197	#N/A	#N/A	#N/A
YDR349C	18.8602	0.421791	21.8417	0.204919	0.216872	0.0964999	#N/A	#N/A	#N/A
YFR044C	10.5357	-0.802905	13.0676	-0.759509	-0.0433966	0.0964333	#N/A	#N/A	#N/A
YBR239C	15.1871	-0.118591	21.191	0.133395	-0.251986	0.0962893	#N/A	#N/A	#N/A
YGR166W	16.7643	0.113437	10.5001	-1.04173	1.15516	0.0962359	#N/A	#N/A	#N/A
YGR134W	22.538	0.962872	23.642	0.402808	0.560064	0.0961736	#N/A	#N/A	#N/A
YDR332W	14.2898	-0.250605	17.5472	-0.267121	0.0165155	0.0959359	#N/A	#N/A	#N/A
YDR197W	10.7671	-0.768858	12.6603	-0.804284	0.0354254	0.0954146	#N/A	#N/A	#N/A
YCR092C	24.0316	1.1826	28.6617	0.954554	0.228049	0.0952101	#N/A	#N/A	#N/A
YBR237W	18.9769	0.438964	28.4037	0.926203	-0.487239	0.0946628	#N/A	#N/A	#N/A
YPL150W	20.4007	0.648433	23.5482	0.392492	0.255941	0.0944576	#N/A	#N/A	#N/A
YJL010C	20.8434	0.713559	28.0479	0.887085	-0.173526	0.0940017	#N/A	#N/A	#N/A
YCL054W	27.8959	1.75112	31.7241	1.29117	0.459949	0.0939778	#N/A	#N/A	#N/A
YDR227W	32.8359	2.47789	39.1152	2.10358	0.374302	0.0939068	#N/A	#N/A	#N/A
YBL037W	22.8997	1.01608	19.2283	-0.0823366	1.09842	0.0938569	#N/A	#N/A	#N/A
YGR026W	7.00747	-1.32197	5.89369	-1.54805	0.226078	0.0938331	#N/A	#N/A	#N/A
YHR001W	4.85754	-1.63827	5.26399	-1.61727	-0.0210033	0.0932909	#N/A	#N/A	#N/A
YDR180W	15.1739	-0.120535	9.43096	-1.15924	1.03871	0.0930856	#N/A	#N/A	#N/A
YGR196C	25.1975	1.35413	32.88	1.41822	-0.0640942	0.0923648	#N/A	#N/A	#N/A
YER183C	8.15552	-1.15307	6.97827	-1.42884	0.275764	0.0918053	#N/A	#N/A	#N/A
YLR033W	16.4019	0.060136	23.1767	0.351657	-0.291521	0.0917937	#N/A	#N/A	#N/A
YNR054C	8.01308	-1.17403	6.27097	-1.50658	0.332552	0.0915419	#N/A	#N/A	#N/A
YNL311C	17.0225	0.151428	20.2251	0.0272266	0.124201	0.0913314	#N/A	#N/A	#N/A
YIL144W	25.5241	1.40217	34.7519	1.62398	-0.221806	0.0911962	#N/A	#N/A	#N/A
YDL178W	6.10881	-1.45418	6.86674	-1.44109	-0.0130879	0.0909893	#N/A	#N/A	#N/A
YHR045W	17.2274	0.18157	21.9532	0.217169	-0.035599	0.0909724	#N/A	#N/A	#N/A
YNL022C	13.1032	-0.425166	17.1689	-0.3087	-0.116466	0.0909599	#N/A	#N/A	#N/A
YMR067C	5.97778	-1.47346	7.17706	-1.40699	-0.0664742	0.0909354	#N/A	#N/A	#N/A
YNL050C	11.4964	-0.661565	13.6255	-0.698193	0.0366277	0.0908011	#N/A	#N/A	#N/A
YGL048C	20.1045	0.604847	23.3448	0.370136	0.234711	0.0906288	#N/A	#N/A	#N/A
YMR198W	23.101	1.04569	31.0666	1.2189	-0.173209	0.0906173	#N/A	#N/A	#N/A
YMR061W	27.2801	1.66053	30.3028	1.13494	0.525588	0.0905232	#N/A	#N/A	#N/A
YOR233W	15.0311	-0.14155	27.1462	0.787972	-0.929522	0.0904018	#N/A	#N/A	#N/A
YOL049W	16.4524	0.0675611	19.7778	-0.0219402	0.0895012	0.0903219	#N/A	#N/A	#N/A
YDL190C	22.101	0.898577	29.5202	1.04892	-0.150341	0.0903063	#N/A	#N/A	#N/A
YDL020C	17.3734	0.20305	23.3949	0.375638	-0.172588	0.0900176	#N/A	#N/A	#N/A
YDR205W	14.7088	-0.188965	12.5468	-0.816752	0.627787	0.0898436	#N/A	#N/A	#N/A
YMR100W	24.5967	1.26575	28.5698	0.944453	0.321292	0.0892931	#N/A	#N/A	#N/A
YLL027W	9.03951	-1.02302	8.81465	-1.22698	0.203964	0.0891651	#N/A	#N/A	#N/A
YMR149W	12.2292	-0.55376	10.3812	-1.05479	0.501033	0.0889217	#N/A	#N/A	#N/A
YDL132W	27.9114	1.7534	33.7953	1.51883	0.23457	0.0888615	#N/A	#N/A	#N/A
YDL226C	20.8799	0.718921	20.9548	0.107437	0.611484	0.088736	#N/A	#N/A	#N/A
YGR179C	13.1526	-0.4179	17.3619	-0.287492	-0.130408	0.0885394	#N/A	#N/A	#N/A
YBL009W	25.0591	1.33376	30.6706	1.17537	0.158394	0.0880983	#N/A	#N/A	#N/A
YMR162C	23.5332	1.10929	24.7356	0.523015	0.586271	0.088037	#N/A	#N/A	#N/A
YCL061C	11.1789	-0.708271	15.2784	-0.516505	-0.191766	0.0876596	#N/A	#N/A	#N/A
YNL102W	12.8772	-0.458416	29.768	1.07616	-1.53458	0.0876055	#N/A	#N/A	#N/A
YML088W	15.7183	-0.0404354	13.0208	-0.764654	0.724219	0.0871697	#N/A	#N/A	#N/A
YHR166C	11.8016	-0.616663	11.1086	-0.97484	0.358177	0.0869958	#N/A	#N/A	#N/A
YJR042W	22.6429	0.978301	38.5894	2.04579	-1.06749	0.0864809	#N/A	#N/A	#N/A
YGL056C	15.3449	-0.0953793	19.067	-0.100074	0.00469424	0.0862773	#N/A	#N/A	#N/A
YOR195W	14.7033	-0.189767	19.2496	-0.0800031	-0.109764	0.0861632	#N/A	#N/A	#N/A
YBR260C	12.6211	-0.496107	21.0364	0.116405	-0.612512	0.0860337	#N/A	#N/A	#N/A
YPR074C	13.5033	-0.366317	13.3387	-0.729711	0.363394	0.0860206	#N/A	#N/A	#N/A
YNL166C	17.0674	0.158039	19.2919	-0.0753464	0.233386	0.0856874	#N/A	#N/A	#N/A
YPL026C	19.0822	0.454456	23.3472	0.370396	0.0840601	0.0853641	#N/A	#N/A	#N/A
YKL040C	15.482	-0.0752011	14.9984	-0.547286	0.472085	0.0851564	#N/A	#N/A	#N/A
YGR217W	18.8951	0.426925	24.1459	0.458191	-0.0312667	0.0841422	#N/A	#N/A	#N/A
YOR337W	10.7583	-0.770146	8.07334	-1.30847	0.538322	0.0838584	#N/A	#N/A	#N/A
YKL120W	9.73612	-0.920535	12.325	-0.841134	-0.0794009	0.0834239	#N/A	#N/A	#N/A
YJL014W	18.4081	0.355275	31.6761	1.2859	-0.930624	0.0827432	#N/A	#N/A	#N/A
YHR196W	13.2012	-0.410761	9.73719	-1.12558	0.714821	0.0826319	#N/A	#N/A	#N/A
YMR207C	8.82908	-1.05398	10.2457	-1.06969	0.0157112	0.0813821	#N/A	#N/A	#N/A
YDR484W	14.2557	-0.255621	14.9534	-0.552224	0.296603	0.0813319	#N/A	#N/A	#N/A
YPL151C	13.5661	-0.35707	21.4036	0.156765	-0.513836	0.0811719	#N/A	#N/A	#N/A
YLL035W	8.32253	-1.1285	9.08183	-1.19762	0.0691162	0.081023	#N/A	#N/A	#N/A
YER100W	11.7559	-0.623381	16.7034	-0.359875	-0.263506	0.0806328	#N/A	#N/A	#N/A
YML025C	16.2062	0.0313389	20.1488	0.0188382	0.0125007	0.0803604	#N/A	#N/A	#N/A
YGR282C	5.62845	-1.52485	8.75577	-1.23346	-0.291395	0.0803568	#N/A	#N/A	#N/A
YDR089W	17.4691	0.217128	21.9269	0.214282	0.00284653	0.080338	#N/A	#N/A	#N/A
YDR034C	27.3092	1.6648	36.8929	1.85931	-0.194506	0.0799552	#N/A	#N/A	#N/A
YJR053W	16.3693	0.055337	22.7058	0.299898	-0.244561	0.0799524	#N/A	#N/A	#N/A
YDR386W	6.31589	-1.42372	5.59601	-1.58077	0.157055	0.0795446	#N/A	#N/A	#N/A
YMR268C	12.4026	-0.528247	13.5719	-0.704081	0.175834	0.0794465	#N/A	#N/A	#N/A
YGL151W	25.4675	1.39385	29.2551	1.01978	0.374066	0.0790972	#N/A	#N/A	#N/A
YML062C	14.4931	-0.220685	15.4074	-0.50232	0.281635	0.0789685	#N/A	#N/A	#N/A
YPL262W	8.98069	-1.03167	4.99922	-1.64637	0.614695	0.0785757	#N/A	#N/A	#N/A
YGL244W	23.2989	1.0748	31.296	1.24412	-0.169315	0.0784868	#N/A	#N/A	#N/A
YDR166C	17.5119	0.223427	21.4271	0.159343	0.064084	0.0783279	#N/A	#N/A	#N/A
YJL201W	20.5455	0.669731	25.8626	0.646884	0.0228465	0.0781036	#N/A	#N/A	#N/A
YER052C	16.6175	0.0918431	9.93737	-1.10358	1.19542	0.0776485	#N/A	#N/A	#N/A
YNL021W	17.2174	0.180103	20.4026	0.0467386	0.133364	0.0769801	#N/A	#N/A	#N/A
YOR007C	8.64865	-1.08052	7.54836	-1.36617	0.285649	0.0769525	#N/A	#N/A	#N/A
YCR095C	10.6011	-0.793282	11.317	-0.95193	0.158649	0.0768867	#N/A	#N/A	#N/A
YCL030C	10.556	-0.799918	18.6033	-0.151043	-0.648875	0.0766708	#N/A	#N/A	#N/A
YPR125W	11.8101	-0.615412	17.3856	-0.284887	-0.330524	0.0765841	#N/A	#N/A	#N/A
YPL255W	15.3229	-0.0986159	24.1595	0.459681	-0.558297	0.0763216	#N/A	#N/A	#N/A
YPR048W	7.35182	-1.27131	17.9683	-0.220842	-1.05047	0.0762822	#N/A	#N/A	#N/A
YDR364C	19.3322	0.491236	15.2469	-0.519967	1.0112	0.0762155	#N/A	#N/A	#N/A
YGL113W	12.3361	-0.538023	11.5345	-0.92803	0.390007	0.0753905	#N/A	#N/A	#N/A
YMR102C	19.0635	0.451705	19.7549	-0.0244556	0.47616	0.0750642	#N/A	#N/A	#N/A
YDR438W	8.04229	-1.16973	7.65006	-1.35499	0.185265	0.0749728	#N/A	#N/A	#N/A
YHR149C	11.8244	-0.613307	9.44763	-1.15741	0.544102	0.0745781	#N/A	#N/A	#N/A
YBR023C	23.0661	1.04056	29.0265	0.99466	0.0458978	0.0745666	#N/A	#N/A	#N/A
YHR078W	8.68116	-1.07574	10.7853	-1.01038	-0.0653619	0.0741275	#N/A	#N/A	#N/A
YJL208C	9.19384	-1.00032	9.8406	-1.11421	0.1139	0.0739588	#N/A	#N/A	#N/A
YHR172W	18.2759	0.335834	26.2829	0.693083	-0.357249	0.0735411	#N/A	#N/A	#N/A
YNL062C	14.6584	-0.196374	17.5947	-0.261897	0.0655227	0.07348	#N/A	#N/A	#N/A
YLR113W	7.34467	-1.27236	10.2727	-1.06672	-0.20564	0.0728389	#N/A	#N/A	#N/A
YMR314W	9.57445	-0.94432	14.0632	-0.650078	-0.294242	0.0723118	#N/A	#N/A	#N/A
YDR037W	20.5434	0.669419	25.2298	0.577332	0.0920872	0.0720775	#N/A	#N/A	#N/A
YPL008W	20.6229	0.681113	26.8616	0.75669	-0.0755778	0.0714001	#N/A	#N/A	#N/A
YNL263C	18.1314	0.314574	20.4557	0.0525752	0.261999	0.0713716	#N/A	#N/A	#N/A
YOR356W	11.5676	-0.651089	7.89094	-1.32852	0.677428	0.0711791	#N/A	#N/A	#N/A
YKR064W	18.0996	0.309889	24.7721	0.527022	-0.217133	0.0709815	#N/A	#N/A	#N/A
YJL002C	15.7916	-0.0296553	21.7214	0.191696	-0.221351	0.070969	#N/A	#N/A	#N/A
YDR312W	10.0932	-0.868007	21.2672	0.14177	-1.00978	0.0709155	#N/A	#N/A	#N/A
YCR052W	11.3634	-0.681134	22.2408	0.248785	-0.929919	0.0708254	#N/A	#N/A	#N/A
YCR066W	6.51542	-1.39436	8.00052	-1.31647	-0.0778903	0.070761	#N/A	#N/A	#N/A
YEL053C	12.8645	-0.460291	15.1161	-0.53435	0.0740581	0.0706095	#N/A	#N/A	#N/A
YLR390W-A	14.2479	-0.256764	15.5348	-0.488322	0.231558	0.0698811	#N/A	#N/A	#N/A
YMR078C	8.09701	-1.16168	13.2519	-0.739254	-0.422425	0.0698311	#N/A	#N/A	#N/A
YHR039C	16.1325	0.0204933	17.0257	-0.32445	0.344943	0.0696423	#N/A	#N/A	#N/A
YPL125W	21.8874	0.867157	29.4304	1.03905	-0.171895	0.0694971	#N/A	#N/A	#N/A
YLR459W	12.5865	-0.501196	10.1607	-1.07904	0.577839	0.0692466	#N/A	#N/A	#N/A
YPL066W	8.04792	-1.1689	6.64017	-1.466	0.297098	0.0689746	#N/A	#N/A	#N/A
YPL253C	20.1896	0.617364	22.6164	0.290072	0.327293	0.0685705	#N/A	#N/A	#N/A
YIL151C	25.9076	1.45859	31.7227	1.29102	0.167576	0.0685155	#N/A	#N/A	#N/A
YPL227C	9.86537	-0.90152	15.8087	-0.458212	-0.443308	0.0680899	#N/A	#N/A	#N/A
YJR046W	14.4685	-0.224306	16.0784	-0.428574	0.204268	0.0680198	#N/A	#N/A	#N/A
YHR065C	22.9117	1.01785	29.5433	1.05146	-0.0336111	0.0679655	#N/A	#N/A	#N/A
YJR075W	11.2886	-0.692134	12.2343	-0.851106	0.158972	0.0677208	#N/A	#N/A	#N/A
YMR285C	12.8844	-0.457364	17.4224	-0.280843	-0.176521	0.0676345	#N/A	#N/A	#N/A
YBR164C	6.05344	-1.46233	11.4802	-0.933997	-0.528332	0.067516	#N/A	#N/A	#N/A
YNL049C	24.2219	1.2106	30.8397	1.19396	0.0166405	0.067505	#N/A	#N/A	#N/A
YFR010W	20.9298	0.726266	27.7844	0.858129	-0.131863	0.0669793	#N/A	#N/A	#N/A
YER151C	27.63	1.712	38.5401	2.04037	-0.32837	0.0665966	#N/A	#N/A	#N/A
YML080W	11.1014	-0.719677	11.8392	-0.894538	0.174861	0.0665459	#N/A	#N/A	#N/A
YBR094W	15.3925	-0.0883676	20.1846	0.0227738	-0.111141	0.0663237	#N/A	#N/A	#N/A
YGR171C	8.88255	-1.04611	18.9756	-0.110118	-0.935993	0.0657611	#N/A	#N/A	#N/A
YPL268W	19.1265	0.460969	26.9911	0.770932	-0.309964	0.0656978	#N/A	#N/A	#N/A
YKL077W	15.746	-0.0363712	20.4265	0.0493585	-0.0857297	0.0653588	#N/A	#N/A	#N/A
YDL141W	19.149	0.464286	23.2299	0.357512	0.106774	0.0652959	#N/A	#N/A	#N/A
YDL236W	5.46488	-1.54892	6.30393	-1.50296	-0.0459596	0.0652524	#N/A	#N/A	#N/A
YLL015W	5.33481	-1.56805	7.63289	-1.35688	-0.211171	0.0651496	#N/A	#N/A	#N/A
YBR295W	9.9826	-0.884273	10.7511	-1.01413	0.129857	0.0651139	#N/A	#N/A	#N/A
YLL006W	19.6619	0.539741	20.1216	0.0158539	0.523887	0.0650496	#N/A	#N/A	#N/A
YFR030W	15.5493	-0.0653015	17.2448	-0.300366	0.235065	0.0648613	#N/A	#N/A	#N/A
YNL239W	10.148	-0.859946	8.60597	-1.24992	0.389977	0.0647974	#N/A	#N/A	#N/A
YLR260W	10.8654	-0.754394	9.79495	-1.11923	0.364839	0.0647954	#N/A	#N/A	#N/A
YKL190W	8.35581	-1.1236	11.722	-0.90741	-0.216194	0.0644015	#N/A	#N/A	#N/A
YJR140C	19.4883	0.514203	26.8822	0.758956	-0.244753	0.0640016	#N/A	#N/A	#N/A
YHR133C	14.0978	-0.278855	9.85702	-1.11241	0.833555	0.0637033	#N/A	#N/A	#N/A
YDL102W	15.3111	-0.100352	17.9776	-0.219817	0.119465	0.0635712	#N/A	#N/A	#N/A
YIL088C	5.55713	-1.53535	7.02702	-1.42348	-0.111868	0.0634858	#N/A	#N/A	#N/A
YBR074W	21.7459	0.84633	17.4543	-0.277333	1.12366	0.0634547	#N/A	#N/A	#N/A
YDR131C	5.5891	-1.53064	5.73283	-1.56573	0.0350888	0.0634131	#N/A	#N/A	#N/A
YKR023W	10.784	-0.766371	16.8903	-0.339326	-0.427045	0.0630867	#N/A	#N/A	#N/A
YGR207C	11.203	-0.704725	10.234	-1.07098	0.366251	0.0625979	#N/A	#N/A	#N/A
YML059C	19.4693	0.511405	30.5915	1.16668	-0.655274	0.062472	#N/A	#N/A	#N/A
YKL210W	25.1761	1.35099	36.6704	1.83486	-0.483872	0.062084	#N/A	#N/A	#N/A
YML049C	25.5333	1.40353	32.6142	1.389	0.0145309	0.0620096	#N/A	#N/A	#N/A
YMR097C	13.118	-0.422994	11.572	-0.923909	0.500915	0.061849	#N/A	#N/A	#N/A
YOR093C	15.5792	-0.0609019	26.5266	0.719869	-0.78077	0.0617321	#N/A	#N/A	#N/A
YIL039W	6.47302	-1.4006	13.2619	-0.738156	-0.662444	0.0614119	#N/A	#N/A	#N/A
YLR259C	19.0534	0.450222	25.4695	0.603681	-0.153458	0.0612421	#N/A	#N/A	#N/A
YPL104W	9.07439	-1.01789	16.1112	-0.424963	-0.592925	0.060965	#N/A	#N/A	#N/A
YJL167W	9.72625	-0.921988	7.84061	-1.33405	0.412061	0.0609593	#N/A	#N/A	#N/A
YPR018W	14.996	-0.146703	15.7108	-0.468977	0.322274	0.0604601	#N/A	#N/A	#N/A
YLR057W	12.9074	-0.453976	26.0699	0.669672	-1.12365	0.0604421	#N/A	#N/A	#N/A
YBL068W	8.69134	-1.07424	8.80157	-1.22842	0.154179	0.0598245	#N/A	#N/A	#N/A
YDR164C	18.5039	0.36938	18.4458	-0.168347	0.537727	0.0595214	#N/A	#N/A	#N/A
YOR157C	13.3493	-0.388963	18.7667	-0.133082	-0.255881	0.0594422	#N/A	#N/A	#N/A
YBR179C	18.8143	0.415032	24.1463	0.45824	-0.0432082	0.0593066	#N/A	#N/A	#N/A
YHR118C	21.1371	0.756769	19.4333	-0.0598085	0.816578	0.0588987	#N/A	#N/A	#N/A
YMR258C	13.0476	-0.433358	17.0656	-0.320054	-0.113304	0.0586737	#N/A	#N/A	#N/A
YOR059C	19.8881	0.573012	29.6653	1.06487	-0.491862	0.0586491	#N/A	#N/A	#N/A
YNL199C	22.5721	0.967883	35.4355	1.69912	-0.731236	0.0585286	#N/A	#N/A	#N/A
YNL116W	19.9506	0.582216	27.372	0.812792	-0.230576	0.0585262	#N/A	#N/A	#N/A
YIR012W	15.5886	-0.0595278	14.9292	-0.554886	0.495358	0.0584131	#N/A	#N/A	#N/A
YCR045W-A	9.20823	-0.998198	9.47987	-1.15387	0.155667	0.058156	#N/A	#N/A	#N/A
YMR240C	11.1379	-0.714311	12.4098	-0.831815	0.117504	0.0578866	#N/A	#N/A	#N/A
YMR276W	13.6003	-0.352046	12.305	-0.843338	0.491291	0.0575494	#N/A	#N/A	#N/A
YHR208W	12.5657	-0.504247	12.5576	-0.815571	0.311324	0.057327	#N/A	#N/A	#N/A
YPL173W	10.4631	-0.81358	15.8845	-0.449882	-0.363699	0.0571184	#N/A	#N/A	#N/A
YGR184C	26.8358	1.59515	34.3371	1.57839	0.0167687	0.0570513	#N/A	#N/A	#N/A
YMR004W	11.7456	-0.624902	13.0243	-0.764274	0.139371	0.0569997	#N/A	#N/A	#N/A
YBR055C	13.1051	-0.4249	10.3214	-1.06136	0.636463	0.0568437	#N/A	#N/A	#N/A
YGL133W	15.9171	-0.0111925	22.0999	0.233301	-0.244493	0.0567047	#N/A	#N/A	#N/A
YEL025C	18.7107	0.399801	23.3862	0.374682	0.0251185	0.0564423	#N/A	#N/A	#N/A
YER049W	17.5081	0.222866	17.7658	-0.2431	0.465966	0.0559518	#N/A	#N/A	#N/A
YMR088C	8.99366	-1.02977	11.4165	-0.940996	-0.08877	0.0549573	#N/A	#N/A	#N/A
YDR081C	23.9449	1.16985	28.4822	0.934829	0.235021	0.0547976	#N/A	#N/A	#N/A
YBR272C	11.2576	-0.696691	10.9015	-0.997608	0.300917	0.0545071	#N/A	#N/A	#N/A
YBR137W	4.59712	-1.67658	7.84588	-1.33347	-0.343111	0.0541747	#N/A	#N/A	#N/A
YGL211W	12.9115	-0.453372	13.5244	-0.7093	0.255928	0.0541574	#N/A	#N/A	#N/A
YLR148W	12.4696	-0.518382	16.144	-0.421355	-0.0970269	0.0540603	#N/A	#N/A	#N/A
YBR110W	18.1646	0.319457	13.7408	-0.685513	1.00497	0.0538806	#N/A	#N/A	#N/A
YER123W	22.9079	1.01729	32.7948	1.40886	-0.391572	0.0532304	#N/A	#N/A	#N/A
YDR011W	20.1121	0.605975	29.3611	1.03143	-0.425458	0.0530473	#N/A	#N/A	#N/A
YHL011C	14.119	-0.275736	12.9144	-0.776351	0.500615	0.0530392	#N/A	#N/A	#N/A
YOR180C	6.95853	-1.32917	4.29955	-1.72327	0.394102	0.0530052	#N/A	#N/A	#N/A
YDL168W	4.59065	-1.67753	11.2194	-0.962659	-0.714875	0.0523834	#N/A	#N/A	#N/A
YLR107W	9.68262	-0.928406	9.34308	-1.1689	0.240496	0.0523595	#N/A	#N/A	#N/A
YJL204C	18.0091	0.296572	25.7073	0.629811	-0.333239	0.0522349	#N/A	#N/A	#N/A
YMR098C	9.37216	-0.97408	8.76378	-1.23258	0.258496	0.0521513	#N/A	#N/A	#N/A
YLR263W	14.3628	-0.239861	21.2331	0.138025	-0.377887	0.0518443	#N/A	#N/A	#N/A
YER126C	8.86976	-1.04799	7.47812	-1.37389	0.325899	0.05154	#N/A	#N/A	#N/A
YIL047C	15.1688	-0.121288	24.5028	0.497423	-0.618711	0.0514099	#N/A	#N/A	#N/A
YGR271W	19.2514	0.479352	27.4797	0.82463	-0.345278	0.0510456	#N/A	#N/A	#N/A
YKL028W	20.9579	0.730401	28.852	0.975472	-0.245071	0.0510031	#N/A	#N/A	#N/A
YDR464W	24.3006	1.22218	36.4622	1.81197	-0.589795	0.0509998	#N/A	#N/A	#N/A
YIL104C	17.8007	0.265918	20.0334	0.00614931	0.259769	0.0509415	#N/A	#N/A	#N/A
YJL087C	16.5967	0.0887823	19.4993	-0.0525506	0.141333	0.0500473	#N/A	#N/A	#N/A
YJR035W	10.2972	-0.837984	13.5516	-0.706314	-0.13167	0.0498429	#N/A	#N/A	#N/A
YBR125C	11.7024	-0.63126	11.118	-0.973803	0.342543	0.0497268	#N/A	#N/A	#N/A
YAL024C	30.901	2.19323	36.6073	1.82792	0.36531	0.0497225	#N/A	#N/A	#N/A
YDR194C	25.4776	1.39534	32.5664	1.38376	0.011583	0.0495817	#N/A	#N/A	#N/A
YER129W	27.7475	1.72928	34.711	1.61948	0.109799	0.0495112	#N/A	#N/A	#N/A
YNL250W	9.54925	-0.948027	15.4172	-0.501248	-0.446779	0.049404	#N/A	#N/A	#N/A
YDR427W	15.47	-0.0769747	21.9229	0.213843	-0.290817	0.0493869	#N/A	#N/A	#N/A
YDR394W	22.728	0.990826	27.2618	0.800684	0.190141	0.0491705	#N/A	#N/A	#N/A
YHR200W	15.2603	-0.107817	12.4166	-0.831065	0.723247	0.0491338	#N/A	#N/A	#N/A
YPL214C	7.81419	-1.20329	8.03275	-1.31293	0.109641	0.0487356	#N/A	#N/A	#N/A
YPR144C	17.7196	0.253992	23.2267	0.357154	-0.103162	0.0483574	#N/A	#N/A	#N/A
YAR007C	5.24385	-1.58143	13.686	-0.691541	-0.889894	0.0481553	#N/A	#N/A	#N/A
YGR048W	12.2913	-0.544625	10.1977	-1.07497	0.530343	0.0481417	#N/A	#N/A	#N/A
YHR120W	12.6083	-0.497983	32.6064	1.38815	-1.88614	0.0479414	#N/A	#N/A	#N/A
YDR262W	10.0191	-0.878907	12.5583	-0.81549	-0.0634173	0.0478453	#N/A	#N/A	#N/A
YDR110W	11.6293	-0.642008	14.2081	-0.634144	-0.00786346	0.0477603	#N/A	#N/A	#N/A
YDR440W	12.2314	-0.553431	13.1099	-0.754866	0.201435	0.0474993	#N/A	#N/A	#N/A
YJL183W	17.6079	0.237559	20.7843	0.0886926	0.148866	0.047083	#N/A	#N/A	#N/A
YKR054C	29.6953	2.01584	29.6146	1.0593	0.956537	0.0469564	#N/A	#N/A	#N/A
YPL049C	13.268	-0.400927	12.9583	-0.771521	0.370594	0.0467371	#N/A	#N/A	#N/A
YHR007C	10.4312	-0.818282	10.002	-1.09647	0.278191	0.0465835	#N/A	#N/A	#N/A
YPL086C	20.9569	0.730254	27.0364	0.77591	-0.0456554	0.0464642	#N/A	#N/A	#N/A
YIL085C	22.3679	0.937837	27.0821	0.780936	0.156902	0.0464438	#N/A	#N/A	#N/A
YML075C	17.8837	0.278132	21.2716	0.142251	0.135881	0.0460425	#N/A	#N/A	#N/A
YBR030W	18.3139	0.341424	18.9005	-0.118367	0.459791	0.0459666	#N/A	#N/A	#N/A
YFL056C	9.89998	-0.896428	12.3764	-0.835484	-0.0609439	0.0455137	#N/A	#N/A	#N/A
YHL029C	25.3956	1.38328	33.2823	1.46245	-0.0791687	0.0454257	#N/A	#N/A	#N/A
YOR296W	6.55408	-1.38867	8.59299	-1.25135	-0.137325	0.0453832	#N/A	#N/A	#N/A
YMR026C	9.03585	-1.02356	8.04242	-1.31187	0.288308	0.0453461	#N/A	#N/A	#N/A
YNL131W	16.2121	0.032212	17.0034	-0.326899	0.359111	0.0452955	#N/A	#N/A	#N/A
YFL037W	20.0148	0.591661	22.9907	0.331214	0.260447	0.0450798	#N/A	#N/A	#N/A
YEL031W	9.76069	-0.916921	13.0831	-0.757805	-0.159116	0.0449384	#N/A	#N/A	#N/A
YLL048C	24.7697	1.29119	34.6477	1.61252	-0.321333	0.0448815	#N/A	#N/A	#N/A
YOL022C	5.7796	-1.50262	5.8259	-1.5555	0.0528856	0.0445822	#N/A	#N/A	#N/A
YHR169W	9.84244	-0.904894	10.9414	-0.993216	0.0883222	0.0443021	#N/A	#N/A	#N/A
YGL120C	22.3098	0.929289	32.3805	1.36332	-0.434026	0.0438939	#N/A	#N/A	#N/A
YOR196C	12.3468	-0.536448	19.6491	-0.0360844	-0.500363	0.0438013	#N/A	#N/A	#N/A
YFR050C	18.778	0.409696	18.7733	-0.132353	0.542049	0.0434165	#N/A	#N/A	#N/A
YIL112W	27.1788	1.64562	32.1989	1.34336	0.302257	0.0432897	#N/A	#N/A	#N/A
YBR247C	16.4065	0.0608046	23.073	0.340264	-0.27946	0.0432756	#N/A	#N/A	#N/A
YDL152W	21.5138	0.812188	21.4832	0.165515	0.646673	0.0432328	#N/A	#N/A	#N/A
YGL144C	4.47517	-1.69452	7.97666	-1.31909	-0.375427	0.0430549	#N/A	#N/A	#N/A
YOL105C	12.6429	-0.492886	18.53	-0.159099	-0.333787	0.0429165	#N/A	#N/A	#N/A
YBR041W	13.8666	-0.312866	11.9951	-0.877397	0.564531	0.0427452	#N/A	#N/A	#N/A
YGL094C	26.6763	1.57168	31.478	1.26412	0.307562	0.0426089	#N/A	#N/A	#N/A
YJL162C	12.7614	-0.475452	13.2206	-0.742692	0.26724	0.0426045	#N/A	#N/A	#N/A
YHR063C	8.75668	-1.06463	7.80647	-1.3378	0.273172	0.0420823	#N/A	#N/A	#N/A
YGL215W	21.5893	0.823297	28.9778	0.989304	-0.166006	0.0420473	#N/A	#N/A	#N/A
YKL134C	19.6472	0.53757	18.9103	-0.117293	0.654863	0.0415011	#N/A	#N/A	#N/A
YOR078W	8.24527	-1.13987	10.5923	-1.03158	-0.108283	0.0414039	#N/A	#N/A	#N/A
YMR235C	18.5604	0.377684	25.394	0.595378	-0.217694	0.041354	#N/A	#N/A	#N/A
YFL018C	19.9814	0.586739	24.1739	0.461274	0.125465	0.0411368	#N/A	#N/A	#N/A
YPL188W	8.17071	-1.15084	14.2684	-0.627517	-0.52332	0.0409665	#N/A	#N/A	#N/A
YGL065C	14.8498	-0.168219	21.0464	0.117497	-0.285716	0.0409457	#N/A	#N/A	#N/A
YBR248C	16.2816	0.0424353	18.4837	-0.164187	0.206623	0.0408524	#N/A	#N/A	#N/A
YDR082W	16.9803	0.145221	19.897	-0.00883687	0.154058	0.0408321	#N/A	#N/A	#N/A
YJR041C	22.4265	0.946458	28.8816	0.978725	-0.0322672	0.0405377	#N/A	#N/A	#N/A
YCR042C	20.7094	0.693838	28.5481	0.942072	-0.248233	0.0405088	#N/A	#N/A	#N/A
YML007W	21.3539	0.788658	26.5634	0.723917	0.0647414	0.0404547	#N/A	#N/A	#N/A
YNL163C	19.2503	0.479189	29.7976	1.07941	-0.600222	0.0401527	#N/A	#N/A	#N/A
YMR211W	12.493	-0.514945	12.927	-0.774962	0.260017	0.0400907	#N/A	#N/A	#N/A
YNL201C	22.9821	1.0282	28.1923	0.902958	0.125244	0.0400417	#N/A	#N/A	#N/A
YHR150W	6.40287	-1.41092	11.7414	-0.905282	-0.505638	0.0398261	#N/A	#N/A	#N/A
YIL150C	13.8617	-0.313578	18.4786	-0.164743	-0.148835	0.0397809	#N/A	#N/A	#N/A
YOR188W	27.336	1.66874	35.1496	1.66769	0.00105767	0.0397452	#N/A	#N/A	#N/A
YOL103W	10.4612	-0.813856	18.1859	-0.196919	-0.616938	0.0389605	#N/A	#N/A	#N/A
YKR063C	9.97828	-0.884908	22.8049	0.310791	-1.1957	0.0388986	#N/A	#N/A	#N/A
YEL002C	7.82429	-1.2018	12.7262	-0.797035	-0.404766	0.0387777	#N/A	#N/A	#N/A
YLR418C	14.907	-0.159799	22.5922	0.287408	-0.447207	0.0379633	#N/A	#N/A	#N/A
YHR113W	6.66365	-1.37256	8.74188	-1.23498	-0.137571	0.0378826	#N/A	#N/A	#N/A
YKL048C	21.5582	0.818719	27.4181	0.817863	0.00085563	0.0378499	#N/A	#N/A	#N/A
YKL075C	15.8681	-0.0184014	20.957	0.10768	-0.126081	0.0378393	#N/A	#N/A	#N/A
YBR111W-A	30.1337	2.08034	35.9848	1.75949	0.320845	0.0376422	#N/A	#N/A	#N/A
YML015C	12.5934	-0.500172	12.9575	-0.77161	0.271438	0.0373641	#N/A	#N/A	#N/A
YIL128W	24.9358	1.31563	33.7778	1.51691	-0.201281	0.0369741	#N/A	#N/A	#N/A
YFL049W	18.1788	0.321546	31.1321	1.2261	-0.904555	0.0369577	#N/A	#N/A	#N/A
YDR057W	10.4861	-0.810201	14.5745	-0.593872	-0.216329	0.0368649	#N/A	#N/A	#N/A
YGL163C	17.2476	0.184542	24.0187	0.444209	-0.259667	0.0367731	#N/A	#N/A	#N/A
YNL048W	10.2448	-0.845704	16.8113	-0.348006	-0.497698	0.0364883	#N/A	#N/A	#N/A
YPL195W	20.2979	0.63331	32.863	1.41636	-0.783049	0.0364669	#N/A	#N/A	#N/A
YNL251C	8.42155	-1.11393	14.5349	-0.598227	-0.515707	0.0357171	#N/A	#N/A	#N/A
YOR165W	23.0501	1.0382	31.1464	1.22767	-0.189468	0.0354782	#N/A	#N/A	#N/A
YDR347W	8.81449	-1.05612	10.7455	-1.01475	-0.0413738	0.0348246	#N/A	#N/A	#N/A
YJR138W	19.373	0.497233	34.6377	1.61142	-1.11419	0.0345336	#N/A	#N/A	#N/A
YEL022W	26.2551	1.50973	32.7561	1.40461	0.105118	0.0344652	#N/A	#N/A	#N/A
YMR270C	26.6802	1.57226	23.3102	0.366336	1.20592	0.0339926	#N/A	#N/A	#N/A
YJL200C	11.5855	-0.648455	14.4911	-0.603038	-0.0454171	0.0339739	#N/A	#N/A	#N/A
YKR021W	15.5425	-0.0663019	25.9066	0.651726	-0.718028	0.0338545	#N/A	#N/A	#N/A
YPR141C	22.0864	0.896422	27.5229	0.829382	0.0670393	0.0334463	#N/A	#N/A	#N/A
YBL058W	22.5782	0.968773	28.3255	0.917607	0.0511661	0.0330531	#N/A	#N/A	#N/A
YPR106W	8.90851	-1.04229	5.04954	-1.64084	0.598545	0.0327487	#N/A	#N/A	#N/A
YBR103W	16.1636	0.0250768	16.7462	-0.355168	0.380245	0.0325434	#N/A	#N/A	#N/A
YAR003W	5.20746	-1.58679	10.2115	-1.07345	-0.51334	0.0325432	#N/A	#N/A	#N/A
YML085C	24.8412	1.30172	32.5563	1.38265	-0.0809282	0.0322319	#N/A	#N/A	#N/A
YOR127W	20.1899	0.61742	30.3802	1.14345	-0.526033	0.0320406	#N/A	#N/A	#N/A
YNR001C	10.791	-0.765342	11.0089	-0.985795	0.220452	0.0317757	#N/A	#N/A	#N/A
YJL124C	10.2683	-0.842242	19.2886	-0.0757102	-0.766532	0.0317644	#N/A	#N/A	#N/A
YML104C	19.7399	0.551207	29.8288	1.08285	-0.531638	0.0316762	#N/A	#N/A	#N/A
YOL099C	20.8014	0.707379	34.7514	1.62393	-0.916547	0.0316663	#N/A	#N/A	#N/A
YJL095W	14.9977	-0.146458	21.1975	0.134115	-0.280573	0.0315867	#N/A	#N/A	#N/A
YDR323C	10.1333	-0.862107	12.4663	-0.825607	-0.0364997	0.0315216	#N/A	#N/A	#N/A
YCR069W	7.33377	-1.27397	8.4765	-1.26415	-0.00981265	0.0314933	#N/A	#N/A	#N/A
YHR186C	18.2578	0.333169	29.9217	1.09305	-0.759884	0.0314457	#N/A	#N/A	#N/A
YDR393W	8.76326	-1.06366	11.5143	-0.930241	-0.133421	0.0312307	#N/A	#N/A	#N/A
YLL041C	8.17276	-1.15054	9.20137	-1.18448	0.0339421	0.0311999	#N/A	#N/A	#N/A
YOR261C	22.5074	0.95837	27.6503	0.843381	0.114989	0.0311203	#N/A	#N/A	#N/A
YGL095C	17.5935	0.23543	16.7982	-0.349451	0.584881	0.0310755	#N/A	#N/A	#N/A
YDL112W	26.4881	1.544	31.7804	1.29735	0.246648	0.0309438	#N/A	#N/A	#N/A
YJL134W	10.7004	-0.778669	6.95	-1.43194	0.653274	0.030918	#N/A	#N/A	#N/A
YDR146C	24.7317	1.2856	26.9808	0.769794	0.51581	0.0309123	#N/A	#N/A	#N/A
YMR092C	20.6177	0.680356	26.9919	0.771012	-0.0906557	0.0304459	#N/A	#N/A	#N/A
YJL187C	13.2663	-0.401175	14.5734	-0.593992	0.192817	0.0303981	#N/A	#N/A	#N/A
YGL107C	19.7224	0.548635	26.0621	0.668811	-0.120176	0.0303758	#N/A	#N/A	#N/A
YPR083W	13.6965	-0.33789	11.0699	-0.979093	0.641203	0.0301644	#N/A	#N/A	#N/A
YDL147W	21.0385	0.742255	25.0985	0.562899	0.179356	0.0301429	#N/A	#N/A	#N/A
YLR024C	17.7789	0.262709	19.5994	-0.0415473	0.304256	0.0301289	#N/A	#N/A	#N/A
YDL028C	32.8239	2.47613	30.7581	1.18498	1.29114	0.0300374	#N/A	#N/A	#N/A
YLR289W	13.2671	-0.401066	11.2979	-0.954035	0.552969	0.0298894	#N/A	#N/A	#N/A
YBR195C	2.59469	-1.97118	6.92156	-1.43507	-0.536109	0.0297725	#N/A	#N/A	#N/A
YAL040C	12.7488	-0.477318	12.8937	-0.778629	0.301311	0.0295777	#N/A	#N/A	#N/A
YIL108W	9.87096	-0.900698	12.3158	-0.842144	-0.0585539	0.029262	#N/A	#N/A	#N/A
YML043C	24.9748	1.32137	29.714	1.07022	0.251145	0.0290465	#N/A	#N/A	#N/A
YDR017C	30.8947	2.1923	34.87	1.63696	0.555339	0.0290266	#N/A	#N/A	#N/A
YKL106W	4.26089	-1.72605	6.74436	-1.45455	-0.271501	0.028948	#N/A	#N/A	#N/A
YJL046W	15.2161	-0.114322	15.2471	-0.519943	0.405622	0.0285803	#N/A	#N/A	#N/A
YML002W	12.4946	-0.514705	13.6182	-0.698992	0.184288	0.0282411	#N/A	#N/A	#N/A
YLR335W	30.711	2.16527	35.809	1.74017	0.425098	0.0281034	#N/A	#N/A	#N/A
YKL145W	20.8679	0.717162	27.9284	0.873956	-0.156794	0.02804	#N/A	#N/A	#N/A
YML071C	18.7431	0.40456	20.7889	0.0892026	0.315358	0.0277453	#N/A	#N/A	#N/A
YPL155C	16.8109	0.120301	23.0758	0.340571	-0.22027	0.0274727	#N/A	#N/A	#N/A
YBR227C	8.94937	-1.03628	12.2752	-0.846604	-0.189678	0.0272185	#N/A	#N/A	#N/A
YNL323W	5.4018	-1.5582	7.42583	-1.37964	-0.178556	0.0270983	#N/A	#N/A	#N/A
YLR305C	29.565	1.99667	31.7649	1.29566	0.701011	0.0270052	#N/A	#N/A	#N/A
YGR150C	19.8422	0.566256	24.5344	0.500896	0.06536	0.0267696	#N/A	#N/A	#N/A
YDR181C	13.7294	-0.33305	12.8067	-0.788183	0.455133	0.0265191	#N/A	#N/A	#N/A
YPL176C	18.3078	0.340529	20.1133	0.0149328	0.325596	0.0264356	#N/A	#N/A	#N/A
YPL215W	9.00705	-1.0278	14.265	-0.6279	-0.399895	0.0264029	#N/A	#N/A	#N/A
YDL171C	25.6824	1.42547	24.8662	0.537361	0.888113	0.0258888	#N/A	#N/A	#N/A
YGL013C	20.7659	0.702162	26.9677	0.768354	-0.066192	0.0256433	#N/A	#N/A	#N/A
YDL097C	19.5785	0.527467	28.5729	0.944801	-0.417334	0.0253527	#N/A	#N/A	#N/A
YOR058C	19.2944	0.485669	28.2221	0.906232	-0.420564	0.0253182	#N/A	#N/A	#N/A
YCR067C	23.105	1.04628	27.7287	0.852001	0.194274	0.0252326	#N/A	#N/A	#N/A
YMR091C	17.5276	0.225739	20.52	0.0596452	0.166094	0.0250829	#N/A	#N/A	#N/A
YNL054W	24.432	1.2415	37.2938	1.90338	-0.661872	0.0250823	#N/A	#N/A	#N/A
YNR053C	17.425	0.210649	22.4828	0.27539	-0.0647408	0.0248695	#N/A	#N/A	#N/A
YDL209C	12.1285	-0.568575	18.7795	-0.131677	-0.436898	0.0247419	#N/A	#N/A	#N/A
YIL035C	20.5063	0.663958	27.7655	0.856049	-0.192092	0.024618	#N/A	#N/A	#N/A
YLR039C	19.2949	0.485744	28.0665	0.889139	-0.403395	0.0246061	#N/A	#N/A	#N/A
YJR065C	18.4122	0.355888	31.934	1.31424	-0.958355	0.0245617	#N/A	#N/A	#N/A
YOR353C	25.5883	1.41163	25.6692	0.625632	0.785996	0.0244725	#N/A	#N/A	#N/A
YFR004W	11.706	-0.630736	11.2783	-0.956191	0.325456	0.0243883	#N/A	#N/A	#N/A
YPR057W	11.4985	-0.661255	9.74414	-1.12482	0.463562	0.0243665	#N/A	#N/A	#N/A
YOR308C	12.9114	-0.453389	21.2809	0.143279	-0.596667	0.0241159	#N/A	#N/A	#N/A
YFR038W	16.2481	0.0375032	17.8873	-0.229739	0.267242	0.0240938	#N/A	#N/A	#N/A
YBR200W	11.5895	-0.647869	16.266	-0.407954	-0.239916	0.0236555	#N/A	#N/A	#N/A
YJL049W	12.0905	-0.574155	13.1675	-0.748535	0.17438	0.0236092	#N/A	#N/A	#N/A
YGL229C	8.68247	-1.07555	14.7361	-0.576111	-0.499437	0.0235652	#N/A	#N/A	#N/A
YJL092W	22.9569	1.02449	32.6177	1.38939	-0.364902	0.0230043	#N/A	#N/A	#N/A
YIR002C	18.6485	0.39064	19.7625	-0.0236257	0.414266	0.0229282	#N/A	#N/A	#N/A
YDR300C	15.2313	-0.112088	18.5258	-0.159554	0.0474668	0.0228987	#N/A	#N/A	#N/A
YNL118C	30.0966	2.07488	37.8634	1.96599	0.108895	0.0227757	#N/A	#N/A	#N/A
YOR323C	12.9718	-0.444498	20.5338	0.0611593	-0.505657	0.0227447	#N/A	#N/A	#N/A
YPR119W	13.9741	-0.297042	16.5989	-0.371356	0.0743143	0.0226085	#N/A	#N/A	#N/A
YBL023C	3.92178	-1.77594	9.40131	-1.1625	-0.613435	0.022372	#N/A	#N/A	#N/A
YAL026C	22.2393	0.91892	25.9453	0.655975	0.262945	0.0221493	#N/A	#N/A	#N/A
YOR249C	8.44373	-1.11067	8.03544	-1.31263	0.201963	0.0220989	#N/A	#N/A	#N/A
YPR045C	19.7277	0.549419	18.9009	-0.118324	0.667743	0.0218223	#N/A	#N/A	#N/A
YLR129W	17.1794	0.174516	31.1721	1.2305	-1.05598	0.0217529	#N/A	#N/A	#N/A
YAL022C	6.11984	-1.45256	4.92152	-1.65491	0.202349	0.0216643	#N/A	#N/A	#N/A
YNR043W	10.0787	-0.870134	10.8709	-1.00097	0.130835	0.0214091	#N/A	#N/A	#N/A
YNL112W	11.5204	-0.65804	5.56286	-1.58441	0.926374	0.0213374	#N/A	#N/A	#N/A
YCL050C	13.63	-0.347678	18.4552	-0.167319	-0.180359	0.0212507	#N/A	#N/A	#N/A
YKL197C	8.73766	-1.06743	13.911	-0.666807	-0.400621	0.021021	#N/A	#N/A	#N/A
YGL234W	9.75116	-0.918323	17.7311	-0.246904	-0.67142	0.0207016	#N/A	#N/A	#N/A
YPR179C	22.3736	0.938676	28.6144	0.949357	-0.0106811	0.0203289	#N/A	#N/A	#N/A
YER094C	7.63738	-1.2293	6.92361	-1.43484	0.205543	0.0201471	#N/A	#N/A	#N/A
YMR080C	23.7473	1.14077	32.9	1.42042	-0.279646	0.0200612	#N/A	#N/A	#N/A
YBL014C	30.5572	2.14264	36.1133	1.77362	0.369021	0.0199381	#N/A	#N/A	#N/A
YKR006C	12.1054	-0.571963	11.2947	-0.954379	0.382416	0.0195143	#N/A	#N/A	#N/A
YDL013W	20.5533	0.670874	26.9368	0.764956	-0.0940823	0.0188124	#N/A	#N/A	#N/A
YMR221C	9.3087	-0.983418	8.51573	-1.25984	0.276423	0.0187599	#N/A	#N/A	#N/A
YPL118W	10.9074	-0.748212	24.7315	0.522559	-1.27077	0.0187246	#N/A	#N/A	#N/A
YPR071W	19.5446	0.52248	25.8855	0.649401	-0.126921	0.0186938	#N/A	#N/A	#N/A
YPR104C	32.4412	2.41982	34.0213	1.54368	0.876141	0.0186478	#N/A	#N/A	#N/A
YOL113W	19.566	0.525628	21.3852	0.154738	0.370889	0.01854	#N/A	#N/A	#N/A
YGR255C	7.38137	-1.26696	12.423	-0.830364	-0.4366	0.0184357	#N/A	#N/A	#N/A
YJL107C	5.28864	-1.57484	10.3375	-1.05959	-0.515251	0.0184158	#N/A	#N/A	#N/A
YLR397C	13.0255	-0.436604	19.231	-0.0820415	-0.354562	0.0183482	#N/A	#N/A	#N/A
YJL041W	23.8758	1.15968	31.1095	1.22362	-0.0639319	0.0183208	#N/A	#N/A	#N/A
YLL011W	14.3451	-0.242465	13.5738	-0.703866	0.4614	0.0182955	#N/A	#N/A	#N/A
YAL011W	17.9549	0.288611	24.2963	0.474725	-0.186114	0.0182671	#N/A	#N/A	#N/A
YBR245C	17.6745	0.247345	30.8454	1.19459	-0.947241	0.0181935	#N/A	#N/A	#N/A
YMR212C	23.8949	1.16249	33.2248	1.45612	-0.293629	0.0180996	#N/A	#N/A	#N/A
YDL180W	14.0978	-0.278855	14.8729	-0.561081	0.282226	0.0178224	#N/A	#N/A	#N/A
YDL188C	6.58586	-1.384	12.9816	-0.768961	-0.615039	0.0177718	#N/A	#N/A	#N/A
YDR080W	9.94454	-0.889873	15.4644	-0.496059	-0.393814	0.0175775	#N/A	#N/A	#N/A
YOR354C	21.3336	0.785678	25.1311	0.566476	0.219202	0.0171963	#N/A	#N/A	#N/A
YBR170C	15.2434	-0.11031	13.3379	-0.729794	0.619484	0.0171517	#N/A	#N/A	#N/A
YDR206W	23.0532	1.03867	32.7878	1.40809	-0.369422	0.0169804	#N/A	#N/A	#N/A
YHL030W	20.0167	0.591941	26.5222	0.719384	-0.127444	0.0169514	#N/A	#N/A	#N/A
YJL117W	13.3452	-0.389576	12.9081	-0.777045	0.387469	0.0167978	#N/A	#N/A	#N/A
YLR233C	3.46039	-1.84382	9.11006	-1.19451	-0.649301	0.016546	#N/A	#N/A	#N/A
YDR283C	27.4466	1.68501	33.1917	1.45249	0.23252	0.0165393	#N/A	#N/A	#N/A
YPL207W	12.0285	-0.583276	32.0566	1.32772	-1.91099	0.0164063	#N/A	#N/A	#N/A
YGL202W	16.8271	0.12269	26.061	0.668692	-0.546002	0.0163862	#N/A	#N/A	#N/A
YJR006W	17.0903	0.1614	20.1172	0.0153676	0.146032	0.0160139	#N/A	#N/A	#N/A
YMR234W	7.20715	-1.2926	6.80166	-1.44825	0.155652	0.0159668	#N/A	#N/A	#N/A
YJL008C	22.8425	1.00766	33.1187	1.44446	-0.436802	0.0157726	#N/A	#N/A	#N/A
YFR019W	27.3932	1.67717	34.5772	1.60478	0.0723861	0.0154485	#N/A	#N/A	#N/A
YCR026C	20.7859	0.705103	25.3843	0.594317	0.110786	0.0152796	#N/A	#N/A	#N/A
YBL031W	8.63462	-1.08259	7.49795	-1.37171	0.289126	0.0150715	#N/A	#N/A	#N/A
YGR216C	9.40386	-0.969416	14.5273	-0.599064	-0.370353	0.015028	#N/A	#N/A	#N/A
YMR247C	19.2322	0.476521	24.7755	0.52739	-0.0508686	0.0143582	#N/A	#N/A	#N/A
YHR151C	12.7232	-0.481074	17.9903	-0.218413	-0.262661	0.0143132	#N/A	#N/A	#N/A
YEL016C	15.7648	-0.033598	18.5466	-0.157269	0.123671	0.0140351	#N/A	#N/A	#N/A
YDR495C	12.1342	-0.56773	16.8037	-0.348849	-0.218882	0.0139533	#N/A	#N/A	#N/A
YKR029C	24.8128	1.29754	30.2871	1.13321	0.164326	0.0139489	#N/A	#N/A	#N/A
YHR074W	16.6787	0.100847	24.4567	0.492355	-0.391508	0.0137655	#N/A	#N/A	#N/A
YLR020C	10.8045	-0.763355	12.8152	-0.787256	0.0239012	0.0137439	#N/A	#N/A	#N/A
YPL159C	9.68014	-0.928771	35.3247	1.68694	-2.61571	0.0136979	#N/A	#N/A	#N/A
YLR398C	25.6363	1.41868	33.7422	1.513	-0.0943186	0.0135661	#N/A	#N/A	#N/A
YKR079C	17.8324	0.270584	27.7508	0.854428	-0.583844	0.0132593	#N/A	#N/A	#N/A
YDL138W	8.91761	-1.04095	16.9337	-0.334556	-0.706398	0.0131929	#N/A	#N/A	#N/A
YDR316W	14.9785	-0.149284	13.4939	-0.71265	0.563366	0.0130823	#N/A	#N/A	#N/A
YGL083W	21.0466	0.743454	14.1666	-0.638708	1.38216	0.0130164	#N/A	#N/A	#N/A
YML105C	7.82956	-1.20103	9.63326	-1.13701	-0.0640223	0.0129968	#N/A	#N/A	#N/A
YOL060C	20.0766	0.600747	28.675	0.956018	-0.355272	0.0128279	#N/A	#N/A	#N/A
YGR266W	13.5027	-0.366396	18.3528	-0.17857	-0.187825	0.0125878	#N/A	#N/A	#N/A
YNL099C	10.1493	-0.859745	5.71483	-1.56771	0.707965	0.0125306	#N/A	#N/A	#N/A
YNR029C	10.5736	-0.79733	11.1051	-0.975228	0.177898	0.0124271	#N/A	#N/A	#N/A
YMR246W	12.6192	-0.496378	14.1934	-0.635767	0.139389	0.0119032	#N/A	#N/A	#N/A
YMR155W	7.72569	-1.21631	11.1145	-0.974191	-0.242117	0.0112507	#N/A	#N/A	#N/A
YOR046C	19.0284	0.446543	20.9877	0.111053	0.33549	0.0111279	#N/A	#N/A	#N/A
YGL112C	22.6102	0.973495	31.1538	1.22848	-0.25499	0.0110377	#N/A	#N/A	#N/A
YLR363C	9.14904	-1.00691	11.5883	-0.922114	-0.0847921	0.0110169	#N/A	#N/A	#N/A
YDR267C	11.0193	-0.731751	12.3356	-0.839972	0.108221	0.0107319	#N/A	#N/A	#N/A
YLR386W	13.6668	-0.342255	20.6737	0.0765351	-0.418791	0.0106976	#N/A	#N/A	#N/A
YLR268W	5.3327	-1.56836	7.36536	-1.38629	-0.182074	0.0104219	#N/A	#N/A	#N/A
YJL125C	15.2899	-0.103474	20.5474	0.062647	-0.166121	0.00997852	#N/A	#N/A	#N/A
YGL169W	17.0821	0.160199	19.8422	-0.0148626	0.175062	0.00987427	#N/A	#N/A	#N/A
YML061C	9.98025	-0.884619	17.3305	-0.290944	-0.593675	0.00976034	#N/A	#N/A	#N/A
YDR379W	18.2601	0.333503	30.3101	1.13575	-0.802247	0.00974211	#N/A	#N/A	#N/A
YMR239C	11.7647	-0.622097	16.4907	-0.38325	-0.238847	0.00941252	#N/A	#N/A	#N/A
YLR443W	8.27488	-1.13551	10.1208	-1.08342	-0.0520908	0.00916412	#N/A	#N/A	#N/A
YKL140W	16.8597	0.127486	18.2299	-0.19208	0.319566	0.00909205	#N/A	#N/A	#N/A
YDL031W	20.514	0.665092	28.0496	0.887278	-0.222186	0.00905903	#N/A	#N/A	#N/A
YCR002C	14.5586	-0.211056	19.6112	-0.0402557	-0.1708	0.00880561	#N/A	#N/A	#N/A
YMR119W	19.636	0.535925	24.9374	0.545192	-0.00926654	0.00858943	#N/A	#N/A	#N/A
YDL189W	19.8662	0.569796	20.1041	0.0139287	0.555867	0.00841123	#N/A	#N/A	#N/A
YKL014C	30.1422	2.08159	36.7297	1.84137	0.240216	0.00814292	#N/A	#N/A	#N/A
YHR190W	12.0696	-0.577239	17.7031	-0.24999	-0.32725	0.00806124	#N/A	#N/A	#N/A
YOL144W	12.7749	-0.473477	17.0037	-0.326864	-0.146613	0.00802973	#N/A	#N/A	#N/A
YBR288C	17.9152	0.282758	20.1891	0.023264	0.259494	0.00780439	#N/A	#N/A	#N/A
YMR273C	29.5411	1.99316	37.7965	1.95863	0.034524	0.00776325	#N/A	#N/A	#N/A
YER171W	10.6469	-0.786546	5.76547	-1.56214	0.775599	0.00772052	#N/A	#N/A	#N/A
YLR181C	7.70863	-1.21882	11.9682	-0.880354	-0.338464	0.00768229	#N/A	#N/A	#N/A
YER143W	11.601	-0.646171	12.2295	-0.851628	0.205457	0.00763495	#N/A	#N/A	#N/A
YPL226W	26.1649	1.49645	30.2556	1.12975	0.366701	0.00760657	#N/A	#N/A	#N/A
YGL176C	13.9233	-0.304517	20.6495	0.0738773	-0.378395	0.0074424	#N/A	#N/A	#N/A
YLR451W	18.6962	0.39766	22.4135	0.267765	0.129895	0.00737152	#N/A	#N/A	#N/A
YNL298W	20.3038	0.634165	31.7699	1.2962	-0.662036	0.00736625	#N/A	#N/A	#N/A
YLR166C	15.7438	-0.0366942	12.115	-0.864216	0.827522	0.00732085	#N/A	#N/A	#N/A
YJL012C	17.2883	0.190541	21.8827	0.20942	-0.0188792	0.00726535	#N/A	#N/A	#N/A
YBL038W	7.61903	-1.232	7.67013	-1.35279	0.120788	0.00724012	#N/A	#N/A	#N/A
YPL133C	16.3244	0.0487313	21.0377	0.116542	-0.0678111	0.00708243	#N/A	#N/A	#N/A
YLR272C	21.1911	0.764714	25.8209	0.642301	0.122413	0.00699872	#N/A	#N/A	#N/A
YCR081W	12.5264	-0.510036	7.87382	-1.3304	0.820363	0.0062789	#N/A	#N/A	#N/A
YBL022C	28.2083	1.79707	36.076	1.76952	0.0275526	0.00614295	#N/A	#N/A	#N/A
YGL110C	15.1147	-0.12924	23.1645	0.35032	-0.479561	0.00569815	#N/A	#N/A	#N/A
YOR144C	11.1964	-0.705695	11.0333	-0.983115	0.27742	0.00559481	#N/A	#N/A	#N/A
YBR259W	9.08302	-1.01662	6.60898	-1.46943	0.452809	0.00558439	#N/A	#N/A	#N/A
YGR090W	27.5099	1.69432	38.8227	2.07144	-0.377111	0.00532953	#N/A	#N/A	#N/A
YMR188C	8.4479	-1.11006	15.0861	-0.537643	-0.572414	0.00512055	#N/A	#N/A	#N/A
YDL148C	26.1233	1.49033	30.8113	1.19084	0.299496	0.00501946	#N/A	#N/A	#N/A
YLL007C	11.0499	-0.727246	11.603	-0.920495	0.19325	0.00494492	#N/A	#N/A	#N/A
YDL056W	29.9965	2.06016	31.4455	1.26055	0.799613	0.0048417	#N/A	#N/A	#N/A
YDL202W	7.25689	-1.28528	7.64285	-1.35579	0.070509	0.00474398	#N/A	#N/A	#N/A
YMR167W	14.6569	-0.196588	24.6305	0.511457	-0.708046	0.00468889	#N/A	#N/A	#N/A
YDL116W	21.5425	0.816415	36.4797	1.81389	-0.997477	0.0045483	#N/A	#N/A	#N/A
YOR241W	24.8619	1.30476	28.932	0.984266	0.320494	0.00437758	#N/A	#N/A	#N/A
YDL156W	8.05065	-1.1685	9.29857	-1.17379	0.00529409	0.00428107	#N/A	#N/A	#N/A
YDR083W	7.54291	-1.2432	8.62787	-1.24752	0.00431761	0.00410445	#N/A	#N/A	#N/A
YPL139C	8.3461	-1.12503	11.5973	-0.921124	-0.20391	0.00392986	#N/A	#N/A	#N/A
YPL053C	24.5309	1.25606	23.6632	0.405134	0.850924	0.00388305	#N/A	#N/A	#N/A
YKL027W	11.7385	-0.625941	9.9332	-1.10404	0.478096	0.00384071	#N/A	#N/A	#N/A
YKR002W	17.8474	0.272784	18.2788	-0.186707	0.459492	0.00367538	#N/A	#N/A	#N/A
YER021W	24.7642	1.29039	31.6132	1.27898	0.0114048	0.00352417	#N/A	#N/A	#N/A
YDR142C	8.11508	-1.15902	16.5517	-0.376549	-0.782473	0.00351168	#N/A	#N/A	#N/A
YLR401C	15.0642	-0.136667	24.1123	0.454499	-0.591166	0.00346099	#N/A	#N/A	#N/A
YIL161W	6.90715	-1.33673	9.2604	-1.17799	-0.158742	0.00328704	#N/A	#N/A	#N/A
YPR056W	22.4101	0.944054	4.81062	-1.6671	2.61115	0.00313453	#N/A	#N/A	#N/A
YJL053W	18.5399	0.374663	15.7196	-0.468011	0.842675	0.00298515	#N/A	#N/A	#N/A
YPL145C	27.3278	1.66753	27.9545	0.876826	0.790706	0.00297283	#N/A	#N/A	#N/A
YLR319C	22.4537	0.950469	30.3843	1.1439	-0.193435	0.00267969	#N/A	#N/A	#N/A
YBR251W	14.7103	-0.188739	17.3222	-0.291853	0.103114	0.00267913	#N/A	#N/A	#N/A
YPR032W	17.3542	0.200235	21.1891	0.133189	0.0670465	0.00267617	#N/A	#N/A	#N/A
YOR305W	9.24695	-0.992501	14.8715	-0.561226	-0.431275	0.0025924	#N/A	#N/A	#N/A
YDR257C	19.1701	0.46739	23.5386	0.391434	0.0759566	0.00250107	#N/A	#N/A	#N/A
YER157W	26.9972	1.6189	29.1765	1.01115	0.607752	0.00247657	#N/A	#N/A	#N/A
YNL008C	5.32747	-1.56913	11.5231	-0.929281	-0.63985	0.00243979	#N/A	#N/A	#N/A
YKL036C	12.5377	-0.508366	14.1335	-0.642345	0.13398	0.00243786	#N/A	#N/A	#N/A
YIL147C	21.417	0.79795	30.2353	1.12752	-0.329571	0.00193041	#N/A	#N/A	#N/A
YNL206C	8.93393	-1.03855	14.5857	-0.592644	-0.44591	0.00183165	#N/A	#N/A	#N/A
YDR494W	9.5187	-0.952522	10.4116	-1.05145	0.0989327	0.00181872	#N/A	#N/A	#N/A
YNL273W	5.71494	-1.51213	10.1682	-1.0782	-0.433923	0.00175744	#N/A	#N/A	#N/A
YOR191W	26.3901	1.52959	32.8847	1.41874	0.110849	0.00157748	#N/A	#N/A	#N/A
YKL109W	13.1267	-0.421713	9.84208	-1.11405	0.692339	0.00142379	#N/A	#N/A	#N/A
YDR006C	23.6011	1.11928	29.3789	1.03339	0.0858837	0.00134857	#N/A	#N/A	#N/A
YIL103W	10.8343	-0.758971	15.1096	-0.535062	-0.223909	0.00103516	#N/A	#N/A	#N/A
YKL149C	9.13331	-1.00922	9.02657	-1.20369	0.194471	0.00100267	#N/A	#N/A	#N/A
YDL146W	14.5145	-0.217549	16.6005	-0.371188	0.153638	0.000992305	#N/A	#N/A	#N/A
YGR093W	9.98197	-0.884366	11.1166	-0.97396	0.0895938	0.00084271	#N/A	#N/A	#N/A
YKL079W	19.0454	0.449032	16.8964	-0.338661	0.787693	0.000811261	#N/A	#N/A	#N/A
YJR031C	22.6028	0.972397	31.7868	1.29806	-0.325661	0.000702114	#N/A	#N/A	#N/A
YBL088C	15.9462	-0.00691504	21.107	0.124167	-0.131082	0.000684252	#N/A	#N/A	#N/A
YCR088W	24.2873	1.22021	21.0427	0.117099	1.10312	0.000389969	#N/A	#N/A	#N/A
YDL084W	8.22329	-1.1431	7.19804	-1.40468	0.261577	0.000313346	#N/A	#N/A	#N/A
YNL272C	22.5304	0.961752	28.4065	0.926502	0.0352497	0.000295953	#N/A	#N/A	#N/A
YJR064W	20.9282	0.726037	28.3177	0.916744	-0.190707	0.000233514	#N/A	#N/A	#N/A
YKL074C	11.6808	-0.634442	15.2137	-0.523617	-0.110826	0.00018772	#N/A	#N/A	#N/A
YDR141C	27.3708	1.67386	33.1213	1.44475	0.229112	0.000187487	#N/A	#N/A	#N/A
YGR061C	25.8607	1.4517	31.8541	1.30545	0.146248	5.77914e-05	#N/A	#N/A	#N/A
YAL019W	24.0904	1.19126	32.2604	1.35012	-0.158856	4.78023e-05	#N/A	#N/A	#N/A
YDR314C	23.1933	1.05928	26.6199	0.730126	0.329151	-0.000309527	#N/A	#N/A	#N/A
YKL212W	24.3471	1.22902	31.9533	1.31636	-0.0873396	-0.000703339	#N/A	#N/A	#N/A
YOR142W	6.55173	-1.38902	8.62095	-1.24828	-0.140744	-0.000790788	#N/A	#N/A	#N/A
YML125C	10.9988	-0.734772	10.089	-1.08691	0.352138	-0.000857298	#N/A	#N/A	#N/A
YCL004W	10.553	-0.800357	8.2768	-1.2861	0.485748	-0.000930499	#N/A	#N/A	#N/A
YMR128W	23.6187	1.12186	29.5087	1.04765	0.0742113	-0.000960216	#N/A	#N/A	#N/A
YMR094W	16.3956	0.0592055	8.87975	-1.21983	1.27903	-0.00114229	#N/A	#N/A	#N/A
YKL205W	24.1365	1.19804	26.7002	0.738954	0.459087	-0.00125303	#N/A	#N/A	#N/A
YLR083C	18.3693	0.349575	24.4101	0.487235	-0.137661	-0.0012825	#N/A	#N/A	#N/A
YHR109W	6.51196	-1.39487	6.67882	-1.46175	0.0668795	-0.00130106	#N/A	#N/A	#N/A
YPL012W	22.1483	0.905539	32.9684	1.42794	-0.522397	-0.00133461	#N/A	#N/A	#N/A
YPR190C	17.7912	0.264515	22.0471	0.227498	0.0370169	-0.0014247	#N/A	#N/A	#N/A
YKR100C	21.019	0.739399	24.9868	0.550626	0.188774	-0.00150165	#N/A	#N/A	#N/A
YJR032W	12.0074	-0.58639	11.8803	-0.89001	0.30362	-0.00168587	#N/A	#N/A	#N/A
YOR245C	7.72998	-1.21568	5.75909	-1.56285	0.347168	-0.00178583	#N/A	#N/A	#N/A
YMR229C	27.7495	1.72958	34.1269	1.55528	0.174297	-0.00187119	#N/A	#N/A	#N/A
YLR244C	11.9539	-0.594251	17.3121	-0.292965	-0.301287	-0.00195715	#N/A	#N/A	#N/A
YER168C	17.8778	0.277269	18.7222	-0.137973	0.415242	-0.00204913	#N/A	#N/A	#N/A
YLR182W	23.219	1.06306	31.9831	1.31964	-0.256584	-0.00210225	#N/A	#N/A	#N/A
YPR085C	8.25873	-1.13789	12.431	-0.829482	-0.308406	-0.00238869	#N/A	#N/A	#N/A
YBR275C	15.2063	-0.115774	17.1742	-0.308119	0.192345	-0.00243949	#N/A	#N/A	#N/A
YAL041W	27.4216	1.68134	29.26	1.02032	0.661021	-0.00252449	#N/A	#N/A	#N/A
YGL086W	23.8854	1.16109	24.6186	0.510149	0.650945	-0.0025581	#N/A	#N/A	#N/A
YOL089C	10.8588	-0.755364	5.44102	-1.59781	0.842443	-0.00258255	#N/A	#N/A	#N/A
YBR221C	12.3439	-0.536888	18.7859	-0.130968	-0.40592	-0.00260039	#N/A	#N/A	#N/A
YML065W	27.8456	1.74371	30.5818	1.16561	0.578098	-0.00268584	#N/A	#N/A	#N/A
YDR148C	13.3729	-0.385493	12.4449	-0.827958	0.442465	-0.00270555	#N/A	#N/A	#N/A
YBR168W	6.06829	-1.46014	6.32561	-1.50057	0.0404306	-0.00304299	#N/A	#N/A	#N/A
YKL057C	23.7745	1.14478	27.9014	0.870989	0.273791	-0.003184	#N/A	#N/A	#N/A
YMR166C	11.2395	-0.699357	14.3289	-0.620868	-0.0784886	-0.00319188	#N/A	#N/A	#N/A
YDR172W	25.3419	1.37537	34.5813	1.60523	-0.229859	-0.0032777	#N/A	#N/A	#N/A
YPR117W	17.5414	0.227778	19.8984	-0.00868573	0.236463	-0.00337703	#N/A	#N/A	#N/A
YFL005W	5.82805	-1.49549	13.2572	-0.738675	-0.756812	-0.00357418	#N/A	#N/A	#N/A
YOR259C	16.3976	0.0595019	19.8256	-0.0166828	0.0761847	-0.00359414	#N/A	#N/A	#N/A
YHR019C	19.3154	0.488754	28.0601	0.888427	-0.399674	-0.00363339	#N/A	#N/A	#N/A
YIL026C	10.184	-0.85465	16.0915	-0.427129	-0.427521	-0.00370035	#N/A	#N/A	#N/A
YGL228W	24.9585	1.31897	29.0498	0.997212	0.321757	-0.0037238	#N/A	#N/A	#N/A
YMR153W	18.1843	0.322351	22.8013	0.310399	0.0119521	-0.00380644	#N/A	#N/A	#N/A
YKL189W	4.8801	-1.63495	6.02499	-1.53362	-0.10133	-0.0038408	#N/A	#N/A	#N/A
YCR032W	9.91012	-0.894937	6.72423	-1.45676	0.561823	-0.00387672	#N/A	#N/A	#N/A
YKL068W	27.0467	1.62619	33.6516	1.50303	0.123156	-0.00427886	#N/A	#N/A	#N/A
YNL059C	25.7164	1.43047	30.0427	1.10635	0.324118	-0.00430926	#N/A	#N/A	#N/A
YBR060C	11.9307	-0.597669	14.5291	-0.598867	0.00119832	-0.00434246	#N/A	#N/A	#N/A
YBR163W	12.9979	-0.440664	12.8809	-0.780034	0.339369	-0.00435552	#N/A	#N/A	#N/A
YKL181W	12.9192	-0.452237	21.3697	0.153032	-0.60527	-0.00435818	#N/A	#N/A	#N/A
YIR025W	10.3509	-0.830084	14.619	-0.588979	-0.241105	-0.00481109	#N/A	#N/A	#N/A
YAL001C	22.0833	0.895968	23.3975	0.375929	0.520039	-0.00482206	#N/A	#N/A	#N/A
YOR158W	12.8208	-0.466718	15.0641	-0.540063	0.0733455	-0.00515096	#N/A	#N/A	#N/A
YPR089W	30.5696	2.14447	32.6534	1.39332	0.751151	-0.00525156	#N/A	#N/A	#N/A
YDL053C	10.4933	-0.809143	7.62111	-1.35818	0.549033	-0.00528367	#N/A	#N/A	#N/A
YKR001C	25.2963	1.36866	28.1691	0.900408	0.468255	-0.00547471	#N/A	#N/A	#N/A
YDR496C	21.3985	0.79522	29.5998	1.05767	-0.262453	-0.00552628	#N/A	#N/A	#N/A
YDR373W	9.0218	-1.02563	4.42863	-1.70909	0.683461	-0.00553801	#N/A	#N/A	#N/A
YAR042W	23.3916	1.08845	33.4067	1.47611	-0.38766	-0.00576574	#N/A	#N/A	#N/A
YDL109C	11.1801	-0.708097	13.2627	-0.738069	0.0299721	-0.00578627	#N/A	#N/A	#N/A
YLR360W	13.946	-0.301183	13.4759	-0.714635	0.413453	-0.00590018	#N/A	#N/A	#N/A
YGL245W	25.9976	1.47183	30.318	1.13662	0.335215	-0.00590203	#N/A	#N/A	#N/A
YBR271W	5.72523	-1.51061	8.93866	-1.21335	-0.29726	-0.006016	#N/A	#N/A	#N/A
YGL155W	6.53779	-1.39107	15.3392	-0.509818	-0.881253	-0.00622851	#N/A	#N/A	#N/A
YLR309C	23.834	1.15353	33.7427	1.51305	-0.359519	-0.00624414	#N/A	#N/A	#N/A
YJL050W	20.1072	0.605256	31.1369	1.22663	-0.621372	-0.00626846	#N/A	#N/A	#N/A
YOR198C	23.5167	1.10685	32.1432	1.33723	-0.23038	-0.00637134	#N/A	#N/A	#N/A
YKR014C	9.57404	-0.94438	11.4167	-0.940971	-0.00340897	-0.00640064	#N/A	#N/A	#N/A
YER163C	8.66767	-1.07772	12.9209	-0.775641	-0.302083	-0.00647088	#N/A	#N/A	#N/A
YGL011C	12.4925	-0.515018	18.476	-0.165035	-0.349982	-0.00653122	#N/A	#N/A	#N/A
YFR041C	8.32349	-1.12836	6.46955	-1.48475	0.356393	-0.00659354	#N/A	#N/A	#N/A
YOL021C	22.4669	0.952408	28.9447	0.985661	-0.0332533	-0.00685648	#N/A	#N/A	#N/A
YDR389W	20.3388	0.639327	33.606	1.49802	-0.858697	-0.00687951	#N/A	#N/A	#N/A
YBR236C	18.122	0.313195	23.135	0.347073	-0.0338784	-0.00720562	#N/A	#N/A	#N/A
YDR333C	24.9436	1.31678	30.9519	1.2063	0.110487	-0.00735159	#N/A	#N/A	#N/A
YOR087W	8.59561	-1.08833	11.4457	-0.937781	-0.150545	-0.00752056	#N/A	#N/A	#N/A
YER110C	26.5232	1.54916	34.0476	1.54656	0.00260485	-0.00753072	#N/A	#N/A	#N/A
YML124C	21.4286	0.799645	30.4181	1.14761	-0.347969	-0.00769302	#N/A	#N/A	#N/A
YBR216C	17.7217	0.254299	17.6368	-0.25727	0.511568	-0.00776026	#N/A	#N/A	#N/A
YEL061C	26.9554	1.61275	25.3499	0.590537	1.02221	-0.00821846	#N/A	#N/A	#N/A
YIR004W	20.87	0.717478	25.2336	0.577746	0.139732	-0.00862139	#N/A	#N/A	#N/A
YOL069W	9.90733	-0.895348	13.9711	-0.660202	-0.235146	-0.00879331	#N/A	#N/A	#N/A
YLR447C	18.103	0.310394	17.1127	-0.314883	0.625277	-0.00919774	#N/A	#N/A	#N/A
YPR133C	19.1057	0.457907	23.8238	0.422789	0.0351181	-0.00924856	#N/A	#N/A	#N/A
YCR034W	18.803	0.41337	22.1162	0.235089	0.178281	-0.00943445	#N/A	#N/A	#N/A
YGR047C	15.3219	-0.0987623	20.1157	0.0152049	-0.113967	-0.00953476	#N/A	#N/A	#N/A
YPL175W	8.676	-1.0765	11.5665	-0.924512	-0.151988	-0.00965141	#N/A	#N/A	#N/A
YER017C	21.4726	0.806129	26.2223	0.686423	0.119706	-0.00985399	#N/A	#N/A	#N/A
YPR189W	19.3484	0.49362	31.4447	1.26046	-0.766838	-0.0101878	#N/A	#N/A	#N/A
YGL119W	9.74024	-0.91993	10.1234	-1.08313	0.163197	-0.0103949	#N/A	#N/A	#N/A
YJR134C	15.9173	-0.0111609	26.1258	0.675817	-0.686978	-0.0107063	#N/A	#N/A	#N/A
YOR048C	27.8286	1.74121	34.4466	1.59042	0.15079	-0.0111762	#N/A	#N/A	#N/A
YIL038C	30.034	2.06566	38.5756	2.04427	0.0213976	-0.0112568	#N/A	#N/A	#N/A
YDR189W	24.6261	1.27007	22.9645	0.328337	0.941736	-0.0115054	#N/A	#N/A	#N/A
YJL029C	20.2515	0.626484	24.5153	0.498792	0.127693	-0.0115275	#N/A	#N/A	#N/A
YKL176C	23.8668	1.15836	31.1964	1.23316	-0.0748064	-0.0118838	#N/A	#N/A	#N/A
YNL292W	9.45663	-0.961654	8.0452	-1.31156	0.349907	-0.0120555	#N/A	#N/A	#N/A
YJR080C	7.20627	-1.29273	5.45341	-1.59645	0.30372	-0.0124456	#N/A	#N/A	#N/A
YDR168W	14.1769	-0.267216	19.5214	-0.0501209	-0.217095	-0.012573	#N/A	#N/A	#N/A
YDR036C	8.88071	-1.04638	10.8604	-1.00212	-0.0442644	-0.0126311	#N/A	#N/A	#N/A
YNL186W	22.2077	0.914272	31.6813	1.28647	-0.372197	-0.0127461	#N/A	#N/A	#N/A
YDR113C	11.6889	-0.633248	5.79707	-1.55867	0.925423	-0.0129977	#N/A	#N/A	#N/A
YGL160W	5.53782	-1.53818	7.47124	-1.37465	-0.163535	-0.0131819	#N/A	#N/A	#N/A
YGR111W	9.18107	-1.00219	15.5335	-0.48846	-0.513734	-0.0133792	#N/A	#N/A	#N/A
YCL017C	15.0119	-0.144363	16.642	-0.366616	0.222254	-0.0133994	#N/A	#N/A	#N/A
YOR129C	17.4899	0.220187	22.2239	0.246925	-0.0267382	-0.0137117	#N/A	#N/A	#N/A
YOR207C	25.0603	1.33395	31.319	1.24664	0.0873099	-0.0137196	#N/A	#N/A	#N/A
YJR003C	12.49	-0.515389	12.4149	-0.831249	0.31586	-0.0137694	#N/A	#N/A	#N/A
YOR232W	13.9184	-0.305244	16.4418	-0.388625	0.0833811	-0.0140406	#N/A	#N/A	#N/A
YKR038C	14.5321	-0.214958	23.4848	0.38552	-0.600479	-0.0140475	#N/A	#N/A	#N/A
YIL158W	8.14779	-1.15421	12.5547	-0.815891	-0.338318	-0.0140672	#N/A	#N/A	#N/A
YOR211C	27.5273	1.6969	28.8832	0.978898	0.717997	-0.0144976	#N/A	#N/A	#N/A
YGR193C	15.4248	-0.0836274	15.7617	-0.463382	0.379754	-0.0147609	#N/A	#N/A	#N/A
YMR160W	21.5883	0.823145	14.8852	-0.559719	1.38286	-0.01484	#N/A	#N/A	#N/A
YOR098C	25.9614	1.46651	37.7663	1.95531	-0.488803	-0.0149858	#N/A	#N/A	#N/A
YJL104W	16.0316	0.00565408	17.5254	-0.269519	0.275173	-0.0150876	#N/A	#N/A	#N/A
YLL010C	13.0925	-0.426746	21.3755	0.153678	-0.580424	-0.0151211	#N/A	#N/A	#N/A
YDR103W	28.0036	1.76695	32.189	1.34227	0.424686	-0.015128	#N/A	#N/A	#N/A
YKR071C	15.8945	-0.0145167	19.463	-0.0565439	0.0420272	-0.0151869	#N/A	#N/A	#N/A
YFR002W	22.604	0.972579	27.5487	0.832219	0.14036	-0.0154213	#N/A	#N/A	#N/A
YKL157W	17.6958	0.25049	21.7481	0.194633	0.0558569	-0.0154307	#N/A	#N/A	#N/A
YER082C	17.4191	0.209783	22.6718	0.296158	-0.0863757	-0.0154784	#N/A	#N/A	#N/A
YMR204C	13.2699	-0.400643	16.009	-0.436198	0.0355546	-0.0155848	#N/A	#N/A	#N/A
YJR068W	7.56243	-1.24033	7.32937	-1.39024	0.149917	-0.0156461	#N/A	#N/A	#N/A
YBR199W	21.0966	0.750816	23.8812	0.429092	0.321724	-0.0156481	#N/A	#N/A	#N/A
YER113C	16.7659	0.113677	23.3446	0.370116	-0.256439	-0.0156941	#N/A	#N/A	#N/A
YNL262W	12.2918	-0.544552	16.5115	-0.38097	-0.163583	-0.016015	#N/A	#N/A	#N/A
YJR005W	21.1723	0.761949	32.1608	1.33917	-0.577223	-0.0169125	#N/A	#N/A	#N/A
YOR171C	19.3094	0.487881	28.3583	0.921212	-0.433331	-0.0169299	#N/A	#N/A	#N/A
YJL013C	15.8758	-0.0172693	18.9942	-0.108069	0.0907996	-0.0173179	#N/A	#N/A	#N/A
YBR057C	21.6863	0.837569	27.0228	0.774414	0.0631554	-0.0177244	#N/A	#N/A	#N/A
YHR012W	9.99779	-0.882039	8.4972	-1.26188	0.379838	-0.0178411	#N/A	#N/A	#N/A
YMR224C	9.03479	-1.02371	7.31082	-1.39228	0.368568	-0.0180869	#N/A	#N/A	#N/A
YDL126C	20.4588	0.65697	28.4266	0.928717	-0.271747	-0.018456	#N/A	#N/A	#N/A
YGR132C	14.5037	-0.219134	18.3536	-0.178481	-0.0406539	-0.0186183	#N/A	#N/A	#N/A
YOL057W	10.9071	-0.748257	24.7861	0.528556	-1.27681	-0.0186312	#N/A	#N/A	#N/A
YLR241W	17.9184	0.283242	22.529	0.28047	0.00277182	-0.0187163	#N/A	#N/A	#N/A
YML004C	13.2869	-0.398148	11.9448	-0.882929	0.484781	-0.0187752	#N/A	#N/A	#N/A
YMR297W	9.07522	-1.01777	6.55011	-1.4759	0.458132	-0.0189232	#N/A	#N/A	#N/A
YPL011C	11.5355	-0.655818	16.702	-0.360027	-0.295791	-0.0190602	#N/A	#N/A	#N/A
YFL022C	17.7971	0.265383	19.2826	-0.0763692	0.341753	-0.0190742	#N/A	#N/A	#N/A
YGR231C	16.4195	0.0627194	24.5769	0.505563	-0.442844	-0.0193236	#N/A	#N/A	#N/A
YHL039W	12.3695	-0.53311	13.0942	-0.756581	0.223471	-0.0193587	#N/A	#N/A	#N/A
YAR014C	24.9005	1.31044	31.5109	1.26774	0.042701	-0.0194738	#N/A	#N/A	#N/A
YOR340C	16.3286	0.0493396	21.1268	0.126335	-0.0769953	-0.0195408	#N/A	#N/A	#N/A
YER127W	17.9033	0.281013	20.4967	0.0570824	0.223931	-0.0195721	#N/A	#N/A	#N/A
YGR211W	15.7008	-0.0430137	22.1009	0.233405	-0.276419	-0.0195924	#N/A	#N/A	#N/A
YOL115W	18.5803	0.38062	24.837	0.534158	-0.153538	-0.019817	#N/A	#N/A	#N/A
YFR052W	15.2874	-0.103833	16.9405	-0.333813	0.22998	-0.0198999	#N/A	#N/A	#N/A
YGR284C	7.77266	-1.2094	8.3616	-1.27678	0.067386	-0.020076	#N/A	#N/A	#N/A
YDR390C	19.4658	0.510887	23.1361	0.347199	0.163688	-0.0201588	#N/A	#N/A	#N/A
YMR024W	24.4551	1.24491	27.3793	0.813597	0.431317	-0.0205987	#N/A	#N/A	#N/A
YAL025C	22.5432	0.963626	26.0735	0.670065	0.29356	-0.0207576	#N/A	#N/A	#N/A
YDR341C	21.4246	0.799057	22.4721	0.274216	0.524841	-0.0207957	#N/A	#N/A	#N/A
YGR187C	10.5165	-0.80573	19.7892	-0.0206832	-0.785047	-0.0208146	#N/A	#N/A	#N/A
YKL007W	6.81779	-1.34988	7.61585	-1.35875	0.00887674	-0.0209318	#N/A	#N/A	#N/A
YKL099C	11.2791	-0.693526	10.2035	-1.07433	0.3808	-0.0211561	#N/A	#N/A	#N/A
YLR106C	28.3964	1.82474	36.2931	1.79338	0.0313593	-0.0211723	#N/A	#N/A	#N/A
YIL125W	17.4176	0.209555	27.1375	0.787017	-0.577462	-0.0212611	#N/A	#N/A	#N/A
YDR310C	28.5559	1.84822	35.0786	1.65988	0.188337	-0.021477	#N/A	#N/A	#N/A
YGL058W	15.0477	-0.139097	15.9754	-0.439887	0.30079	-0.0215774	#N/A	#N/A	#N/A
YPR162C	14.8151	-0.173321	13.6111	-0.699776	0.526455	-0.021736	#N/A	#N/A	#N/A
YFL008W	25.0304	1.32954	31.3111	1.24577	0.0837742	-0.02179	#N/A	#N/A	#N/A
YBR081C	28.0846	1.77888	32.4009	1.36557	0.413313	-0.0219852	#N/A	#N/A	#N/A
YKL015W	19.4327	0.506019	30.7264	1.1815	-0.675484	-0.0220468	#N/A	#N/A	#N/A
YNL313C	21.5131	0.812083	30.3607	1.14131	-0.329226	-0.0220593	#N/A	#N/A	#N/A
YPR022C	26.9758	1.61576	29.8625	1.08655	0.529211	-0.0220875	#N/A	#N/A	#N/A
YJL062W	7.97962	-1.17895	14.6168	-0.589226	-0.589724	-0.0221285	#N/A	#N/A	#N/A
YDR457W	27.8308	1.74154	37.7356	1.95194	-0.210398	-0.0222453	#N/A	#N/A	#N/A
YNL207W	13.8764	-0.311424	17.9619	-0.221539	-0.0898846	-0.0224302	#N/A	#N/A	#N/A
YDR160W	9.704	-0.925261	21.3382	0.149579	-1.07484	-0.0226573	#N/A	#N/A	#N/A
YPL117C	8.37885	-1.12021	7.21458	-1.40286	0.282645	-0.0230102	#N/A	#N/A	#N/A
YGL026C	16.7685	0.114064	21.3226	0.147865	-0.0338011	-0.0232959	#N/A	#N/A	#N/A
YPL078C	7.93305	-1.1858	14.1407	-0.641553	-0.544247	-0.0235528	#N/A	#N/A	#N/A
YGL129C	13.5031	-0.366338	24.9272	0.544069	-0.910407	-0.0236535	#N/A	#N/A	#N/A
YLR089C	5.03263	-1.61251	8.43523	-1.26869	-0.343818	-0.0236932	#N/A	#N/A	#N/A
YPL064C	11.6903	-0.633037	8.82945	-1.22536	0.59232	-0.0238347	#N/A	#N/A	#N/A
YDL060W	21.9689	0.879139	33.9771	1.53881	-0.659671	-0.0238511	#N/A	#N/A	#N/A
YNL283C	15.1699	-0.121127	15.8551	-0.453115	0.331988	-0.0238679	#N/A	#N/A	#N/A
YMR223W	13.3731	-0.385465	14.6099	-0.589985	0.20452	-0.0239383	#N/A	#N/A	#N/A
YGL040C	8.48658	-1.10437	9.98683	-1.09814	-0.00622569	-0.0240791	#N/A	#N/A	#N/A
YPL082C	25.7933	1.44179	34.8893	1.63908	-0.197295	-0.02422	#N/A	#N/A	#N/A
YFL002C	13.8536	-0.314782	14.0286	-0.653881	0.339099	-0.0243763	#N/A	#N/A	#N/A
YMR028W	7.29346	-1.2799	7.7883	-1.3398	0.0599016	-0.0248301	#N/A	#N/A	#N/A
YGL161C	7.07405	-1.31218	12.256	-0.848723	-0.463453	-0.0248388	#N/A	#N/A	#N/A
YPR191W	8.14794	-1.15419	8.18618	-1.29607	0.141878	-0.0251959	#N/A	#N/A	#N/A
YJR049C	8.53226	-1.09765	9.10553	-1.19501	0.0973665	-0.0252736	#N/A	#N/A	#N/A
YIL006W	10.0548	-0.873648	10.5865	-1.03223	0.158582	-0.0252992	#N/A	#N/A	#N/A
YPL100W	16.5202	0.0775262	17.8439	-0.234508	0.312034	-0.0253776	#N/A	#N/A	#N/A
YDR145W	12.0653	-0.57787	17.5672	-0.264921	-0.312949	-0.0256832	#N/A	#N/A	#N/A
YFR031C	23.9952	1.17725	35.7075	1.72901	-0.551766	-0.0257364	#N/A	#N/A	#N/A
YFR039C	8.68873	-1.07463	24.7892	0.528899	-1.60352	-0.0258121	#N/A	#N/A	#N/A
YDR104C	9.62906	-0.936287	14.2386	-0.630797	-0.305489	-0.0259221	#N/A	#N/A	#N/A
YIL075C	28.4152	1.82751	34.7135	1.61975	0.207755	-0.0259913	#N/A	#N/A	#N/A
YMR079W	15.3857	-0.0893672	24.5801	0.505919	-0.595286	-0.0260189	#N/A	#N/A	#N/A
YKR018C	23.4031	1.09014	27.6607	0.844533	0.245611	-0.0261755	#N/A	#N/A	#N/A
YPL140C	9.18417	-1.00174	8.54596	-1.25652	0.254781	-0.0265529	#N/A	#N/A	#N/A
YLR383W	10.6823	-0.781338	15.6109	-0.47996	-0.301378	-0.0266732	#N/A	#N/A	#N/A
YNL138W	17.6174	0.238953	25.3921	0.595166	-0.356214	-0.0267553	#N/A	#N/A	#N/A
YNL136W	16.3798	0.0568795	23.819	0.422254	-0.365374	-0.0268745	#N/A	#N/A	#N/A
YLR002C	12.4084	-0.527391	15.0044	-0.546626	0.0192347	-0.0269481	#N/A	#N/A	#N/A
YMR287C	17.6789	0.248005	17.5851	-0.262953	0.510958	-0.0271271	#N/A	#N/A	#N/A
YJL101C	12.2176	-0.555458	17.081	-0.318362	-0.237095	-0.0274228	#N/A	#N/A	#N/A
YKL039W	21.2178	0.768646	26.2374	0.688083	0.0805638	-0.0275609	#N/A	#N/A	#N/A
YJR089W	19.4885	0.51423	21.7013	0.189488	0.324741	-0.0277344	#N/A	#N/A	#N/A
YBR017C	27.6327	1.7124	34.4636	1.59228	0.120114	-0.0277701	#N/A	#N/A	#N/A
YNR051C	26.3849	1.52881	33.0948	1.44184	0.0869752	-0.0278475	#N/A	#N/A	#N/A
YDL240W	27.4801	1.68994	33.4584	1.4818	0.20814	-0.0278537	#N/A	#N/A	#N/A
YBR235W	7.85928	-1.19665	11.6859	-0.911386	-0.285268	-0.0279231	#N/A	#N/A	#N/A
YBL087C	5.54655	-1.5369	8.58426	-1.25231	-0.284592	-0.0280576	#N/A	#N/A	#N/A
YGL171W	16.7545	0.111998	21.2051	0.134944	-0.022946	-0.0281051	#N/A	#N/A	#N/A
YMR012W	29.4118	1.97414	34.6727	1.61527	0.358869	-0.0282677	#N/A	#N/A	#N/A
YGR119C	21.1422	0.75752	29.1018	1.00294	-0.245415	-0.02829	#N/A	#N/A	#N/A
YLR362W	18.5376	0.374333	16.519	-0.380145	0.754478	-0.0283356	#N/A	#N/A	#N/A
YDR119W	16.3226	0.0484665	17.8623	-0.232485	0.280952	-0.0286782	#N/A	#N/A	#N/A
YOR085W	13.6179	-0.349445	18.15	-0.200861	-0.148584	-0.0288745	#N/A	#N/A	#N/A
YLL021W	30.1781	2.08687	33.7639	1.51538	0.571488	-0.0288788	#N/A	#N/A	#N/A
YJR090C	20.7196	0.695349	37.4694	1.92268	-1.22733	-0.0289049	#N/A	#N/A	#N/A
YOL027C	29.0634	1.92287	30.11	1.11375	0.809126	-0.0289196	#N/A	#N/A	#N/A
YNL161W	21.6963	0.839033	28.8005	0.96981	-0.130777	-0.0290838	#N/A	#N/A	#N/A
YBL104C	26.2911	1.51502	28.9066	0.981472	0.53355	-0.0290964	#N/A	#N/A	#N/A
YPL109C	6.00277	-1.46978	8.25397	-1.28861	-0.181169	-0.0291878	#N/A	#N/A	#N/A
YIL131C	16.0835	0.0132852	21.2607	0.141055	-0.127769	-0.0292006	#N/A	#N/A	#N/A
YGR218W	29.8497	2.03856	35.7657	1.73541	0.303147	-0.0293099	#N/A	#N/A	#N/A
YDR485C	22.2215	0.9163	30.2363	1.12763	-0.211328	-0.0294627	#N/A	#N/A	#N/A
YJL019W	14.4916	-0.220908	17.5949	-0.261877	0.0409694	-0.029521	#N/A	#N/A	#N/A
YOR119C	11.9359	-0.596911	19.3357	-0.0705353	-0.526376	-0.0295229	#N/A	#N/A	#N/A
YCR017C	14.8967	-0.161313	18.7104	-0.139269	-0.0220439	-0.029766	#N/A	#N/A	#N/A
YJL109C	23.5234	1.10784	36.8645	1.85619	-0.748353	-0.0301029	#N/A	#N/A	#N/A
YDL047W	14.0997	-0.278574	12.1558	-0.859737	0.581162	-0.0301834	#N/A	#N/A	#N/A
YPR031W	3.72933	-1.80425	8.65653	-1.24436	-0.559884	-0.0303223	#N/A	#N/A	#N/A
YDL237W	9.29377	-0.985613	8.70683	-1.23884	0.253223	-0.0305958	#N/A	#N/A	#N/A
YGL044C	12.8849	-0.457292	21.2024	0.134651	-0.591944	-0.0307189	#N/A	#N/A	#N/A
YLR436C	29.4264	1.97629	38.9639	2.08695	-0.110659	-0.0308397	#N/A	#N/A	#N/A
YNL130C	11.5718	-0.650471	9.32708	-1.17066	0.520189	-0.0308439	#N/A	#N/A	#N/A
YBR142W	14.5645	-0.210184	22.8059	0.310897	-0.521082	-0.0311036	#N/A	#N/A	#N/A
YFR051C	20.6262	0.681602	25.285	0.583395	0.0982066	-0.0311515	#N/A	#N/A	#N/A
YOL023W	26.3078	1.51748	28.1096	0.893875	0.623604	-0.0313419	#N/A	#N/A	#N/A
YDR434W	11.9197	-0.599284	16.7501	-0.354734	-0.24455	-0.0313967	#N/A	#N/A	#N/A
YOR336W	7.89781	-1.19099	14.818	-0.567109	-0.623877	-0.0315659	#N/A	#N/A	#N/A
YER003C	7.3728	-1.26822	9.1056	-1.195	-0.0732205	-0.0316902	#N/A	#N/A	#N/A
YBR003W	9.00047	-1.02876	9.29902	-1.17374	0.144981	-0.0317575	#N/A	#N/A	#N/A
YKR028W	29.5511	1.99462	15.3872	-0.504543	2.49917	-0.0317841	#N/A	#N/A	#N/A
YNR038W	21.7248	0.843237	28.7491	0.964158	-0.120922	-0.0318402	#N/A	#N/A	#N/A
YKL105C	24.8655	1.30529	24.833	0.53372	0.77157	-0.0318528	#N/A	#N/A	#N/A
YDR351W	28.6183	1.8574	37.4262	1.91793	-0.0605293	-0.0319762	#N/A	#N/A	#N/A
YKL203C	15.6418	-0.0516952	18.9607	-0.111759	0.0600642	-0.0322431	#N/A	#N/A	#N/A
YOR051C	10.3308	-0.833049	12.809	-0.78793	-0.045119	-0.0322941	#N/A	#N/A	#N/A
YDR159W	30.1639	2.08478	36.1659	1.7794	0.305379	-0.0323207	#N/A	#N/A	#N/A
YOR141C	26.4391	1.53679	30.9027	1.20088	0.335909	-0.033054	#N/A	#N/A	#N/A
YDL212W	4.9746	-1.62105	6.96708	-1.43007	-0.19098	-0.0331429	#N/A	#N/A	#N/A
YIL135C	22.5878	0.970194	28.2076	0.904641	0.0655537	-0.0331745	#N/A	#N/A	#N/A
YLR247C	22.6497	0.979301	27.6303	0.841187	0.138114	-0.0331853	#N/A	#N/A	#N/A
YGL256W	17.2239	0.181067	23.5298	0.39047	-0.209403	-0.0332039	#N/A	#N/A	#N/A
YBR025C	7.47486	-1.25321	4.65165	-1.68457	0.431363	-0.0333877	#N/A	#N/A	#N/A
YNL071W	8.62465	-1.08405	15.1434	-0.531347	-0.552707	-0.0336157	#N/A	#N/A	#N/A
YNR052C	24.0331	1.18282	29.1403	1.00717	0.175651	-0.0336783	#N/A	#N/A	#N/A
YKL025C	18.7484	0.405342	22.056	0.228476	0.176866	-0.0337784	#N/A	#N/A	#N/A
YMR014W	24.6577	1.27471	29.7497	1.07414	0.200565	-0.0337992	#N/A	#N/A	#N/A
YDL149W	5.55992	-1.53493	7.21497	-1.40282	-0.132117	-0.034244	#N/A	#N/A	#N/A
YDR182W	19.4572	0.50962	22.491	0.276289	0.233331	-0.0343011	#N/A	#N/A	#N/A
YHR154W	10.804	-0.763433	16.3336	-0.400517	-0.362916	-0.034641	#N/A	#N/A	#N/A
YBR043C	23.0956	1.0449	27.1476	0.788136	0.256767	-0.0348421	#N/A	#N/A	#N/A
YLR026C	21.4742	0.806357	21.8572	0.206619	0.599738	-0.0350378	#N/A	#N/A	#N/A
YPL212C	26.1031	1.48735	33.8915	1.52941	-0.0420553	-0.0351012	#N/A	#N/A	#N/A
YGR186W	26.9074	1.60569	39.19	2.1118	-0.506111	-0.0355263	#N/A	#N/A	#N/A
YNL290W	5.11425	-1.6005	6.10783	-1.52451	-0.0759898	-0.0356694	#N/A	#N/A	#N/A
YKL209C	12.4837	-0.516309	23.2642	0.361274	-0.877583	-0.0359463	#N/A	#N/A	#N/A
YOL034W	18.6936	0.397285	27.6067	0.83859	-0.441305	-0.0363324	#N/A	#N/A	#N/A
YDR361C	5.72856	-1.51012	5.57839	-1.58271	0.0725838	-0.0364843	#N/A	#N/A	#N/A
YBR034C	10.1888	-0.853934	9.62686	-1.13771	0.283774	-0.0365453	#N/A	#N/A	#N/A
YDL143W	17.2482	0.184637	33.262	1.46021	-1.27557	-0.0365928	#N/A	#N/A	#N/A
YDR190C	21.0172	0.739123	28.1788	0.90148	-0.162357	-0.036723	#N/A	#N/A	#N/A
YLR127C	11.2237	-0.701678	8.01124	-1.31529	0.613616	-0.0368863	#N/A	#N/A	#N/A
YGR210C	7.07312	-1.31231	9.47676	-1.15421	-0.158106	-0.0369739	#N/A	#N/A	#N/A
YIL095W	12.8664	-0.460009	21.6716	0.186218	-0.646227	-0.0373027	#N/A	#N/A	#N/A
YLR412W	10.7581	-0.770178	12.8118	-0.787622	0.0174444	-0.0377437	#N/A	#N/A	#N/A
YGR235C	6.27168	-1.43022	6.22257	-1.5119	0.0816798	-0.0377677	#N/A	#N/A	#N/A
YLR291C	12.0143	-0.585373	17.191	-0.306276	-0.279097	-0.0382073	#N/A	#N/A	#N/A
YGR033C	7.08413	-1.31069	4.73247	-1.67569	0.364995	-0.0382601	#N/A	#N/A	#N/A
YMR033W	22.4264	0.946445	27.6423	0.842503	0.103942	-0.0382916	#N/A	#N/A	#N/A
YOR067C	6.94252	-1.33153	12.1292	-0.862652	-0.468874	-0.0383427	#N/A	#N/A	#N/A
YPL206C	9.63587	-0.935284	5.84454	-1.55345	0.618169	-0.0387504	#N/A	#N/A	#N/A
YDR298C	14.0409	-0.287215	18.3454	-0.179382	-0.107833	-0.0388377	#N/A	#N/A	#N/A
YOR362C	14.4685	-0.224309	14.777	-0.571617	0.347307	-0.0389086	#N/A	#N/A	#N/A
YKR022C	9.7764	-0.91461	12.6294	-0.807681	-0.106929	-0.0389277	#N/A	#N/A	#N/A
YLL008W	20.815	0.709385	35.2393	1.67755	-0.968162	-0.0390144	#N/A	#N/A	#N/A
YGR097W	14.8013	-0.175355	22.7991	0.310151	-0.485506	-0.0391537	#N/A	#N/A	#N/A
YGR163W	5.97536	-1.47382	7.42442	-1.3798	-0.09402	-0.039159	#N/A	#N/A	#N/A
YBR279W	22.7381	0.992304	30.78	1.1874	-0.195092	-0.0392339	#N/A	#N/A	#N/A
YOR269W	7.43226	-1.25948	10.8784	-1.00014	-0.25934	-0.0392814	#N/A	#N/A	#N/A
YMR125W	29.4575	1.98086	36.6879	1.83678	0.144084	-0.0395469	#N/A	#N/A	#N/A
YKL094W	10.1136	-0.864997	12.674	-0.80277	-0.0622274	-0.0395485	#N/A	#N/A	#N/A
YLR370C	6.88683	-1.33972	8.48484	-1.26324	-0.0764828	-0.0397468	#N/A	#N/A	#N/A
YPR034W	19.1877	0.469967	29.7204	1.07092	-0.600957	-0.0397556	#N/A	#N/A	#N/A
YOR022C	8.7023	-1.07263	6.22409	-1.51173	0.439103	-0.0398193	#N/A	#N/A	#N/A
YDR291W	19.5448	0.522513	27.5851	0.836225	-0.313712	-0.0398432	#N/A	#N/A	#N/A
YNL075W	7.31771	-1.27633	15.3686	-0.506585	-0.769745	-0.0398976	#N/A	#N/A	#N/A
YOL098C	20.7509	0.699953	30.9106	1.20176	-0.501803	-0.0399482	#N/A	#N/A	#N/A
YGR046W	14.209	-0.262496	19.6807	-0.0326176	-0.229878	-0.0399587	#N/A	#N/A	#N/A
YBR243C	4.76253	-1.65225	8.55958	-1.25502	-0.397225	-0.0402056	#N/A	#N/A	#N/A
YIR011C	7.71436	-1.21797	18.5703	-0.154664	-1.06331	-0.0402247	#N/A	#N/A	#N/A
YDR452W	20.8475	0.714164	26.7395	0.743273	-0.0291083	-0.0402647	#N/A	#N/A	#N/A
YDL006W	10.7798	-0.766993	9.6089	-1.13968	0.37269	-0.0403215	#N/A	#N/A	#N/A
YPL243W	24.461	1.24578	29.7736	1.07677	0.169006	-0.040368	#N/A	#N/A	#N/A
YFL042C	10.3755	-0.826472	10.1521	-1.07997	0.2535	-0.0405155	#N/A	#N/A	#N/A
YNL238W	23.0014	1.03105	27.9907	0.880801	0.150245	-0.0406052	#N/A	#N/A	#N/A
YJL039C	26.2024	1.50197	34.5936	1.60657	-0.104605	-0.0406372	#N/A	#N/A	#N/A
YBR129C	10.6646	-0.783937	5.83722	-1.55426	0.770321	-0.0407042	#N/A	#N/A	#N/A
YMR129W	25.3609	1.37817	35.5001	1.70621	-0.32804	-0.0408863	#N/A	#N/A	#N/A
YPL210C	28.8526	1.89186	34.6348	1.61111	0.280749	-0.0409053	#N/A	#N/A	#N/A
YNL127W	16.4903	0.0731318	18.2828	-0.186272	0.259403	-0.0410924	#N/A	#N/A	#N/A
YDL145C	29.5376	1.99264	34.1481	1.55761	0.435029	-0.0415035	#N/A	#N/A	#N/A
YBR049C	30.1312	2.07997	31.0169	1.21343	0.86654	-0.0415941	#N/A	#N/A	#N/A
YOL010W	14.5569	-0.21131	14.6736	-0.582983	0.371673	-0.0418399	#N/A	#N/A	#N/A
YLR287C	11.6308	-0.641792	13.5055	-0.711376	0.0695841	-0.0419057	#N/A	#N/A	#N/A
YIL048W	23.7328	1.13864	30.422	1.14804	-0.00940416	-0.0419551	#N/A	#N/A	#N/A
YPL103C	14.8846	-0.163096	15.5713	-0.484307	0.321211	-0.0420996	#N/A	#N/A	#N/A
YFR013W	21.1592	0.760014	27.1501	0.788407	-0.0283925	-0.0421688	#N/A	#N/A	#N/A
YJL207C	22.6372	0.977464	34.0816	1.5503	-0.572836	-0.0423053	#N/A	#N/A	#N/A
YER105C	29.5879	2.00005	33.2195	1.45554	0.54451	-0.0424741	#N/A	#N/A	#N/A
YKR056W	16.2936	0.0441912	23.7509	0.414779	-0.370588	-0.0426608	#N/A	#N/A	#N/A
YPL093W	23.0753	1.04191	34.0997	1.55229	-0.510377	-0.0427836	#N/A	#N/A	#N/A
YJL111W	22.4978	0.956946	31.7818	1.29751	-0.340565	-0.0428889	#N/A	#N/A	#N/A
YOR363C	12.764	-0.475077	19.1546	-0.0904425	-0.384634	-0.0429819	#N/A	#N/A	#N/A
YMR010W	14.1591	-0.269829	16.0857	-0.427773	0.157945	-0.0432557	#N/A	#N/A	#N/A
YHR068W	10.3145	-0.835441	10.4791	-1.04404	0.208597	-0.0433849	#N/A	#N/A	#N/A
YDR319C	8.73978	-1.06712	11.4458	-0.937778	-0.129337	-0.0436631	#N/A	#N/A	#N/A
YNL139C	25.0531	1.33288	34.7766	1.62669	-0.293809	-0.0444502	#N/A	#N/A	#N/A
YGL139W	19.0283	0.446519	22.569	0.284856	0.161663	-0.0445074	#N/A	#N/A	#N/A
YMR049C	22.4476	0.949563	27.2526	0.799672	0.149891	-0.0445642	#N/A	#N/A	#N/A
YLL003W	16.377	0.0564683	23.9307	0.434533	-0.378065	-0.0445661	#N/A	#N/A	#N/A
YJR152W	6.40718	-1.41029	19.4408	-0.0589841	-1.3513	-0.0445873	#N/A	#N/A	#N/A
YGR212W	7.94674	-1.18379	8.67417	-1.24243	0.0586383	-0.0446298	#N/A	#N/A	#N/A
YPR041W	25.5107	1.4002	34.1001	1.55233	-0.152129	-0.0447435	#N/A	#N/A	#N/A
YDR465C	5.29988	-1.57319	6.53775	-1.47726	-0.0959359	-0.0448114	#N/A	#N/A	#N/A
YBR220C	9.15035	-1.00671	9.98826	-1.09798	0.0912711	-0.0449551	#N/A	#N/A	#N/A
YOR076C	21.7746	0.850556	22.1587	0.239767	0.61079	-0.0450409	#N/A	#N/A	#N/A
YIL129C	25.0864	1.33778	32.5752	1.38472	-0.0469379	-0.0453278	#N/A	#N/A	#N/A
YKR081C	17.4766	0.218239	21.8831	0.209472	0.00876673	-0.0453586	#N/A	#N/A	#N/A
YNL064C	8.02174	-1.17275	6.05297	-1.53054	0.35779	-0.0453948	#N/A	#N/A	#N/A
YJL174W	16.824	0.122225	23.1354	0.347122	-0.224898	-0.0454216	#N/A	#N/A	#N/A
YOR250C	9.04914	-1.0216	8.22771	-1.2915	0.269898	-0.0455046	#N/A	#N/A	#N/A
YJL081C	12.4808	-0.516734	18.2007	-0.195296	-0.321439	-0.0455165	#N/A	#N/A	#N/A
YJR052W	8.80466	-1.05757	10.5396	-1.03738	-0.0201903	-0.0471431	#N/A	#N/A	#N/A
YHR077C	28.1162	1.78353	33.7472	1.51354	0.269987	-0.0473107	#N/A	#N/A	#N/A
YGR113W	13.33	-0.391801	21.0359	0.116342	-0.508143	-0.047334	#N/A	#N/A	#N/A
YBL020W	7.93532	-1.18547	7.60155	-1.36033	0.174859	-0.0473393	#N/A	#N/A	#N/A
YGL066W	24.9421	1.31655	34.7828	1.62738	-0.310825	-0.0474095	#N/A	#N/A	#N/A
YNR021W	16.5692	0.0847402	26.4801	0.714761	-0.630021	-0.0474208	#N/A	#N/A	#N/A
YJL036W	12.8656	-0.460129	23.5334	0.390866	-0.850995	-0.047469	#N/A	#N/A	#N/A
YGL206C	25.1952	1.35379	40.8611	2.29549	-0.941705	-0.0480124	#N/A	#N/A	#N/A
YEL062W	8.39118	-1.1184	10.2368	-1.07066	-0.0477403	-0.0480476	#N/A	#N/A	#N/A
YPL050C	24.2394	1.21318	27.6912	0.847886	0.365293	-0.0480693	#N/A	#N/A	#N/A
YGR071C	20.9293	0.726191	18.8105	-0.128267	0.854459	-0.0487514	#N/A	#N/A	#N/A
YOR301W	7.03154	-1.31843	7.99353	-1.31724	-0.00118952	-0.0488219	#N/A	#N/A	#N/A
YLR019W	13.4384	-0.375854	18.2239	-0.192741	-0.183113	-0.0488437	#N/A	#N/A	#N/A
YLR208W	10.8463	-0.757209	12.3645	-0.836789	0.0795799	-0.0489356	#N/A	#N/A	#N/A
YOR143C	11.9801	-0.590404	10.5105	-1.04058	0.450172	-0.048958	#N/A	#N/A	#N/A
YGR267C	7.52689	-1.24556	9.15469	-1.18961	-0.0559476	-0.049013	#N/A	#N/A	#N/A
YNR039C	18.6366	0.388898	25.8324	0.643568	-0.25467	-0.0491338	#N/A	#N/A	#N/A
YGR162W	25.4936	1.39769	38.8291	2.07213	-0.67444	-0.049483	#N/A	#N/A	#N/A
YMR089C	21.539	0.8159	24.5128	0.498519	0.317381	-0.0495081	#N/A	#N/A	#N/A
YBR136W	8.64593	-1.08092	5.59699	-1.58066	0.499739	-0.0495084	#N/A	#N/A	#N/A
YDR348C	22.4244	0.946152	34.05	1.54683	-0.600675	-0.0496355	#N/A	#N/A	#N/A
YPL136W	23.5731	1.11515	35.0726	1.65923	-0.544077	-0.0496497	#N/A	#N/A	#N/A
YPL169C	24.1266	1.19658	29.6964	1.06829	0.128286	-0.0497003	#N/A	#N/A	#N/A
YNL256W	15.1294	-0.127082	20.4154	0.0481379	-0.17522	-0.0497142	#N/A	#N/A	#N/A
YLR117C	15.5087	-0.0712723	17.651	-0.255719	0.184447	-0.0498889	#N/A	#N/A	#N/A
YPL167C	11.8134	-0.614933	16.6661	-0.363968	-0.250965	-0.0509282	#N/A	#N/A	#N/A
YOR194C	15.0438	-0.139669	18.455	-0.167335	0.0276661	-0.0509577	#N/A	#N/A	#N/A
YHR111W	7.91395	-1.18861	8.78644	-1.23009	0.0414756	-0.0510068	#N/A	#N/A	#N/A
YHR107C	20.8599	0.715987	26.8315	0.753382	-0.0373952	-0.0513638	#N/A	#N/A	#N/A
YCR028C	9.22624	-0.995548	15.9718	-0.44029	-0.555258	-0.0515602	#N/A	#N/A	#N/A
YOR109W	28.1611	1.79013	31.0169	1.21343	0.576694	-0.0518889	#N/A	#N/A	#N/A
YBR205W	7.29972	-1.27898	6.8645	-1.44134	0.162364	-0.0520135	#N/A	#N/A	#N/A
YOL148C	20.9001	0.721899	25.3386	0.589289	0.13261	-0.0522261	#N/A	#N/A	#N/A
YHR207C	9.292	-0.985875	9.30061	-1.17357	0.187695	-0.0523121	#N/A	#N/A	#N/A
YLR082C	14.9177	-0.158223	20.0071	0.00326892	-0.161492	-0.052419	#N/A	#N/A	#N/A
YGR005C	12.8128	-0.467898	15.5417	-0.487564	0.0196654	-0.0528837	#N/A	#N/A	#N/A
YNR061C	7.00306	-1.32262	11.0023	-0.986528	-0.336093	-0.0528919	#N/A	#N/A	#N/A
YEL006W	18.9032	0.428124	9.97419	-1.09953	1.52765	-0.0530379	#N/A	#N/A	#N/A
YPR072W	26.9521	1.61227	32.147	1.33765	0.274616	-0.0535887	#N/A	#N/A	#N/A
YDR238C	28.9608	1.90778	19.1432	-0.0916961	1.99948	-0.0537312	#N/A	#N/A	#N/A
YLR188W	5.86512	-1.49003	21.397	0.156041	-1.64607	-0.0537433	#N/A	#N/A	#N/A
YOR304W	26.1855	1.49948	29.1413	1.00727	0.492208	-0.0537556	#N/A	#N/A	#N/A
YLR221C	8.21055	-1.14498	11.0266	-0.983852	-0.161123	-0.0542902	#N/A	#N/A	#N/A
YBR238C	16.4102	0.061346	23.5996	0.398138	-0.336792	-0.0543188	#N/A	#N/A	#N/A
YDR388W	13.0175	-0.437786	16.9349	-0.334421	-0.103365	-0.0544224	#N/A	#N/A	#N/A
YDR184C	4.82918	-1.64244	6.66602	-1.46316	-0.179283	-0.0545687	#N/A	#N/A	#N/A
YNR016C	25.2618	1.36359	34.4917	1.59538	-0.231788	-0.054583	#N/A	#N/A	#N/A
YNL288W	16.5017	0.0748045	22.542	0.281897	-0.207092	-0.0546306	#N/A	#N/A	#N/A
YGR188C	9.59009	-0.94202	18.9143	-0.116856	-0.825164	-0.0546481	#N/A	#N/A	#N/A
YOR168W	26.7791	1.58682	33.8182	1.52135	0.0654676	-0.0546676	#N/A	#N/A	#N/A
YBR095C	16.439	0.0655897	24.6425	0.51278	-0.447191	-0.0549257	#N/A	#N/A	#N/A
YDR490C	4.93724	-1.62654	10.4884	-1.04301	-0.583528	-0.055193	#N/A	#N/A	#N/A
YER144C	18.3418	0.345529	20.3495	0.0408998	0.30463	-0.0552465	#N/A	#N/A	#N/A
YEL056W	12.6104	-0.497675	17.7239	-0.247702	-0.249973	-0.0553596	#N/A	#N/A	#N/A
YJL140W	7.61801	-1.23215	8.10141	-1.30538	0.0732328	-0.0555963	#N/A	#N/A	#N/A
YKL078W	7.14489	-1.30175	12.4338	-0.829174	-0.472581	-0.0558335	#N/A	#N/A	#N/A
YPL105C	27.311	1.66506	32.6714	1.39529	0.269772	-0.0559527	#N/A	#N/A	#N/A
YGR056W	23.844	1.15501	35.265	1.68038	-0.525373	-0.0560775	#N/A	#N/A	#N/A
YOL073C	9.64761	-0.933557	7.24343	-1.39969	0.466132	-0.0561318	#N/A	#N/A	#N/A
YOR086C	25.5718	1.4092	32.6165	1.38926	0.0199395	-0.0561423	#N/A	#N/A	#N/A
YOL063C	24.1824	1.20479	29.9861	1.10014	0.104656	-0.0561668	#N/A	#N/A	#N/A
YKL154W	8.96046	-1.03465	10.3768	-1.05528	0.0206317	-0.0563602	#N/A	#N/A	#N/A
YOR205C	19.8073	0.561125	22.6859	0.297713	0.263411	-0.0563992	#N/A	#N/A	#N/A
YHR036W	7.66672	-1.22498	8.46344	-1.26559	0.0406055	-0.0564687	#N/A	#N/A	#N/A
YPR010C	25.484	1.39628	34.292	1.57343	-0.177143	-0.0564719	#N/A	#N/A	#N/A
YBR146W	15.1622	-0.122261	13.7215	-0.687632	0.565371	-0.0565929	#N/A	#N/A	#N/A
YNL189W	24.029	1.18222	28.3564	0.921	0.261224	-0.0567321	#N/A	#N/A	#N/A
YDR322W	13.4795	-0.369807	14.7944	-0.5697	0.199892	-0.0568026	#N/A	#N/A	#N/A
YNL293W	9.93983	-0.890566	10.2397	-1.07035	0.179781	-0.0568821	#N/A	#N/A	#N/A
YDL137W	4.53126	-1.68627	7.80851	-1.33758	-0.348692	-0.0569182	#N/A	#N/A	#N/A
YLR372W	12.0972	-0.573174	21.5011	0.167485	-0.740659	-0.0569649	#N/A	#N/A	#N/A
YBR097W	19.3445	0.493034	18.8309	-0.126023	0.619058	-0.057198	#N/A	#N/A	#N/A
YGL082W	10.1161	-0.864639	9.23581	-1.18069	0.316053	-0.0572685	#N/A	#N/A	#N/A
YNL085W	27.2565	1.65705	38.0667	1.98833	-0.331287	-0.0574914	#N/A	#N/A	#N/A
YLR384C	29.1184	1.93097	36.6097	1.82819	0.102777	-0.0578016	#N/A	#N/A	#N/A
YBL056W	20.8279	0.711279	28.4909	0.935782	-0.224502	-0.0579046	#N/A	#N/A	#N/A
YGL137W	24.3211	1.2252	33.2319	1.4569	-0.231704	-0.0579582	#N/A	#N/A	#N/A
YDR416W	17.9225	0.283841	19.3814	-0.0655082	0.349349	-0.0579669	#N/A	#N/A	#N/A
YGR106C	11.0066	-0.733626	10.099	-1.08581	0.352182	-0.0581278	#N/A	#N/A	#N/A
YGL207W	25.4281	1.38805	32.4453	1.37045	0.0176057	-0.0582154	#N/A	#N/A	#N/A
YML103C	24.6751	1.27728	35.3461	1.68929	-0.412013	-0.0586371	#N/A	#N/A	#N/A
YNL284C	9.47082	-0.959566	13.339	-0.729675	-0.229891	-0.0586807	#N/A	#N/A	#N/A
YIR008C	10.5087	-0.806879	14.1974	-0.635329	-0.17155	-0.058725	#N/A	#N/A	#N/A
YJL149W	14.8984	-0.161072	17.2094	-0.304258	0.143187	-0.0588616	#N/A	#N/A	#N/A
YBR084C-A	5.29174	-1.57439	6.38164	-1.49442	-0.0799731	-0.0589201	#N/A	#N/A	#N/A
YPL085W	26.502	1.54605	40.6826	2.27586	-0.729813	-0.058927	#N/A	#N/A	#N/A
YCR035C	13.2933	-0.397209	17.6984	-0.250507	-0.146702	-0.0590696	#N/A	#N/A	#N/A
YKL017C	11.2555	-0.697011	15.9012	-0.448045	-0.248966	-0.0591389	#N/A	#N/A	#N/A
YDR329C	18.7056	0.399053	28.774	0.966898	-0.567845	-0.0592925	#N/A	#N/A	#N/A
YCL028W	9.82989	-0.90674	11.6906	-0.910869	0.00412885	-0.0593958	#N/A	#N/A	#N/A
YKL179C	28.4768	1.83657	32.6285	1.39058	0.44599	-0.0594307	#N/A	#N/A	#N/A
YJL148W	11.482	-0.66369	14.9215	-0.555736	-0.107954	-0.0594774	#N/A	#N/A	#N/A
YIL143C	21.5601	0.818991	24.4471	0.491296	0.327695	-0.0595387	#N/A	#N/A	#N/A
YPR084W	17.1785	0.174388	18.7816	-0.131445	0.305833	-0.0595575	#N/A	#N/A	#N/A
YNL330C	17.0585	0.156721	21.5447	0.172276	-0.0155544	-0.0596415	#N/A	#N/A	#N/A
YCR053W	22.0591	0.892412	32.3025	1.35475	-0.462334	-0.0597901	#N/A	#N/A	#N/A
YKL042W	11.5342	-0.656003	11.3716	-0.945929	0.289927	-0.0598675	#N/A	#N/A	#N/A
YKL012W	21.437	0.800888	23.6042	0.398651	0.402238	-0.0599565	#N/A	#N/A	#N/A
YLR214W	9.54378	-0.948833	9.40954	-1.1616	0.212763	-0.0600829	#N/A	#N/A	#N/A
YLR096W	20.2359	0.62419	31.8742	1.30766	-0.683474	-0.0601206	#N/A	#N/A	#N/A
YBR058C	22.2302	0.917585	26.1657	0.6802	0.237385	-0.060174	#N/A	#N/A	#N/A
YNL137C	21.302	0.781033	19.256	-0.0792941	0.860327	-0.0604941	#N/A	#N/A	#N/A
YBR039W	13.5976	-0.352443	15.3963	-0.503542	0.151099	-0.0606278	#N/A	#N/A	#N/A
YJL061W	22.0219	0.886935	31.2661	1.24083	-0.353893	-0.0607091	#N/A	#N/A	#N/A
YKL080W	9.59275	-0.941628	14.8602	-0.562473	-0.379155	-0.06078	#N/A	#N/A	#N/A
YML020W	16.5953	0.0885859	21.5263	0.170249	-0.0816629	-0.060973	#N/A	#N/A	#N/A
YKL021C	11.3221	-0.687205	26.0833	0.671147	-1.35835	-0.0609763	#N/A	#N/A	#N/A
YHR051W	9.28279	-0.98723	9.50387	-1.15123	0.163998	-0.0610445	#N/A	#N/A	#N/A
YFR028C	25.2141	1.35657	33.2673	1.4608	-0.104222	-0.0611071	#N/A	#N/A	#N/A
YOR091W	16.5397	0.0804039	15.8225	-0.456701	0.537105	-0.0614738	#N/A	#N/A	#N/A
YGR058W	5.93064	-1.48039	3.94488	-1.76226	0.281865	-0.0615844	#N/A	#N/A	#N/A
YER016W	12.097	-0.573202	20.7584	0.0858424	-0.659045	-0.061751	#N/A	#N/A	#N/A
YGR054W	22.1698	0.9087	23.0362	0.336218	0.572482	-0.0617641	#N/A	#N/A	#N/A
YPR169W	18.9211	0.430745	26.2049	0.684512	-0.253767	-0.0618481	#N/A	#N/A	#N/A
YNL084C	12.0113	-0.585815	23.8715	0.428032	-1.01385	-0.0618629	#N/A	#N/A	#N/A
YFL007W	15.8738	-0.0175584	19.0096	-0.106383	0.088825	-0.0618998	#N/A	#N/A	#N/A
YAL051W	16.5686	0.084646	21.4266	0.159297	-0.0746505	-0.0620917	#N/A	#N/A	#N/A
YNR059W	18.6265	0.387416	21.8061	0.201005	0.18641	-0.0621237	#N/A	#N/A	#N/A
YAR002W	10.9328	-0.744485	16.2512	-0.409582	-0.334903	-0.0623658	#N/A	#N/A	#N/A
YDR346C	21.838	0.859888	29.2501	1.01923	-0.159342	-0.062435	#N/A	#N/A	#N/A
YOR335C	28.2154	1.79812	36.2193	1.78527	0.0128503	-0.0625995	#N/A	#N/A	#N/A
YDR099W	19.6872	0.543456	15.0844	-0.537825	1.08128	-0.0626717	#N/A	#N/A	#N/A
YPR004C	14.6529	-0.197176	16.3567	-0.397983	0.200807	-0.0630083	#N/A	#N/A	#N/A
YNL212W	23.2591	1.06896	33.6039	1.49779	-0.428831	-0.063171	#N/A	#N/A	#N/A
YHR032W	7.47728	-1.25285	9.88397	-1.10945	-0.143407	-0.0633536	#N/A	#N/A	#N/A
YOR267C	19.5077	0.517057	28.2351	0.907661	-0.390604	-0.0634903	#N/A	#N/A	#N/A
YER008C	32.1608	2.37856	37.9279	1.97308	0.405479	-0.0639026	#N/A	#N/A	#N/A
YMR218C	22.3584	0.936448	23.3323	0.368756	0.567691	-0.0639635	#N/A	#N/A	#N/A
YPR187W	15.0432	-0.13977	9.52286	-1.14914	1.00937	-0.0642351	#N/A	#N/A	#N/A
YOR034C	9.19348	-1.00037	6.89874	-1.43758	0.437209	-0.0642803	#N/A	#N/A	#N/A
YIL063C	9.1227	-1.01078	11.4524	-0.937051	-0.0737312	-0.0643879	#N/A	#N/A	#N/A
YOL068C	25.2855	1.36707	27.658	0.844235	0.522839	-0.0645167	#N/A	#N/A	#N/A
YDR221W	18.6937	0.397301	18.6333	-0.147738	0.545038	-0.0645285	#N/A	#N/A	#N/A
YBL034C	25.2599	1.3633	28.902	0.980966	0.382338	-0.0646013	#N/A	#N/A	#N/A
YPL178W	6.02873	-1.46596	8.20564	-1.29393	-0.172037	-0.0649477	#N/A	#N/A	#N/A
YOR307C	15.6113	-0.0561845	22.7091	0.300257	-0.356441	-0.0650468	#N/A	#N/A	#N/A
YDR068W	5.79854	-1.49983	7.21689	-1.40261	-0.0972224	-0.065282	#N/A	#N/A	#N/A
YGR007W	13.3973	-0.381904	14.0198	-0.654842	0.272938	-0.0653105	#N/A	#N/A	#N/A
YHR199C	7.4123	-1.26241	9.75592	-1.12352	-0.13889	-0.0654849	#N/A	#N/A	#N/A
YPL254W	15.7976	-0.0287762	16.3969	-0.393563	0.364787	-0.0656064	#N/A	#N/A	#N/A
YLR207W	10.2105	-0.850743	21.827	0.203301	-1.05404	-0.065733	#N/A	#N/A	#N/A
YGL194C	11.5021	-0.660721	15.0659	-0.539862	-0.120858	-0.0662349	#N/A	#N/A	#N/A
YOR320C	15.0085	-0.144868	16.9439	-0.333433	0.188565	-0.0662828	#N/A	#N/A	#N/A
YGR003W	16.7392	0.109754	18.37	-0.176687	0.286441	-0.0663074	#N/A	#N/A	#N/A
YFR016C	19.2947	0.485716	26.8629	0.756837	-0.27112	-0.0663695	#N/A	#N/A	#N/A
YIL022W	22.1286	0.90264	33.833	1.52297	-0.62033	-0.0667024	#N/A	#N/A	#N/A
YBR143C	18.1985	0.324437	25.11	0.564163	-0.239726	-0.0667063	#N/A	#N/A	#N/A
YKR101W	11.852	-0.609247	13.1061	-0.75528	0.146034	-0.0667841	#N/A	#N/A	#N/A
YOR137C	15.544	-0.0660827	18.3535	-0.178497	0.112414	-0.06684	#N/A	#N/A	#N/A
YDR362C	9.17386	-1.00325	12.3681	-0.8364	-0.166854	-0.0673593	#N/A	#N/A	#N/A
YKL070W	24.1681	1.20269	19.2563	-0.0792644	1.28195	-0.0674925	#N/A	#N/A	#N/A
YDL167C	21.9683	0.879055	27.8616	0.866608	0.0124467	-0.0675363	#N/A	#N/A	#N/A
YCL034W	12.5334	-0.509007	13.5914	-0.701934	0.192927	-0.067553	#N/A	#N/A	#N/A
YDL122W	28.517	1.84249	34.8967	1.63989	0.202598	-0.0676809	#N/A	#N/A	#N/A
YDR331W	13.2294	-0.406608	19.1278	-0.0933883	-0.313219	-0.0676826	#N/A	#N/A	#N/A
YGR002C	10.7292	-0.774432	14.6193	-0.588946	-0.185486	-0.067762	#N/A	#N/A	#N/A
YAL007C	10.8869	-0.751229	11.0238	-0.984165	0.232936	-0.0677942	#N/A	#N/A	#N/A
YFR009W	30.0127	2.06254	40.5194	2.25793	-0.195384	-0.0679208	#N/A	#N/A	#N/A
YLR310C	29.0334	1.91847	29.8723	1.08762	0.830847	-0.0680104	#N/A	#N/A	#N/A
YDR318W	7.09165	-1.30959	8.16708	-1.29816	-0.0114231	-0.068259	#N/A	#N/A	#N/A
YNL247W	26.4422	1.53725	33.1721	1.45033	0.0869166	-0.0682885	#N/A	#N/A	#N/A
YFR024C-A	17.9577	0.28901	22.1668	0.240647	0.0483628	-0.0685034	#N/A	#N/A	#N/A
YEL052W	13.2484	-0.403818	17.8419	-0.234729	-0.16909	-0.0686645	#N/A	#N/A	#N/A
YOR021C	11.1809	-0.707973	6.34344	-1.49861	0.790642	-0.0686882	#N/A	#N/A	#N/A
YDL224C	27.7159	1.72464	32.5782	1.38504	0.339597	-0.0688477	#N/A	#N/A	#N/A
YGL111W	18.3649	0.348929	25.4451	0.600999	-0.25207	-0.0689701	#N/A	#N/A	#N/A
YHR099W	31.368	2.26193	38.3007	2.01405	0.24788	-0.0692027	#N/A	#N/A	#N/A
YLR422W	18.3272	0.343371	28.4672	0.933182	-0.589811	-0.069544	#N/A	#N/A	#N/A
YLR071C	25.1154	1.34205	30.9154	1.20228	0.139773	-0.0696588	#N/A	#N/A	#N/A
YMR219W	16.5706	0.0849491	30.8774	1.1981	-1.11315	-0.0697465	#N/A	#N/A	#N/A
YLR424W	9.38124	-0.972746	11.1551	-0.969729	-0.00301707	-0.0700203	#N/A	#N/A	#N/A
YML082W	22.2946	0.927053	27.8653	0.867021	0.0600324	-0.0702328	#N/A	#N/A	#N/A
YIL118W	8.7977	-1.05859	7.38345	-1.3843	0.325705	-0.0703583	#N/A	#N/A	#N/A
YMR217W	17.6174	0.238953	21.3331	0.14901	0.0899422	-0.0704103	#N/A	#N/A	#N/A
YGR083C	24.3281	1.22623	29.3846	1.03402	0.192204	-0.0704901	#N/A	#N/A	#N/A
YOR125C	8.23652	-1.14116	4.94385	-1.65245	0.511298	-0.0705318	#N/A	#N/A	#N/A
YDR473C	12.4845	-0.516198	14.4795	-0.604323	0.0881244	-0.0706177	#N/A	#N/A	#N/A
YHL035C	11.0738	-0.723735	18.9122	-0.117087	-0.606648	-0.0708259	#N/A	#N/A	#N/A
YJR084W	7.43941	-1.25843	6.40485	-1.49186	0.233438	-0.0710375	#N/A	#N/A	#N/A
YDR280W	18.618	0.386161	18.06	-0.210756	0.596917	-0.0716009	#N/A	#N/A	#N/A
YKR099W	25.4164	1.38633	31.6946	1.28793	0.0984035	-0.0716333	#N/A	#N/A	#N/A
YGL225W	7.16612	-1.29863	17.1202	-0.314055	-0.984576	-0.0720123	#N/A	#N/A	#N/A
YPL129W	11.2815	-0.693178	14.2315	-0.631578	-0.0616003	-0.072093	#N/A	#N/A	#N/A
YLR018C	11.7031	-0.631153	11.7119	-0.908524	0.277372	-0.072173	#N/A	#N/A	#N/A
YMR308C	26.4083	1.53227	36.9389	1.86437	-0.332105	-0.0723481	#N/A	#N/A	#N/A
YOR106W	10.2349	-0.847149	11.849	-0.893455	0.0463065	-0.0723994	#N/A	#N/A	#N/A
YJR110W	16.8514	0.126255	19.2336	-0.0817618	0.208017	-0.0724555	#N/A	#N/A	#N/A
YIL068C	15.2506	-0.109243	22.4745	0.274477	-0.38372	-0.0726046	#N/A	#N/A	#N/A
YDR404C	11.9781	-0.590701	8.1619	-1.29873	0.708032	-0.0728129	#N/A	#N/A	#N/A
YKL195W	26.3679	1.52632	31.9327	1.31409	0.212232	-0.0728969	#N/A	#N/A	#N/A
YOL041C	23.5128	1.10627	21.4564	0.162563	0.94371	-0.0729443	#N/A	#N/A	#N/A
YER093C	20.1284	0.608362	23.774	0.417316	0.191045	-0.0729569	#N/A	#N/A	#N/A
YGR170W	23.712	1.13558	28.1738	0.900928	0.234651	-0.0730297	#N/A	#N/A	#N/A
YOR206W	23.7883	1.14681	31.5576	1.27287	-0.126063	-0.0731652	#N/A	#N/A	#N/A
YDL225W	21.719	0.84238	28.3915	0.924854	-0.082474	-0.0731772	#N/A	#N/A	#N/A
YMR203W	20.9107	0.723465	29.7287	1.07184	-0.348375	-0.0733145	#N/A	#N/A	#N/A
YCL052C	8.75017	-1.06559	15.6628	-0.474252	-0.591335	-0.0735613	#N/A	#N/A	#N/A
YDR035W	16.5736	0.0853956	22.001	0.222433	-0.137038	-0.0739118	#N/A	#N/A	#N/A
YJR088C	11.2825	-0.693041	15.9031	-0.447842	-0.245199	-0.0739227	#N/A	#N/A	#N/A
YDR514C	12.0334	-0.582562	15.7297	-0.466895	-0.115667	-0.0741564	#N/A	#N/A	#N/A
YCL043C	22.3758	0.939004	17.5823	-0.263262	1.20227	-0.0741789	#N/A	#N/A	#N/A
YGR123C	13.8444	-0.316129	12.6345	-0.807112	0.490983	-0.0742767	#N/A	#N/A	#N/A
YDL220C	8.87863	-1.04669	7.13051	-1.4121	0.365413	-0.0743752	#N/A	#N/A	#N/A
YGR094W	26.2517	1.50923	32.8709	1.41723	0.0920025	-0.0745648	#N/A	#N/A	#N/A
YHR132C	12.8691	-0.459618	24.5737	0.505212	-0.96483	-0.0746391	#N/A	#N/A	#N/A
YLR396C	21.9013	0.869201	27.046	0.776961	0.0922399	-0.0748561	#N/A	#N/A	#N/A
YER167W	26.5696	1.55599	34.3676	1.58174	-0.025741	-0.0748667	#N/A	#N/A	#N/A
YER025W	12.7394	-0.478689	15.6482	-0.475862	-0.00282706	-0.0753068	#N/A	#N/A	#N/A
YOR197W	15.0642	-0.136667	16.7437	-0.355445	0.218778	-0.0754339	#N/A	#N/A	#N/A
YJR067C	5.89179	-1.48611	14.406	-0.612399	-0.873711	-0.0754479	#N/A	#N/A	#N/A
YDL045C	4.93577	-1.62676	6.7971	-1.44875	-0.178009	-0.0756504	#N/A	#N/A	#N/A
YMR293C	4.88333	-1.63447	7.41485	-1.38085	-0.253625	-0.0759141	#N/A	#N/A	#N/A
YKR026C	10.5272	-0.804156	9.97718	-1.0992	0.295047	-0.0762957	#N/A	#N/A	#N/A
YKL165C	11.1597	-0.711102	19.9805	0.000336861	-0.711438	-0.0763936	#N/A	#N/A	#N/A
YCR009C	6.58063	-1.38477	17.4255	-0.280503	-1.10427	-0.076661	#N/A	#N/A	#N/A
YJL033W	20.083	0.601682	23.3667	0.372546	0.229136	-0.0767458	#N/A	#N/A	#N/A
YDL193W	8.10393	-1.16066	9.57667	-1.14322	-0.0174368	-0.0767837	#N/A	#N/A	#N/A
YOR370C	25.6862	1.42603	29.5694	1.05433	0.371691	-0.076905	#N/A	#N/A	#N/A
YLL018C	23.508	1.10557	28.5664	0.944078	0.161496	-0.0769234	#N/A	#N/A	#N/A
YDR195W	7.8586	-1.19676	10.1622	-1.07887	-0.11789	-0.0769426	#N/A	#N/A	#N/A
YOR099W	7.26581	-1.28397	6.38349	-1.49421	0.210246	-0.0769841	#N/A	#N/A	#N/A
YNL287W	27.1667	1.64384	33.3102	1.46551	0.178324	-0.077035	#N/A	#N/A	#N/A
YHR114W	18.1029	0.310375	22.4493	0.271702	0.0386731	-0.0771325	#N/A	#N/A	#N/A
YJL209W	18.9869	0.440429	20.6411	0.0729496	0.367479	-0.0772338	#N/A	#N/A	#N/A
YPL122C	9.53663	-0.949884	13.7835	-0.680815	-0.269069	-0.0772893	#N/A	#N/A	#N/A
YFL009W	18.1504	0.317369	29.2609	1.02042	-0.703051	-0.0774318	#N/A	#N/A	#N/A
YML074C	17.1269	0.166792	26.7901	0.74883	-0.582038	-0.0775735	#N/A	#N/A	#N/A
YCR057C	26.3537	1.52422	35.1586	1.66869	-0.144463	-0.0777092	#N/A	#N/A	#N/A
YGR157W	16.494	0.0736717	20.5965	0.0680506	0.00562112	-0.0779148	#N/A	#N/A	#N/A
YDR212W	23.5681	1.11441	34.0406	1.54579	-0.43138	-0.0779644	#N/A	#N/A	#N/A
YGR233C	14.9594	-0.152097	16.3256	-0.401404	0.249306	-0.0781867	#N/A	#N/A	#N/A
YOR260W	21.2983	0.780488	30.2862	1.13312	-0.35263	-0.0782191	#N/A	#N/A	#N/A
YPL193W	12.8521	-0.462117	15.9876	-0.438551	-0.0235664	-0.0784317	#N/A	#N/A	#N/A
YOR272W	11.6041	-0.645714	14.2517	-0.629356	-0.0163574	-0.0784544	#N/A	#N/A	#N/A
YDR005C	15.7268	-0.039193	19.3691	-0.0668635	0.0276705	-0.0787178	#N/A	#N/A	#N/A
YDR147W	17.0467	0.154993	21.48	0.165157	-0.0101635	-0.0791992	#N/A	#N/A	#N/A
YML026C	4.37364	-1.70946	3.99938	-1.75627	0.0468101	-0.0792805	#N/A	#N/A	#N/A
YHL017W	10.4787	-0.811285	15.9505	-0.44263	-0.368655	-0.0792823	#N/A	#N/A	#N/A
YLR328W	8.80307	-1.05781	13.083	-0.757814	-0.299991	-0.0794213	#N/A	#N/A	#N/A
YLR262C	14.9822	-0.148732	18.5544	-0.156409	0.00767705	-0.0797151	#N/A	#N/A	#N/A
YLR027C	6.69201	-1.36838	10.646	-1.02569	-0.342692	-0.0798935	#N/A	#N/A	#N/A
YDR375C	13.1326	-0.420851	15.098	-0.536334	0.115483	-0.0799219	#N/A	#N/A	#N/A
YLR115W	23.953	1.17104	32.7434	1.40321	-0.232166	-0.0803453	#N/A	#N/A	#N/A
YDR219C	29.0788	1.92514	22.2704	0.252044	1.6731	-0.0804925	#N/A	#N/A	#N/A
YLR060W	17.9575	0.288991	24.8011	0.530206	-0.241215	-0.0804959	#N/A	#N/A	#N/A
YLR196W	17.8565	0.274129	24.4198	0.488295	-0.214166	-0.0807911	#N/A	#N/A	#N/A
YDR161W	7.5206	-1.24648	7.9651	-1.32037	0.0738848	-0.0809534	#N/A	#N/A	#N/A
YJR045C	13.0695	-0.43013	19.9849	0.000820499	-0.43095	-0.0809609	#N/A	#N/A	#N/A
YPR019W	19.7688	0.555469	25.842	0.644626	-0.0891575	-0.0809611	#N/A	#N/A	#N/A
YJL047C	11.3395	-0.684642	15.5772	-0.483665	-0.200977	-0.081206	#N/A	#N/A	#N/A
YPR033C	19.4547	0.509261	25.4775	0.60456	-0.0952999	-0.0812542	#N/A	#N/A	#N/A
YBR274W	6.97478	-1.32678	12.5293	-0.818675	-0.508106	-0.0812883	#N/A	#N/A	#N/A
YHR086W	20.8498	0.714502	32.2164	1.34528	-0.630777	-0.0813072	#N/A	#N/A	#N/A
YPL204W	23.7945	1.14773	28.4838	0.935007	0.212722	-0.0813347	#N/A	#N/A	#N/A
YCR084C	26.045	1.47881	33.2762	1.46177	0.017043	-0.0813853	#N/A	#N/A	#N/A
YOR056C	16.6333	0.0941735	18.6138	-0.149881	0.244055	-0.0817046	#N/A	#N/A	#N/A
YDR014W	7.29382	-1.27985	4.4139	-1.71071	0.430861	-0.0820256	#N/A	#N/A	#N/A
YMR163C	10.7719	-0.768146	13.533	-0.70835	-0.059796	-0.0822376	#N/A	#N/A	#N/A
YML010W	27.4139	1.6802	33.6132	1.49881	0.181394	-0.0825168	#N/A	#N/A	#N/A
YOR061W	22.211	0.914762	30.1079	1.11352	-0.198762	-0.0825736	#N/A	#N/A	#N/A
YBL050W	18.2862	0.337339	19.4795	-0.0547259	0.392064	-0.0827123	#N/A	#N/A	#N/A
YJR051W	12.9678	-0.445087	23.2855	0.363616	-0.808703	-0.0827799	#N/A	#N/A	#N/A
YKL184W	20.1863	0.616887	22.2069	0.245055	0.371832	-0.0830551	#N/A	#N/A	#N/A
YKL009W	7.76924	-1.2099	10.0273	-1.09369	-0.116209	-0.0830705	#N/A	#N/A	#N/A
YBR007C	17.9047	0.281216	26.5717	0.724831	-0.443615	-0.0832297	#N/A	#N/A	#N/A
YKL172W	22.1487	0.905589	26.9845	0.770204	0.135386	-0.0832791	#N/A	#N/A	#N/A
YHR108W	18.7727	0.408925	30.7964	1.1892	-0.780275	-0.0832916	#N/A	#N/A	#N/A
YOL061W	18.9123	0.429451	25.5093	0.608049	-0.178597	-0.0833382	#N/A	#N/A	#N/A
YNL159C	9.18651	-1.00139	7.26531	-1.39728	0.395891	-0.0834264	#N/A	#N/A	#N/A
YPL168W	7.29017	-1.28038	8.01526	-1.31485	0.0344708	-0.0837459	#N/A	#N/A	#N/A
YML064C	6.054	-1.46225	4.91122	-1.65604	0.193796	-0.0838234	#N/A	#N/A	#N/A
YBR246W	10.2756	-0.84117	15.1796	-0.527363	-0.313807	-0.0841291	#N/A	#N/A	#N/A
YHR050W	6.11336	-1.45351	10.0667	-1.08936	-0.364156	-0.0841447	#N/A	#N/A	#N/A
YNL004W	11.0236	-0.731128	18.2632	-0.188417	-0.542712	-0.0841894	#N/A	#N/A	#N/A
YOR187W	16.8435	0.125092	24.5628	0.504017	-0.378925	-0.0842385	#N/A	#N/A	#N/A
YPR110C	18.1445	0.316496	23.1361	0.347196	-0.0306996	-0.0844157	#N/A	#N/A	#N/A
YLR454W	24.3808	1.23398	33.924	1.53297	-0.298994	-0.084486	#N/A	#N/A	#N/A
YKL081W	9.80385	-0.910572	5.64921	-1.57492	0.664351	-0.0845197	#N/A	#N/A	#N/A
YDR303C	24.6374	1.27173	34.0666	1.54865	-0.276917	-0.0847592	#N/A	#N/A	#N/A
YNL061W	22.0744	0.894669	33.096	1.44197	-0.547298	-0.0848281	#N/A	#N/A	#N/A
YHR088W	7.31896	-1.27615	9.2496	-1.17918	-0.0969689	-0.0848841	#N/A	#N/A	#N/A
YMR005W	11.7002	-0.631589	15.2428	-0.520419	-0.11117	-0.0849996	#N/A	#N/A	#N/A
YDR062W	17.8162	0.268198	26.186	0.682439	-0.414241	-0.0850356	#N/A	#N/A	#N/A
YGR145W	18.2713	0.335149	20.981	0.110313	0.224836	-0.0850773	#N/A	#N/A	#N/A
YIL014W	13.3411	-0.390174	15.6104	-0.480017	0.0898428	-0.0852492	#N/A	#N/A	#N/A
YDR458C	7.0504	-1.31566	19.8983	-0.00869288	-1.30696	-0.0857154	#N/A	#N/A	#N/A
YMR311C	13.5703	-0.356448	16.8358	-0.345322	-0.0111262	-0.0857878	#N/A	#N/A	#N/A
YIL137C	19.5616	0.524978	32.0093	1.32252	-0.797544	-0.0857882	#N/A	#N/A	#N/A
YDL088C	21.6609	0.833824	26.2041	0.684424	0.1494	-0.0858094	#N/A	#N/A	#N/A
YDR264C	23.3382	1.08059	30.9149	1.20223	-0.121636	-0.0859384	#N/A	#N/A	#N/A
YAL036C	7.79752	-1.20574	14.7498	-0.574608	-0.631132	-0.0860069	#N/A	#N/A	#N/A
YHR061C	4.69773	-1.66178	5.90879	-1.54639	-0.115389	-0.086106	#N/A	#N/A	#N/A
YML073C	7.15085	-1.30088	8.21419	-1.29299	-0.00789062	-0.0862255	#N/A	#N/A	#N/A
YKR078W	11.0451	-0.727965	12.0298	-0.873586	0.145621	-0.0863928	#N/A	#N/A	#N/A
YIL041W	12.0226	-0.584155	14.778	-0.571512	-0.0126433	-0.0863983	#N/A	#N/A	#N/A
YDL162C	23.3055	1.07579	33.8918	1.52944	-0.45365	-0.0868576	#N/A	#N/A	#N/A
YDR265W	4.3858	-1.70767	11.4355	-0.938911	-0.768758	-0.0870175	#N/A	#N/A	#N/A
YJR125C	17.5815	0.233673	24.8592	0.536599	-0.302926	-0.0871963	#N/A	#N/A	#N/A
YOL062C	13.8751	-0.311609	25.3484	0.59037	-0.901979	-0.0872057	#N/A	#N/A	#N/A
YMR126C	11.1923	-0.706308	11.6058	-0.920194	0.213886	-0.0874203	#N/A	#N/A	#N/A
YLR441C	16.383	0.0573525	5.89503	-1.5479	1.60526	-0.0877371	#N/A	#N/A	#N/A
YLR253W	16.6802	0.101076	19.7308	-0.0271096	0.128186	-0.0877734	#N/A	#N/A	#N/A
YKR087C	3.22791	-1.87802	7.79236	-1.33935	-0.538664	-0.0882722	#N/A	#N/A	#N/A
YML130C	15.1065	-0.130448	22.6939	0.298592	-0.429041	-0.0882931	#N/A	#N/A	#N/A
YGL019W	11.5661	-0.651315	14.2751	-0.626787	-0.0245276	-0.0886381	#N/A	#N/A	#N/A
YBR234C	17.1349	0.167962	20.8072	0.0912069	0.0767549	-0.0888736	#N/A	#N/A	#N/A
YNL182C	13.1913	-0.412211	16.7725	-0.352277	-0.0599337	-0.0888911	#N/A	#N/A	#N/A
YMR213W	18.6795	0.395207	21.7974	0.200055	0.195153	-0.0890803	#N/A	#N/A	#N/A
YDR028C	28.6271	1.85869	35.5698	1.71388	0.144806	-0.0890864	#N/A	#N/A	#N/A
YPR129W	15.4936	-0.0734931	15.4264	-0.500238	0.426745	-0.0891443	#N/A	#N/A	#N/A
YPL063W	14.6183	-0.202277	20.0916	0.0125482	-0.214825	-0.0892009	#N/A	#N/A	#N/A
YKL046C	12.9507	-0.447605	18.8773	-0.120926	-0.326679	-0.0894186	#N/A	#N/A	#N/A
YGR032W	17.8425	0.272064	22.148	0.238591	0.0334729	-0.0895897	#N/A	#N/A	#N/A
YGL099W	12.2486	-0.550901	20.0392	0.00679672	-0.557697	-0.0897876	#N/A	#N/A	#N/A
YNL215W	16.1803	0.0275226	20.0265	0.00539637	0.0221262	-0.0899048	#N/A	#N/A	#N/A
YDR122W	23.2481	1.06733	27.9573	0.877129	0.1902	-0.0899227	#N/A	#N/A	#N/A
YLR069C	19.6822	0.54273	22.7659	0.306507	0.236223	-0.0899532	#N/A	#N/A	#N/A
YNL271C	32.0425	2.36116	33.3973	1.47508	0.88608	-0.0900129	#N/A	#N/A	#N/A
YJL093C	15.1212	-0.12829	13.306	-0.733311	0.605021	-0.0900206	#N/A	#N/A	#N/A
YDR235W	8.83678	-1.05285	16.3263	-0.401325	-0.65152	-0.0901485	#N/A	#N/A	#N/A
YGL084C	15.8599	-0.0196144	22.0786	0.230957	-0.250572	-0.0906595	#N/A	#N/A	#N/A
YIL078W	30.53	2.13865	33.0256	1.43423	0.704421	-0.0909123	#N/A	#N/A	#N/A
YHR159W	5.26687	-1.57805	5.56909	-1.58373	0.00568057	-0.0911055	#N/A	#N/A	#N/A
YOR380W	5.40959	-1.55705	3.48272	-1.81306	0.256007	-0.0918158	#N/A	#N/A	#N/A
YKL005C	6.18399	-1.44312	11.0615	-0.980014	-0.463108	-0.0921244	#N/A	#N/A	#N/A
YPR181C	22.4236	0.946037	32.4553	1.37154	-0.425506	-0.0924253	#N/A	#N/A	#N/A
YHR205W	27.0433	1.62569	34.9685	1.64779	-0.0221028	-0.0925001	#N/A	#N/A	#N/A
YGR257C	15.2237	-0.113211	19.5088	-0.0515091	-0.0617017	-0.0925559	#N/A	#N/A	#N/A
YHR197W	16.2777	0.041855	24.5835	0.506286	-0.464431	-0.0927646	#N/A	#N/A	#N/A
YNL317W	14.3546	-0.241064	21.2882	0.14408	-0.385144	-0.0928322	#N/A	#N/A	#N/A
YPL249C	9.71925	-0.923018	11.5656	-0.924611	0.00159331	-0.0928885	#N/A	#N/A	#N/A
YML093W	23.7924	1.14741	33.2083	1.45431	-0.3069	-0.0931381	#N/A	#N/A	#N/A
YNL016W	26.4655	1.54068	29.9073	1.09147	0.449215	-0.0933878	#N/A	#N/A	#N/A
YGR128C	23.6034	1.11961	33.7608	1.51504	-0.395435	-0.0934483	#N/A	#N/A	#N/A
YDR130C	11.6361	-0.641005	11.5762	-0.923444	0.282439	-0.0936207	#N/A	#N/A	#N/A
YOR322C	25.3232	1.37262	34.6192	1.60939	-0.23677	-0.0936788	#N/A	#N/A	#N/A
YMR019W	23.1489	1.05275	22.5014	0.277435	0.77531	-0.094027	#N/A	#N/A	#N/A
YOR031W	24.0068	1.17895	30.9696	1.20823	-0.0292817	-0.0943341	#N/A	#N/A	#N/A
YPL179W	20.3628	0.642851	26.537	0.721016	-0.0781649	-0.0945144	#N/A	#N/A	#N/A
YDR301W	23.791	1.14721	30.0696	1.10931	0.0378991	-0.0945894	#N/A	#N/A	#N/A
YLR192C	8.60866	-1.08641	10.5076	-1.0409	-0.0455039	-0.095053	#N/A	#N/A	#N/A
YHR003C	11.6212	-0.643198	8.60105	-1.25046	0.607265	-0.0950753	#N/A	#N/A	#N/A
YPL217C	25.304	1.3698	34.1106	1.55348	-0.18368	-0.0951903	#N/A	#N/A	#N/A
YDR101C	21.2898	0.779239	27.5344	0.830652	-0.0514129	-0.0953703	#N/A	#N/A	#N/A
YOR154W	10.4357	-0.817617	13.2856	-0.735547	-0.0820706	-0.0954395	#N/A	#N/A	#N/A
YGL105W	18.942	0.43383	29.2566	1.01995	-0.586118	-0.0954835	#N/A	#N/A	#N/A
YER114C	31.4838	2.27896	34.2664	1.57062	0.708346	-0.0956994	#N/A	#N/A	#N/A
YPL228W	25.6086	1.41461	27.2264	0.796792	0.617813	-0.0959445	#N/A	#N/A	#N/A
YLR448W	9.40418	-0.969371	9.31808	-1.17165	0.202278	-0.096489	#N/A	#N/A	#N/A
YML114C	25.4931	1.39762	31.1258	1.2254	0.172218	-0.0965467	#N/A	#N/A	#N/A
YDL203C	13.0892	-0.427229	15.989	-0.438396	0.011167	-0.0973902	#N/A	#N/A	#N/A
YOR244W	19.5563	0.524202	24.2688	0.471694	0.0525078	-0.0974347	#N/A	#N/A	#N/A
YDR216W	24.7928	1.29459	27.3137	0.806383	0.488206	-0.0974925	#N/A	#N/A	#N/A
YPL042C	18.1915	0.323415	19.0827	-0.0983489	0.421763	-0.0975045	#N/A	#N/A	#N/A
YDL077C	12.5166	-0.511476	13.5411	-0.707465	0.195989	-0.0976985	#N/A	#N/A	#N/A
YMR193W	3.7679	-1.79857	5.90827	-1.54645	-0.252128	-0.0977463	#N/A	#N/A	#N/A
YIL005W	13.7532	-0.32955	16.2083	-0.414292	0.0847429	-0.0980064	#N/A	#N/A	#N/A
YJR056C	6.26987	-1.43049	6.89907	-1.43754	0.00705457	-0.0980162	#N/A	#N/A	#N/A
YDR524C	7.12752	-1.30431	3.96721	-1.7598	0.455494	-0.0982662	#N/A	#N/A	#N/A
YJL073W	6.30111	-1.42589	21.8346	0.204141	-1.63003	-0.0982758	#N/A	#N/A	#N/A
YIL145C	13.2223	-0.407649	17.6989	-0.250453	-0.157196	-0.0983449	#N/A	#N/A	#N/A
YLR028C	11.1982	-0.705439	18.4301	-0.170074	-0.535365	-0.0985624	#N/A	#N/A	#N/A
YMR124W	27.8642	1.74645	30.822	1.19201	0.554436	-0.0985796	#N/A	#N/A	#N/A
YLR382C	18.2456	0.331365	26.5326	0.720526	-0.389161	-0.0986964	#N/A	#N/A	#N/A
YHR179W	8.14919	-1.154	5.8656	-1.55114	0.397135	-0.0987903	#N/A	#N/A	#N/A
YGR143W	13.5031	-0.366344	16.3868	-0.394673	0.0283287	-0.0989583	#N/A	#N/A	#N/A
YPL235W	29.0502	1.92093	31.7129	1.28993	0.630996	-0.0990982	#N/A	#N/A	#N/A
YER006W	14.5863	-0.206985	15.1269	-0.53316	0.326175	-0.0993203	#N/A	#N/A	#N/A
YJR143C	17.3461	0.199042	19.6576	-0.0351561	0.234198	-0.0996108	#N/A	#N/A	#N/A
YBL039C	19.3926	0.500116	26.9637	0.767916	-0.2678	-0.099729	#N/A	#N/A	#N/A
YIL156W	11.4441	-0.669256	13.0613	-0.760201	0.0909448	-0.0998359	#N/A	#N/A	#N/A
YBL045C	16.548	0.081622	16.5399	-0.377844	0.459466	-0.100102	#N/A	#N/A	#N/A
YLR131C	16.2903	0.0437057	26.2755	0.692273	-0.648567	-0.100324	#N/A	#N/A	#N/A
YGL017W	6.5108	-1.39504	8.22551	-1.29174	-0.103299	-0.100397	#N/A	#N/A	#N/A
YLR320W	22.8357	1.00666	26.0195	0.664131	0.342526	-0.100496	#N/A	#N/A	#N/A
YGL246C	19.6347	0.535734	21.7925	0.199515	0.336219	-0.10057	#N/A	#N/A	#N/A
YLR353W	17.0573	0.156557	19.8967	-0.00887699	0.165434	-0.1007	#N/A	#N/A	#N/A
YDR337W	7.37747	-1.26754	10.6295	-1.0275	-0.240036	-0.101528	#N/A	#N/A	#N/A
YKL117W	8.18168	-1.14922	12.8007	-0.788846	-0.360378	-0.101541	#N/A	#N/A	#N/A
YBR048W	9.84796	-0.904081	11.0626	-0.979899	0.0758173	-0.101998	#N/A	#N/A	#N/A
YBR263W	8.40231	-1.11676	11.655	-0.91478	-0.201985	-0.102038	#N/A	#N/A	#N/A
YHR052W	19.7689	0.555482	25.1195	0.565209	-0.00972637	-0.102267	#N/A	#N/A	#N/A
YDR405W	10.8123	-0.762212	12.428	-0.829814	0.0676023	-0.102636	#N/A	#N/A	#N/A
YLR387C	15.4827	-0.0751099	14.7199	-0.577896	0.502786	-0.103005	#N/A	#N/A	#N/A
YLR238W	17.1386	0.168515	19.135	-0.0925931	0.261108	-0.103238	#N/A	#N/A	#N/A
YOR204W	18.4698	0.364361	25.0309	0.555468	-0.191107	-0.103289	#N/A	#N/A	#N/A
YLR312W-A	6.885	-1.33999	10.6627	-1.02385	-0.316136	-0.103423	#N/A	#N/A	#N/A
YHR155W	21.154	0.759247	31.5458	1.27157	-0.512323	-0.103798	#N/A	#N/A	#N/A
YJR002W	13.8194	-0.31981	13.5912	-0.701953	0.382143	-0.103851	#N/A	#N/A	#N/A
YIL031W	29.9569	2.05433	31.8797	1.30827	0.746063	-0.103981	#N/A	#N/A	#N/A
YBR154C	7.90935	-1.18929	6.88533	-1.43905	0.249763	-0.103996	#N/A	#N/A	#N/A
YDL195W	29.9902	2.05923	39.819	2.18094	-0.121709	-0.104232	#N/A	#N/A	#N/A
YGL078C	15.5062	-0.0716534	22.5204	0.279521	-0.351174	-0.104631	#N/A	#N/A	#N/A
YNL229C	19.0155	0.444636	21.697	0.189017	0.255619	-0.104635	#N/A	#N/A	#N/A
YKL004W	16.1182	0.0183931	17.4004	-0.283262	0.301655	-0.104877	#N/A	#N/A	#N/A
YMR029C	11.0207	-0.731553	13.7492	-0.684589	-0.0469645	-0.105	#N/A	#N/A	#N/A
YMR302C	26.3224	1.51962	30.1985	1.12347	0.396149	-0.105091	#N/A	#N/A	#N/A
YMR110C	5.81521	-1.49738	12.817	-0.78706	-0.710317	-0.105118	#N/A	#N/A	#N/A
YML068W	19.895	0.574036	22.1179	0.235273	0.338764	-0.105334	#N/A	#N/A	#N/A
YDR505C	26.0325	1.47698	32.6803	1.39627	0.0807067	-0.10543	#N/A	#N/A	#N/A
YMR177W	8.36386	-1.12242	9.09075	-1.19664	0.0742156	-0.105646	#N/A	#N/A	#N/A
YML086C	12.8196	-0.466895	18.4182	-0.171384	-0.295511	-0.105725	#N/A	#N/A	#N/A
YOL077C	13.4339	-0.376515	15.8921	-0.449044	0.0725284	-0.106003	#N/A	#N/A	#N/A
YMR197C	6.64557	-1.37521	8.45842	-1.26614	-0.109073	-0.106025	#N/A	#N/A	#N/A
YNL252C	15.1355	-0.12619	17.7613	-0.243593	0.117403	-0.106162	#N/A	#N/A	#N/A
YDR175C	10.5323	-0.803406	16.6904	-0.361295	-0.442111	-0.1062	#N/A	#N/A	#N/A
YER165W	23.5577	1.11288	27.8923	0.869991	0.242888	-0.1062	#N/A	#N/A	#N/A
YKL213C	19.476	0.512394	27.5829	0.835976	-0.323582	-0.106706	#N/A	#N/A	#N/A
YOR162C	8.7293	-1.06866	12.1851	-0.856511	-0.212147	-0.106742	#N/A	#N/A	#N/A
YPR095C	19.4848	0.513688	25.7158	0.630748	-0.11706	-0.107023	#N/A	#N/A	#N/A
YPR029C	24.5664	1.26128	31.9983	1.3213	-0.0600225	-0.107024	#N/A	#N/A	#N/A
YPR024W	26.3129	1.51822	32.2747	1.35169	0.166532	-0.107193	#N/A	#N/A	#N/A
YBR215W	20.3695	0.643844	26.2284	0.687093	-0.0432483	-0.107525	#N/A	#N/A	#N/A
YDR023W	21.1834	0.763572	25.7617	0.635795	0.127777	-0.107547	#N/A	#N/A	#N/A
YHR090C	21.3154	0.783004	26.1478	0.678239	0.104766	-0.107621	#N/A	#N/A	#N/A
YAL002W	13.3861	-0.383554	20.0691	0.01008	-0.393634	-0.107639	#N/A	#N/A	#N/A
YJR015W	5.65357	-1.52116	9.8001	-1.11867	-0.402491	-0.10775	#N/A	#N/A	#N/A
YNR031C	30.948	2.20015	35.5914	1.71625	0.48389	-0.107942	#N/A	#N/A	#N/A
YHR025W	6.52144	-1.39348	6.99082	-1.42746	0.0339798	-0.108044	#N/A	#N/A	#N/A
YNL177C	9.87951	-0.899439	9.96807	-1.1002	0.200765	-0.108094	#N/A	#N/A	#N/A
YOR310C	26.6003	1.5605	31.2785	1.24219	0.31832	-0.108174	#N/A	#N/A	#N/A
YHR206W	27.1338	1.639	35.9805	1.75903	-0.12003	-0.108832	#N/A	#N/A	#N/A
YNL094W	19.9179	0.577392	23.4479	0.381464	0.195928	-0.108833	#N/A	#N/A	#N/A
YER050C	9.09758	-1.01448	7.36304	-1.38654	0.372066	-0.108842	#N/A	#N/A	#N/A
YKR017C	9.18169	-1.0021	14.0495	-0.651579	-0.350524	-0.109139	#N/A	#N/A	#N/A
YNL026W	7.47425	-1.2533	20.5332	0.0610939	-1.31439	-0.109187	#N/A	#N/A	#N/A
YDR152W	17.1966	0.177039	16.2747	-0.406999	0.584038	-0.109522	#N/A	#N/A	#N/A
YFL004W	25.4805	1.39577	25.2281	0.577147	0.81862	-0.109909	#N/A	#N/A	#N/A
YLR052W	12.6815	-0.487215	9.58496	-1.14231	0.6551	-0.109977	#N/A	#N/A	#N/A
YHR064C	26.6538	1.56838	29.8089	1.08066	0.487726	-0.110123	#N/A	#N/A	#N/A
YLR449W	14.8646	-0.166035	18.7018	-0.140208	-0.0258277	-0.110149	#N/A	#N/A	#N/A
YDL170W	15.1116	-0.129707	18.2957	-0.184852	0.0551454	-0.110164	#N/A	#N/A	#N/A
YHL023C	9.63279	-0.935737	20.6504	0.0739784	-1.00972	-0.110424	#N/A	#N/A	#N/A
YMR183C	13.0012	-0.440184	11.9551	-0.881798	0.441614	-0.110424	#N/A	#N/A	#N/A
YDR087C	13.1357	-0.420396	7.68289	-1.35139	0.93099	-0.110601	#N/A	#N/A	#N/A
YBL032W	18.3079	0.340531	22.6544	0.294254	0.0462771	-0.110763	#N/A	#N/A	#N/A
YGR013W	10.318	-0.834928	14.0498	-0.651554	-0.183374	-0.110924	#N/A	#N/A	#N/A
YPL120W	12.2733	-0.547271	15.8049	-0.458635	-0.0886363	-0.11095	#N/A	#N/A	#N/A
YDR321W	6.52564	-1.39286	9.36525	-1.16646	-0.226395	-0.111344	#N/A	#N/A	#N/A
YNR023W	19.4953	0.515231	28.0159	0.883571	-0.36834	-0.111379	#N/A	#N/A	#N/A
YHL003C	14.0042	-0.292615	13.9928	-0.65782	0.365206	-0.111445	#N/A	#N/A	#N/A
YDL235C	7.95885	-1.18201	9.18567	-1.1862	0.00419697	-0.111495	#N/A	#N/A	#N/A
YGL134W	8.68238	-1.07556	6.52433	-1.47873	0.40317	-0.111563	#N/A	#N/A	#N/A
YJL054W	16.4063	0.0607737	15.2905	-0.515175	0.575949	-0.11163	#N/A	#N/A	#N/A
YNL096C	12.9403	-0.449138	7.32221	-1.39103	0.941893	-0.111882	#N/A	#N/A	#N/A
YPL020C	12.1541	-0.564807	16.8445	-0.344368	-0.220439	-0.112036	#N/A	#N/A	#N/A
YDR027C	30.0669	2.07051	30.8677	1.19703	0.873473	-0.112106	#N/A	#N/A	#N/A
YDR244W	21.2017	0.766274	24.4147	0.487731	0.278543	-0.112414	#N/A	#N/A	#N/A
YJR076C	20.2129	0.620796	25.3769	0.593495	0.0273015	-0.112418	#N/A	#N/A	#N/A
YPR165W	5.32369	-1.56969	9.21511	-1.18297	-0.386722	-0.112753	#N/A	#N/A	#N/A
YPR163C	25.4432	1.39028	29.3595	1.03126	0.359016	-0.11277	#N/A	#N/A	#N/A
YGR214W	10.8608	-0.755066	10.5809	-1.03284	0.277776	-0.113024	#N/A	#N/A	#N/A
YKL124W	8.19964	-1.14658	13.1672	-0.748567	-0.398014	-0.113195	#N/A	#N/A	#N/A
YMR190C	29.5122	1.9889	37.3971	1.91473	0.0741719	-0.113226	#N/A	#N/A	#N/A
YJL044C	9.22398	-0.995881	8.00056	-1.31647	0.320586	-0.113571	#N/A	#N/A	#N/A
YBL063W	20.4458	0.655064	25.3766	0.593467	0.0615967	-0.114767	#N/A	#N/A	#N/A
YGL062W	12.6999	-0.484509	9.64014	-1.13625	0.65174	-0.115476	#N/A	#N/A	#N/A
YDR429C	16.8449	0.125295	19.9554	-0.00242207	0.127717	-0.115624	#N/A	#N/A	#N/A
YPL266W	12.2869	-0.545266	14.7481	-0.574791	0.0295251	-0.115627	#N/A	#N/A	#N/A
YGL257C	15.5648	-0.0630292	14.8454	-0.5641	0.501071	-0.116021	#N/A	#N/A	#N/A
YLR116W	22.3823	0.939956	28.4184	0.927815	0.0121403	-0.117111	#N/A	#N/A	#N/A
YGL195W	28.3203	1.81356	39.7887	2.17762	-0.364058	-0.117298	#N/A	#N/A	#N/A
YNL176C	21.5899	0.823387	30.7495	1.18404	-0.360653	-0.117568	#N/A	#N/A	#N/A
YBR029C	19.6361	0.535946	18.2667	-0.188032	0.723978	-0.11772	#N/A	#N/A	#N/A
YML076C	7.5258	-1.24572	17.4587	-0.276852	-0.968864	-0.117914	#N/A	#N/A	#N/A
YIL109C	29.0187	1.91629	36.3557	1.80026	0.116036	-0.118046	#N/A	#N/A	#N/A
YBR059C	30.6262	2.15279	37.5962	1.93662	0.216167	-0.118054	#N/A	#N/A	#N/A
YDR143C	17.5548	0.229742	27.1212	0.785223	-0.555481	-0.118516	#N/A	#N/A	#N/A
YLR087C	4.15437	-1.74172	11.5048	-0.931293	-0.810426	-0.118864	#N/A	#N/A	#N/A
YNR013C	19.0143	0.444456	23.9394	0.435492	0.00896384	-0.119114	#N/A	#N/A	#N/A
YGL172W	22.5614	0.966308	29.7606	1.07535	-0.109039	-0.119184	#N/A	#N/A	#N/A
YBR079C	26.4844	1.54346	34.1278	1.55538	-0.0119241	-0.11943	#N/A	#N/A	#N/A
YNL308C	24.4874	1.24966	27.3075	0.805702	0.44396	-0.119614	#N/A	#N/A	#N/A
YGR099W	20.9553	0.730021	12.1867	-0.856337	1.58636	-0.119767	#N/A	#N/A	#N/A
YHR079C	12.9018	-0.454809	20.0758	0.0108115	-0.46562	-0.120186	#N/A	#N/A	#N/A
YGR195W	6.6288	-1.37768	12.4371	-0.828815	-0.548866	-0.120222	#N/A	#N/A	#N/A
YNL005C	14.5713	-0.209191	21.2556	0.140492	-0.349684	-0.120297	#N/A	#N/A	#N/A
YGR009C	26.961	1.61358	37.0718	1.87897	-0.265396	-0.120529	#N/A	#N/A	#N/A
YAL021C	25.6289	1.4176	36.7559	1.84425	-0.426647	-0.120717	#N/A	#N/A	#N/A
YOR073W	25.2443	1.36102	33.314	1.46593	-0.104912	-0.120868	#N/A	#N/A	#N/A
YCR027C	9.27984	-0.987663	5.93055	-1.544	0.556336	-0.12109	#N/A	#N/A	#N/A
YDR054C	16.7428	0.110287	18.6172	-0.149511	0.259798	-0.121627	#N/A	#N/A	#N/A
YPL005W	8.09126	-1.16253	8.15775	-1.29919	0.136664	-0.121628	#N/A	#N/A	#N/A
YDL001W	6.61611	-1.37955	7.02733	-1.42344	0.0438943	-0.121724	#N/A	#N/A	#N/A
YOR209C	18.0365	0.300612	26.7102	0.740057	-0.439445	-0.12194	#N/A	#N/A	#N/A
YMR209C	12.1309	-0.568222	12.7995	-0.788985	0.220762	-0.122144	#N/A	#N/A	#N/A
YOL097C	14.3224	-0.245812	25.865	0.647148	-0.89296	-0.122476	#N/A	#N/A	#N/A
YDL217C	6.38058	-1.4142	10.8183	-1.00675	-0.407445	-0.122525	#N/A	#N/A	#N/A
YNL025C	14.2368	-0.258402	16.0822	-0.428147	0.169745	-0.122535	#N/A	#N/A	#N/A
YOR090C	15.9677	-0.00374389	12.8722	-0.780992	0.777248	-0.122612	#N/A	#N/A	#N/A
YER060W-A	5.04076	-1.61131	9.37225	-1.16569	-0.445618	-0.122659	#N/A	#N/A	#N/A
YJR132W	21.4541	0.803397	24.6029	0.508428	0.294969	-0.122773	#N/A	#N/A	#N/A
YBL004W	21.9093	0.87038	32.6595	1.39398	-0.523603	-0.122807	#N/A	#N/A	#N/A
YKR036C	14.6072	-0.203912	20.4375	0.0505764	-0.254488	-0.123208	#N/A	#N/A	#N/A
YOR156C	15.3605	-0.0930864	22.7605	0.305907	-0.398993	-0.123283	#N/A	#N/A	#N/A
YGL090W	10.2436	-0.845874	15.5866	-0.482628	-0.363245	-0.123418	#N/A	#N/A	#N/A
YLR439W	11.0683	-0.724542	15.0751	-0.53885	-0.185692	-0.123462	#N/A	#N/A	#N/A
YNL002C	4.47002	-1.69528	8.63903	-1.24629	-0.448989	-0.123587	#N/A	#N/A	#N/A
YFL050C	13.9915	-0.294484	17.5049	-0.271777	-0.0227067	-0.123614	#N/A	#N/A	#N/A
YEL055C	21.0201	0.739559	29.9163	1.09246	-0.352899	-0.123628	#N/A	#N/A	#N/A
YDR320C	13.3773	-0.384846	21.7024	0.189608	-0.574454	-0.124187	#N/A	#N/A	#N/A
YKL173W	19.5809	0.527815	24.8547	0.536103	-0.00828813	-0.125089	#N/A	#N/A	#N/A
YHR188C	11.1264	-0.716005	13.5191	-0.709884	-0.00612083	-0.125236	#N/A	#N/A	#N/A
YMR016C	14.5904	-0.206371	23.8396	0.424525	-0.630896	-0.125249	#N/A	#N/A	#N/A
YCL037C	21.5851	0.82268	26.1925	0.683148	0.139532	-0.125257	#N/A	#N/A	#N/A
YFL036W	25.9606	1.46639	36.6343	1.83089	-0.364495	-0.125376	#N/A	#N/A	#N/A
YER133W	24.4328	1.24163	24.6148	0.509727	0.731908	-0.125613	#N/A	#N/A	#N/A
YGL149W	25.9014	1.45769	35.1964	1.67284	-0.21515	-0.126106	#N/A	#N/A	#N/A
YMR216C	25.8579	1.45129	32.1033	1.33284	0.118444	-0.126143	#N/A	#N/A	#N/A
YKL204W	23.2569	1.06863	27.321	0.807192	0.261438	-0.126163	#N/A	#N/A	#N/A
YML035C	13.1541	-0.417683	17.1914	-0.30623	-0.111454	-0.126173	#N/A	#N/A	#N/A
YLR410W	20.5126	0.664884	30.9815	1.20954	-0.544658	-0.126785	#N/A	#N/A	#N/A
YGR200C	21.6428	0.831165	26.6658	0.735171	0.0959939	-0.127039	#N/A	#N/A	#N/A
YDL082W	6.90681	-1.33678	5.98051	-1.53851	0.201726	-0.127209	#N/A	#N/A	#N/A
YDL205C	17.7193	0.253948	20.4067	0.0471887	0.206759	-0.127235	#N/A	#N/A	#N/A
YCL011C	18.2872	0.337497	21.6514	0.184004	0.153493	-0.12739	#N/A	#N/A	#N/A
YMR013C	9.91625	-0.894034	14.1676	-0.6386	-0.255434	-0.127456	#N/A	#N/A	#N/A
YOR038C	16.2114	0.0321017	25.2329	0.57767	-0.545569	-0.127579	#N/A	#N/A	#N/A
YLR139C	12.4696	-0.518382	20.9454	0.106401	-0.624784	-0.127608	#N/A	#N/A	#N/A
YDR093W	22.838	1.007	32.0362	1.32548	-0.318473	-0.127795	#N/A	#N/A	#N/A
YFL041W	8.30418	-1.1312	11.3033	-0.953434	-0.177767	-0.127959	#N/A	#N/A	#N/A
YBL007C	23.6711	1.12956	38.6551	2.05301	-0.923445	-0.128562	#N/A	#N/A	#N/A
YNL275W	11.5996	-0.646385	14.0869	-0.647469	0.00108378	-0.128568	#N/A	#N/A	#N/A
YCR024C	4.08904	-1.75133	6.71077	-1.45824	-0.293089	-0.128713	#N/A	#N/A	#N/A
YPL007C	12.1878	-0.559854	14.8827	-0.559998	0.000144732	-0.12884	#N/A	#N/A	#N/A
YKL191W	10.2601	-0.843446	10.5099	-1.04065	0.197206	-0.129041	#N/A	#N/A	#N/A
YBR283C	20.3034	0.634113	30.7339	1.18233	-0.548219	-0.129384	#N/A	#N/A	#N/A
YMR165C	19.9791	0.586405	22.4588	0.272746	0.313658	-0.129755	#N/A	#N/A	#N/A
YML038C	16.1894	0.0288724	29.6568	1.06394	-1.03507	-0.12986	#N/A	#N/A	#N/A
YMR037C	25.6028	1.41376	33.5075	1.4872	-0.073437	-0.12989	#N/A	#N/A	#N/A
YJL128C	21.7093	0.840946	27.6922	0.84799	-0.00704385	-0.130218	#N/A	#N/A	#N/A
YGR261C	18.1613	0.318976	28.1963	0.903396	-0.584421	-0.130497	#N/A	#N/A	#N/A
YLR330W	20.0705	0.599848	33.1108	1.44359	-0.84374	-0.130527	#N/A	#N/A	#N/A
YNL047C	8.43775	-1.11155	19.4766	-0.0550468	-1.0565	-0.130845	#N/A	#N/A	#N/A
YKR051W	9.01786	-1.02621	11.0292	-0.983567	-0.0426386	-0.131071	#N/A	#N/A	#N/A
YDR170C	28.9014	1.89904	40.0689	2.20841	-0.309378	-0.131171	#N/A	#N/A	#N/A
YBL030C	12.3315	-0.538701	17.6531	-0.255478	-0.283223	-0.131812	#N/A	#N/A	#N/A
YPL097W	8.72931	-1.06866	9.79679	-1.11903	0.0503748	-0.131895	#N/A	#N/A	#N/A
YOL078W	19.0115	0.444049	25.1281	0.566148	-0.122099	-0.131997	#N/A	#N/A	#N/A
YDR123C	14.7038	-0.189701	14.8853	-0.559716	0.370015	-0.132172	#N/A	#N/A	#N/A
YGL075C	5.59809	-1.52932	5.56764	-1.58389	0.0545706	-0.132326	#N/A	#N/A	#N/A
YDL043C	10.9223	-0.746026	4.69027	-1.68033	0.934301	-0.132628	#N/A	#N/A	#N/A
YOR081C	20.1186	0.606921	27.4137	0.81738	-0.210459	-0.132639	#N/A	#N/A	#N/A
YLR381W	10.0972	-0.86741	11.9208	-0.885561	0.0181509	-0.132681	#N/A	#N/A	#N/A
YOR243C	18.9024	0.428004	26.7571	0.74521	-0.317206	-0.132968	#N/A	#N/A	#N/A
YER099C	8.71771	-1.07036	10.3079	-1.06285	-0.00751258	-0.133172	#N/A	#N/A	#N/A
YDL029W	20.2336	0.623841	28.0254	0.884618	-0.260776	-0.133259	#N/A	#N/A	#N/A
YMR064W	15.3358	-0.0967107	23.6275	0.401214	-0.497925	-0.133499	#N/A	#N/A	#N/A
YLR009W	10.7454	-0.772049	10.8835	-0.999583	0.227534	-0.133654	#N/A	#N/A	#N/A
YGL181W	17.7903	0.264388	18.3977	-0.17364	0.438028	-0.13405	#N/A	#N/A	#N/A
YIL126W	31.5049	2.28207	40.9627	2.30666	-0.0245848	-0.13409	#N/A	#N/A	#N/A
YPR008W	21.1969	0.765572	29.6994	1.06862	-0.30305	-0.135067	#N/A	#N/A	#N/A
YJL129C	23.0798	1.04258	37.1309	1.88547	-0.842888	-0.135091	#N/A	#N/A	#N/A
YBR121C	21.2611	0.775016	26.1915	0.683044	0.091972	-0.135105	#N/A	#N/A	#N/A
YPL032C	24.4591	1.24549	30.4928	1.15583	0.0896621	-0.135154	#N/A	#N/A	#N/A
YDL134C	14.087	-0.280435	19.5306	-0.0491168	-0.231318	-0.135587	#N/A	#N/A	#N/A
YKR008W	20.3054	0.634409	34.394	1.58464	-0.95023	-0.136033	#N/A	#N/A	#N/A
YKL092C	20.8089	0.708484	26.9323	0.764462	-0.0559774	-0.136109	#N/A	#N/A	#N/A
YIR007W	8.1206	-1.15821	11.4648	-0.935683	-0.222527	-0.136198	#N/A	#N/A	#N/A
YCL031C	21.832	0.859007	20.3152	0.0371263	0.821881	-0.136289	#N/A	#N/A	#N/A
YDR292C	19.3567	0.494836	29.6663	1.06498	-0.570145	-0.136367	#N/A	#N/A	#N/A
YPR114W	7.64177	-1.22865	8.93295	-1.21398	-0.0146713	-0.136596	#N/A	#N/A	#N/A
YPL115C	23.2255	1.06401	35.0914	1.66129	-0.59728	-0.137072	#N/A	#N/A	#N/A
YKL129C	16.4521	0.0675133	24.3684	0.48265	-0.415137	-0.137224	#N/A	#N/A	#N/A
YFL034C-B	9.06725	-1.01894	17.0919	-0.317172	-0.701766	-0.137553	#N/A	#N/A	#N/A
YOL124C	10.4558	-0.814659	8.43981	-1.26819	0.453528	-0.137822	#N/A	#N/A	#N/A
YDR483W	13.6279	-0.347982	20.585	0.0667887	-0.414771	-0.137841	#N/A	#N/A	#N/A
YGR077C	15.3993	-0.0873679	17.1255	-0.313481	0.226113	-0.138425	#N/A	#N/A	#N/A
YJR101W	5.77123	-1.50385	7.26047	-1.39782	-0.10603	-0.138491	#N/A	#N/A	#N/A
YKR096W	28.2155	1.79813	32.2529	1.3493	0.448834	-0.138781	#N/A	#N/A	#N/A
YGR185C	26.4502	1.53842	29.1298	1.00601	0.532414	-0.138828	#N/A	#N/A	#N/A
YDR475C	10.8783	-0.752501	15.9195	-0.446037	-0.306464	-0.138974	#N/A	#N/A	#N/A
YER140W	10.5165	-0.805723	10.2847	-1.0654	0.259674	-0.139467	#N/A	#N/A	#N/A
YDL005C	14.3436	-0.242688	22.3803	0.264126	-0.506814	-0.139536	#N/A	#N/A	#N/A
YBR165W	14.0494	-0.285967	12.4527	-0.827099	0.541132	-0.139616	#N/A	#N/A	#N/A
YJR007W	15.0547	-0.138075	19.837	-0.015438	-0.122637	-0.139667	#N/A	#N/A	#N/A
YLL013C	27.057	1.6277	32.57	1.38415	0.243555	-0.139862	#N/A	#N/A	#N/A
YDR422C	26.4994	1.54567	33.9381	1.53453	0.0111394	-0.140086	#N/A	#N/A	#N/A
YIR006C	26.6875	1.57333	34.6181	1.60927	-0.0359434	-0.140186	#N/A	#N/A	#N/A
YPL219W	5.65925	-1.52032	5.69004	-1.57043	0.0501147	-0.14031	#N/A	#N/A	#N/A
YER169W	4.97479	-1.62102	7.94116	-1.323	-0.298022	-0.140707	#N/A	#N/A	#N/A
YPL202C	16.0153	0.00325751	22.6481	0.293557	-0.290299	-0.140915	#N/A	#N/A	#N/A
YGL141W	20.2431	0.625247	25.5327	0.610625	0.0146225	-0.141422	#N/A	#N/A	#N/A
YML032C	19.5932	0.529636	27.2703	0.801615	-0.271979	-0.141639	#N/A	#N/A	#N/A
YDR421W	26.914	1.60666	19.1094	-0.0954053	1.70207	-0.141821	#N/A	#N/A	#N/A
YLR025W	15.8025	-0.0280509	19.9295	-0.0052629	-0.022788	-0.142432	#N/A	#N/A	#N/A
YOR147W	23.6235	1.12257	27.9383	0.875045	0.247525	-0.142488	#N/A	#N/A	#N/A
YIL127C	12.4181	-0.525968	8.98025	-1.20878	0.682815	-0.142792	#N/A	#N/A	#N/A
YBR202W	6.97728	-1.32641	9.87575	-1.11035	-0.216062	-0.142794	#N/A	#N/A	#N/A
YNL087W	22.09	0.89695	22.2218	0.2467	0.650249	-0.143137	#N/A	#N/A	#N/A
YPL231W	14.5185	-0.216949	21.8261	0.203206	-0.420155	-0.143199	#N/A	#N/A	#N/A
YGR141W	8.68595	-1.07503	6.62121	-1.46808	0.393048	-0.143523	#N/A	#N/A	#N/A
YKL064W	15.6111	-0.0562081	14.8973	-0.558399	0.502191	-0.143688	#N/A	#N/A	#N/A
YFL016C	15.4425	-0.081016	11.205	-0.964246	0.88323	-0.14379	#N/A	#N/A	#N/A
YHR009C	23.5206	1.10742	28.1741	0.900966	0.206454	-0.144114	#N/A	#N/A	#N/A
YDR326C	28.9545	1.90685	34.5104	1.59743	0.309418	-0.144745	#N/A	#N/A	#N/A
YIL077C	4.97912	-1.62038	4.64472	-1.68533	0.0649529	-0.144892	#N/A	#N/A	#N/A
YOR372C	27.7208	1.72535	37.1405	1.88652	-0.161174	-0.145044	#N/A	#N/A	#N/A
YBR011C	10.6944	-0.779558	17.1718	-0.308391	-0.471168	-0.145306	#N/A	#N/A	#N/A
YOR256C	19.8098	0.561491	23.4552	0.382267	0.179223	-0.145649	#N/A	#N/A	#N/A
YMR066W	13.8512	-0.315122	17.5545	-0.266319	-0.0488038	-0.145659	#N/A	#N/A	#N/A
YMR288W	17.1114	0.164507	17.1815	-0.307317	0.471825	-0.145851	#N/A	#N/A	#N/A
YGR167W	15.0402	-0.140204	16.7855	-0.350844	0.21064	-0.146227	#N/A	#N/A	#N/A
YMR109W	29.6836	2.01412	30.101	1.11276	0.901351	-0.14651	#N/A	#N/A	#N/A
YDL014W	13.4834	-0.369239	15.5404	-0.487708	0.118468	-0.146753	#N/A	#N/A	#N/A
YML106W	16.151	0.0232105	20.1456	0.0184909	0.00471968	-0.146824	#N/A	#N/A	#N/A
YER036C	15.4612	-0.0782619	13.2878	-0.73531	0.657048	-0.147202	#N/A	#N/A	#N/A
YER161C	21.8719	0.864865	29.5252	1.04947	-0.184609	-0.147803	#N/A	#N/A	#N/A
YLR220W	6.27357	-1.42994	12.7797	-0.791155	-0.638788	-0.148008	#N/A	#N/A	#N/A
YOR360C	18.5812	0.38074	29.3299	1.02801	-0.647266	-0.148405	#N/A	#N/A	#N/A
YNL257C	18.7535	0.406097	26.8107	0.751097	-0.345	-0.149259	#N/A	#N/A	#N/A
YDR266C	24.235	1.21253	30.2024	1.12391	0.0886211	-0.150057	#N/A	#N/A	#N/A
YGL233W	5.32307	-1.56978	9.04264	-1.20193	-0.367854	-0.150148	#N/A	#N/A	#N/A
YJL156C	13.9876	-0.295055	21.0968	0.123046	-0.4181	-0.150318	#N/A	#N/A	#N/A
YER040W	24.2574	1.21582	32.0091	1.3225	-0.106675	-0.150512	#N/A	#N/A	#N/A
YBR225W	5.40731	-1.55739	6.68945	-1.46058	-0.0968028	-0.15066	#N/A	#N/A	#N/A
YOR027W	14.1084	-0.277288	15.8091	-0.458174	0.180886	-0.15089	#N/A	#N/A	#N/A
YDL197C	10.373	-0.82684	26.3185	0.696995	-1.52384	-0.15111	#N/A	#N/A	#N/A
YBR098W	10.183	-0.854794	11.6937	-0.910521	0.0557278	-0.151251	#N/A	#N/A	#N/A
YDR338C	8.25436	-1.13853	15.2135	-0.523641	-0.614889	-0.151423	#N/A	#N/A	#N/A
YJR117W	17.9674	0.290449	16.3633	-0.397257	0.687706	-0.151439	#N/A	#N/A	#N/A
YDR313C	15.7315	-0.0384978	19.054	-0.101504	0.0630057	-0.15146	#N/A	#N/A	#N/A
YJR093C	17.3977	0.206629	28.3264	0.917703	-0.711074	-0.151926	#N/A	#N/A	#N/A
YDL106C	20.9187	0.724642	25.5436	0.611825	0.112816	-0.152481	#N/A	#N/A	#N/A
YDR153C	15.0398	-0.140263	25.5428	0.611735	-0.751998	-0.152955	#N/A	#N/A	#N/A
YFR040W	24.8563	1.30394	33.749	1.51375	-0.20981	-0.154351	#N/A	#N/A	#N/A
YOL051W	30.8503	2.18577	33.9884	1.54006	0.64571	-0.154382	#N/A	#N/A	#N/A
YBR101C	14.1972	-0.264228	15.8904	-0.449231	0.185004	-0.15474	#N/A	#N/A	#N/A
YBR002C	5.50596	-1.54287	8.67413	-1.24243	-0.300442	-0.154954	#N/A	#N/A	#N/A
YGR281W	20.9685	0.731962	22.9998	0.332217	0.399745	-0.155088	#N/A	#N/A	#N/A
YMR090W	7.73867	-1.2144	5.90295	-1.54703	0.332634	-0.156209	#N/A	#N/A	#N/A
YBL103C	25.577	1.40996	32.4942	1.37581	0.0341481	-0.156675	#N/A	#N/A	#N/A
YMR146C	10.8246	-0.7604	10.2755	-1.06641	0.30601	-0.156842	#N/A	#N/A	#N/A
YLR276C	23.508	1.10557	26.7171	0.740816	0.364757	-0.157001	#N/A	#N/A	#N/A
YMR189W	5.13668	-1.5972	12.1014	-0.865712	-0.731488	-0.157382	#N/A	#N/A	#N/A
YCR037C	11.9516	-0.594601	20.8711	0.0982285	-0.692829	-0.157631	#N/A	#N/A	#N/A
YAL013W	15.0795	-0.134429	16.1399	-0.421806	0.287377	-0.157954	#N/A	#N/A	#N/A
YBL017C	24.9119	1.31211	34.4899	1.59517	-0.283067	-0.157988	#N/A	#N/A	#N/A
YMR070W	11.7272	-0.627603	10.5108	-1.04054	0.412942	-0.158408	#N/A	#N/A	#N/A
YKL085W	6.39086	-1.41269	5.86446	-1.55126	0.138576	-0.158417	#N/A	#N/A	#N/A
YHR115C	13.4004	-0.381442	17.7999	-0.239343	-0.142099	-0.158663	#N/A	#N/A	#N/A
YBL081W	24.7531	1.28875	29.5787	1.05536	0.233392	-0.15869	#N/A	#N/A	#N/A
YDL114W-A	9.02839	-1.02466	11.7259	-0.906991	-0.117665	-0.158728	#N/A	#N/A	#N/A
YML081W	30.9475	2.20007	37.9392	1.97432	0.225752	-0.158816	#N/A	#N/A	#N/A
YLR191W	4.7001	-1.66143	6.01488	-1.53473	-0.126702	-0.159536	#N/A	#N/A	#N/A
YPL022W	21.8228	0.857643	32.596	1.38701	-0.529369	-0.159635	#N/A	#N/A	#N/A
YJL005W	21.401	0.795588	31.959	1.31699	-0.5214	-0.15976	#N/A	#N/A	#N/A
YJL186W	16.9034	0.133908	16.4048	-0.392691	0.5266	-0.160478	#N/A	#N/A	#N/A
YLL040C	27.4087	1.67945	31.9306	1.31387	0.36558	-0.160514	#N/A	#N/A	#N/A
YOR043W	19.5019	0.516203	26.4863	0.715447	-0.199243	-0.16059	#N/A	#N/A	#N/A
YGR012W	7.30523	-1.27817	7.9013	-1.32738	0.0492125	-0.160637	#N/A	#N/A	#N/A
YKL116C	6.59701	-1.38236	9.01899	-1.20452	-0.177834	-0.160674	#N/A	#N/A	#N/A
YGR178C	21.6948	0.838822	27.7604	0.855486	-0.0166639	-0.161082	#N/A	#N/A	#N/A
YGR103W	25.0754	1.33617	30.3293	1.13786	0.198308	-0.161456	#N/A	#N/A	#N/A
YOR275C	18.7056	0.399051	23.6916	0.408257	-0.00920595	-0.161565	#N/A	#N/A	#N/A
YBR140C	25.3496	1.3765	34.016	1.54309	-0.166585	-0.16166	#N/A	#N/A	#N/A
YOR212W	12.9135	-0.453088	11.3994	-0.942879	0.489791	-0.161697	#N/A	#N/A	#N/A
YHR089C	7.39476	-1.26499	8.15499	-1.29949	0.0344998	-0.16181	#N/A	#N/A	#N/A
YHR024C	11.6086	-0.645062	19.728	-0.0274141	-0.617648	-0.161826	#N/A	#N/A	#N/A
YIL133C	6.03492	-1.46505	5.24862	-1.61895	0.153902	-0.161855	#N/A	#N/A	#N/A
YOR017W	25.0186	1.32781	27.4995	0.826814	0.500999	-0.162137	#N/A	#N/A	#N/A
YPR115W	17.828	0.269942	25.543	0.611755	-0.341813	-0.162253	#N/A	#N/A	#N/A
YHR098C	27.9058	1.75257	33.4294	1.47862	0.273951	-0.162281	#N/A	#N/A	#N/A
YLR138W	21.4215	0.798608	27.4869	0.825431	-0.0268228	-0.162872	#N/A	#N/A	#N/A
YMR161W	9.75103	-0.918342	12.4035	-0.83251	-0.0858329	-0.163093	#N/A	#N/A	#N/A
YPR112C	25.9268	1.46142	33.2548	1.45941	0.00200996	-0.163209	#N/A	#N/A	#N/A
YOL081W	27.9482	1.75881	39.3652	2.13106	-0.37225	-0.163579	#N/A	#N/A	#N/A
YOL139C	9.59286	-0.941612	10.3796	-1.05496	0.113352	-0.163945	#N/A	#N/A	#N/A
YMR140W	15.4852	-0.0747333	27.325	0.80763	-0.882363	-0.163998	#N/A	#N/A	#N/A
YOR160W	26.3438	1.52277	32.3516	1.36015	0.162624	-0.164169	#N/A	#N/A	#N/A
YBL024W	27.6217	1.71077	33.8331	1.52299	0.187786	-0.164456	#N/A	#N/A	#N/A
YDR243C	14.013	-0.291323	16.3729	-0.396201	0.104878	-0.164529	#N/A	#N/A	#N/A
YDR116C	7.04312	-1.31673	8.12102	-1.30323	-0.0134993	-0.164975	#N/A	#N/A	#N/A
YMR131C	10.822	-0.760779	19.3803	-0.0656335	-0.695146	-0.16528	#N/A	#N/A	#N/A
YLR389C	11.054	-0.726654	20.0844	0.0117551	-0.738409	-0.165356	#N/A	#N/A	#N/A
YLL043W	21.8658	0.863976	29.7137	1.07019	-0.206217	-0.165461	#N/A	#N/A	#N/A
YDR350C	23.4441	1.09617	21.0428	0.117106	0.979063	-0.165489	#N/A	#N/A	#N/A
YLR394W	8.9283	-1.03938	9.21031	-1.18349	0.144114	-0.165797	#N/A	#N/A	#N/A
YDL016C	11.9514	-0.594622	19.4577	-0.0571232	-0.537499	-0.166512	#N/A	#N/A	#N/A
YLR201C	10.781	-0.766814	17.7744	-0.24215	-0.524664	-0.166995	#N/A	#N/A	#N/A
YDL207W	17.782	0.263171	26.5548	0.72297	-0.459799	-0.167417	#N/A	#N/A	#N/A
YNL307C	19.8225	0.563359	30.9937	1.21089	-0.647528	-0.16782	#N/A	#N/A	#N/A
YOR123C	12.8413	-0.463702	22.055	0.228364	-0.692065	-0.167823	#N/A	#N/A	#N/A
YFL039C	11.4931	-0.662046	11.0279	-0.98371	0.321664	-0.168141	#N/A	#N/A	#N/A
YKL073W	16.5897	0.0877598	25.6904	0.627959	-0.540199	-0.168241	#N/A	#N/A	#N/A
YLR186W	5.71179	-1.51259	6.01362	-1.53487	0.0222758	-0.168298	#N/A	#N/A	#N/A
YDR498C	11.9329	-0.597348	6.98404	-1.4282	0.830854	-0.168776	#N/A	#N/A	#N/A
YKL088W	6.48137	-1.39937	18.0688	-0.20979	-1.18958	-0.168781	#N/A	#N/A	#N/A
YNL154C	22.2092	0.914495	24.0258	0.444993	0.469502	-0.169147	#N/A	#N/A	#N/A
YEL024W	10.3176	-0.834988	10.4994	-1.0418	0.206811	-0.169396	#N/A	#N/A	#N/A
YOR270C	21.9745	0.879968	29.5675	1.05412	-0.174156	-0.16987	#N/A	#N/A	#N/A
YPL023C	19.994	0.588593	25.4975	0.606759	-0.0181657	-0.169871	#N/A	#N/A	#N/A
YDR477W	25.2325	1.35928	33.7585	1.51478	-0.155501	-0.170357	#N/A	#N/A	#N/A
YDR432W	14.3618	-0.240015	18.3691	-0.176787	-0.0632283	-0.170786	#N/A	#N/A	#N/A
YAL056W	20.6813	0.68971	25.0957	0.562592	0.127118	-0.171453	#N/A	#N/A	#N/A
YGR108W	10.4525	-0.815139	5.95939	-1.54083	0.725689	-0.171557	#N/A	#N/A	#N/A
YPL074W	22.8541	1.00938	29.6984	1.06851	-0.0591279	-0.171783	#N/A	#N/A	#N/A
YPL116W	20.2061	0.619793	35.2183	1.67524	-1.05545	-0.172991	#N/A	#N/A	#N/A
YDL074C	18.3502	0.346767	20.901	0.101523	0.245244	-0.173663	#N/A	#N/A	#N/A
YDL206W	6.01783	-1.46757	12.9789	-0.769262	-0.698305	-0.174181	#N/A	#N/A	#N/A
YOR291W	14.7144	-0.188132	22.5295	0.280515	-0.468647	-0.174613	#N/A	#N/A	#N/A
YIR003W	19.1789	0.468683	25.4225	0.59851	-0.129827	-0.174786	#N/A	#N/A	#N/A
YNL011C	6.09515	-1.45619	8.36877	-1.27599	-0.180197	-0.174833	#N/A	#N/A	#N/A
YJR033C	14.1082	-0.277316	22.3309	0.25869	-0.536007	-0.175474	#N/A	#N/A	#N/A
YPL261C	26.0638	1.48157	29.0408	0.996227	0.485348	-0.175557	#N/A	#N/A	#N/A
YDR398W	22.428	0.946686	25.5311	0.610451	0.336235	-0.175871	#N/A	#N/A	#N/A
YGL036W	21.9001	0.869025	25.5098	0.608111	0.260914	-0.176223	#N/A	#N/A	#N/A
YPR161C	24.4604	1.24569	31.0369	1.21563	0.03006	-0.176312	#N/A	#N/A	#N/A
YOR201C	6.81733	-1.34994	8.09769	-1.30579	-0.0441524	-0.176462	#N/A	#N/A	#N/A
YJL198W	18.4807	0.365962	31.9463	1.31559	-0.949627	-0.177157	#N/A	#N/A	#N/A
YJL214W	7.13959	-1.30254	6.32782	-1.50033	0.197796	-0.177588	#N/A	#N/A	#N/A
YDR334W	34.1257	2.66763	37.0137	1.87259	0.795047	-0.177804	#N/A	#N/A	#N/A
YMR171C	25.1842	1.35217	20.1332	0.0171284	1.33504	-0.177943	#N/A	#N/A	#N/A
YOL130W	20.2355	0.62413	28.8371	0.973841	-0.349711	-0.178166	#N/A	#N/A	#N/A
YGL167C	25.4771	1.39526	36.4951	1.81558	-0.42032	-0.17827	#N/A	#N/A	#N/A
YML006C	18.6634	0.392836	15.0457	-0.542079	0.934915	-0.178649	#N/A	#N/A	#N/A
YHL034C	14.3644	-0.23963	17.2937	-0.294992	0.0553613	-0.178784	#N/A	#N/A	#N/A
YKL126W	23.9174	1.16581	30.3404	1.13907	0.0267318	-0.178925	#N/A	#N/A	#N/A
YGL115W	9.75855	-0.917235	15.14	-0.531718	-0.385518	-0.179092	#N/A	#N/A	#N/A
YDR448W	17.7958	0.265201	31.4364	1.25954	-0.994343	-0.179149	#N/A	#N/A	#N/A
YDL140C	27.9961	1.76586	34.5077	1.59714	0.168724	-0.179446	#N/A	#N/A	#N/A
YFR021W	7.01468	-1.32091	6.12533	-1.52259	0.201678	-0.17965	#N/A	#N/A	#N/A
YBR290W	19.4474	0.508181	28.4177	0.927737	-0.419556	-0.179821	#N/A	#N/A	#N/A
YNL232W	10.9756	-0.738186	7.73702	-1.34543	0.607249	-0.180525	#N/A	#N/A	#N/A
YGL140C	24.9494	1.31764	33.6919	1.50746	-0.189828	-0.180954	#N/A	#N/A	#N/A
YIL149C	31.2292	2.24151	39.1224	2.10437	0.137139	-0.180967	#N/A	#N/A	#N/A
YIL042C	9.69608	-0.926426	8.23927	-1.29023	0.363803	-0.181673	#N/A	#N/A	#N/A
YGR017W	14.834	-0.170542	10.6415	-1.02618	0.85564	-0.181772	#N/A	#N/A	#N/A
YJR062C	18.9555	0.435817	29.0971	1.00241	-0.566593	-0.181964	#N/A	#N/A	#N/A
YMR108W	20.7168	0.694935	26.6287	0.731099	-0.0361643	-0.182328	#N/A	#N/A	#N/A
YOR023C	27.4888	1.69122	27.4994	0.826795	0.864423	-0.183301	#N/A	#N/A	#N/A
YAL032C	10.9247	-0.74567	9.09091	-1.19662	0.450949	-0.183591	#N/A	#N/A	#N/A
YDR272W	9.33976	-0.978848	6.65669	-1.46418	0.485335	-0.183714	#N/A	#N/A	#N/A
YLR403W	25.9098	1.45892	34.3941	1.58465	-0.125726	-0.184204	#N/A	#N/A	#N/A
YMR215W	8.71366	-1.07096	10.5259	-1.03889	-0.0320716	-0.184264	#N/A	#N/A	#N/A
YPL146C	12.2495	-0.550774	16.1763	-0.41781	-0.132964	-0.184943	#N/A	#N/A	#N/A
YGL097W	17.418	0.209615	22.6905	0.298212	-0.0885967	-0.185155	#N/A	#N/A	#N/A
YLR175W	18.4931	0.367778	29.0149	0.993382	-0.625604	-0.185291	#N/A	#N/A	#N/A
YLR248W	19.059	0.451032	24.5574	0.503424	-0.0523926	-0.185719	#N/A	#N/A	#N/A
YGR223C	14.5886	-0.206636	14.7415	-0.575518	0.368882	-0.186414	#N/A	#N/A	#N/A
YGL049C	29.0761	1.92474	33.0854	1.4408	0.483941	-0.18647	#N/A	#N/A	#N/A
YGL059W	5.32555	-1.56941	8.30375	-1.28314	-0.286272	-0.186769	#N/A	#N/A	#N/A
YNL152W	13.0518	-0.432741	11.9794	-0.879122	0.446381	-0.186954	#N/A	#N/A	#N/A
YPR185W	13.295	-0.396962	26.9425	0.765588	-1.16255	-0.187204	#N/A	#N/A	#N/A
YDR165W	9.95946	-0.887677	12.1339	-0.862144	-0.0255331	-0.187436	#N/A	#N/A	#N/A
YMR304W	23.3651	1.08455	27.0958	0.782441	0.302107	-0.188683	#N/A	#N/A	#N/A
YMR086W	21.2173	0.768565	32.7907	1.40841	-0.639846	-0.189426	#N/A	#N/A	#N/A
YJL154C	22.3985	0.942346	34.3042	1.57476	-0.632419	-0.189816	#N/A	#N/A	#N/A
YMR115W	7.25042	-1.28623	10.0693	-1.08908	-0.197152	-0.190192	#N/A	#N/A	#N/A
YEL037C	22.4225	0.945872	29.1813	1.01167	-0.0657967	-0.191036	#N/A	#N/A	#N/A
YCL063W	10.3944	-0.823695	13.5567	-0.705747	-0.117948	-0.191262	#N/A	#N/A	#N/A
YLL036C	14.7961	-0.176116	14.1034	-0.645658	0.469542	-0.191779	#N/A	#N/A	#N/A
YLR240W	16.6406	0.0952474	23.1865	0.35274	-0.257493	-0.191785	#N/A	#N/A	#N/A
YJL084C	21.4944	0.809332	29.9355	1.09458	-0.285244	-0.191884	#N/A	#N/A	#N/A
[truncated: 250 more rows]

## Sheet: S6A
Gene list	Disome X_log10(RPKM)	Disome X_log10_K4, Z-score		Gene list	WT_log10(RPKM)	WT_log10_K4, Z-score
YLR256W-A	0.170099	1.63864		YLR256W-A	0.0604746	1.35832
YOL152W	0.298234	1.28437		YOL152W	0.0734372	1.39839
YKL036C	0.0905514	1.89065		YKL036C	0.14453	1.88376
YGL041C-B	0.516203	1.59963		YGL041C-B	0.172301	1.57348
YLR349W	0.298376	1.33231		YLR349W	0.199389	1.43128
YAR047C	0.455208	1.3425		YAR047C	0.210139	1.38916
YCR105W	0.366641	1.62959		YCR105W	0.266506	1.65081
YKL165C-A	0.556047	1.15795		YKL165C-A	0.302956	1.15838
YDL094C	0.338463	1.04279		YDL094C	0.355335	1.29148
YGR225W	0.308484	1.6439		YGR225W	0.364067	1.64501
YGL024W	0.35634	1.95838		YGL024W	0.392127	1.88435
YDL210W	0.428861	1.00625		YDL210W	0.416258	0.863649
YIL166C	0.530813	1.05517		YIL166C	0.443673	1.12029
YNR071C	0.601994	1.61501		YNR071C	0.444297	1.67354
YMR306C-A	0.36199	1.46493		YMR306C-A	0.45677	1.3069
YBL048W	0.556601	1.64258		YBL048W	0.486208	1.65931
YOR343W-B	0.599235	1.27095		YOR343W-B	0.499922	1.26939
YPL185W	0.462915	0.992469		YPL185W	0.503755	1.09096
YER179W	0.430407	1.43571		YER179W	0.534079	0.785689
YOR177C	0.800987	1.68043		YOR177C	0.561224	1.63584
YNL143C	0.314055	1.55026		YNL143C	0.57029	1.69769
YHR071C-A	0.744409	1.70455		YHR071C-A	0.58436	1.82082
YBR292C	0.78144	1.57955		YBR292C	0.589232	1.63878
YHL042W	0.813659	1.50362		YHL042W	0.612567	1.54432
YKR103W	0.765292	1.89863		YKR103W	0.615073	1.84574
YLL059C	0.551151	0.813498		YLL059C	0.615229	1.13672
YGR188C	0.651593	1.1024		YGR188C	0.636113	1.00558
YLL057C	0.716323	0.923141		YLL057C	0.63918	0.900398
YGR144W	0.625436	1.24267		YGR144W	0.644923	1.28501
YNL057W	0.643026	1.5059		YNL057W	0.651597	1.62384
YJR108W	0.724333	1.7634		YJR108W	0.673174	1.73662
YBR136W	0.701884	1.30594		YBR136W	0.71221	1.28514
YBL013W	0.650714	1.23913		YBL013W	0.726907	1.13339
YKR012C	0.696309	1.66671		YKR012C	0.727983	1.66166
YCL037C	0.671255	2.00964		YCL037C	0.73892	1.97016
YBL005W-B	0.982652	1.55007		YBL005W-B	0.748812	1.32965
YFL055W	0.971772	1.77539		YFL055W	0.752324	1.75238
YLR446W	0.701563	1.24033		YLR446W	0.786297	1.50996
YIL089W	0.986562	1.23249		YIL089W	0.788608	1.33933
YOR192C	0.887776	1.69105		YOR192C	0.79096	1.68926
YNR002C	0.766931	1.41263		YNR002C	0.793383	1.49363
YGR064W	1.01824	1.94204		YGR064W	0.798669	1.9008
YKR054C	0.849315	1.69909		YKR054C	0.833611	1.64134
YDR528W	0.895154	1.37419		YDR528W	0.88729	1.44568
YPL153C	0.922613	0.796815		YPL153C	0.897982	0.728815
YGL177W	1.01526	1.47058		YGL177W	0.89875	1.65655
YLL025W	1.01146	1.00304		YLL025W	0.899278	1.12498
YNR063W	0.964501	1.33532		YNR063W	0.907269	1.01731
YNR069C	0.981498	1.36671		YNR069C	0.914754	1.13228
YDR241W	1.0158	1.81687		YDR241W	0.917127	1.74785
YEL030W	0.974447	1.27679		YEL030W	0.921008	1.41298
YER132C	0.992581	1.71996		YER132C	0.932722	1.681
YJR053W	0.979027	1.66097		YJR053W	0.94208	1.60569
YNL273W	0.894441	1.08554		YNL273W	0.944255	1.32059
YBR213W	0.953715	0.785156		YBR213W	0.948748	0.958989
YBR295W	0.999588	1.30135		YBR295W	0.949592	1.32625
YGL251C	0.848442	1.09099		YGL251C	0.958106	1.34632
YAL024C	0.973305	1.63986		YAL024C	0.958484	1.63438
YLR024C	0.980527	1.39084		YLR024C	0.958636	1.5361
YDR180W	0.979989	1.38012		YDR180W	0.958835	1.31262
YCR032W	0.978413	1.70951		YCR032W	0.966327	1.63643
YMR207C	0.970429	1.39858		YMR207C	0.968223	1.46055
YBR098W	0.922247	1.24442		YBR098W	0.971142	1.39515
YBL034C	0.951981	1.70828		YBL034C	0.977876	1.70468
YOR349W	1.02797	1.41184		YOR349W	0.978426	1.36636
YDL149W	1.00298	1.42436		YDL149W	0.980251	1.45588
YLR454W	1.00211	1.44059		YLR454W	0.981765	1.58792
YDR369C	1.03598	1.13573		YDR369C	0.982895	0.97572
YDR314C	1.03349	1.80745		YDR314C	0.983102	1.75214
YBL097W	1.06249	1.77708		YBL097W	0.983208	1.65207
YDR270W	0.917803	1.04279		YDR270W	0.994861	1.20697
YNL172W	1.02427	1.45895		YNL172W	0.995399	1.49326
YJL102W	0.970594	1.35034		YJL102W	0.999521	1.37628
YDL211C	1.05643	1.66468		YDL211C	1.00117	1.72883
YKR009C	0.965608	0.787835		YKR009C	1.00488	1.0192
YKL055C	1.06644	1.43004		YKL055C	1.00554	1.32721
YNL242W	1.01503	0.881822		YNL242W	1.0066	1.14357
YNR066C	1.06647	1.61197		YNR066C	1.00723	1.62098
YGR217W	0.999745	1.87469		YGR217W	1.00813	1.87954
YPR030W	0.868888	1.19168		YPR030W	1.0094	1.2001
YLR289W	0.986261	1.72174		YLR289W	1.00962	1.6544
YOL141W	1.02125	0.985044		YOL141W	1.01338	0.921801
YLR233C	1.06303	0.809793		YLR233C	1.01417	1.27587
YOL075C	1.06374	1.37155		YOL075C	1.01633	1.48198
YLR318W	1.08304	1.66338		YLR318W	1.01663	1.63477
YCR081W	1.02972	1.83946		YCR081W	1.01776	1.78924
YKL188C	1.04765	1.06954		YKL188C	1.01988	1.08949
YHR164C	1.07706	1.70681		YHR164C	1.02023	1.77242
YBR097W	1.02646	1.6885		YBR097W	1.02883	1.6974
YPL194W	0.993759	1.23627		YPL194W	1.02963	1.28121
YPL258C	1.03319	1.34869		YPL258C	1.03213	1.31754
YNL250W	1.04016	1.58627		YNL250W	1.03762	1.53199
YDR104C	1.06085	1.5602		YDR104C	1.03856	1.59298
YPL253C	1.07485	1.7751		YPL253C	1.04068	1.69983
YJL194W	1.13165	1.71298		YJL194W	1.04179	1.69884
YOL095C	1.05273	1.40051		YOL095C	1.04506	1.4252
YDR406W	1.02571	1.44564		YDR406W	1.04568	1.50901
YDR242W	1.08574	1.00201		YDR242W	1.04586	1.2386
YIL006W	1.03123	1.87818		YIL006W	1.04639	1.90164
YMR257C	1.08299	1.69223		YMR257C	1.04724	1.55415
YCR061W	1.08541	1.23335		YCR061W	1.04888	1.51482
YLL063C	1.12466	1.29977		YLL063C	1.04921	1.17752
YML037C	1.15735	1.67566		YML037C	1.05336	1.68121
YBR128C	1.05358	1.07167		YBR128C	1.05417	1.32849
YER184C	0.97003	0.95596		YER184C	1.05506	1.15894
YMR025W	1.11072	1.44138		YMR025W	1.06301	1.38493
YNL328C	1.11988	1.61827		YNL328C	1.06316	1.61885
YJL185C	1.09212	0.977842		YJL185C	1.06499	0.591168
YIL132C	1.12901	0.961987		YIL132C	1.06705	1.03202
YDL109C	1.09602	1.69582		YDL109C	1.06843	1.68827
YHR210C	1.07786	1.31095		YHR210C	1.06881	1.44929
YJL161W	1.1547	1.25685		YJL161W	1.07118	0.943734
YOR003W	1.12769	0.901509		YOR003W	1.07161	1.13854
YLR187W	1.00367	1.61823		YLR187W	1.07368	1.66472
YLR315W	1.05325	1.64303		YLR315W	1.07504	1.67769
YMR094W	1.09597	1.3638		YMR094W	1.07778	1.17678
YIL120W	1.06746	1.55345		YIL120W	1.07847	1.64224
YKL203C	1.08433	1.69464		YKL203C	1.08553	1.67794
YGL229C	1.13476	1.1163		YGL229C	1.08576	1.00964
YMR190C	1.07536	1.54019		YMR190C	1.08697	1.57525
YKL089W	1.09064	1.33405		YKL089W	1.08919	1.3778
YCR089W	1.19778	1.57533		YCR089W	1.0903	1.58651
YNL009W	1.07356	1.32547		YNL009W	1.09044	1.16963
YDL160C-A	1.19898	1.2607		YDL160C-A	1.09175	1.26149
YOL164W	1.23097	1.35182		YOL164W	1.09233	1.3991
YHR178W	1.07027	1.36698		YHR178W	1.09233	1.33551
YEL064C	1.07983	1.0542		YEL064C	1.09664	1.27835
YLR035C	1.11497	1.12114		YLR035C	1.09811	1.18006
YJR154W	1.22826	1.29332		YJR154W	1.09934	1.18835
YDL223C	1.11665	0.891275		YDL223C	1.10324	1.19703
YHL036W	1.30248	1.40154		YHL036W	1.10445	1.51442
YLR010C	1.21798	1.43038		YLR010C	1.10592	1.21231
YJR030C	1.09178	1.30815		YJR030C	1.10613	1.2785
YNL278W	1.03779	1.18122		YNL278W	1.11014	1.11004
YER053C-A	1.23385	1.35935		YER053C-A	1.1105	1.07268
YHR180W	1.12243	1.27165		YHR180W	1.11108	1.11807
YHL018W	1.10212	1.92565		YHL018W	1.11365	1.88951
YNL082W	1.14209	1.36884		YNL082W	1.11567	1.33562
YJR138W	1.12186	1.70969		YJR138W	1.11621	1.71433
YHR109W	1.13725	1.58368		YHR109W	1.11941	1.5654
YJL206C	1.11764	1.58047		YJL206C	1.12094	1.50568
YPL191C	1.14711	1.28332		YPL191C	1.12116	1.37794
YLR164W	1.14044	1.04191		YLR164W	1.12117	1.11836
YHR048W	1.03003	1.23177		YHR048W	1.12117	1.36347
YOL078W	1.08265	1.71322		YOL078W	1.12176	1.54421
YDL138W	1.10082	1.43196		YDL138W	1.12305	1.51157
YKL093W	0.937141	1.42076		YKL093W	1.12482	1.54536
YCR106W	1.18289	1.3243		YCR106W	1.12687	1.34514
YDL104C	1.15503	1.51962		YDL104C	1.12771	1.53588
YPL005W	1.11475	1.59077		YPL005W	1.1289	1.60118
YFR019W	1.16167	1.76007		YFR019W	1.1294	1.72469
YJR035W	1.16774	1.60822		YJR035W	1.13155	1.51802
YNL102W	1.14837	1.29039		YNL102W	1.13215	1.48927
YER111C	1.14186	1.24888		YER111C	1.13259	1.32613
YLR176C	1.06531	1.29064		YLR176C	1.13446	1.41847
YPR116W	1.20526	1.41855		YPR116W	1.13474	1.36085
YDR421W	1.096	1.43084		YDR421W	1.13474	1.6017
YNL106C	1.18667	1.73356		YNL106C	1.13564	1.59643
YJL070C	1.14004	1.17285		YJL070C	1.13605	1.18402
YHR099W	1.0951	1.81807		YHR099W	1.13611	1.7626
YOL117W	1.12064	1.29545		YOL117W	1.13618	1.47775
YPL016W	1.03085	1.11741		YPL016W	1.14122	1.39015
YDR034C-A	1.14235	1.43196		YDR034C-A	1.14428	1.3765
YCR007C	1.21527	1.32676		YCR007C	1.14477	1.26116
YFR027W	1.10275	1.21205		YFR027W	1.14482	1.31601
YOR380W	1.12986	1.4872		YOR380W	1.1461	1.41507
YMR176W	1.18827	1.40737		YMR176W	1.15086	1.45071
YLL040C	1.13262	1.7263		YLL040C	1.15307	1.71291
YBL063W	1.09943	1.69699		YBL063W	1.154	1.71953
YLR425W	1.12392	1.7529		YLR425W	1.15419	1.77488
YOR114W	1.15191	0.870415		YOR114W	1.15632	1.10081
YKL048C	1.16867	1.87796		YKL048C	1.1596	1.81241
YPL110C	1.23466	1.53464		YPL110C	1.16049	1.30567
YGL064C	1.23431	1.54283		YGL064C	1.1632	1.51872
YGR238C	1.09944	0.930198		YGR238C	1.16396	1.25838
YOR144C	1.15889	1.29608		YOR144C	1.1649	1.44403
YLR135W	1.19956	1.49317		YLR135W	1.1651	1.46637
YBL037W	1.21905	1.71976		YBL037W	1.16516	1.72487
YNL249C	1.20409	1.59845		YNL249C	1.16559	1.59601
YMR179W	1.19024	1.37398		YMR179W	1.16631	1.39534
YPL257W	1.33915	1.22329		YPL257W	1.16679	1.04378
YDR323C	1.16794	1.66277		YDR323C	1.16745	1.61852
YDR254W	1.21772	1.32274		YDR254W	1.1688	1.07873
YOR129C	1.15404	1.51925		YOR129C	1.16912	1.528
YIR029W	1.17422	0.715366		YIR029W	1.16978	0.615181
YDR125C	1.16155	1.22301		YDR125C	1.17027	1.29308
YLL013C	1.17581	1.72341		YLL013C	1.17283	1.72361
YCR006C	0.985861	1.6194		YCR006C	1.17372	1.50432
YHR172W	1.14861	1.50751		YHR172W	1.17374	1.52677
YLR456W	1.29488	0.927583		YLR456W	1.17542	0.855538
YHL035C	1.18275	1.65564		YHL035C	1.17698	1.57626
YPL058C	1.295	1.23485		YPL058C	1.17701	1.26232
YER024W	1.24268	0.868286		YER024W	1.17716	1.18592
YPL040C	1.22069	1.71386		YPL040C	1.17823	1.66151
YKL163W	1.31936	0.822418		YKL163W	1.18038	0.94322
YOL033W	1.2327	1.48108		YOL033W	1.1818	1.40685
YLR067C	1.2104	1.76792		YLR067C	1.18262	1.70483
YLR424W	1.14968	1.5583		YLR424W	1.18295	1.57366
YMR204C	1.17095	1.71672		YMR204C	1.18426	1.64678
YDR058C	1.30858	1.11998		YDR058C	1.18552	1.10236
YMR106C	1.21963	1.1268		YMR106C	1.18697	1.19963
YAL061W	1.08452	1.44346		YAL061W	1.1875	1.45975
YKL197C	1.23913	1.69902		YKL197C	1.18946	1.69038
YGR233C	1.18179	1.52545		YGR233C	1.19205	1.55666
YMR287C	1.20884	1.89521		YMR287C	1.19242	1.87729
YIL150C	1.22225	1.68543		YIL150C	1.19265	1.69209
YDL057W	1.11128	0.919431		YDL057W	1.19341	1.08856
YDR386W	1.21205	1.5009		YDR386W	1.19462	1.45984
YKL134C	1.18189	1.64228		YKL134C	1.19469	1.50773
YLR227C	1.27436	1.30777		YLR227C	1.19744	1.35293
YGR212W	1.23736	1.47823		YGR212W	1.19985	1.58445
YBL029W	1.29228	0.978443		YBL029W	1.19993	1.15777
YPR083W	1.2068	1.84529		YPR083W	1.2011	1.78649
YJL095W	1.19965	1.71346		YJL095W	1.2024	1.63609
YGR288W	1.22512	0.927978		YGR288W	1.2025	0.944571
YEL062W	1.21673	1.58269		YEL062W	1.20316	1.5657
YGR070W	1.15789	1.35957		YGR070W	1.20334	1.56968
YBR280C	1.17549	1.37526		YBR280C	1.20442	1.51107
YPL029W	1.24571	1.63132		YPL029W	1.20443	1.52862
YBL080C	1.15847	1.72207		YBL080C	1.20499	1.70389
YLR272C	1.21978	1.58854		YLR272C	1.20648	1.54307
YDL059C	1.29	1.63977		YDL059C	1.2071	1.63061
YJL025W	1.20873	1.70922		YJL025W	1.20861	1.74432
YBL035C	1.24855	1.18665		YBL035C	1.20921	1.23227
YER041W	1.3034	1.75795		YER041W	1.21312	1.7356
YMR163C	1.17009	1.7043		YMR163C	1.21374	1.72345
YLL054C	1.20371	1.36521		YLL054C	1.2146	1.34902
YLR047C	1.17493	1.2119		YLR047C	1.21467	0.988084
YOR156C	1.21281	1.70177		YOR156C	1.21678	1.63149
YML050W	1.26809	1.59298		YML050W	1.21922	1.55234
YDR014W	1.20878	1.70853		YDR014W	1.2209	1.63718
YPL269W	1.20559	1.75616		YPL269W	1.22093	1.72687
YGR271W	1.24285	1.67227		YGR271W	1.22123	1.63022
YKL033W	1.25984	1.32856		YKL033W	1.22341	1.3272
YKR077W	1.22903	1.30341		YKR077W	1.22365	1.39552
YJL058C	1.26379	1.59349		YJL058C	1.22431	1.38336
YMR063W	1.17148	1.49181		YMR063W	1.22529	1.62728
YER093C	1.19594	1.70479		YER093C	1.22566	1.75375
YLR127C	1.22125	1.71498		YLR127C	1.22664	1.58481
YDR126W	1.30606	1.21421		YDR126W	1.22977	1.04332
YML109W	1.2437	1.17343		YML109W	1.2298	1.16752
YHL010C	1.15467	1.10079		YHL010C	1.23	1.03757
YLR103C	1.24491	1.02076		YLR103C	1.23023	1.1346
YJR033C	1.20808	1.80579		YJR033C	1.23046	1.85049
YMR023C	1.25931	1.62675		YMR023C	1.23158	1.44737
YLR136C	1.15411	1.23617		YLR136C	1.2316	1.29924
YHL030W	1.2517	1.65554		YHL030W	1.23178	1.65872
YPR068C	1.24976	1.23293		YPR068C	1.2322	1.22753
YOR291W	1.20116	1.62256		YOR291W	1.23397	1.74145
YOR284W	1.33694	1.15278		YOR284W	1.23476	1.23587
YKL201C	1.2608	1.59368		YKL201C	1.23556	1.62503
YER076C	1.2169	0.772424		YER076C	1.24066	1.05953
YKL198C	1.23173	1.74492		YKL198C	1.24126	1.83652
YBL104C	1.25276	1.75215		YBL104C	1.24135	1.7886
YDL107W	1.30796	1.65548		YDL107W	1.24237	1.71998
YJL083W	1.14661	1.4511		YJL083W	1.24299	1.53513
YIL045W	1.26515	1.34361		YIL045W	1.24299	1.27633
YHR166C	1.25872	1.92003		YHR166C	1.24331	1.84227
YFL033C	1.18949	1.68711		YFL033C	1.24335	1.7574
YBR275C	1.23006	1.52604		YBR275C	1.24411	1.56735
YBL008W	1.26706	1.69006		YBL008W	1.24476	1.66522
YPL072W	1.27108	1.74241		YPL072W	1.24505	1.77268
YMR162C	1.27639	1.66727		YMR162C	1.2455	1.62147
YML059C	1.25813	1.72151		YML059C	1.24554	1.74598
YER104W	1.27326	1.29555		YER104W	1.24633	1.4988
YDR499W	1.30972	1.74503		YDR499W	1.24655	1.73668
YGL104C	1.31747	0.881615		YGL104C	1.24735	1.13038
YCR024C	1.25267	1.60599		YCR024C	1.24742	1.55835
YMR055C	1.18847	1.48938		YMR055C	1.24911	1.59154
YOL128C	1.23867	1.56438		YOL128C	1.24945	1.61259
YDR150W	1.20587	1.86037		YDR150W	1.25008	1.86732
YLR032W	1.28621	0.977856		YLR032W	1.25055	1.0812
YCR101C	1.27028	1.65433		YCR101C	1.25069	1.40633
YPL085W	1.22577	1.83216		YPL085W	1.2512	1.75978
YEL072W	1.36161	1.51459		YEL072W	1.25121	1.53556
YDR131C	1.28037	1.38604		YDR131C	1.25198	1.40897
YOR022C	1.2542	1.6476		YOR022C	1.25201	1.57717
YHR120W	1.26809	1.69283		YHR120W	1.25205	1.63472
YPL124W	1.27379	1.51689		YPL124W	1.25291	1.44478
YJR031C	1.21444	1.7632		YJR031C	1.253	1.77444
YHR182W	1.28206	1.47335		YHR182W	1.25302	1.48319
YHR156C	1.30967	1.09088		YHR156C	1.25536	1.10217
YJR106W	1.24065	1.61561		YJR106W	1.25589	1.57695
YDR283C	1.25746	1.58671		YDR283C	1.25694	1.59602
YPR164W	1.31212	1.70043		YPR164W	1.25774	1.67832
YDL021W	1.52756	1.17082		YDL021W	1.25856	1.08757
YCL061C	1.29222	1.62774		YCL061C	1.2592	1.5765
YHR105W	1.35212	1.69191		YHR105W	1.261	1.70232
YKL121W	1.24957	1.53858		YKL121W	1.26145	1.56459
YJL051W	1.33839	1.61756		YJL051W	1.26216	1.54904
YOL089C	1.29019	1.71644		YOL089C	1.26249	1.72635
YDL077C	1.26969	1.69778		YDL077C	1.26383	1.65505
YMR065W	1.36056	1.8101		YMR065W	1.26425	1.74651
YNL126W	1.28748	1.66208		YNL126W	1.26532	1.56364
YNL331C	1.32195	1.19917		YNL331C	1.26532	1.3267
YBR239C	1.27082	1.78202		YBR239C	1.26546	1.77657
YLR381W	1.27247	1.49603		YLR381W	1.26564	1.51977
YIR007W	1.26774	1.23685		YIR007W	1.26663	1.26391
YEL048C	1.3168	1.39029		YEL048C	1.26706	1.42761
YKL222C	1.28813	1.57975		YKL222C	1.26808	1.32771
YHR023W	1.31818	1.75338		YHR023W	1.26947	1.75155
YJL207C	1.26603	1.79268		YJL207C	1.26955	1.76175
YKL090W	1.34545	1.73722		YKL090W	1.26963	1.7202
YPL060W	1.27764	0.943175		YPL060W	1.26976	1.01585
YOL023W	1.27408	1.80072		YOL023W	1.26985	1.67428
YBR156C	1.34974	1.48395		YBR156C	1.26996	1.4515
YLR376C	1.34674	1.58422		YLR376C	1.27065	1.55507
YER066W	1.28817	1.58851		YER066W	1.27106	1.46755
YPL241C	1.22757	0.918654		YPL241C	1.2711	0.854036
YDR420W	1.31177	1.77513		YDR420W	1.27116	1.74165
YDR089W	1.29073	0.923109		YDR089W	1.27209	0.924578
YPR121W	1.37422	1.5524		YPR121W	1.27427	1.50618
YJL059W	1.32586	1.46746		YJL059W	1.2755	1.37147
YPL077C	1.3295	1.68166		YPL077C	1.27552	1.67114
YMR160W	1.29529	1.88587		YMR160W	1.27639	1.92201
YPL120W	1.22933	1.63715		YPL120W	1.27641	1.66516
YML027W	1.37365	1.4557		YML027W	1.27781	1.29717
YDL216C	1.31191	1.61732		YDL216C	1.27854	1.64523
YHR155W	1.23396	1.75828		YHR155W	1.27868	1.70743
YDL044C	1.33165	1.55591		YDL044C	1.28182	1.67416
YJR135C	1.30578	1.78825		YJR135C	1.28282	1.78538
YPR003C	1.2977	1.63283		YPR003C	1.28413	1.57319
YNL304W	1.22756	1.50282		YNL304W	1.28486	1.65259
YFR022W	1.33713	1.22242		YFR022W	1.28667	1.30555
YAR023C	1.24487	0.841897		YAR023C	1.28682	1.12603
YDL206W	1.28502	1.24359		YDL206W	1.28727	1.3677
YJR137C	1.29825	1.6551		YJR137C	1.28757	1.63848
YJL047C	1.28514	1.70078		YJL047C	1.28765	1.67103
YDR069C	1.21664	1.599		YDR069C	1.28876	1.67784
YGL144C	1.27332	1.26737		YGL144C	1.28894	1.42733
YNR031C	1.25841	1.88881		YNR031C	1.28961	1.86922
YFR045W	1.30544	1.68729		YFR045W	1.29025	1.69131
YKR069W	1.37963	1.6799		YKR069W	1.29149	1.68673
YPR031W	1.25991	1.42109		YPR031W	1.29262	1.45869
YCR068W	1.35385	1.50165		YCR068W	1.29318	1.59105
YOL159C-A	1.45286	1.47035		YOL159C-A	1.2941	1.28591
YMR066W	1.25221	1.77105		YMR066W	1.29494	1.59068
YLR139C	1.29315	1.69027		YLR139C	1.29562	1.71385
YAL028W	1.24761	1.20595		YAL028W	1.29588	1.60132
YDR227W	1.29746	1.72381		YDR227W	1.29595	1.64247
YOR350C	1.24504	1.60886		YOR350C	1.2974	1.55663
YLR396C	1.2791	1.7734		YLR396C	1.29755	1.7678
YLL004W	1.37544	1.63601		YLL004W	1.29795	1.63875
YIR031C	1.27297	1.7445		YIR031C	1.29822	1.79079
YDR109C	1.35814	1.76495		YDR109C	1.29885	1.73635
YPR021C	1.3157	1.41183		YPR021C	1.29976	1.50836
YDR437W	1.34646	1.75459		YDR437W	1.3002	1.76784
YDR520C	1.29251	1.64577		YDR520C	1.30131	1.63757
YLR408C	1.35778	1.26615		YLR408C	1.30144	1.22617
YLR098C	1.34856	1.75637		YLR098C	1.30289	1.80834
YKL208W	1.42445	1.67372		YKL208W	1.30377	1.62174
YDR179W-A	1.35098	1.39573		YDR179W-A	1.30407	1.33387
YDR457W	1.29767	1.75133		YDR457W	1.30427	1.77132
YMR156C	1.18179	1.06765		YMR156C	1.3043	1.35698
YIL071C	1.3519	1.67305		YIL071C	1.30444	1.66009
YBL019W	1.36399	1.47649		YBL019W	1.30529	1.49672
YHR080C	1.25448	1.21021		YHR080C	1.30622	1.29975
YGL057C	1.30441	1.69		YGL057C	1.3063	1.66048
YJR129C	1.49505	1.23485		YJR129C	1.30668	1.02778
YOR336W	1.30055	1.40979		YOR336W	1.30673	1.55869
YPR111W	1.34624	1.73148		YPR111W	1.30869	1.68639
YDR282C	1.24206	0.875672		YDR282C	1.30875	1.26135
YPL123C	1.33141	1.3193		YPL123C	1.30878	1.3713
YNL187W	1.33386	1.55398		YNL187W	1.30921	1.66206
YOR371C	1.348	1.77263		YOR371C	1.30924	1.7757
YIR025W	1.30489	1.74038		YIR025W	1.30946	1.5922
YCR015C	1.31819	1.67486		YCR015C	1.30971	1.64826
YPL082C	1.30384	1.5994		YPL082C	1.30987	1.68471
YDR108W	1.34156	1.76223		YDR108W	1.31041	1.72537
YPR135W	1.33321	1.10873		YPR135W	1.31068	1.2139
YAL002W	1.3036	1.72511		YAL002W	1.31078	1.77974
YKR031C	1.28967	1.83108		YKR031C	1.31241	1.83991
YLR382C	1.32311	1.64423		YLR382C	1.31259	1.70941
YER101C	1.33515	1.45945		YER101C	1.31533	1.40651
YMR268C	1.31711	1.6955		YMR268C	1.31549	1.65435
YKL129C	1.32889	1.39704		YKL129C	1.31623	1.44887
YJL149W	1.32532	1.68762		YJL149W	1.31653	1.75445
YDL058W	1.3604	1.81412		YDL058W	1.31672	1.77598
YPL249C	1.344	1.46765		YPL249C	1.31672	1.51586
YKL108W	1.37444	1.37164		YKL108W	1.31679	1.45445
YLR402W	1.35395	1.80807		YLR402W	1.31711	1.80197
YMR168C	1.3095	1.83827		YMR168C	1.31721	1.74349
YGL133W	1.33103	1.4945		YGL133W	1.31839	1.50042
YMR166C	1.29959	1.79302		YMR166C	1.31853	1.79563
YMR164C	1.23768	1.47876		YMR164C	1.31858	1.56526
YML104C	1.32713	1.37485		YML104C	1.31945	1.32784
YFL008W	1.31889	1.61875		YFL008W	1.32059	1.64625
YHL023C	1.31192	1.71524		YHL023C	1.32104	1.63393
YBR150C	1.24736	1.72046		YBR150C	1.32299	1.72239
YOR249C	1.36461	1.69184		YOR249C	1.32309	1.60394
YNR047W	1.30405	1.81995		YNR047W	1.32346	1.89398
YNL127W	1.32508	1.75035		YNL127W	1.32346	1.67733
YER180C-A	1.43001	1.89152		YER180C-A	1.3249	1.88701
YKL038W	1.26597	1.85561		YKL038W	1.32561	1.77395
YMR087W	1.35075	1.20074		YMR087W	1.32626	1.54
YFL025C	1.32765	1.62374		YFL025C	1.32669	1.5973
YDR419W	1.30389	1.35995		YDR419W	1.32681	1.62927
YKL171W	1.26275	1.72631		YKL171W	1.32689	1.73316
YDR495C	1.34774	1.60302		YDR495C	1.32717	1.67803
YPL068C	1.31918	1.3526		YPL068C	1.32761	1.40735
YDR022C	1.37517	1.24598		YDR022C	1.32775	1.21447
YHL038C	1.39896	1.64928		YHL038C	1.32814	1.63377
YJR097W	1.33129	1.10591		YJR097W	1.32936	0.904376
YDR252W	1.41135	1.73497		YDR252W	1.32966	1.77778
YJL057C	1.38294	1.61992		YJL057C	1.33034	1.58337
YDR213W	1.2335	1.03759		YDR213W	1.33089	1.2958
YOL090W	1.38186	1.57882		YOL090W	1.33103	1.60865
YPL008W	1.34046	1.8424		YPL008W	1.33163	1.80107
YJL084C	1.2932	1.62872		YJL084C	1.33165	1.65762
YER137C	1.27415	1.25698		YER137C	1.33211	1.18377
YMR187C	1.36763	1.17153		YMR187C	1.33228	1.29657
YJL092W	1.34394	1.69022		YJL092W	1.33352	1.6552
YJR092W	1.39304	1.79999		YJR092W	1.33358	1.78971
YER170W	1.40419	1.66292		YER170W	1.33395	1.63611
YBL101C	1.32714	1.72025		YBL101C	1.33428	1.78049
YCR042C	1.32393	1.51435		YCR042C	1.33553	1.66565
YDL101C	1.38273	1.52397		YDL101C	1.33554	1.51704
YDR217C	1.38664	1.70926		YDR217C	1.33603	1.6486
YHL014C	1.37364	1.54482		YHL014C	1.33615	1.64014
YDR490C	1.35399	1.40037		YDR490C	1.33684	1.62146
YLR393W	1.2819	1.67427		YLR393W	1.33798	1.79088
YIL067C	1.3731	1.51094		YIL067C	1.33801	1.52045
YPL172C	1.36247	1.66272		YPL172C	1.33848	1.60773
YIL026C	1.33664	1.28347		YIL026C	1.33912	1.39963
YLL003W	1.35824	1.7313		YLL003W	1.33912	1.65005
YDR080W	1.36682	1.77846		YDR080W	1.33934	1.72003
YDR451C	1.42081	1.65864		YDR451C	1.33954	1.72679
YOL055C	1.37806	1.32507		YOL055C	1.34045	1.38321
YOL063C	1.33284	1.83851		YOL063C	1.34107	1.82874
YLL058W	1.3795	1.15495		YLL058W	1.34131	1.31209
YOL081W	1.31992	1.78203		YOL081W	1.34143	1.7635
YFR029W	1.30431	1.65858		YFR029W	1.34281	1.73919
YMR218C	1.32533	1.84707		YMR218C	1.34285	1.7857
YMR247C	1.34853	1.52304		YMR247C	1.34312	1.54502
YOR058C	1.34878	1.6701		YOR058C	1.34353	1.58201
YPR120C	1.38209	1.42442		YPR120C	1.34434	1.43021
YDR132C	1.36197	1.34767		YDR132C	1.34459	1.25132
YJR131W	1.30001	1.22056		YJR131W	1.34461	1.19184
YJL100W	1.38458	1.67213		YJL100W	1.34576	1.67035
YGL185C	1.3489	1.01313		YGL185C	1.34669	1.246
YAL001C	1.35867	1.3677		YAL001C	1.3472	1.26865
YLR001C	1.35697	1.38054		YLR001C	1.34725	1.35535
YPL007C	1.33568	1.66554		YPL007C	1.34957	1.65432
YJR122W	1.34302	1.6736		YJR122W	1.35076	1.65046
YNL275W	1.28821	1.76448		YNL275W	1.35088	1.77966
YCR054C	1.36509	1.42637		YCR054C	1.35123	1.44761
YGL227W	1.33274	1.64347		YGL227W	1.35136	1.57048
YDR141C	1.34266	1.85238		YDR141C	1.3522	1.88769
YPL006W	1.35813	1.76904		YPL006W	1.35241	1.81301
YHR165C	1.3203	1.80006		YHR165C	1.35269	1.83446
YDR332W	1.40515	1.49522		YDR332W	1.35443	1.2852
YJL162C	1.35811	1.55096		YJL162C	1.35474	1.43729
YFR031C	1.35905	1.73896		YFR031C	1.35496	1.7442
YER087W	1.38312	1.76809		YER087W	1.35517	1.69184
YNL297C	1.3567	1.9169		YNL297C	1.35534	1.88985
YML003W	1.35348	1.38874		YML003W	1.35612	1.14072
YGL124C	1.35419	1.53139		YGL124C	1.35694	1.4931
YBL014C	1.32915	1.58843		YBL014C	1.35708	1.54884
YPL148C	1.47817	1.55209		YPL148C	1.35742	1.52284
YNL020C	1.25434	1.66345		YNL020C	1.35997	1.68912
YOR018W	1.42228	1.74078		YOR018W	1.36014	1.65124
YPR032W	1.3727	1.48166		YPR032W	1.36092	1.5587
YMR271C	1.34907	1.20192		YMR271C	1.36387	1.33047
YBL084C	1.17586	1.82986		YBL084C	1.36399	1.86497
YMR294W	1.41142	1.7937		YMR294W	1.36491	1.73816
YGL163C	1.37913	0.694028		YGL163C	1.36524	1.19033
YOR188W	1.35688	1.73003		YOR188W	1.3653	1.80724
YGR156W	1.34437	1.64583		YGR156W	1.36629	1.57482
YCR065W	1.45228	1.73942		YCR065W	1.36825	1.64393
YLL032C	1.4725	1.72034		YLL032C	1.36907	1.7197
YOR363C	1.38949	1.61136		YOR363C	1.36908	1.65586
YOL025W	1.35041	1.45279		YOL025W	1.36926	1.54076
YGL216W	1.39749	1.74234		YGL216W	1.36943	1.67814
YGR032W	1.3868	1.57067		YGR032W	1.36964	1.65065
YIR005W	1.36787	1.44046		YIR005W	1.37159	1.31172
YDR307W	1.40189	1.41421		YDR307W	1.37237	1.43911
YBL023C	1.36746	1.47317		YBL023C	1.37255	1.48671
YLR266C	1.58463	1.0199		YLR266C	1.37286	1.26067
YDR173C	1.4362	1.82454		YDR173C	1.37293	1.77369
YMR052W	1.48018	1.62756		YMR052W	1.3741	1.61405
YJR110W	1.37296	1.6649		YJR110W	1.37455	1.57446
YJL005W	1.37311	1.82035		YJL005W	1.37479	1.90639
YKR045C	1.36793	1.88943		YKR045C	1.37561	1.90723
YMR117C	1.37464	1.68699		YMR117C	1.37599	1.74579
YDR338C	1.37723	1.65716		YDR338C	1.3767	1.61315
YDR097C	1.45385	0.928428		YDR097C	1.37744	1.14692
YGL113W	1.36589	1.70418		YGL113W	1.37777	1.63968
YDR160W	1.3724	1.72253		YDR160W	1.37861	1.7085
YFL024C	1.30815	1.71733		YFL024C	1.37864	1.76464
YMR273C	1.39614	1.5964		YMR273C	1.3791	1.63681
YIL095W	1.38932	1.62259		YIL095W	1.37941	1.62496
YJL127C	1.3762	1.77122		YJL127C	1.37979	1.68666
YKR010C	1.40212	1.71735		YKR010C	1.38064	1.69792
YPR055W	1.39389	1.91996		YPR055W	1.38125	1.87273
YDR301W	1.36468	1.86049		YDR301W	1.38151	1.8251
YLR189C	1.33826	1.71837		YLR189C	1.38167	1.76057
YEL061C	1.3654	1.78417		YEL061C	1.38169	1.79941
YLR305C	1.37664	1.85828		YLR305C	1.38232	1.80169
YGR140W	1.42295	1.52631		YGR140W	1.3831	1.4492
YBR007C	1.38317	1.57271		YBR007C	1.38458	1.47693
YHR129C	1.41934	1.72478		YHR129C	1.3846	1.72763
YNL054W	1.39322	1.72224		YNL054W	1.3848	1.74227
YOR017W	1.3268	1.78924		YOR017W	1.38576	1.79734
YLR386W	1.39944	1.70109		YLR386W	1.38591	1.71683
YLR039C	1.40523	1.80035		YLR039C	1.3863	1.79434
YJR136C	1.42496	1.65649		YJR136C	1.38689	1.69235
YAL011W	1.39167	1.73846		YAL011W	1.38784	1.75913
YMR041C	1.41038	1.39168		YMR041C	1.38927	1.54467
YLR102C	1.3563	1.68355		YLR102C	1.38941	1.66343
YNL230C	1.40435	1.65924		YNL230C	1.39006	1.69028
YDR207C	1.32695	1.4215		YDR207C	1.39034	1.62148
YPL268W	1.40877	1.70948		YPL268W	1.39132	1.68888
YNL083W	1.36866	1.86943		YNL083W	1.39158	1.76057
YGL254W	1.27966	0.87707		YGL254W	1.39164	1.38632
YKL194C	1.41585	1.5153		YKL194C	1.39176	1.54061
YOR073W	1.32464	1.74688		YOR073W	1.39216	1.74475
YJL099W	1.46492	1.73063		YJL099W	1.39217	1.71365
YOR308C	1.38471	1.54314		YOR308C	1.39399	1.50485
YKL072W	1.44104	1.44687		YKL072W	1.39499	1.15659
YGR258C	1.40799	1.48321		YGR258C	1.39574	1.66568
YKL022C	1.42351	1.86036		YKL022C	1.39602	1.72345
YML029W	1.3844	1.75622		YML029W	1.39632	1.77221
YLL002W	1.42386	1.48401		YLL002W	1.39828	1.34779
YKR004C	1.38444	1.43708		YKR004C	1.39894	1.39516
YCL027W	1.59198	1.60688		YCL027W	1.39945	1.30766
YGR263C	1.47052	1.16158		YGR263C	1.39959	1.08778
YLR419W	1.41132	1.844		YLR419W	1.39974	1.89495
YLR144C	1.43357	1.83366		YLR144C	1.401	1.80651
YOL100W	1.3984	1.40717		YOL100W	1.40144	1.51946
YPL242C	1.43747	1.7289		YPL242C	1.40199	1.77161
YCL004W	1.42959	1.66215		YCL004W	1.40269	1.64474
YIL029C	1.47148	1.03038		YIL029C	1.40293	1.14033
YGL204C	1.50503	1.69453		YGL204C	1.40311	1.53605
YJL197W	1.42875	1.80448		YJL197W	1.4039	1.86918
YDR239C	1.44193	1.78565		YDR239C	1.40533	1.64055
YGR004W	1.34636	1.33342		YGR004W	1.40591	1.55345
YNL116W	1.39853	1.88466		YNL116W	1.40608	1.62016
YJR052W	1.41261	1.65271		YJR052W	1.40622	1.67448
YPL155C	1.43098	1.87423		YPL155C	1.40755	1.87727
YDR489W	1.37731	1.5736		YDR489W	1.40831	1.64737
YNL214W	1.45594	1.67681		YNL214W	1.40842	1.59784
YOR172W	1.42272	1.87438		YOR172W	1.40915	1.8678
YJR055W	1.4707	1.43341		YJR055W	1.4092	1.3749
YDR541C	1.58661	1.29228		YDR541C	1.41003	0.874596
YCL044C	1.34921	1.87317		YCL044C	1.41138	1.85711
YPL152W	1.48112	1.58444		YPL152W	1.41149	1.54275
YGL083W	1.43228	1.6291		YGL083W	1.41233	1.57968
YML116W	1.48451	1.51576		YML116W	1.41318	1.41961
YKL124W	1.41285	1.49267		YKL124W	1.41336	1.56329
YHR079C	1.40687	1.664		YHR079C	1.4137	1.672
YJR087W	1.46061	1.76756		YJR087W	1.41437	1.72565
YBR001C	1.39288	1.03823		YBR001C	1.41575	1.19171
YHR118C	1.44109	1.74613		YHR118C	1.41607	1.79301
YLR210W	1.41851	1.80935		YLR210W	1.41676	1.75282
YNR075W	1.53336	1.39996		YNR075W	1.41677	1.19329
YMR144W	1.42065	1.38698		YMR144W	1.41697	1.52359
YIL147C	1.41576	1.44445		YIL147C	1.41727	1.55284
YER109C	1.38411	1.79777		YER109C	1.41757	1.72377
YMR304W	1.40313	1.56877		YMR304W	1.418	1.62945
YOR279C	1.37271	1.15656		YOR279C	1.41842	1.3426
YKL105C	1.44489	1.80808		YKL105C	1.42018	1.72027
YHR091C	1.45574	1.71556		YHR091C	1.42107	1.70913
YFR030W	1.43262	1.33453		YFR030W	1.42157	1.49238
YER040W	1.40244	1.93421		YER040W	1.42275	1.93243
YJL209W	1.40665	1.8599		YJL209W	1.42299	1.92435
YGL016W	1.48151	1.78916		YGL016W	1.42353	1.67655
YGR184C	1.45078	1.72975		YGR184C	1.42367	1.56735
YKR037C	1.40057	1.76787		YKR037C	1.42432	1.75602
YNL257C	1.37409	1.79077		YNL257C	1.42459	1.78464
YPR093C	1.42647	1.79199		YPR093C	1.42482	1.80291
YKR021W	1.4476	1.80647		YKR021W	1.42483	1.80199
YLR084C	1.46906	1.50776		YLR084C	1.42497	1.63865
YML068W	1.45078	1.65478		YML068W	1.42517	1.50148
YDR503C	1.40156	1.32363		YDR503C	1.42559	1.59055
YLR137W	1.44086	1.56915		YLR137W	1.42627	1.64068
YGL143C	1.39028	1.68601		YGL143C	1.4263	1.67291
YOR191W	1.43303	1.92574		YOR191W	1.42723	1.81096
YMR036C	1.39473	1.5476		YMR036C	1.42888	1.55464
YLR430W	1.42934	1.5453		YLR430W	1.42924	1.49039
YDR128W	1.47841	1.60662		YDR128W	1.42944	1.6828
YOR229W	1.39804	1.1567		YOR229W	1.43	1.31747
YLR362W	1.45746	1.69041		YLR362W	1.43043	1.65119
YMR013C	1.38242	1.69058		YMR013C	1.43071	1.72024
YJR054W	1.53267	1.06955		YJR054W	1.43118	0.751145
YNL139C	1.43432	1.79139		YNL139C	1.4312	1.8095
YMR098C	1.4507	1.84389		YMR098C	1.43186	1.75206
YGR126W	1.44434	1.69008		YGR126W	1.4319	1.76427
YEL025C	1.45805	1.68464		YEL025C	1.43221	1.6083
YGL176C	1.42882	0.927332		YGL176C	1.43308	0.856581
YPL161C	1.46634	1.54106		YPL161C	1.43381	1.58035
YHL040C	1.38067	1.4641		YHL040C	1.43388	1.48005
YHL047C	1.43593	1.54649		YHL047C	1.43423	1.483
YOR290C	1.43448	1.88219		YOR290C	1.43522	1.83871
YBR179C	1.45801	1.79001		YBR179C	1.43523	1.77368
YML076C	1.38764	1.73209		YML076C	1.43571	1.79681
YBR081C	1.47194	1.56066		YBR081C	1.43647	1.59957
YOR181W	1.38485	1.74258		YOR181W	1.43658	1.77781
YOL044W	1.43429	1.04289		YOL044W	1.43786	1.07427
YNL115C	1.48968	1.18389		YNL115C	1.43787	1.20605
YHR194W	1.44034	1.40993		YHR194W	1.43863	1.41742
YGL136C	1.45386	1.63335		YGL136C	1.43864	1.63032
YCR066W	1.45259	1.66628		YCR066W	1.43892	1.70647
YLR131C	1.40224	1.56057		YLR131C	1.44093	1.53687
YJL193W	1.47069	1.72261		YJL193W	1.44128	1.72985
YLR245C	1.41508	1.886		YLR245C	1.44142	1.90687
YLR011W	1.50688	1.06711		YLR011W	1.4416	1.03686
YJR012C	1.49444	1.6599		YJR012C	1.44266	1.67425
YPL219W	1.43265	1.64892		YPL219W	1.44306	1.7473
YOR321W	1.42852	1.10978		YOR321W	1.44318	1.33156
YPL180W	1.45134	1.87078		YPL180W	1.44361	1.84985
YKR078W	1.45068	1.75958		YKR078W	1.44366	1.69896
YOR113W	1.41754	1.86462		YOR113W	1.44387	1.82846
YLR426W	1.48722	1.71765		YLR426W	1.4439	1.67542
YGR281W	1.43411	1.26539		YGR281W	1.44409	1.34328
YNL224C	1.44577	1.76134		YNL224C	1.44424	1.80068
YML061C	1.43434	1.46163		YML061C	1.44473	1.4455
YMR253C	1.42989	1.44524		YMR253C	1.44479	1.4738
YPR104C	1.45072	1.56419		YPR104C	1.44511	1.64631
YDR159W	1.44683	1.75701		YDR159W	1.44651	1.72821
YAL017W	1.42895	1.78337		YAL017W	1.44786	1.72194
YHR034C	1.39142	1.39478		YHR034C	1.44864	1.5283
YIL151C	1.47729	1.62997		YIL151C	1.44882	1.53956
YPL115C	1.41292	1.81324		YPL115C	1.44895	1.71399
YMR019W	1.41727	1.78317		YMR019W	1.44904	1.7521
YHR150W	1.45584	1.71073		YHR150W	1.44991	1.70596
YGR168C	1.53131	1.53557		YGR168C	1.44994	1.42234
YAL051W	1.453	1.6866		YAL051W	1.45107	1.63635
YOR269W	1.42659	1.57798		YOR269W	1.45165	1.66512
YLR398C	1.46791	1.8017		YLR398C	1.45188	1.81956
YLR057W	1.48181	1.67551		YLR057W	1.45199	1.70711
YDR318W	1.45599	1.40451		YDR318W	1.45204	1.43617
YBR281C	1.50639	1.41055		YBR281C	1.4525	1.44765
YBR046C	1.46102	1.01606		YBR046C	1.45293	1.30294
YPR178W	1.47095	1.83884		YPR178W	1.45353	1.81646
YBR157C	1.44428	1.1336		YBR157C	1.45374	1.3663
YML020W	1.45367	1.85332		YML020W	1.4548	1.82816
YOR301W	1.4294	1.83341		YOR301W	1.45531	1.8704
YLR368W	1.50633	1.71066		YLR368W	1.45556	1.58697
YLR091W	1.4478	1.29104		YLR091W	1.45561	1.45124
YDR484W	1.48731	1.63752		YDR484W	1.45607	1.53963
YHR154W	1.4352	0.872357		YHR154W	1.4563	0.987711
YDL233W	1.38041	1.76904		YDL233W	1.45636	1.74986
YMR147W	1.43392	1.20957		YMR147W	1.45649	1.42408
YOR137C	1.44855	1.2074		YOR137C	1.45663	1.41953
YCR019W	1.421	1.41129		YCR019W	1.45665	1.4548
YHR061C	1.42623	1.82788		YHR061C	1.45693	1.74952
YJL090C	1.41402	1.59883		YJL090C	1.45705	1.48957
YBR152W	1.45615	1.79273		YBR152W	1.45748	1.77965
YMR278W	1.58063	1.84122		YMR278W	1.45835	1.7707
YNL225C	1.45593	1.76298		YNL225C	1.45956	1.77685
YMR240C	1.46395	1.71572		YMR240C	1.46016	1.76706
YBL031W	1.41416	1.59433		YBL031W	1.46053	1.5931
YLL015W	1.49447	1.3051		YLL015W	1.46091	1.32172
YDR205W	1.47722	1.86607		YDR205W	1.46124	1.8113
YDL240W	1.45077	1.7881		YDL240W	1.46141	1.75154
YMR185W	1.46236	1.27949		YMR185W	1.46178	1.22976
YGL208W	1.43137	1.53548		YGL208W	1.46214	1.68591
YCR075C	1.42883	1.53192		YCR075C	1.46245	1.60828
YLR360W	1.51007	1.74946		YLR360W	1.46262	1.73863
YGR179C	1.49828	1.9402		YGR179C	1.46266	1.81027
YDL146W	1.52169	1.3521		YDL146W	1.46279	1.40427
YGL233W	1.41194	1.85098		YGL233W	1.46349	1.7842
YOR076C	1.44579	1.85873		YOR076C	1.46357	1.74709
YFR008W	1.4499	1.60126		YFR008W	1.46424	1.486
YOR353C	1.47643	1.7422		YOR353C	1.4646	1.67552
YJL073W	1.41496	1.58758		YJL073W	1.46603	1.59701
YMR192W	1.55649	1.83914		YMR192W	1.46606	1.81842
YKR027W	1.55923	1.75484		YKR027W	1.46618	1.72294
YJL087C	1.45876	1.76825		YJL087C	1.46701	1.72233
YNL233W	1.4536	1.56235		YNL233W	1.46719	1.67611
YDL090C	1.51524	1.70733		YDL090C	1.46732	1.61488
YMR259C	1.47226	1.53029		YMR259C	1.46739	1.62894
YNR048W	1.4475	1.83979		YNR048W	1.468	1.88342
YKR029C	1.47135	1.88897		YKR029C	1.46813	1.85741
YNR011C	1.49242	1.55147		YNR011C	1.46818	1.50204
YOR064C	1.47965	1.74154		YOR064C	1.46843	1.82026
YKR064W	1.47298	1.90203		YKR064W	1.46887	1.8527
YOL003C	1.41426	0.929545		YOL003C	1.4701	1.2019
YGL201C	1.42882	1.69741		YGL201C	1.47022	1.75109
YGR150C	1.48074	1.84339		YGR150C	1.47039	1.74594
YGR056W	1.49156	1.77634		YGR056W	1.47088	1.71489
YML103C	1.45125	1.88334		YML103C	1.47104	1.87652
YML065W	1.45123	1.5791		YML065W	1.47221	1.57277
YHR102W	1.45263	1.80751		YHR102W	1.47377	1.75104
YBR176W	1.49494	1.4516		YBR176W	1.47388	1.56619
YIR009W	1.55831	1.86797		YIR009W	1.47481	1.89407
YMR284W	1.47533	1.51521		YMR284W	1.47543	1.37554
YER075C	1.52051	1.7898		YER075C	1.47597	1.77112
YOL137W	1.50927	1.69294		YOL137W	1.47622	1.70186
YIL031W	1.46424	1.79724		YIL031W	1.47633	1.81315
YFR048W	1.49747	1.79919		YFR048W	1.47637	1.85833
YMR201C	1.48771	1.41996		YMR201C	1.47641	1.44334
YNL183C	1.37124	1.62752		YNL183C	1.47655	1.7018
YIL130W	1.37196	1.91127		YIL130W	1.47659	1.88004
YOR030W	1.46817	1.75338		YOR030W	1.47722	1.61716
YPL267W	1.46274	1.05026		YPL267W	1.47739	1.20201
YBR044C	1.47642	1.6807		YBR044C	1.47796	1.76832
YNL222W	1.5763	1.71244		YNL222W	1.4783	1.59291
YOR324C	1.4384	1.64359		YOR324C	1.47855	1.69103
YPL141C	1.52536	1.56142		YPL141C	1.47862	1.54179
YGL013C	1.49743	1.84067		YGL013C	1.47871	1.83945
YOR033C	1.44002	1.552		YOR033C	1.47876	1.65134
YMR283C	1.41305	1.5149		YMR283C	1.47972	1.61923
YLR260W	1.51469	1.46683		YLR260W	1.47998	1.3057
YMR172W	1.47595	1.54747		YMR172W	1.4801	1.57447
YNR009W	1.5401	1.88201		YNR009W	1.4804	1.85122
YER103W	1.46108	1.62165		YER103W	1.48117	1.62096
YER047C	1.37231	1.6586		YER047C	1.48223	1.65101
YMR155W	1.49047	1.62506		YMR155W	1.48239	1.60592
YOL053W	1.51661	1.19976		YOL053W	1.48363	1.2325
YOR193W	1.51413	1.72272		YOR193W	1.48374	1.68058
YGR091W	1.54819	1.59979		YGR091W	1.48409	1.58838
YBR037C	1.41828	1.72208		YBR037C	1.48522	1.79217
YNL133C	1.5697	1.47064		YNL133C	1.48586	1.43614
YKR096W	1.45848	1.71762		YKR096W	1.48611	1.6762
YHR198C	1.4348	1.72988		YHR198C	1.48623	1.83557
YPR162C	1.47549	1.81958		YPR162C	1.48636	1.78475
YOR266W	1.47016	1.62977		YOR266W	1.48646	1.65002
YIR018W	1.48818	1.70782		YIR018W	1.48666	1.78476
YJL201W	1.51198	1.71199		YJL201W	1.48677	1.73746
YMR299C	1.55932	1.62815		YMR299C	1.48734	1.70498
YGL045W	1.3421	1.10108		YGL045W	1.48775	1.31295
YGL194C	1.50769	1.82527		YGL194C	1.48847	1.8023
YPR168W	1.49707	1.87397		YPR168W	1.48929	1.90825
YOR211C	1.49344	1.83147		YOR211C	1.48954	1.86842
YAR018C	1.53185	1.35537		YAR018C	1.48956	1.40612
YDR532C	1.50526	1.68249		YDR532C	1.49089	1.69556
YDR422C	1.46634	1.7502		YDR422C	1.49091	1.74298
YKR090W	1.40377	1.60671		YKR090W	1.49138	1.66403
YLR319C	1.48086	1.83815		YLR319C	1.49138	1.82245
YJL094C	1.40827	1.66022		YJL094C	1.49187	1.58069
YDL028C	1.49995	1.70287		YDL028C	1.49239	1.6591
YOR109W	1.50513	1.87173		YOR109W	1.49245	1.74261
YHR036W	1.4655	1.76627		YHR036W	1.49304	1.80316
YPL255W	1.49231	1.73817		YPL255W	1.49334	1.78123
YBR008C	1.52423	1.55948		YBR008C	1.49406	1.5752
YGL060W	1.52698	1.67342		YGL060W	1.49509	1.58944
YKL219W	1.50205	1.31008		YKL219W	1.49536	1.1238
YNL164C	1.524	1.73795		YNL164C	1.49548	1.66637
YNL236W	1.51224	1.88146		YNL236W	1.49563	1.82803
YFR036W	1.54031	1.59748		YFR036W	1.49653	1.44033
YPL083C	1.51101	1.66839		YPL083C	1.49736	1.79293
YAL031C	1.47175	1.8561		YAL031C	1.49757	1.83044
YOR228C	1.45901	1.41579		YOR228C	1.49775	1.45739
YDR538W	1.47736	1.26126		YDR538W	1.49843	1.21868
YGR125W	1.43034	1.67068		YGR125W	1.49916	1.7331
YDL139C	1.48486	1.40486		YDL139C	1.49974	1.46236
YCR093W	1.4765	1.86768		YCR093W	1.50024	1.82603
YJL156C	1.45474	1.788		YJL156C	1.50091	1.81273
YKR061W	1.54121	1.36125		YKR061W	1.50144	1.5503
YBR094W	1.49265	1.17015		YBR094W	1.50198	1.25615
YIL139C	1.53397	1.19963		YIL139C	1.50202	1.25916
YBR065C	1.49108	1.43099		YBR065C	1.50258	1.60795
YGR170W	1.48508	1.78269		YGR170W	1.50309	1.68592
YBR272C	1.53122	1.80076		YBR272C	1.5037	1.75866
YDR470C	1.46621	1.80651		YDR470C	1.50449	1.74396
YMR274C	1.50572	1.41505		YMR274C	1.50469	1.43953
YLR278C	1.38622	1.88189		YLR278C	1.5047	1.8925
YLR271W	1.527	1.39502		YLR271W	1.50479	1.43901
YPL140C	1.49533	1.30235		YPL140C	1.50547	1.29226
YDR221W	1.49458	1.88636		YDR221W	1.50591	1.81501
YPL103C	1.50702	1.74682		YPL103C	1.50595	1.70531
YDL019C	1.48367	1.49109		YDL019C	1.50598	1.59762
YKR017C	1.49232	1.6582		YKR017C	1.50605	1.64533
YLR115W	1.48735	1.76001		YLR115W	1.50627	1.69166
YNR059W	1.52416	1.57188		YNR059W	1.50716	1.57219
YML081W	1.45356	1.76826		YML081W	1.50762	1.90496
YER128W	1.51556	1.6028		YER128W	1.50776	1.54773
YLR436C	1.51376	1.96546		YLR436C	1.50794	1.92766
YPR022C	1.50331	1.79438		YPR022C	1.50796	1.79329
YPR048W	1.52119	1.78377		YPR048W	1.50796	1.78681
YNL125C	1.47771	1.03308		YNL125C	1.50852	1.32701
YDR507C	1.51591	1.56522		YDR507C	1.50869	1.54929
YPR011C	1.52445	1.50773		YPR011C	1.50875	1.52931
YDR436W	1.46196	1.71825		YDR436W	1.50887	1.69104
YPL144W	1.47597	1.53413		YPL144W	1.5089	1.62109
YJR011C	1.4818	1.46234		YJR011C	1.50928	1.22389
YDR255C	1.50313	1.63915		YDR255C	1.51079	1.68247
YER058W	1.5126	1.51146		YER058W	1.51127	1.5038
YBR055C	1.52318	1.73283		YBR055C	1.51182	1.73735
YGR199W	1.53612	1.64139		YGR199W	1.51237	1.58449
YGR196C	1.54533	1.58417		YGR196C	1.51249	1.55268
YBL004W	1.46334	1.6996		YBL004W	1.51286	1.63031
YIL144W	1.53886	1.88491		YIL144W	1.51322	1.84582
YNL321W	1.47403	1.90215		YNL321W	1.51358	1.88478
YHL008C	1.56544	1.87259		YHL008C	1.51374	1.83241
YJL049W	1.51547	1.77023		YJL049W	1.51389	1.77655
YLR277C	1.5374	1.68629		YLR277C	1.51455	1.6786
YKL015W	1.52216	1.69319		YKL015W	1.51507	1.72728
YNL271C	1.4908	1.73013		YNL271C	1.51511	1.73867
YNL254C	1.58478	1.34754		YNL254C	1.51517	1.25143
YDL098C	1.5754	1.51684		YDL098C	1.51548	1.34162
YPR138C	1.25713	1.35612		YPR138C	1.51587	1.52966
YHR112C	1.55952	1.54128		YHR112C	1.51633	1.63918
YDL017W	1.4859	1.53008		YDL017W	1.51663	1.43156
YLR369W	1.56427	1.77489		YLR369W	1.51686	1.74544
YDR027C	1.51321	1.74902		YDR027C	1.51786	1.79689
YLR108C	1.49351	0.99329		YLR108C	1.51903	1.11266
YOR227W	1.45526	1.65197		YOR227W	1.51937	1.75763
YOL122C	1.74454	1.34734		YOL122C	1.51938	1.30394
YGL162W	1.61303	1.74336		YGL162W	1.51958	1.75363
YFL042C	1.54104	1.81758		YFL042C	1.51972	1.813
YER077C	1.59451	1.57592		YER077C	1.51983	1.56657
YER166W	1.50452	1.84774		YER166W	1.51999	1.81156
YLR238W	1.51162	1.65953		YLR238W	1.52048	1.68947
YPL116W	1.48631	1.79524		YPL116W	1.52091	1.72349
YPR155C	1.50397	1.54196		YPR155C	1.52119	1.64879
YOR386W	1.36032	1.13271		YOR386W	1.52206	1.43693
YBR195C	1.49283	1.66096		YBR195C	1.52265	1.69531
YDL230W	1.51452	1.46145		YDL230W	1.52344	1.51696
YOR066W	1.50573	1.45807		YOR066W	1.52364	1.54754
YLR392C	1.52475	1.70677		YLR392C	1.52375	1.65153
YOL066C	1.57064	1.56496		YOL066C	1.52463	1.56103
YER113C	1.49097	1.77676		YER113C	1.52612	1.81961
YHR151C	1.56394	1.54812		YHR151C	1.52623	1.58746
YDR478W	1.46563	1.62323		YDR478W	1.52627	1.68784
YBR059C	1.53231	1.72297		YBR059C	1.52672	1.78624
YNL299W	1.55429	1.37495		YNL299W	1.52683	1.57387
YIL048W	1.52047	1.84321		YIL048W	1.52685	1.83919
YNR010W	1.52681	1.56917		YNR010W	1.52782	1.6658
YEL005C	1.53493	1.37787		YEL005C	1.52783	1.36894
YNL326C	1.54817	1.70783		YNL326C	1.52841	1.65451
YOR250C	1.5592	1.86862		YOR250C	1.52885	1.93138
YOR223W	1.50395	1.70053		YOR223W	1.52953	1.65945
YER065C	1.49585	1.07968		YER065C	1.52965	1.30428
YHL028W	1.48704	1.61781		YHL028W	1.53025	1.70198
YOL048C	1.49108	1.2116		YOL048C	1.53067	1.23349
YLL001W	1.59649	1.82132		YLL001W	1.53073	1.78454
YML017W	1.54335	1.54687		YML017W	1.53087	1.5586
YML005W	1.53712	1.31802		YML005W	1.5311	1.40039
YJR040W	1.55852	1.75742		YJR040W	1.53143	1.75137
YIL061C	1.53836	1.58492		YIL061C	1.53159	1.63595
YJR090C	1.53289	1.83182		YJR090C	1.53185	1.80369
YBR291C	1.5136	1.65397		YBR291C	1.53189	1.62921
YBR132C	1.37696	0.995234		YBR132C	1.53194	1.5036
YLR326W	1.55926	1.07435		YLR326W	1.53213	1.13709
YDR130C	1.53292	1.86523		YDR130C	1.5326	1.81148
YFL007W	1.50311	1.4794		YFL007W	1.53278	1.48359
YLR191W	1.50676	1.75487		YLR191W	1.53314	1.80645
YLR212C	1.53454	1.4722		YLR212C	1.53347	1.53174
YEL043W	1.53091	1.91632		YEL043W	1.53348	1.8665
YGR015C	1.55828	1.58614		YGR015C	1.53429	1.49104
YJR021C	1.51579	1.81735		YJR021C	1.53468	1.8629
YDL035C	1.44273	1.65689		YDL035C	1.53548	1.70075
YCL039W	1.52133	1.53435		YCL039W	1.53602	1.57085
YOR124C	1.56442	1.80719		YOR124C	1.53603	1.7945
YJL187C	1.5398	1.29598		YJL187C	1.53621	1.19397
YNR008W	1.56184	1.68661		YNR008W	1.53625	1.73635
YFR021W	1.50559	1.59606		YFR021W	1.5365	1.5585
YLR265C	1.51258	1.08435		YLR265C	1.53726	1.35872
YKL101W	1.61148	1.13452		YKL101W	1.53738	1.18144
YPR018W	1.53619	1.50687		YPR018W	1.53741	1.55109
YPL176C	1.54006	1.79797		YPL176C	1.53743	1.71716
YDR439W	1.56281	1.65856		YDR439W	1.53748	1.53837
YHR002W	1.48391	1.57356		YHR002W	1.53787	1.61557
YBR185C	1.54437	1.70192		YBR185C	1.5379	1.64407
YNL088W	1.53312	1.34416		YNL088W	1.53835	1.16736
YPR185W	1.5047	1.54876		YPR185W	1.53847	1.63062
YGR117C	1.53508	1.81501		YGR117C	1.53857	1.73417
YML111W	1.5677	1.86311		YML111W	1.53863	1.87313
YGL079W	1.57674	1.81586		YGL079W	1.53866	1.73721
YMR282C	1.39561	1.61289		YMR282C	1.53906	1.63148
YJR010W	1.5439	1.29197		YJR010W	1.53952	1.23788
YDR138W	1.57096	1.69397		YDR138W	1.53989	1.76974
YGR177C	1.63409	1.67875		YGR177C	1.54023	1.65296
YDL119C	1.67004	1.63682		YDL119C	1.54024	1.74743
YKR095W	1.53855	1.81449		YKR095W	1.54062	1.73965
YDR464W	1.5405	1.70135		YDR464W	1.54116	1.72858
YLR082C	1.52112	1.74007		YLR082C	1.54125	1.69153
YPR122W	1.59501	1.81715		YPR122W	1.54169	1.72902
YKL034W	1.54968	1.71326		YKL034W	1.54172	1.77752
YOR201C	1.50759	1.87327		YOR201C	1.54217	1.89607
YJL006C	1.61034	1.6992		YJL006C	1.54257	1.62046
YBR006W	1.41045	1.00841		YBR006W	1.54268	0.848762
YMR227C	1.55118	1.72359		YMR227C	1.54269	1.72139
YKL011C	1.66843	1.77495		YKL011C	1.54295	1.7118
YGR194C	1.47742	1.38391		YGR194C	1.54326	1.6364
YOR075W	1.57558	1.65295		YOR075W	1.54336	1.69267
YLR417W	1.50546	0.588057		YLR417W	1.54344	0.999521
YJL042W	1.46355	1.64711		YJL042W	1.54357	1.71557
YDR200C	1.51148	1.89481		YDR200C	1.54535	1.83592
YGR141W	1.50201	1.36329		YGR141W	1.5454	1.4155
YJR132W	1.49386	1.28518		YJR132W	1.54638	1.16961
YDR326C	1.50493	1.56476		YDR326C	1.5464	1.52362
YGR065C	1.61562	1.60698		YGR065C	1.54646	1.54028
YCL047C	1.6713	1.41897		YCL047C	1.54647	1.35947
YOR071C	1.77966	1.29854		YOR071C	1.54709	1.14484
YFR020W	1.46558	1.66706		YFR020W	1.54849	1.62386
YOR347C	1.48949	1.32694		YOR347C	1.55	1.64822
YBL052C	1.55567	1.69786		YBL052C	1.5503	1.56824
YOL076W	1.6049	1.90581		YOL076W	1.55051	1.84515
YLR055C	1.49562	1.54119		YLR055C	1.55072	1.61829
YIL009C-A	1.60402	1.81979		YIL009C-A	1.55128	1.81913
YKR067W	1.50096	1.62829		YKR067W	1.55128	1.68039
YBR102C	1.55447	1.87335		YBR102C	1.55157	1.87237
YLR353W	1.51278	1.51283		YLR353W	1.55196	1.63333
YER008C	1.55113	1.87841		YER008C	1.55197	1.83561
YIL140W	1.6218	1.15705		YIL140W	1.55227	1.16621
YMR165C	1.55198	1.87328		YMR165C	1.55318	1.85407
YPL069C	1.55466	1.61993		YPL069C	1.55331	1.58666
YDR183W	1.56502	1.57916		YDR183W	1.5537	1.6266
YDR103W	1.55698	1.88585		YDR103W	1.55399	1.82903
YFL036W	1.54203	1.83989		YFL036W	1.55402	1.8421
YDR198C	1.56965	1.53272		YDR198C	1.55406	1.53415
YPR079W	1.5353	1.602		YPR079W	1.55425	1.67131
YLR069C	1.53523	1.80154		YLR069C	1.55444	1.78257
YIL112W	1.56613	1.83922		YIL112W	1.55461	1.80295
YOR352W	1.49978	1.29837		YOR352W	1.55505	1.48125
YJL039C	1.54415	1.73114		YJL039C	1.55686	1.69952
YMR035W	1.50824	1.0208		YMR035W	1.55721	1.07976
YOR233W	1.55867	1.76547		YOR233W	1.55756	1.62322
YDR479C	1.57103	1.803		YDR479C	1.55838	1.78077
YOR087W	1.57851	1.6685		YOR087W	1.55864	1.74863
YJL131C	1.48998	1.59879		YJL131C	1.55946	1.65318
YLR094C	1.77972	1.88703		YLR094C	1.55953	1.84667
YDR170C	1.53225	1.84658		YDR170C	1.55979	1.82484
YMR258C	1.58209	1.69305		YMR258C	1.55984	1.71291
YDR311W	1.55799	1.82455		YDR311W	1.55996	1.79745
YGL071W	1.54519	1.77642		YGL071W	1.56013	1.77864
YDR466W	1.56193	1.64471		YDR466W	1.56015	1.71729
YNL211C	1.62581	1.29606		YNL211C	1.56029	1.09609
YNL008C	1.55578	0.962768		YNL008C	1.56039	1.3392
YOL113W	1.59142	1.41891		YOL113W	1.56073	1.51071
YLR165C	1.56644	1.446		YLR165C	1.56158	1.52385
YDR440W	1.5706	1.44869		YDR440W	1.5623	1.3766
YCL063W	1.49338	1.65014		YCL063W	1.56239	1.64211
YOL148C	1.5537	1.91336		YOL148C	1.56241	1.8106
YGL036W	1.53267	1.56343		YGL036W	1.56325	1.66956
YDR310C	1.55583	1.76693		YDR310C	1.56345	1.74818
YDR122W	1.57182	1.77521		YDR122W	1.5638	1.77722
YFR043C	1.58516	1.63194		YFR043C	1.56421	1.58109
YGL151W	1.58186	1.80819		YGL151W	1.56435	1.72009
YAL026C	1.56594	1.84006		YAL026C	1.56533	1.76546
YOL065C	1.50387	1.67864		YOL065C	1.56537	1.67656
YPL107W	1.60253	1.67991		YPL107W	1.56542	1.77669
YOR337W	1.56568	1.55074		YOR337W	1.5658	1.56027
YBL079W	1.54745	1.92537		YBL079W	1.56643	1.81385
YFL049W	1.56729	1.67256		YFL049W	1.56649	1.63539
YNL068C	1.53031	1.56357		YNL068C	1.56655	1.49649
YGL134W	1.54929	1.75239		YGL134W	1.56705	1.75012
YBR161W	1.53541	1.55579		YBR161W	1.56717	1.69732
YDR093W	1.52802	1.70299		YDR093W	1.56741	1.73143
YDL030W	1.62565	1.60382		YDL030W	1.56755	1.58582
YAL032C	1.53412	1.63854		YAL032C	1.5679	1.71813
YDL056W	1.5782	1.84841		YDL056W	1.56798	1.79519
YPL125W	1.6027	1.71656		YPL125W	1.56808	1.63467
YIL152W	1.58522	1.73295		YIL152W	1.5692	1.75515
YNL191W	1.65073	1.48659		YNL191W	1.56956	1.3845
YLR207W	1.53829	1.61013		YLR207W	1.56968	1.65229
YKL095W	1.603	1.65798		YKL095W	1.57	1.70107
YJL029C	1.5826	1.82452		YJL029C	1.57022	1.80851
YLR440C	1.59713	1.81509		YLR440C	1.57043	1.79529
YGR239C	1.63102	1.22899		YGR239C	1.57068	1.24944
YKL189W	1.59067	1.66878		YKL189W	1.57111	1.6909
YLR337C	1.58306	1.79721		YLR337C	1.57119	1.79698
YGL243W	1.60355	1.727		YGL243W	1.57183	1.65935
YLR143W	1.58454	1.47268		YLR143W	1.57193	1.47811
YGR100W	1.60267	1.64839		YGR100W	1.57236	1.66898
YBR293W	1.63756	1.52554		YBR293W	1.57368	1.59303
YIR021W	1.61396	1.71127		YIR021W	1.57381	1.72841
YEL022W	1.57531	1.84709		YEL022W	1.57407	1.61179
YER022W	1.59545	1.782		YER022W	1.5743	1.77248
YOR346W	1.55656	1.51559		YOR346W	1.57478	1.60815
YLR324W	1.56646	1.56065		YLR324W	1.57491	1.56538
YKL045W	1.5918	1.08679		YKL045W	1.57508	1.18207
YKL173W	1.54463	1.80838		YKL173W	1.57518	1.76703
YER144C	1.58803	1.75864		YER144C	1.57542	1.64812
YER176W	1.60554	1.67222		YER176W	1.57603	1.7289
YDL018C	1.58736	1.41058		YDL018C	1.57668	1.57483
YDL091C	1.57378	1.47374		YDL091C	1.57686	1.63673
YNL260C	1.5915	1.53784		YNL260C	1.57757	1.60599
YKL165C	1.5607	1.60389		YKL165C	1.57786	1.65807
YOR112W	1.56313	1.75862		YOR112W	1.57905	1.82858
YDR473C	1.57613	1.74068		YDR473C	1.57936	1.74268
YBR229C	1.62562	1.51952		YBR229C	1.57973	1.62816
YAL041W	1.58977	1.97715		YAL041W	1.58004	1.94845
YDL215C	1.60786	1.724		YDL215C	1.58056	1.64094
YOR304W	1.57598	1.83549		YOR304W	1.58147	1.75787
YDL127W	1.70619	1.32685		YDL127W	1.58196	1.64491
YGR166W	1.63334	1.7522		YGR166W	1.58245	1.65694
YDR320C	1.56547	1.80093		YDR320C	1.58398	1.7953
YLR015W	1.54951	1.40414		YLR015W	1.5845	1.56869
YBR215W	1.55183	1.68739		YBR215W	1.5852	1.68106
YGR122W	1.49706	1.32622		YGR122W	1.58539	1.4395
YPR084W	1.5889	1.82436		YPR084W	1.58573	1.85229
YER167W	1.58774	1.71534		YER167W	1.58631	1.70906
YPL128C	1.587	1.89432		YPL128C	1.58649	1.85
YJL013C	1.61142	1.74569		YJL013C	1.58682	1.83018
YIL164C	1.56597	1.30972		YIL164C	1.58713	1.41023
YDL003W	1.60056	0.990494		YDL003W	1.58774	1.20958
YMR113W	1.64604	1.81481		YMR113W	1.58808	1.77497
YNL041C	1.64066	1.84239		YNL041C	1.58814	1.85165
YGR112W	1.60301	1.64878		YGR112W	1.58831	1.68079
YDR313C	1.56867	1.52807		YDR313C	1.58844	1.55801
YKL149C	1.58068	1.62208		YKL149C	1.58881	1.58564
YMR129W	1.57104	1.51918		YMR129W	1.58881	1.64056
YDL013W	1.62098	1.80757		YDL013W	1.58897	1.79552
YGL085W	1.63681	1.72812		YGL085W	1.58906	1.69396
YDR004W	1.65082	1.6535		YDR004W	1.58914	1.65074
YNL023C	1.56781	1.60101		YNL023C	1.58982	1.50581
YOL054W	1.65567	1.46594		YOL054W	1.59052	1.4267
YLR095C	1.64265	1.89387		YLR095C	1.59152	1.84088
YCR026C	1.57559	1.69618		YCR026C	1.5921	1.66673
YMR100W	1.61305	1.75313		YMR100W	1.59221	1.68706
YGL086W	1.57318	1.82014		YGL086W	1.59258	1.78281
YMR126C	1.56879	1.548		YMR126C	1.59282	1.62796
YFR005C	1.5802	1.50792		YFR005C	1.59313	1.59242
YOL112W	1.67545	1.76322		YOL112W	1.59354	1.74478
YMR003W	1.57946	1.48938		YMR003W	1.59358	1.5845
YDR448W	1.54737	1.95187		YDR448W	1.59467	1.90758
YBR114W	1.54028	1.11717		YBR114W	1.59477	1.32664
YKL218C	1.5727	0.682133		YKL218C	1.59495	0.960933
YKR091W	1.83263	1.24166		YKR091W	1.59558	1.2876
YFL023W	1.64877	1.64639		YFL023W	1.59563	1.48538
YMR020W	1.56565	1.51498		YMR020W	1.59574	1.59734
YLR274W	1.54734	1.2585		YLR274W	1.59609	1.47728
YER114C	1.54767	1.65239		YER114C	1.59631	1.62122
YPR019W	1.56511	1.67434		YPR019W	1.59714	1.7491
YJL110C	1.37869	1.7735		YJL110C	1.59778	1.83051
YBR073W	1.62282	1.55669		YBR073W	1.59818	1.58231
YHR038W	1.67316	1.65985		YHR038W	1.59831	1.62774
YGL195W	1.56175	1.91248		YGL195W	1.59839	1.90152
YGL053W	1.61194	1.13048		YGL053W	1.59861	1.48198
YLR071C	1.58955	1.90549		YLR071C	1.59907	1.88595
YPR071W	1.60197	1.33588		YPR071W	1.60011	1.32898
YDR142C	1.60877	1.6952		YDR142C	1.60025	1.72853
YNR045W	1.5812	1.82809		YNR045W	1.60027	1.78914
YIL068C	1.60816	1.631		YIL068C	1.60055	1.60517
YOL045W	1.57384	1.51661		YOL045W	1.60058	1.42205
YGL247W	1.61962	1.4515		YGL247W	1.60092	1.4084
YPL229W	1.67601	1.75781		YPL229W	1.60108	1.80618
YJL112W	1.61939	1.81981		YJL112W	1.60165	1.83538
YMR032W	1.62036	1.62275		YMR032W	1.60166	1.62814
YGL004C	1.55197	1.39562		YGL004C	1.60194	1.44665
YBR123C	1.58179	1.85967		YBR123C	1.60276	1.81059
YNL188W	1.5712	1.7611		YNL188W	1.6047	1.58689
YCR023C	1.67663	1.80496		YCR023C	1.60492	1.81325
YDR034C	1.63296	1.69802		YDR034C	1.60534	1.70565
YLR045C	1.62994	1.7392		YLR045C	1.60574	1.76179
YOR274W	1.62867	1.25464		YOR274W	1.60581	1.47455
YLL019C	1.54133	1.31177		YLL019C	1.60617	1.49417
YPL138C	1.62847	1.69345		YPL138C	1.60669	1.73851
YKR036C	1.55373	1.51943		YKR036C	1.60678	1.62204
YGL159W	1.59625	1.51784		YGL159W	1.60706	1.47014
YAL055W	1.58908	1.56757		YAL055W	1.60723	1.67396
YPL270W	1.63955	1.76166		YPL270W	1.60744	1.77032
YPR115W	1.60038	1.53123		YPR115W	1.60801	1.57045
YER149C	1.60564	1.53274		YER149C	1.60822	1.6216
YGR013W	1.59182	1.62536		YGR013W	1.61068	1.67599
YLR090W	1.63679	1.66362		YLR090W	1.6108	1.60617
YMR177W	1.54195	1.27359		YMR177W	1.61086	1.28873
YDL224C	1.61891	1.85735		YDL224C	1.6115	1.76934
YNL316C	1.68706	1.83185		YNL316C	1.61214	1.77953
YHR204W	1.62158	1.81495		YHR204W	1.61251	1.69524
YOL042W	1.66859	1.8077		YOL042W	1.61257	1.79703
YLR166C	1.63098	1.61282		YLR166C	1.6129	1.6788
YDR013W	1.62429	0.962917		YDR013W	1.61297	1.59377
YDL080C	1.63747	1.80151		YDL080C	1.61321	1.79514
YJL129C	1.57034	1.72207		YJL129C	1.61351	1.65586
YDL231C	1.5455	1.90719		YDL231C	1.61373	1.94195
YCR067C	1.62171	1.8732		YCR067C	1.61392	1.87174
YHL009C	1.56745	1.7727		YHL009C	1.6141	1.77202
YLR439W	1.59261	1.86948		YLR439W	1.61446	1.8944
YDR185C	1.60492	1.24282		YDR185C	1.61489	1.36246
YLR099C	1.75714	1.7174		YLR099C	1.61529	1.7127
YIL115C	1.5921	1.60149		YIL115C	1.61599	1.5179
YGL021W	1.67152	1.773		YGL021W	1.61605	1.7626
YDR288W	1.59116	1.48678		YDR288W	1.61605	1.56861
YJR130C	1.67078	1.63269		YJR130C	1.61615	1.65144
YKL026C	1.62599	1.29584		YKL026C	1.61662	1.33758
YML043C	1.61117	1.30276		YML043C	1.61679	1.29155
YKL112W	1.56007	1.81345		YKL112W	1.61776	1.74793
YML006C	1.58023	1.71983		YML006C	1.61785	1.66994
YPL122C	1.58553	1.61474		YPL122C	1.61888	1.65887
YLR363C	1.61886	1.72654		YLR363C	1.61974	1.71757
YPL075W	1.70941	1.55376		YPL075W	1.62046	1.4905
YMR134W	1.63981	1.10208		YMR134W	1.62081	1.27918
YKR079C	1.59459	1.52953		YKR079C	1.62194	1.59068
YBR276C	1.65897	1.8953		YBR276C	1.62214	1.85256
YCR028C	1.58126	1.60404		YCR028C	1.62252	1.5922
YKL106W	1.5765	1.71884		YKL106W	1.62262	1.66322
YCR076C	1.6384	1.67008		YCR076C	1.6235	1.69412
YER061C	1.5955	1.48033		YER061C	1.62356	1.56038
YHL029C	1.62154	1.97396		YHL029C	1.6236	1.98535
YHL026C	1.57793	1.41108		YHL026C	1.62392	1.49387
YNR074C	1.73563	1.50529		YNR074C	1.62413	1.38718
YOR359W	1.6466	1.92694		YOR359W	1.62451	1.90161
YAL027W	1.66339	1.72174		YAL027W	1.6246	1.67744
YNL261W	1.6612	1.63577		YNL261W	1.62521	1.6628
YPL162C	1.57188	1.54576		YPL162C	1.62624	1.61244
YFL029C	1.63838	1.66042		YFL029C	1.62624	1.72906
YPL213W	1.67542	1.77117		YPL213W	1.62656	1.74274
YDR113C	1.63176	1.64592		YDR113C	1.62691	1.7554
YPL065W	1.66151	1.68401		YPL065W	1.62733	1.58944
YIL119C	1.63429	0.950095		YIL119C	1.62867	1.23682
YOR054C	1.59169	1.86823		YOR054C	1.62983	1.85088
YOR097C	1.63541	1.70425		YOR097C	1.63018	1.77483
YBL061C	1.70936	1.87248		YBL061C	1.63025	1.77394
YHR149C	1.62795	1.39289		YHR149C	1.63085	1.50879
YDR061W	1.68123	1.73608		YDR061W	1.63096	1.73221
YGR222W	1.70128	1.42073		YGR222W	1.63112	1.55052
YKL061W	1.56599	1.47268		YKL061W	1.63147	1.3371
YDR275W	1.66232	0.987173		YDR275W	1.63321	1.34615
YPL095C	1.67724	1.30588		YPL095C	1.6335	1.5577
YOR037W	1.6616	1.79286		YOR037W	1.63398	1.71729
YKL139W	1.62507	1.91965		YKL139W	1.63399	1.85605
YIL059C	1.64214	1.38216		YIL059C	1.63419	1.51099
YIL084C	1.58648	1.8548		YIL084C	1.63433	1.75283
YIR015W	1.66221	1.64996		YIR015W	1.63508	1.56321
YPR198W	1.67828	1.43457		YPR198W	1.63601	1.44768
YOR319W	1.66602	1.44585		YOR319W	1.6363	1.47906
YLR450W	1.6366	1.628		YLR450W	1.63651	1.67379
YKL079W	1.65074	1.79308		YKL079W	1.63669	1.7861
YMR211W	1.65678	0.808009		YMR211W	1.63692	1.60116
YDL175C	1.70178	1.83215		YDL175C	1.63766	1.8051
YNL253W	1.68161	1.5647		YNL253W	1.63771	1.49099
YDR036C	1.61257	1.57476		YDR036C	1.63783	1.58022
YGR077C	1.60846	1.68517		YGR077C	1.63807	1.79723
YIL079C	1.68414	1.64722		YIL079C	1.63827	1.61727
YOR287C	1.69265	1.43141		YOR287C	1.6388	1.45639
YLR117C	1.61208	1.77288		YLR117C	1.63909	1.78042
YDR364C	1.64978	1.80843		YDR364C	1.64026	1.71634
YJR116W	1.69453	1.42065		YJR116W	1.64077	1.37494
YNL053W	1.68688	1.81846		YNL053W	1.64091	1.81275
YBR060C	1.65503	1.83155		YBR060C	1.641	1.79231
YIL049W	1.75289	1.65044		YIL049W	1.64121	1.69504
YDR335W	1.65559	1.67765		YDR335W	1.64136	1.58751
YKL018W	1.61997	1.93036		YKL018W	1.64159	1.94874
YDR358W	1.58183	1.64458		YDR358W	1.64167	1.75014
YKL042W	1.63246	1.6449		YKL042W	1.6419	1.58822
YKL125W	1.7898	1.82115		YKL125W	1.64227	1.82962
YER129W	1.63922	1.75882		YER129W	1.6424	1.65133
YOL116W	1.5627	0.987067		YOL116W	1.64248	1.44521
YBR074W	1.63974	1.69589		YBR074W	1.64266	1.66565
YNL298W	1.63433	1.69277		YNL298W	1.64277	1.7313
YFR034C	1.67846	1.88705		YFR034C	1.64298	1.91754
YGR002C	1.64443	1.88114		YGR002C	1.64303	1.88148
YMR097C	1.65916	1.74208		YMR097C	1.64384	1.70371
YAL029C	1.65575	1.75536		YAL029C	1.64393	1.76582
YLR006C	1.61906	1.67064		YLR006C	1.64447	1.63901
YIL131C	1.61221	1.76036		YIL131C	1.64466	1.79732
YOL004W	1.60501	1.93633		YOL004W	1.64513	1.83183
YLR336C	1.66304	1.40242		YLR336C	1.64571	1.42411
YML064C	1.62759	1.8406		YML064C	1.64634	1.74273
YLL021W	1.62452	1.74632		YLL021W	1.64645	1.73423
YMR109W	1.61389	1.79467		YMR109W	1.64679	1.75359
YBR038W	1.67615	1.75407		YBR038W	1.64746	1.73545
YLR088W	1.67937	1.86496		YLR088W	1.6481	1.83957
YJR141W	1.62152	1.74241		YJR141W	1.64815	1.76354
YNL258C	1.64967	1.77636		YNL258C	1.64838	1.72295
YNL272C	1.64406	1.77654		YNL272C	1.64846	1.73776
YLR357W	1.63005	1.89557		YLR357W	1.64856	1.85939
YLR036C	1.71815	1.41219		YLR036C	1.64873	1.36198
YOL006C	1.67126	1.68433		YOL006C	1.64892	1.67544
YMR313C	1.62164	1.7107		YMR313C	1.6491	1.72368
YCR030C	1.62633	1.74457		YCR030C	1.64911	1.77742
YOL096C	1.64387	1.68204		YOL096C	1.64912	1.7273
YPR040W	1.6469	1.88361		YPR040W	1.64927	1.87859
YOR060C	1.61588	1.86948		YOR060C	1.6494	1.8874
YLR310C	1.62219	1.76495		YLR310C	1.64975	1.79708
YPL132W	1.67329	1.79702		YPL132W	1.65017	1.8362
YHR111W	1.63368	1.76132		YHR111W	1.65152	1.81882
YIL046W	1.67173	1.59998		YIL046W	1.65185	1.66034
YMR193W	1.66086	1.74626		YMR193W	1.65225	1.74192
YDR247W	1.59519	1.08613		YDR247W	1.65315	1.16604
YJL072C	1.65395	1.78956		YJL072C	1.65351	1.69979
YJL203W	1.68545	1.82119		YJL203W	1.65421	1.79351
YMR302C	1.64236	1.96508		YMR302C	1.65451	1.87761
YDR096W	1.60528	1.1545		YDR096W	1.65474	1.32965
YIL149C	1.61261	1.81651		YIL149C	1.65484	1.76673
YDR090C	1.61497	1.63544		YDR090C	1.65581	1.65644
YGL164C	1.68907	1.74661		YGL164C	1.6559	1.84807
YML041C	1.70309	1.83513		YML041C	1.65666	1.84051
YOR245C	1.68638	1.66624		YOR245C	1.65669	1.62367
YJL098W	1.59787	1.50137		YJL098W	1.65693	1.49851
YJR100C	1.67345	1.54224		YJR100C	1.65757	1.50716
YNL317W	1.62521	1.83552		YNL317W	1.6578	1.81811
YOR179C	1.63621	1.38535		YOR179C	1.65795	1.52016
YPR056W	1.63603	1.40882		YPR056W	1.65808	1.61789
YLR397C	1.64397	1.63126		YLR397C	1.65841	1.64071
YOR238W	1.72472	1.62947		YOR238W	1.65872	1.51604
YGR101W	1.65406	1.76832		YGR101W	1.65873	1.72609
YJR006W	1.68576	1.64352		YJR006W	1.65882	1.54789
YMR250W	1.49464	1.48721		YMR250W	1.65884	1.59544
YDR319C	1.66069	1.64186		YDR319C	1.65899	1.62747
YER105C	1.65395	1.9185		YER105C	1.65955	1.82021
YOL071W	1.75522	1.77073		YOL071W	1.6596	1.69119
YKL014C	1.64671	1.75031		YKL014C	1.6602	1.66764
YDR195W	1.63181	1.51945		YDR195W	1.66051	1.56324
YDL106C	1.64756	1.83083		YDL106C	1.66075	1.87117
YDR244W	1.65529	1.82625		YDR244W	1.66096	1.85791
YIL108W	1.68472	1.81784		YIL108W	1.66139	1.8307
YHR086W	1.66333	1.81827		YHR086W	1.66157	1.76614
YGL059W	1.62703	1.0711		YGL059W	1.66219	1.14413
YDL025C	1.64991	1.41611		YDL025C	1.66324	1.51661
YJL093C	1.66276	1.71452		YJL093C	1.66326	1.77996
YKR052C	1.63387	1.8575		YKR052C	1.6636	1.79984
YDL054C	1.66473	1.41669		YDL054C	1.66376	1.46386
YOL094C	1.67318	1.83155		YOL094C	1.66381	1.81031
YGR246C	1.68846	1.49381		YGR246C	1.66397	1.57125
YGL145W	1.69867	1.78379		YGL145W	1.66426	1.69354
YLR226W	1.6864	1.77567		YLR226W	1.66462	1.72239
YBR022W	1.69389	1.61905		YBR022W	1.66515	1.54848
YIL009W	1.69155	1.42052		YIL009W	1.66545	1.3373
YOR226C	1.71221	1.74792		YOR226C	1.6656	1.80652
YOR354C	1.66815	1.83915		YOR354C	1.6657	1.79638
YPL096W	1.72694	1.65434		YPL096W	1.66658	1.57403
YLR215C	1.6687	1.41756		YLR215C	1.66705	1.53433
YEL007W	1.59169	1.81942		YEL007W	1.66739	1.77187
YER071C	1.76174	1.27443		YER071C	1.66757	0.899524
YNR033W	1.67749	1.70093		YNR033W	1.66774	1.73618
YPL265W	1.77006	1.80575		YPL265W	1.66786	1.81393
YBR023C	1.68556	1.74517		YBR023C	1.66799	1.67662
YMR070W	1.61057	1.8728		YMR070W	1.6682	1.8774
YPR057W	1.66365	1.80084		YPR057W	1.66905	1.79462
YMR140W	1.68267	1.76577		YMR140W	1.66929	1.80643
YKR051W	1.63933	1.61303		YKR051W	1.66974	1.6647
YGR058W	1.6517	1.84127		YGR058W	1.67007	1.82624
YDL133W	1.63417	1.8654		YDL133W	1.67055	1.78458
YDR370C	1.68122	1.768		YDR370C	1.67059	1.67715
YBR028C	1.69474	1.78236		YBR028C	1.67066	1.78177
YGR042W	1.6966	1.43566		YGR042W	1.67069	1.3998
YML046W	1.6857	1.81268		YML046W	1.67111	1.76748
YBR129C	1.66428	1.77539		YBR129C	1.67146	1.74927
YDL006W	1.66841	1.50906		YDL006W	1.67159	1.41331
YDR020C	1.67779	1.33494		YDR020C	1.67166	1.41129
YML082W	1.64141	1.65754		YML082W	1.67218	1.63684
YPL074W	1.62605	1.77524		YPL074W	1.67223	1.75176
YLR451W	1.666	1.82132		YLR451W	1.67369	1.77509
YGR227W	1.71312	1.8207		YGR227W	1.67396	1.75708
YOR110W	1.71	1.84368		YOR110W	1.67415	1.82053
YNL286W	1.73704	1.4802		YNL286W	1.67421	1.46721
YJL212C	1.74306	1.79385		YJL212C	1.67435	1.70405
YLR309C	1.69594	1.59978		YLR309C	1.67488	1.63671
YOR221C	1.75727	1.72116		YOR221C	1.6751	1.78079
YHR114W	1.67225	1.6011		YHR114W	1.67571	1.46924
YKL020C	1.66652	1.97307		YKL020C	1.67587	1.93395
YDL036C	1.69833	1.45435		YDL036C	1.67731	1.38074
YML119W	1.7704	1.49488		YML119W	1.67892	1.4479
YOR148C	1.75596	1.4842		YOR148C	1.67907	1.45093
YKR083C	1.69397	1.45697		YKR083C	1.67953	1.51791
YHR144C	1.70852	1.49293		YHR144C	1.67986	1.42878
YER116C	1.6783	1.83434		YER116C	1.68023	1.78504
YDR235W	1.67237	1.78507		YDR235W	1.68029	1.75987
YFL027C	1.7029	1.68873		YFL027C	1.68033	1.75064
YEL073C	1.76374	1.07292		YEL073C	1.68059	1.10365
YMR209C	1.64349	1.64926		YMR209C	1.68062	1.68782
YOL087C	1.64787	1.81126		YOL087C	1.68111	1.79589
YLR097C	1.6333	1.42616		YLR097C	1.68113	1.55309
YLR290C	1.67608	1.56914		YLR290C	1.68138	1.69157
YGL226W	1.785	1.75633		YGL226W	1.68172	1.66527
YER095W	1.70733	1.69065		YER095W	1.68195	1.6823
YDL170W	1.64294	1.53487		YDL170W	1.68202	1.60643
YCR011C	1.6326	1.68645		YCR011C	1.68246	1.63732
YER155C	1.73953	1.98627		YER155C	1.68251	1.95776
YAL056W	1.65407	1.83622		YAL056W	1.68278	1.80986
YNL073W	1.65915	1.90217		YNL073W	1.68315	1.90069
YOR154W	1.66149	1.68066		YOR154W	1.68329	1.68998
YBL067C	1.62363	1.44825		YBL067C	1.68372	1.50258
YGR223C	1.66742	1.53221		YGR223C	1.6839	1.62402
YJL091C	1.71542	1.81283		YJL091C	1.68418	1.73316
YOR118W	1.6948	1.64006		YOR118W	1.68431	1.6312
YKR099W	1.65373	1.32483		YKR099W	1.68501	1.31544
YLR443W	1.68948	1.68005		YLR443W	1.68507	1.66442
YIL102C-A	1.70624	1.70606		YIL102C-A	1.68587	1.74797
YOR069W	1.70421	1.83569		YOR069W	1.68644	1.77958
YOR155C	1.74134	1.50433		YOR155C	1.6872	1.59038
YLR182W	1.69663	1.80311		YLR182W	1.68735	1.78564
YOL082W	1.67108	1.72306		YOL082W	1.68842	1.67314
YOR116C	1.65941	1.67307		YOR116C	1.68878	1.73607
YPL100W	1.70514	1.70333		YPL100W	1.68902	1.7105
YLR427W	1.69087	1.74973		YLR427W	1.68902	1.69607
YIL117C	2.00631	1.42494		YIL117C	1.68933	1.05073
YDR258C	1.70542	1.77368		YDR258C	1.68941	1.71757
YJL139C	1.72226	1.61583		YJL139C	1.6895	1.59262
YNL267W	1.7062	1.9176		YNL267W	1.69039	1.90466
YLL051C	1.6479	1.80332		YLL051C	1.69081	1.78321
YML071C	1.71669	1.66995		YML071C	1.69094	1.72206
YKR003W	1.7392	1.60718		YKR003W	1.69124	1.58152
YOR231W	1.67267	1.78664		YOR231W	1.69167	1.74933
YER168C	1.6758	1.78475		YER168C	1.69184	1.76968
YPR124W	1.65251	1.47832		YPR124W	1.69193	1.65433
YML112W	1.73723	1.8128		YML112W	1.69258	1.74316
YER034W	1.66928	1.58137		YER034W	1.69348	1.67419
YKL075C	1.72355	1.66675		YKL075C	1.69402	1.54462
YML080W	1.70628	1.80093		YML080W	1.69404	1.6962
YGR092W	1.788	1.69836		YGR092W	1.69409	1.77225
YMR277W	1.77977	1.90909		YMR277W	1.69543	1.85901
YOR079C	1.71199	1.83983		YOR079C	1.69561	1.66282
YGL196W	1.70802	1.11545		YGL196W	1.69573	1.40705
YBR170C	1.70768	1.91093		YBR170C	1.69609	1.85033
YMR001C	1.71004	1.70615		YMR001C	1.69631	1.51918
YLR042C	1.84232	0.831237		YLR042C	1.69703	1.04226
YNL024C	1.78342	1.52316		YNL024C	1.6972	1.37949
YAR042W	1.73188	1.91313		YAR042W	1.69747	1.89404
YBR049C	1.69386	1.71984		YBR049C	1.69776	1.68425
YFL041W	1.6685	1.75318		YFL041W	1.69786	1.73144
YBR257W	1.70715	1.20963		YBR257W	1.69796	1.22666
YNL320W	1.73041	1.73799		YNL320W	1.6981	1.69181
YGL206C	1.70329	1.92399		YGL206C	1.69891	1.87544
YGR028W	1.6494	1.64861		YGR028W	1.69934	1.80201
YDR306C	1.70248	1.79968		YDR306C	1.69949	1.78785
YFL044C	1.68479	1.847		YFL044C	1.69975	1.88331
YER019W	1.74532	1.84576		YER019W	1.69976	1.83429
YDR533C	1.75497	0.64991		YDR533C	1.69976	1.06526
YPL051W	1.7481	1.68707		YPL051W	1.69981	1.65321
YBR202W	1.63333	1.55866		YBR202W	1.69993	1.59585
YGR161W-C	1.74308	1.13512		YGR161W-C	1.70005	1.2122
YPR109W	1.72842	1.70534		YPR109W	1.7002	1.6331
YGL114W	1.71791	1.68858		YGL114W	1.70057	1.70857
YMR234W	1.72012	1.6743		YMR234W	1.70059	1.68431
YNL122C	1.79182	1.57187		YNL122C	1.70079	1.60764
YLL028W	1.58644	1.28577		YLL028W	1.70125	1.46848
YPL038W	1.6761	1.89628		YPL038W	1.70152	1.88471
YLR223C	1.72746	1.57369		YLR223C	1.70175	1.56452
YIL023C	1.75644	1.84459		YIL023C	1.70242	1.80802
YNL313C	1.68055	1.72648		YNL313C	1.70265	1.69005
YER158C	1.5828	0.878948		YER158C	1.70279	1.41747
YPL196W	1.72901	1.62142		YPL196W	1.70322	1.68358
YGL116W	1.75403	1.54728		YGL116W	1.70332	1.60584
YDR389W	1.71507	1.77299		YDR389W	1.70347	1.7748
YIL153W	1.68552	1.89891		YIL153W	1.70382	1.9331
YMR059W	1.75138	1.53882		YMR059W	1.70384	1.65277
YMR028W	1.71104	1.71338		YMR028W	1.70416	1.71076
YGL153W	1.71825	1.54204		YGL153W	1.70444	1.58781
YPL254W	1.68802	1.61982		YPL254W	1.70472	1.68667
YLR105C	1.71658	1.61547		YLR105C	1.70491	1.60198
YER010C	1.74678	1.38041		YER010C	1.70536	1.37304
YKL069W	1.72945	1.90345		YKL069W	1.70556	1.78704
YER171W	1.69551	1.73693		YER171W	1.70573	1.75928
YOL060C	1.72489	1.7816		YOL060C	1.70595	1.75781
YIL114C	1.71157	0.866103		YIL114C	1.7063	0.965849
YLR253W	1.7101	1.85382		YLR253W	1.70656	1.83089
YML100W	1.49761	1.25066		YML100W	1.70677	1.6431
YCR094W	1.72695	1.67906		YCR094W	1.70705	1.68621
YOR219C	1.64835	1.83696		YOR219C	1.7076	1.80965
YOL028C	1.71777	1.78093		YOL028C	1.70774	1.78733
YMR115W	1.66846	1.76986		YMR115W	1.7081	1.71127
YGR237C	1.68762	1.703		YGR237C	1.70863	1.7195
YDR279W	1.67622	1.28596		YDR279W	1.70883	1.36685
YDR117C	1.70294	1.7038		YDR117C	1.70918	1.73374
YFR016C	1.7359	1.48892		YFR016C	1.7096	1.42951
YMR119W	1.71508	1.65598		YMR119W	1.70997	1.59829
YBR193C	1.7302	1.83777		YBR193C	1.71048	1.8153
YMR064W	1.69209	1.37318		YMR064W	1.71063	1.49442
YOR292C	1.65662	1.71848		YOR292C	1.71105	1.74769
YDR312W	1.71952	1.57087		YDR312W	1.71106	1.55712
YHR100C	1.72356	1.36462		YHR100C	1.71136	1.19279
YGL062W	1.72982	1.59995		YGL062W	1.71141	1.49653
YBR095C	1.70349	1.87884		YBR095C	1.71142	1.73539
YNL163C	1.72147	1.58629		YNL163C	1.71165	1.68957
YOR044W	1.72011	1.61105		YOR044W	1.71176	1.51824
YOL032W	1.73739	1.6494		YOL032W	1.7118	1.6729
YJL011C	1.72631	1.68771		YJL011C	1.71243	1.70823
YPL070W	1.76493	1.7786		YPL070W	1.71263	1.63797
YPL228W	1.70045	1.82269		YPL228W	1.71289	1.75313
YDR505C	1.70134	1.71251		YDR505C	1.71337	1.72934
YBR211C	1.66146	1.75747		YBR211C	1.7147	1.7632
YKR024C	1.71578	1.7408		YKR024C	1.71502	1.6469
YBR200W	1.71854	1.49424		YBR200W	1.71506	1.664
YPL055C	1.74002	1.81832		YPL055C	1.71518	1.85597
YAR007C	1.73242	1.66334		YAR007C	1.71523	1.72246
YFL009W	1.69662	1.93058		YFL009W	1.71529	1.90505
YDR248C	1.74238	1.29314		YDR248C	1.71593	1.34754
YGL125W	1.6481	1.59188		YGL125W	1.71603	1.79589
YJL155C	1.68284	1.58632		YJL155C	1.71624	1.4884
YBR197C	1.66363	1.63638		YBR197C	1.71675	1.66007
YGR138C	1.75407	1.19686		YGR138C	1.71741	1.24567
YJR003C	1.70446	1.72046		YJR003C	1.71749	1.59628
YIL014W	1.70259	1.67634		YIL014W	1.7178	1.56411
YJL020C	1.6968	1.77941		YJL020C	1.7181	1.84671
YHR078W	1.72251	1.63852		YHR078W	1.71823	1.62037
YMR130W	1.77725	1.67017		YMR130W	1.7183	1.6988
YBR230W-A	1.68874	1.49146		YBR230W-A	1.71907	1.38848
YJL164C	1.63903	1.60238		YJL164C	1.71933	1.7054
YBL105C	1.69986	1.84476		YBL105C	1.71937	1.80738
YHR090C	1.66973	1.79243		YHR090C	1.71973	1.83199
YBR053C	1.76797	1.44011		YBR053C	1.71984	1.52636
YPR025C	1.75162	1.6732		YPR025C	1.71985	1.6749
YBR165W	1.71996	1.80919		YBR165W	1.72002	1.79045
YPL224C	1.66517	1.77262		YPL224C	1.72065	1.70374
YOR098C	1.68554	1.80646		YOR098C	1.72068	1.80658
YML097C	1.76357	1.71028		YML097C	1.72103	1.67439
YMR233W	1.72667	1.71988		YMR233W	1.72159	1.66383
YKL006C-A	1.71658	1.80795		YKL006C-A	1.72165	1.78309
YER169W	1.66565	1.4441		YER169W	1.7219	1.50096
YIL070C	1.79184	1.87017		YIL070C	1.72217	1.86724
YLR049C	1.73711	1.19135		YLR049C	1.72224	1.24835
YKL148C	1.74459	1.35608		YKL148C	1.72273	1.57227
YDR011W	1.73301	1.47539		YDR011W	1.72305	1.54496
YDR135C	1.70585	1.68907		YDR135C	1.72314	1.7171
YFR013W	1.71214	1.83455		YFR013W	1.72343	1.75865
YOR130C	1.71818	1.45771		YOR130C	1.72372	1.4721
YER014W	1.64381	1.12746		YER014W	1.72431	1.50439
YMR042W	1.57728	1.17079		YMR042W	1.7248	1.37599
YOR288C	1.65575	1.2992		YOR288C	1.7258	1.53543
YEL063C	1.57531	1.85448		YEL063C	1.72725	1.82822
YBR153W	1.75266	1.60703		YBR153W	1.72749	1.45161
YER175C	1.70103	1.10414		YER175C	1.72755	1.40118
YOL067C	1.69504	1.99644		YOL067C	1.72806	1.97436
YDR031W	1.69395	1.24119		YDR031W	1.72858	1.3922
YCR027C	1.71156	1.80702		YCR027C	1.7286	1.70318
YML088W	1.75391	1.71838		YML088W	1.72864	1.6214
YLR405W	1.69045	1.71911		YLR405W	1.72905	1.82354
YLL038C	1.66379	1.92045		YLL038C	1.72918	1.93085
YBL085W	1.67347	1.8779		YBL085W	1.72932	1.74916
YMR102C	1.75502	1.685		YMR102C	1.72949	1.63278
YMR077C	1.77742	1.55729		YMR077C	1.72963	1.52713
YER163C	1.73988	1.93372		YER163C	1.72969	1.87884
YDR428C	1.82587	1.53782		YDR428C	1.72995	1.58793
YJR043C	1.72655	1.45226		YJR043C	1.73015	1.38506
YNL077W	1.6753	1.15102		YNL077W	1.73042	1.43074
YHR041C	1.71217	0.976306		YHR041C	1.73111	0.940885
YDR019C	1.6199	0.825306		YDR019C	1.73181	1.44737
YEL017W	1.62763	1.74029		YEL017W	1.7321	1.80044
YBR119W	1.72508	1.65634		YBR119W	1.73226	1.65273
YMR289W	1.83305	1.84251		YMR289W	1.73244	1.76866
YDR105C	1.75465	1.82443		YDR105C	1.73282	1.7758
YBR042C	1.77112	1.65852		YBR042C	1.73284	1.69567
YEL029C	1.7345	1.53641		YEL029C	1.73329	1.56666
YBL017C	1.70116	1.75236		YBL017C	1.73332	1.70017
YLR356W	1.75228	1.13097		YLR356W	1.7336	1.49237
YNL003C	1.75559	1.65513		YNL003C	1.73362	1.70089
YOR372C	1.68742	1.92638		YOR372C	1.73364	1.9148
YHR045W	1.7557	1.68926		YHR045W	1.73368	1.66257
YGL065C	1.72616	1.72344		YGL065C	1.73406	1.71872
YDL043C	1.68368	1.80936		YDL043C	1.73422	1.75469
YJR134C	1.7317	1.50826		YJR134C	1.73432	1.66869
YCL032W	1.7667	1.88862		YCL032W	1.73497	1.78442
YDR257C	1.71383	1.72487		YDR257C	1.73497	1.74079
YLR007W	1.77564	1.40628		YLR007W	1.73555	1.41859
YJR060W	1.60175	1.81092		YJR060W	1.73563	1.74568
YBR251W	1.73335	1.79106		YBR251W	1.73577	1.77608
YPR017C	1.70683	1.61094		YPR017C	1.73623	1.55497
YOR147W	1.69195	1.83005		YOR147W	1.73637	1.78413
YCR033W	1.68589	1.91882		YCR033W	1.73643	1.92485
YGR251W	1.7527	1.5415		YGR251W	1.7369	1.57702
YJL061W	1.71363	1.82466		YJL061W	1.73691	1.80224
YML035C	1.70093	1.6654		YML035C	1.73718	1.78374
YCL051W	1.67842	1.87616		YCL051W	1.7378	1.82188
YOR322C	1.71686	1.89385		YOR322C	1.73781	1.78907
YOR070C	1.7147	1.8178		YOR070C	1.73815	1.82132
YOR213C	1.73311	1.43383		YOR213C	1.73833	1.57039
YHR127W	1.69545	1.62556		YHR127W	1.73865	1.73019
YNL221C	1.76444	1.71888		YNL221C	1.73895	1.80398
YIL137C	1.7426	1.82717		YIL137C	1.73899	1.6931
YPR119W	1.73422	0.816147		YPR119W	1.73925	1.552
YDR088C	1.7793	1.62905		YDR088C	1.73948	1.62115
YOR185C	1.71427	1.09587		YOR185C	1.73964	1.02711
YNR034W	1.75526	1.70298		YNR034W	1.73995	1.6676
YDR026C	1.7783	1.72415		YDR026C	1.74014	1.81303
YGR036C	1.74733	1.65956		YGR036C	1.74031	1.65188
YPL202C	1.68268	1.78028		YPL202C	1.74055	1.78908
YMR285C	1.76232	1.74734		YMR285C	1.74078	1.70488
YGR277C	1.74201	1.84206		YGR277C	1.74083	1.7885
YIL005W	1.73318	1.73881		YIL005W	1.74094	1.68259
YOR143C	1.7174	1.56244		YOR143C	1.74099	1.63367
YLL031C	1.72464	1.50215		YLL031C	1.74144	1.59186
YLR455W	1.68386	1.7903		YLR455W	1.74158	1.78103
YHL048W	1.96886	1.06863		YHL048W	1.74184	0.750865
YBR201W	1.74949	1.3231		YBR201W	1.7424	1.41333
YKR011C	1.71608	1.49191		YKR011C	1.74294	1.55911
YDL116W	1.74569	1.87686		YDL116W	1.74325	1.81425
YIL161W	1.72839	1.54984		YIL161W	1.74341	1.59314
YMR089C	1.7427	1.90018		YMR089C	1.74462	1.85646
YPL195W	1.76097	1.83895		YPL195W	1.74462	1.77862
YAL022C	1.73534	1.72127		YAL022C	1.74502	1.78736
YJR124C	1.74518	1.58248		YJR124C	1.74553	1.63495
YIL004C	1.70571	1.44825		YIL004C	1.74602	1.64579
YPL089C	1.74342	1.34897		YPL089C	1.74606	1.39667
YBR043C	1.74108	1.87195		YBR043C	1.74623	1.89015
YPL139C	1.74453	1.5612		YPL139C	1.74633	1.61931
YNL076W	1.72228	1.7198		YNL076W	1.74642	1.72181
YBR024W	1.72408	1.26351		YBR024W	1.74643	1.37658
YGR206W	1.7391	1.19167		YGR206W	1.74674	1.25175
YOL008W	1.74051	1.55032		YOL008W	1.74693	1.6247
YKL130C	1.79752	1.78798		YKL130C	1.74713	1.90392
YHR059W	1.88357	1.9544		YHR059W	1.74783	1.83459
YMR086W	1.71426	1.76837		YMR086W	1.74807	1.80474
YNR026C	1.78029	1.86175		YNR026C	1.7483	1.75761
YBR120C	1.75872	1.73237		YBR120C	1.74853	1.77932
YIR003W	1.74352	1.78097		YIR003W	1.74867	1.7635
YNL094W	1.71686	1.67707		YNL094W	1.74895	1.73892
YDR146C	1.76236	1.7589		YDR146C	1.74895	1.80443
YKL059C	1.77518	1.85684		YKL059C	1.74934	1.79284
YLR188W	1.72288	1.64209		YLR188W	1.75046	1.67062
YGL237C	1.74406	1.83139		YGL237C	1.75057	1.85805
YBR056W-A	1.60714	1.09821		YBR056W-A	1.75077	1.18456
YKL049C	1.72907	1.71774		YKL049C	1.75086	1.73954
YGR014W	1.82062	1.89667		YGR014W	1.75157	1.8537
YLR459W	1.76972	1.8707		YLR459W	1.75182	1.79328
YGL130W	1.75081	1.78757		YGL130W	1.75201	1.83152
YIL106W	1.78924	1.75625		YIL106W	1.75267	1.79175
YIL098C	1.79366	1.67617		YIL098C	1.7528	1.72313
YPL188W	1.78474	1.41165		YPL188W	1.75285	1.55193
YLR033W	1.75576	1.63578		YLR033W	1.75308	1.64459
YNL161W	1.75522	1.89926		YNL161W	1.75309	1.83634
YDR208W	1.68246	2.01688		YDR208W	1.75355	1.98679
YKR058W	1.73587	1.39404		YKR058W	1.75385	1.61939
YOL018C	1.81502	1.77634		YOL018C	1.75386	1.65336
YPL250C	2.0708	1.34638		YPL250C	1.75465	1.41559
YHR077C	1.7334	1.55051		YHR077C	1.75475	1.58797
YPL084W	1.72107	1.77664		YPL084W	1.75495	1.68769
YDL008W	1.8116	1.82859		YDL008W	1.75502	1.80658
YOR376W-A	1.71039	1.47069		YOR376W-A	1.75518	1.63847
YBL022C	1.78192	1.9872		YBL022C	1.7558	1.91604
YIL096C	1.73213	1.14255		YIL096C	1.75698	1.00322
YKL146W	1.75248	1.87194		YKL146W	1.75715	1.86094
YBR271W	1.72326	1.53681		YBR271W	1.75717	1.57544
YDR458C	1.7557	1.80496		YDR458C	1.75756	1.70416
YML032C	1.74321	1.95196		YML032C	1.75858	1.92571
YGL091C	1.79488	1.85827		YGL091C	1.75923	1.8269
YER183C	1.78627	1.88763		YER183C	1.75998	1.79569
YOL102C	1.71483	1.4622		YOL102C	1.76056	1.56439
YML013W	1.78006	1.81817		YML013W	1.76093	1.79711
YMR301C	1.78393	1.49494		YMR301C	1.76126	1.4526
YLL048C	1.75358	1.64412		YLL048C	1.76197	1.66365
YDR392W	1.75004	1.75426		YDR392W	1.76225	1.77662
YGR079W	1.80092	1.72399		YGR079W	1.76276	1.68969
YGL027C	1.81505	1.49403		YGL027C	1.76281	1.37784
YIL122W	1.75102	1.12611		YIL122W	1.76283	1.1319
YGR097W	1.78308	1.62881		YGR097W	1.76332	1.62638
YCL055W	1.86599	1.84582		YCL055W	1.76454	1.79276
YGR113W	1.76225	1.8934		YGR113W	1.76474	1.88345
YGL108C	1.80726	1.81875		YGL108C	1.76509	1.91175
YER092W	1.89138	1.85391		YER092W	1.76529	1.87222
YCR037C	1.73026	1.63058		YCR037C	1.76561	1.69964
YNL027W	1.71822	1.87393		YNL027W	1.76577	1.80427
YCR073W-A	1.74946	1.8171		YCR073W-A	1.7658	1.82972
YHR161C	1.80528	1.70777		YHR161C	1.76641	1.59815
YIL038C	1.74627	1.71431		YIL038C	1.76651	1.68408
YML015C	1.80351	1.83957		YML015C	1.76653	1.8184
YIL125W	1.78548	1.62392		YIL125W	1.76744	1.65756
YHR076W	1.73249	1.75866		YHR076W	1.76767	1.78496
YLR275W	1.77343	1.63307		YLR275W	1.76778	1.56842
YDR524C	1.72817	1.8768		YDR524C	1.76801	1.85904
YNL200C	1.73594	1.28675		YNL200C	1.76811	1.50498
YHR103W	1.71829	1.78565		YHR103W	1.76883	1.78955
YIL093C	1.76267	1.94584		YIL093C	1.76955	1.92994
YGL117W	1.91564	1.33997		YGL117W	1.76972	1.5005
YOR320C	1.73461	1.61349		YOR320C	1.76987	1.60334
YNL026W	1.75355	1.75102		YNL026W	1.77026	1.80662
YPR199C	1.77957	1.36967		YPR199C	1.77041	1.26925
YAR028W	1.74242	1.36827		YAR028W	1.77057	1.46865
YGR093W	1.75967	1.50529		YGR093W	1.77073	1.4813
YGL095C	1.79051	1.81548		YGL095C	1.77101	1.77833
YNL103W	1.75728	1.96931		YNL103W	1.77129	1.92466
YHR029C	1.82703	1.1642		YHR029C	1.77155	1.24304
YPL034W	1.77624	1.71853		YPL034W	1.77173	1.67077
YOL073C	1.76329	1.90748		YOL073C	1.77225	1.86455
YBR066C	1.73295	0.755483		YBR066C	1.77257	1.25543
YOR092W	1.83089	1.79368		YOR092W	1.77287	1.8371
YDR260C	1.74154	1.62577		YDR260C	1.77294	1.61885
YGL129C	1.80166	1.81766		YGL129C	1.77304	1.76355
YOR028C	1.59631	1.13326		YOR028C	1.77308	1.23673
YOR305W	1.79675	1.89502		YOR305W	1.77315	1.84612
YGL039W	1.93409	1.15553		YGL039W	1.7734	1.08518
YGL092W	1.76013	1.86026		YGL092W	1.77344	1.85414
YDR435C	1.71472	0.848527		YDR435C	1.77544	1.14251
YKR095W-A	1.79214	1.446		YKR095W-A	1.77599	1.36341
YIL126W	1.74267	1.88785		YIL126W	1.77601	1.87962
YOL158C	1.6014	1.62041		YOL158C	1.77664	1.7276
YPR180W	1.72896	1.78949		YPR180W	1.77688	1.63506
YOR297C	1.71562	1.73196		YOR297C	1.77693	1.73911
YOL103W	1.77977	1.85866		YOL103W	1.7776	1.85013
YKL001C	1.79093	1.58113		YKL001C	1.77793	1.56035
YOR299W	1.73772	1.82293		YOR299W	1.77832	1.83591
YEL050C	1.76591	1.8842		YEL050C	1.7784	1.86941
YMR158W	1.79107	1.91547		YMR158W	1.77853	1.87101
YPR045C	1.79603	1.90937		YPR045C	1.77928	1.88538
YLR241W	1.78851	1.53913		YLR241W	1.77928	1.64481
YJL060W	1.87111	1.73272		YJL060W	1.78024	1.64477
YLR163C	1.77084	1.7773		YLR163C	1.78091	1.71367
YKR070W	1.82132	1.78486		YKR070W	1.78158	1.78193
YER186C	1.8032	1.78988		YER186C	1.78229	1.79726
YNL201C	1.78964	1.72787		YNL201C	1.78301	1.67741
YLL034C	1.79443	1.54937		YLL034C	1.78313	1.49707
YGR261C	1.76106	1.72208		YGR261C	1.78351	1.69707
YDR043C	1.70841	1.24399		YDR043C	1.78362	1.27329
YDR176W	1.77082	1.89779		YDR176W	1.78364	1.8794
YGR040W	1.81014	1.5699		YGR040W	1.78372	1.66874
YML053C	1.73851	1.48034		YML053C	1.78379	1.53792
YBR282W	1.81327	1.64382		YBR282W	1.78399	1.61312
YGR174C	1.77543	1.32541		YGR174C	1.78536	1.42052
YPL011C	1.78838	1.93163		YPL011C	1.78566	1.91055
YGR012W	1.74359	1.76527		YGR012W	1.78572	1.68888
YJL109C	1.76567	1.7531		YJL109C	1.78576	1.69988
YNL006W	1.75169	1.89485		YNL006W	1.78585	1.86805
YGL098W	1.82155	1.84558		YGL098W	1.78593	1.81654
YFL046W	1.83433	1.71415		YFL046W	1.78782	1.68714
YOR207C	1.78184	1.70188		YOR207C	1.78792	1.52099
YOL115W	1.75922	1.75519		YOL115W	1.78802	1.7349
YPL183C	1.75497	1.80569		YPL183C	1.78828	1.78433
YMR029C	1.77612	1.84792		YMR029C	1.78863	1.81021
YDR052C	1.72678	1.89454		YDR052C	1.78888	1.88181
YGR084C	1.82912	1.96158		YGR084C	1.78893	1.91376
YBR243C	1.77937	1.59512		YBR243C	1.78904	1.5902
YNL039W	1.76659	1.79287		YNL039W	1.78909	1.73315
YMR067C	1.81883	1.92818		YMR067C	1.78962	1.88556
YNR030W	1.80925	1.78215		YNR030W	1.79008	1.77209
YBR125C	1.81395	1.52701		YBR125C	1.79154	1.49235
YMR004W	1.81168	1.76076		YMR004W	1.7919	1.73374
YLR116W	1.77897	1.62903		YLR116W	1.79217	1.66264
YGR120C	1.77849	1.3772		YGR120C	1.79276	1.48924
YKL064W	1.78603	1.55668		YKL064W	1.79295	1.57941
YLR138W	1.76874	1.51937		YLR138W	1.79324	1.6414
YJR147W	1.74638	1.69688		YJR147W	1.79349	1.61565
YDR330W	1.80349	1.84881		YDR330W	1.79359	1.80125
YGL224C	1.82069	1.53437		YGL224C	1.79379	1.56904
YBL107C	1.88772	1.62919		YBL107C	1.79388	1.62043
YGL067W	1.8618	1.76959		YGL067W	1.79421	1.7448
YOR057W	1.83765	1.58039		YOR057W	1.79436	1.50338
YOR023C	1.79815	1.94378		YOR023C	1.79495	1.94116
YKL103C	1.75374	1.50177		YKL103C	1.79522	1.60302
YNL158W	1.77584	1.90139		YNL158W	1.7954	1.85712
YNL048W	1.82272	1.86533		YNL048W	1.79622	1.80367
YBR220C	1.77948	1.76477		YBR220C	1.79683	1.731
YIR006C	1.78021	2.02123		YIR006C	1.79703	1.9785
YDL178W	1.81471	1.71189		YDL178W	1.79762	1.62157
YLR005W	1.77	1.58857		YLR005W	1.79794	1.63706
YMR153W	1.80366	1.89234		YMR153W	1.79801	1.79327
YLR114C	1.80523	1.76894		YLR114C	1.79812	1.77465
YCR072C	1.79787	1.66878		YCR072C	1.79817	1.6643
YPL112C	1.78212	1.82238		YPL112C	1.7984	1.76939
YKL025C	1.78583	1.90822		YKL025C	1.79841	1.87293
YPL020C	1.76959	1.70111		YPL020C	1.79906	1.65222
YJL053W	1.81804	1.67294		YJL053W	1.79915	1.63278
YMR080C	1.81292	1.91916		YMR080C	1.79933	1.85147
YBL078C	1.76674	1.48972		YBL078C	1.79942	1.52132
YKL179C	1.79896	1.76638		YKL179C	1.79947	1.75793
YJL210W	1.75405	1.52583		YJL210W	1.7995	1.41705
YLR347C	1.74295	1.93295		YLR347C	1.79997	1.89852
YNR049C	1.76667	1.82565		YNR049C	1.80053	1.8334
YMR239C	1.78872	1.48656		YMR239C	1.80063	1.44006
YHR001W	1.84867	1.57209		YHR001W	1.80067	1.64415
YLR254C	1.7405	1.28918		YLR254C	1.80073	1.52521
YNL294C	1.83004	1.84912		YNL294C	1.8009	1.87811
YJR102C	1.84863	1.67097		YJR102C	1.80191	1.54472
YNL167C	1.73706	1.65387		YNL167C	1.80215	1.64009
YCR020W-B	1.80738	1.70665		YCR020W-B	1.80235	1.69131
YJL101C	1.82219	1.68965		YJL101C	1.80243	1.67982
YMR104C	1.83616	1.06984		YMR104C	1.8025	0.84355
YBR077C	1.87125	1.77898		YBR077C	1.80308	1.78975
YCL010C	1.75922	1.91172		YCL010C	1.80327	1.91786
YIL135C	1.79838	1.92608		YIL135C	1.80341	1.89118
YLR023C	1.85993	1.42588		YLR023C	1.80384	1.48502
YKR028W	1.80148	1.65296		YKR028W	1.80393	1.38577
YMR199W	1.89801	1.57814		YMR199W	1.80403	1.61963
YIR033W	1.85659	1.83326		YIR033W	1.80416	1.74193
YFR002W	1.78324	1.87342		YFR002W	1.80455	1.83527
YNL216W	1.75383	1.86533		YNL216W	1.80476	1.91226
YKL183W	1.75243	1.6943		YKL183W	1.80482	1.71047
YBR236C	1.79909	1.82646		YBR236C	1.80491	1.83209
YER115C	1.8252	1.08454		YER115C	1.80564	1.03944
YFL004W	1.77288	1.78408		YFL004W	1.80609	1.74393
YJR142W	1.84274	1.58528		YJR142W	1.80658	1.54973
YPL042C	1.78793	1.87314		YPL042C	1.80684	1.89965
YOR125C	1.80384	1.85557		YOR125C	1.80713	1.84669
YHR073W	1.79266	1.86519		YHR073W	1.80749	1.78883
YBR198C	1.76622	1.96101		YBR198C	1.80818	1.93186
YGR252W	1.7803	1.85236		YGR252W	1.8086	1.81059
YDR206W	1.79939	1.4035		YDR206W	1.80916	1.56911
YOR106W	1.81645	1.58524		YOR106W	1.80944	1.72983
YNL305C	1.84302	1.69914		YNL305C	1.80946	1.80481
YLL022C	1.7788	0.948786		YLL022C	1.81031	1.22538
YAR014C	1.79089	1.77912		YAR014C	1.81043	1.68187
YDR005C	1.79555	1.48605		YDR005C	1.81057	1.56937
YKL088W	1.78736	1.84454		YKL088W	1.81113	1.7541
YPL026C	1.85552	1.77147		YPL026C	1.81118	1.75564
YKL073W	1.75966	1.64833		YKL073W	1.81123	1.72189
YJR059W	1.76801	1.8521		YJR059W	1.81209	1.88413
YLR410W	1.76559	1.86522		YLR410W	1.81277	1.88572
YKL087C	1.8446	1.8511		YKL087C	1.813	1.81954
YGR243W	1.91914	0.951905		YGR243W	1.81327	1.13623
YDR237W	1.7959	1.7132		YDR237W	1.81351	1.79678
YLR050C	1.83022	0.859775		YLR050C	1.81352	1.25024
YHR004C	1.81849	1.66235		YHR004C	1.81371	1.64055
YJR042W	1.81988	1.8161		YJR042W	1.81379	1.74321
YDR462W	1.8768	1.97177		YDR462W	1.81423	1.92654
YOR307C	1.78626	1.5066		YOR307C	1.81429	1.55508
YHR085W	1.82311	1.60555		YHR085W	1.81446	1.54186
YIL105C	1.78878	1.84212		YIL105C	1.81487	1.76553
YNL181W	1.84289	1.37348		YNL181W	1.81535	1.44996
YGR257C	1.80578	1.89881		YGR257C	1.81561	1.86525
YJL048C	1.78463	1.62905		YJL048C	1.8157	1.63509
YKL166C	1.80763	1.71801		YKL166C	1.81616	1.75671
YNL206C	1.80683	1.64298		YNL206C	1.81629	1.68715
YGR143W	1.81484	1.46425		YGR143W	1.81745	1.48644
YMR270C	1.81772	1.86982		YMR270C	1.81751	1.8243
YDR143C	1.79044	1.84303		YDR143C	1.81821	1.83622
YGR255C	1.83116	1.42041		YGR255C	1.8183	1.58808
YGR276C	1.86138	1.57682		YGR276C	1.81837	1.63968
YKR087C	1.81858	1.71949		YKR087C	1.81858	1.65001
YJR005W	1.82322	1.71013		YJR005W	1.81883	1.7353
YPR161C	1.77907	1.62689		YPR161C	1.819	1.62937
YFR025C	1.78238	1.6998		YFR025C	1.81942	1.8011
YGL203C	1.8177	1.82003		YGL203C	1.81958	1.83409
YOL125W	1.81699	1.44186		YOL125W	1.81973	1.35687
YDR518W	1.74739	1.13148		YDR518W	1.81999	1.41207
YNR012W	1.75815	1.17347		YNR012W	1.82012	1.25172
YBL086C	1.79453	1.43384		YBL086C	1.82027	1.50606
YMR088C	1.82186	1.69986		YMR088C	1.8211	1.70045
YDR261C	1.89589	1.71028		YDR261C	1.82144	1.62873
YDR016C	1.83557	1.66227		YDR016C	1.82162	1.66733
YNL042W	1.7465	1.34236		YNL042W	1.82202	1.49334
YGR205W	1.70994	1.49816		YGR205W	1.82258	1.66014
YJR048W	2.01425	1.19894		YJR048W	1.82266	0.706579
YHR046C	1.7787	1.67837		YHR046C	1.8229	1.61216
YNR044W	2.00753	1.51069		YNR044W	1.82331	1.6731
YMR139W	1.80515	1.71397		YMR139W	1.82347	1.71228
YDL049C	1.818	0.859		YDL049C	1.8237	1.02065
YIL056W	1.80307	1.41884		YIL056W	1.824	1.62636
YER064C	1.92398	1.82052		YER064C	1.82449	1.82503
YER017C	1.81608	1.75313		YER017C	1.82485	1.74981
YMR037C	1.78651	1.77335		YMR037C	1.82515	1.73923
YER059W	1.75636	1.69143		YER059W	1.82521	1.77559
YGL084C	1.80609	1.81426		YGL084C	1.82531	1.8182
YOL057W	1.80404	1.63098		YOL057W	1.82531	1.67524
YML121W	1.8217	1.54141		YML121W	1.82549	1.64113
YJL082W	1.79413	1.66766		YJL082W	1.82565	1.66499
YGL050W	1.83618	1.73013		YGL050W	1.82579	1.65051
YBR041W	1.84994	1.70717		YBR041W	1.82669	1.59254
YPL259C	1.75826	1.86725		YPL259C	1.82692	1.80547
YML062C	1.86299	1.8365		YML062C	1.82725	1.82907
YDR186C	1.84142	1.8149		YDR186C	1.82773	1.80665
YBR058C	1.80625	1.80615		YBR058C	1.82779	1.69496
YGR163W	1.8451	1.74858		YGR163W	1.82787	1.71475
YNL323W	1.8265	1.70373		YNL323W	1.82797	1.72574
YGL005C	1.78332	1.3584		YGL005C	1.82803	1.56341
YDL202W	1.84434	1.84867		YDL202W	1.82879	1.82531
YPR147C	1.82277	1.64043		YPR147C	1.82884	1.55413
YOR086C	1.82369	1.8717		YOR086C	1.82884	1.81619
YKL116C	1.78941	1.65437		YKL116C	1.82911	1.59225
YDR410C	1.914	1.79758		YDR410C	1.82913	1.84688
YPL149W	1.75739	1.32605		YPL149W	1.82963	1.50374
YHR181W	1.8786	1.76062		YHR181W	1.83015	1.58915
YML025C	1.86653	1.88592		YML025C	1.8307	1.89984
YHR084W	1.84923	1.755		YHR084W	1.83077	1.74657
YAL008W	1.85075	1.43436		YAL008W	1.83089	1.57381
YGL186C	1.86613	1.77329		YGL186C	1.83094	1.83451
YJR056C	1.82196	1.71839		YJR056C	1.8312	1.80126
YGL155W	1.83038	1.76352		YGL155W	1.83127	1.77714
YEL056W	1.83259	1.8714		YEL056W	1.83169	1.85932
YDR006C	1.84246	1.9392		YDR006C	1.83175	1.94354
YLR034C	1.73771	1.53655		YLR034C	1.83203	1.66097
YNR055C	1.76335	1.10784		YNR055C	1.83203	0.853127
YDL132W	1.85444	1.79814		YDL132W	1.83256	1.86429
YEL006W	1.83067	1.76675		YEL006W	1.83271	1.80466
YJL208C	1.82909	1.7091		YJL208C	1.83342	1.64159
YPL157W	1.81697	1.45966		YPL157W	1.83367	1.48765
YDR229W	1.82962	1.86247		YDR229W	1.8342	1.78604
YCR036W	1.9002	1.84764		YCR036W	1.83428	1.79323
YDL217C	1.79085	1.69436		YDL217C	1.83432	1.71916
YNL243W	1.84572	1.95143		YNL243W	1.83615	1.9972
YJR126C	1.8651	1.87744		YJR126C	1.83684	1.78528
YNL176C	1.81913	1.80942		YNL176C	1.8382	1.85482
YBR115C	1.8645	1.81764		YBR115C	1.83827	1.81673
YGR198W	1.85671	1.98654		YGR198W	1.83861	1.91068
YDR017C	1.84556	1.74423		YDR017C	1.83893	1.72691
YPR127W	1.90383	1.48964		YPR127W	1.83907	1.43758
YKL068W	1.83074	1.87902		YKL068W	1.83948	1.79297
YLR312W-A	1.81084	1.84422		YLR312W-A	1.84026	1.86348
YBR017C	1.81245	1.82026		YBR017C	1.84028	1.7752
YHR006W	1.81119	1.85369		YHR006W	1.84067	1.90092
YOL051W	1.81667	1.81021		YOL051W	1.84226	1.6587
YER151C	1.85043	1.88189		YER151C	1.84265	1.89247
YDR266C	1.81194	1.83009		YDR266C	1.84266	1.7818
YGR090W	1.83098	1.13771		YGR090W	1.8428	1.05505
YLL036C	1.8089	1.76471		YLL036C	1.84323	1.71346
YNL118C	1.85044	1.85984		YNL118C	1.84391	1.79952
YOL056W	1.89619	1.7492		YOL056W	1.84493	1.68953
YER174C	1.71775	0.738658		YER174C	1.84503	1.21768
YMR047C	1.86425	2.01191		YMR047C	1.84528	1.94599
YDL140C	1.80466	1.715		YDL140C	1.84565	1.66626
YDL155W	1.81422	1.77737		YDL155W	1.84586	1.76126
YJL157C	1.96428	1.47256		YJL157C	1.84596	1.44907
YOR241W	1.84032	1.82289		YOR241W	1.84618	1.82837
YKL135C	1.85375	1.78081		YKL135C	1.84618	1.79626
YJL076W	1.83393	1.84895		YJL076W	1.84918	1.89086
YJR099W	1.85393	1.44493		YJR099W	1.8493	1.49768
YDR322W	1.83309	1.8595		YDR322W	1.84942	1.79166
YGL248W	1.86599	0.696518		YGL248W	1.84955	1.50643
YNL199C	1.87383	1.87924		YNL199C	1.8501	1.89509
YML075C	1.84833	1.7582		YML075C	1.85027	1.76403
YIL047C	1.83932	1.97802		YIL047C	1.85037	1.89957
YHL031C	1.83949	1.89217		YHL031C	1.85042	1.85802
YGL014W	1.78399	1.52627		YGL014W	1.85048	1.54615
YNL265C	1.8433	1.7251		YNL265C	1.85071	1.77579
YEL013W	1.76847	1.7287		YEL013W	1.85091	1.75382
YJL172W	1.77648	1.51669		YJL172W	1.85103	1.62132
YKL052C	1.87573	1.96226		YKL052C	1.85107	1.96869
YNL284C	1.83366	1.83359		YNL284C	1.85202	1.83881
YHR115C	1.78902	1.9286		YHR115C	1.85226	1.92449
YNR013C	1.82202	1.82239		YNR013C	1.85429	1.82697
YDR331W	1.81597	1.77155		YDR331W	1.85433	1.79514
YPL189C-A	1.89643	1.48037		YPL189C-A	1.85433	1.53035
YMR024W	1.84157	1.83276		YMR024W	1.85455	1.85524
YGR089W	1.88132	1.58304		YGR089W	1.85464	1.62983
YJL024C	1.84612	1.72145		YJL024C	1.85478	1.68366
YKL204W	1.83441	1.81391		YKL204W	1.85499	1.72328
YKR085C	1.87154	1.90449		YKR085C	1.85502	1.87213
YKR016W	1.79854	1.83653		YKR016W	1.85505	1.79204
YDL045C	1.87866	1.68932		YDL045C	1.85534	1.68339
YDR144C	1.85823	1.607		YDR144C	1.85554	1.59386
YPL170W	1.9794	1.39024		YPL170W	1.85565	1.3244
YJL154C	1.82736	1.85975		YJL154C	1.85634	1.86876
YGR165W	1.87199	1.84727		YGR165W	1.85713	1.81594
YGR029W	1.88731	1.68182		YGR029W	1.85716	1.72476
YGL127C	1.81732	1.8908		YGL127C	1.85719	1.92197
YMR054W	1.82097	1.77221		YMR054W	1.85784	1.73349
YOR326W	1.89396	1.92311		YOR326W	1.85786	1.87078
YHR205W	1.83057	1.75839		YHR205W	1.85827	1.73519
YDR337W	1.86029	1.83238		YDR337W	1.85834	1.83239
YPR029C	1.84346	1.70703		YPR029C	1.85856	1.73528
YLR019W	1.84488	1.89288		YLR019W	1.85874	1.83067
YJL134W	1.86084	1.717		YJL134W	1.85882	1.75434
YMR300C	1.92803	1.72391		YMR300C	1.859	1.68865
YGR111W	1.84166	1.69495		YGR111W	1.85931	1.66279
YNL035C	1.84695	1.613		YNL035C	1.8596	1.51862
YMR261C	1.80166	1.81716		YMR261C	1.8598	1.85411
YIL103W	1.83973	1.66494		YIL103W	1.86012	1.59145
YDL171C	1.8614	1.66983		YDL171C	1.86023	1.65841
YDR434W	1.84264	1.69508		YDR434W	1.86078	1.63488
YBR167C	1.88943	1.84154		YBR167C	1.8609	1.86003
YAL040C	1.87579	1.81828		YAL040C	1.86095	1.80522
YMR044W	1.78686	1.85133		YMR044W	1.861	1.83023
YPR131C	1.82352	1.79892		YPR131C	1.86114	1.72746
YGR142W	1.82298	1.46593		YGR142W	1.86127	1.3066
YML127W	1.8235	1.96057		YML127W	1.8616	1.95901
[truncated: 1,609 more rows]

## Sheet: S6B-WT
Gene list	RPKM_Avg D10	RPKM_Avg WT	RPKM-Log2_Avg_D10	RPKM-Log2_Avg_WT
[truncated: 289 more rows]

[truncated: 3 more sheets: S6C-D10, S6D-WT, S6E-D10]
