# Supplementary material for: Aneuploidy as a cause of impaired chromatin silencing and mating-type specification in budding yeast
Source: eLife. 2017 Aug 25;6:e27991. doi: 10.7554/eLife.27991 (PMC5779231; doi:10.7554/eLife.27991)
Supplement: Figure 7—source data 1. [file elife-27991-fig7-data1.xlsx]

## Sheet: Chr X ORFs 
Strain background	Gene ID	% YFP positive cells	Desilencing Score relative to disome X	Gene name	Description
RLY9025	-	41.32	1	-	MOBY plasmid without ORF (pWM3)
RLY9023	YJL189W	25.8219	0.624924	RPL39	Ribosomal 60S subunit protein L39
RLY9023	YJL090C	24.4105	0.590768	DPB11	DNA replication initiation protein
RLY9023	YJL191W	23.9932	0.580667	RPS14B	Protein component of the small (40S) ribosomal subunit
RLY9023	YJL115W	23.225	0.562077	ASF1	Nucleosome assembly factor
RLY9023	YJL001W	22.9188	0.554667	PRE3	Beta 1 subunit of the 20S proteasome
RLY9023	YJL005W	22.5178	0.544961	CYR1	Adenylate cyclase
RLY9023	YJR042W	22.0537	0.53373	NUP85	Subunit of the Nup84p subcomplex of the nuclear pore complex (NPC)
RLY9023	YJL127C	21.9775	0.531885	SPT10	Histone H3 acetylase with a role in transcriptional regulation
RLY9023	YJL176C	21.9539	0.531314	SWI3	Subunit of the SWI/SNF chromatin remodeling complex
RLY9023	YJR140C	21.3641	0.51704	HIR3	Subunit of the HIR complex
RLY9023	YJR102C	21.3255	0.516107	VPS25	Component of the ESCRT-II complex
RLY9023	YJR077C	21.263	0.514594	MIR1	Mitochondrial phosphate carrier
RLY9023	YJL148W	21.1817	0.512627	RPA34	RNA polymerase I subunit A34.5
RLY9023	YJL092W	21.1625	0.512162	SRS2	DNA helicase and DNA-dependent ATPase
RLY9023	YJL047C	21.0793	0.510148	RTT101	Cullin subunit of a Roc1p-dependent E3 ubiquitin ligase complex
RLY9023	YJL058C	20.9977	0.508173	BIT61	Subunit of TORC2 membrane-associated complex
RLY9023	YJL068C	20.9944	0.508092		Esterase that can function as an S-formylglutathione hydrolase
RLY9023	YJL043W	20.9674	0.50744		Putative protein of unknown function
RLY9023	YJL077W-B	20.9537	0.507109		Putative protein of unknown function
RLY9023	YJL037W	20.6881	0.50068	IRC18	Protein involved in outer spore wall assembly
RLY9023	YJL011C	20.6815	0.500521	RPC17	RNA polymerase III subunit C17
RLY9023	YJL027C	20.6661	0.500147		Putative protein of unknown function
RLY9023	YJL056C	20.5134	0.496452	ZAP1	Zinc-regulated transcription factor
RLY9023	YJL041W	20.3657	0.492878	NSP1	FG-nucleoporin component of central core of the nuclear pore complex
RLY9023	YJL061W	20.3381	0.492209	NUP82	Linker nucleoporin component of the nuclear pore complex (NPC)
RLY9023	YJL082W	20.2027	0.488933	IML2	Protein required for clearance of inclusion bodies
RLY9023	YJL038C	20.0541	0.485337	LOH1	Protein involved in outer spore wall assembly
RLY9023	YJL014W	20.0477	0.485182	CCT3	Subunit of the cytosolic chaperonin Cct ring complex
RLY9023	YJL033W	20.0135	0.484353	HCA4	DEAD box RNA helicase
RLY9023	YJL118W	19.9873	0.483719		Protein of unknown function
RLY9023	YJL062W-A	19.8348	0.480029	COA3	Mitochondrial protein required for cytochrome c oxidase assembly
RLY9023	YJL062W	19.8298	0.479908	LAS21	Integral plasma membrane protein
RLY9023	YJL046W	19.65	0.475556	AIM22	Putative lipoate-protein ligase
RLY9023	YJL006C	19.611	0.474612	CTK2	Beta subunit of C-terminal domain kinase I (CTDK-I)
RLY9023	YJL080C	19.5851	0.473986	SCP160	Essential RNA-binding G protein effector of mating response pathway
RLY9023	YJL049W	19.5687	0.473589	CHM7	Yeast homolog of human CHMP7, localizes to the endoplasmic reticulum
RLY9023	YJL059W	19.5298	0.472649	YHC3	Protein required for the ATP-dependent transport of arginine
RLY9023	YJL035C	19.5022	0.471979	TAD2	Subunit of tRNA-specific adenosine-34 deaminase
RLY9023	YJL002C	19.4973	0.47186	OST1	Alpha subunit of the oligosaccharyltransferase complex of the ER lumen
RLY9023	YJL004C	19.4607	0.470975	SYS1	Integral membrane protein of the Golgi
RLY9023	YJL010C	19.2254	0.465282	NOP9	Essential subunit of U3-containing 90S preribosome
RLY9023	YJL012C	19.1698	0.463934	VTC4	Vacuolar membrane polyphosphate polymerase
RLY9023	YJL066C	19.0985	0.46221	MPM1	Mitochondrial intermembrane space protein of unknown function
RLY9023	YJL107C	19.0641	0.461376		Putative protein of unknown function
RLY9023	YJL031C	18.9358	0.458273	BET4	Alpha subunit of Type II geranylgeranyltransferase
RLY9023	YJL016W	18.9314	0.458166	TPH3	Putative protein of unknown function
RLY9023	YJL053W	18.8647	0.456551	PEP8	Vacuolar protein component of the retromer
RLY9023	YJL047C-A	18.7694	0.454245		Putative protein of unknown function
RLY9023	YJL024C	18.7658	0.454159	APS3	Small subunit of the clathrin-associated adaptor complex AP-3
RLY9023	YJL050W	18.6915	0.452359	MTR4	ATP-dependent 3'-5' RNA helicase of the DExD/H family
RLY9023	YJL026W	18.6673	0.451774	RNR2	Ribonucleotide-diphosphate reductase (RNR), small subunit
RLY9023	YJL133W	18.6553	0.451483	MRS3	Iron transporter, mediates Fe2+ transport across inner mito membrane
RLY9023	YJL072C	18.578	0.449614	PSF2	Subunit of the GINS complex (Sld5p, Psf1p, Psf2p, Psf3p)
RLY9023	YJL083W	18.5431	0.448768	TAX4	EH domain-containing protein
RLY9023	YJL103C	18.4506	0.44653	GSM1	Putative zinc cluster protein of unknown function
RLY9023	YJL105W	18.3829	0.444891	SET4	Protein of unknown function, contains a SET domain
RLY9023	YJL078C	18.3395	0.44384	PRY3	Cell wall-associated protein involved in export of acetylated sterols
RLY9023	YJL122W	18.2215	0.440985	ALB1	Shuttling pre-60S factor
RLY9023	YJL048C	18.0082	0.435823	UBX6	UBX (ubiquitin regulatory X) domain-containing protein
RLY9023	YJL098W	17.8855	0.432854	SAP185	Protein that forms a complex with the Sit4p protein phosphatase
RLY9023	YJL065C	17.8495	0.431983	DLS1	Subunit of ISW2/yCHRAC chromatin accessibility complex
RLY9023	YJL039C	17.7512	0.429604	NUP192	Essential subunit of inner ring of nuclear pore complex (NPC)
RLY9023	YJL087C	17.6562	0.427304	TRL1	tRNA ligase
RLY9023	YJL109C	17.5884	0.425664	UTP10	Nucleolar protein
RLY9023	YJL102W	17.5784	0.425421	MEF2	Mitochondrial elongation factor involved in translational elongation
RLY9023	YJL025W	17.5777	0.425404	RRN7	Component of the core factor (CF) rDNA transcription factor complex
RLY9023	YJL020C	17.5512	0.424762	BBC1	Protein possibly involved in assembly of actin patches
RLY9023	YJL073W	17.55	0.424734	JEM1	DnaJ-like chaperone required for nuclear membrane fusion during mating
RLY9023	YJL100W	17.4606	0.422569	LSB6	Type II phosphatidylinositol 4-kinase
RLY9023	YJL091C	17.3346	0.419521	GWT1	Protein involved in the inositol acylation of GlcN-PI
RLY9023	YJL077C	17.3133	0.419004	ICS3	Protein with a role in copper homeostasis
RLY9023	YJL070C	17.2815	0.418237		Putative metallo-dependent hydrolase superfamily protein
RLY9023	YJL054W	17.1559	0.415195	TIM54	Component of the mitochondrial TIM22 complex
RLY9023	YJL094C	17.0665	0.413033	KHA1	Putative K+/H+ antiporter
RLY9023	YJL081C	17.0524	0.412692	ARP4	Nuclear actin-related protein involved in chromatin remodeling
RLY9023	YJL055W	17.0203	0.411914		Putative protein of unknown function
RLY9023	YJL117W	16.9943	0.411286	PHO86	Endoplasmic reticulum (ER) resident protein
RLY9023	YJL112W	16.8702	0.408283	MDV1	Peripheral protein of cytosolic face of mitochondrial outer membrane
RLY9023	YJL110C	16.6881	0.403873	GZF3	GATA zinc finger protein
RLY9023	YJL121C	16.6469	0.402877	RPE1	D-ribulose-5-phosphate 3-epimerase
RLY9023	YJL071W	16.619	0.402203	ARG2	Acetylglutamate synthase (glutamate N-acetyltransferase)
RLY9023	YJL108C	16.4152	0.397269	PRM10	Pheromone-regulated protein
RLY9023	YJL069C	16.395	0.396781	UTP18	Small-subunit processome protein involved in pre-18S rRNA maturation
RLY9023	YJL084C	16.211	0.392328	ALY2	Alpha arrestin
RLY9023	YJL074C	16.1852	0.391705	SMC3	Subunit of the multiprotein cohesin complex
RLY9023	YJL096W	16.1258	0.390267	MRPL49	Mitochondrial ribosomal protein of the large subunit
RLY9023	YJL042W	16.0957	0.389538	MHP1	Microtubule-associated protein involved in microtubule organization
RLY9023	YJL063C	16.0197	0.387699	MRPL8	Mitochondrial ribosomal protein of the large subunit
RLY9023	YJL013C	15.6314	0.378302	MAD3	Subunit of spindle-assembly checkpoint complex
RLY9023	YJL123C	15.6279	0.378217	MTC1	Protein of unknown function that may interact with ribosomes
RLY9023	YJL186W	15.6227	0.37809	MNN5	Alpha-1,2-mannosyltransferase
RLY9023	YJL097W	15.4503	0.373917	PHS1	Essential 3-hydroxyacyl-CoA dehydratase of the ER membrane
RLY9023	YJL106W	15.4357	0.373565	IME2	Serine/threonine protein kinase involved in activation of meiosis
RLY9023	YJL088W	15.1084	0.365644	ARG3	Ornithine carbamoyltransferase
RLY9023	YJL163C	15.0699	0.364712		Putative protein of unknown function
RLY9023	YJL019W	15.0694	0.3647	MPS3	Nuclear envelope protein
RLY9023	YJL104W	14.964	0.362148	PAM16	Subunit of the import motor (PAM complex)
RLY9023	YJL111W	14.9577	0.361998	CCT7	Subunit of the cytosolic chaperonin Cct ring complex
RLY9023	YJR030C	14.8645	0.35974	RBH2	Putative protein of unknown function
RLY9023	YJR025C	14.7999	0.358178	BNA1	3-hydroxyanthranilic acid dioxygenase
RLY9023	YJL029C	14.7191	0.356223	VPS53	Component of the GARP (Golgi-associated retrograde protein) complex
RLY9023	YJL036W	14.6839	0.355369	SNX4	Sorting nexin
RLY9023	YJL023C	14.6359	0.354209	PET130	Protein required for respiratory growth
RLY9023	YJR022W	14.5205	0.351417	LSM8	Lsm (Like Sm) protein
RLY9023	YJR035W	14.4897	0.350671	RAD26	Protein involved in transcription-coupled nucleotide excision repair
RLY9023	YJR135C	14.3764	0.347929	MCM22	Outer kinetochore protein and component of the Ctf3 subcomplex
RLY9023	YJL197W	14.2962	0.345987	UBP12	Ubiquitin-specific protease
RLY9023	YJL178C	14.0945	0.341106	ATG27	Type I membrane protein involved in autophagy and the Cvt pathway
RLY9023	YJR036C	14.0857	0.340894	HUL4	Protein with similarity to hect domain E3 ubiquitin-protein ligases
RLY9023	YJL101C	14.0401	0.339789	GSH1	Gamma glutamylcysteine synthetase
RLY9023	YJR032W	13.7222	0.332096	CPR7	Peptidyl-prolyl cis-trans isomerase (cyclophilin)
RLY9023	YJL079C	13.6289	0.329838	PRY1	Sterol binding protein involved in the export of acetylated sterols
RLY9023	YJR034W	13.4758	0.326132	PET191	Protein required for assembly of cytochrome c oxidase
RLY9023	YJL190C	13.451	0.325533	RPS22A	Protein component of the small (40S) ribosomal subunit
RLY9023	YJL136C	13.4384	0.325228	RPS21B	Protein component of the small (40S) ribosomal subunit
RLY9023	YJL213W	13.4368	0.325188		Protein of unknown function that may interact with ribosomes
RLY9023	YJL170C	13.3062	0.322028	ASG7	Protein that regulates signaling from G protein beta subunit Ste4p
RLY9023	YJR144W	13.2051	0.319582	MGM101	Protein with a role in mitochondrial DNA recombinational repair
RLY9023	YJR024C	13.1468	0.31817	MDE1	5'-methylthioribulose-1-phosphate dehydratase
RLY9023	YJL124C	13.0934	0.316878	LSM1	Lsm (Like Sm) protein
RLY9023	YJL174W	13.0722	0.316366	KRE9	Glycoprotein involved in cell wall beta-glucan assembly
RLY9023	YJL060W	13.0527	0.315894	BNA3	Kynurenine aminotransferase
RLY9023	YJL126W	13.0252	0.315228	NIT2	Nit protein
RLY9023	YJL044C	12.9614	0.313683	GYP6	GTPase-activating protein (GAP) for yeast Rab family member Ypt6p
RLY9023	YJR105W	12.7641	0.308908	ADO1	Adenosine kinase
RLY9023	YJL177W	12.6778	0.306819	RPL17B	Ribosomal 60S subunit protein L17B
RLY9023	YJR147W	12.6491	0.306125	HMS2	Protein with similarity to heat shock transcription factors
RLY9023	YJR006W	12.6438	0.305996	POL31	Subunit of DNA polymerase delta (polymerase III)
RLY9023	YJR072C	12.54	0.303485	NPA3	Member of the conserved GPN-loop GTPase family
RLY9023	YJL218W	12.5099	0.302758		Putative acetyltransferase
RLY9023	YJR014W	12.4874	0.302211	TMA22	Protein of unknown function
RLY9023	YJL141C	12.4785	0.301997	YAK1	Serine-threonine protein kinase
RLY9023	YJL085W	12.4635	0.301634	EXO70	Subunit of the exocyst complex
RLY9023	YJL203W	12.4544	0.301413	PRP21	Subunit of the SF3a splicing factor complex
RLY9023	YJL184W	12.3986	0.300064	GON7	Component of the EKC/KEOPS protein complex
RLY9023	YJL138C	12.3155	0.298052	TIF2	Translation initiation factor eIF4A
RLY9023	YJL185C	12.3029	0.297746	ATG36	Pex3p interacting protein, required for pexophagy
RLY9023	YJL201W	12.2764	0.297106	ECM25	Non-essential protein of unknown function
RLY9023	YJL125C	12.1681	0.294485	GCD14	Subunit of tRNA (1-methyladenosine) methyltransferase
RLY9023	YJR134C	12.162	0.294336	SGM1	Protein of unknown function
RLY9023	YJL164C	12.1618	0.294333	TPK1	cAMP-dependent protein kinase catalytic subunit
RLY9023	YJL155C	12.066	0.292013	FBP26	Fructose-2,6-bisphosphatase, required for glucose metabolism
RLY9023	YJR101W	12.0344	0.291249	RSM26	Mitochondrial ribosomal protein of the small subunit
RLY9023	YJL179W	11.8767	0.287432	PFD1	Subunit of heterohexameric prefoldin
RLY9023	YJL145W	11.8737	0.28736	SFH5	Non-classical phosphatidylinositol transfer protein (PITP)
RLY9023	YJR092W	11.8635	0.287112	BUD4	Anillin-like protein involved in bud-site selection
RLY9023	YJR110W	11.8622	0.28708	YMR1	Phosphatidylinositol 3-phosphate (PI3P) phosphatase
RLY9023	YJR099W	11.8467	0.286707	YUH1	Ubiquitin C-terminal hydrolase
RLY9023	YJR053W	11.8023	0.285632	BFA1	Subunit of a two-component GTPase-activating protein, Bfa1p-Bub2p
RLY9023	YJR019C	11.7858	0.285232	TES1	Peroxisomal acyl-CoA thioesterase
RLY9023	YJR091C	11.7664	0.284762	JSN1	Member of the Puf family of RNA-binding proteins
RLY9023	YJR090C	11.7622	0.28466	GRR1	F-box protein component of an SCF ubiquitin-ligase complex
RLY9023	YJL151C	11.6947	0.283028	SNA3	Protein involved in efficient MVB sorting of proteins to the vacuole
RLY9023	YJR096W	11.6699	0.282428		Xylose and arabinose reductase
RLY9023	YJR143C	11.6474	0.281883	PMT4	Protein O-mannosyltransferase
RLY9023	YJL198W	11.5973	0.28067	PHO90	Low-affinity phosphate transporter
RLY9023	YJL099W	11.5102	0.278562	CHS6	Member of the ChAPs (Chs5p-Arf1p-binding proteins) family
RLY9023	YJL214W	11.4963	0.278226	HXT8	Protein of unknown function with similarity to hexose transporters
RLY9023	YJL166W	11.4933	0.278153	QCR8	Subunit 8 of ubiquinol cytochrome-c reductase (Complex III)
RLY9023	YJL076W	11.4883	0.278033	NET1	Core subunit of the RENT complex
RLY9023	YJR008W	11.4822	0.277886	MHO1	Protein of unknown function
RLY9023	YJR033C	11.3327	0.274267	RAV1	Subunit of RAVE complex (Rav1p, Rav2p, Skp1p)
RLY9023	YJL212C	11.3155	0.273849	OPT1	Proton-coupled oligopeptide transporter of the plasma membrane
RLY9023	YJL165C	11.288	0.273185	HAL5	Putative protein kinase
RLY9023	YJL217W	11.2592	0.272487	REE1	Cytoplasmic protein involved in the regulation of enolase (ENO1)
RLY9023	YJL209W	11.2413	0.272054	CBP1	Mitochondrial protein, regulator of COB mRNA stability and translation
RLY9023	YJR069C	11.2386	0.27199	HAM1	Nucleoside triphosphate pyrophosphohydrolase
RLY9023	YJL157C	11.2305	0.271794	FAR1	CDK inhibitor and nuclear anchor
RLY9023	YJR097W	11.2199	0.271537	JJJ3	Protein of unknown function
RLY9023	YJL146W	11.1925	0.270873	IDS2	Protein involved in modulation of Ime2p activity during meiosis
RLY9023	YJL187C	11.18	0.270571	SWE1	Protein kinase that regulates the G2/M transition
RLY9023	YJL181W	11.0269	0.266866	RBH1	Putative protein of unknown function
RLY9023	YJR060W	10.9982	0.266172	CBF1	Basic helix-loop-helix (bHLH) protein
RLY9023	YJR010C-A	10.9942	0.266074	SPC1	Subunit of the signal peptidase complex (SPC)
RLY9023	YJL134W	10.9825	0.265792	LCB3	Long-chain base-1-phosphate phosphatase
RLY9023	YJR100C	10.9296	0.264511	AIM25	Mitochondria protein of unknown function
RLY9023	YJL160C	10.9274	0.264459	PIR5	Putative protein of unknown function
RLY9023	YJR078W	10.8743	0.263174	BNA2	Tryptophan 2,3-dioxygenase or indoleamine 2,3-dioxygenase
RLY9023	YJR054W	10.8569	0.262752	KCH1	Potassium transporter that mediates K+ influx
RLY9023	YJR004C	10.8537	0.262674	SAG1	Alpha-agglutinin of alpha-cells
RLY9023	YJR154W	10.772	0.260697		Putative protein of unknown function
RLY9023	YJL149W	10.7098	0.259192	DAS1	Putative SCF ubiquitin ligase F-box protein
RLY9023	YJL131C	10.6687	0.258197	AIM23	Mitochondrial translation initiation factor 3 (IF3, mIF3)
RLY9023	YJR065C	10.6322	0.257313	ARP3	Essential component of the Arp2/3 complex
RLY9023	YJR013W	10.5824	0.256107	GPI14	Glycosylphosphatidylinositol-alpha 1,4 mannosyltransferase I
RLY9023	YJR011C	10.531	0.254865		Putative protein of unknown function
RLY9023	YJR001W	10.5096	0.254346	AVT1	Vacuolar transporter
RLY9023	YJL156C	10.5087	0.254324	SSY5	Serine protease of SPS plasma membrane amino acid sensor system
RLY9023	YJL139C	10.4801	0.253634	YUR1	Mannosyltransferase involved in protein N-glycosylation
RLY9023	YJR120W	10.4346	0.252531		Protein of unknown function
RLY9023	YJR142W	10.4258	0.252318		8-oxo-dGTP diphosphatase of the Nudix hydrolase family
RLY9023	YJR063W	10.417	0.252106	RPA12	RNA polymerase I subunit A12.2
RLY9023	YJR076C	10.4071	0.251866	CDC11	Component of the septin ring that is required for cytokinesis
RLY9023	YJR003C	10.3624	0.250785	MRX12	Protein that associates with mitochondrial ribosome
RLY9023	YJR094W-A	10.3555	0.250616	RPL43B	Ribosomal 60S subunit protein L43B
RLY9023	YJR016C	10.3504	0.250494	ILV3	Dihydroxyacid dehydratase
RLY9023	YJL180C	10.3003	0.249281	ATP12	Assembly factor for F1 sector of mitochondrial F1F0 ATP synthase
RLY9023	YJR079W	10.2736	0.248635		Putative protein of unknown function
RLY9023	YJR007W	10.2734	0.24863	SUI2	Alpha subunit of the translation initiation factor eIF2
RLY9023	YJR124C	10.221	0.247361		Putative protein of unknown function
RLY9023	YJR009C	10.2005	0.246865	TDH2	Glyceraldehyde-3-phosphate dehydrogenase (GAPDH), isozyme 2
RLY9023	YJR015W	10.1988	0.246824		Putative protein of unknown function
RLY9023	YJR043C	10.1453	0.24553	POL32	Third subunit of DNA polymerase delta
RLY9023	YJR116W	10.1103	0.244684	TDA4	Putative protein of unknown function
RLY9023	YJR108W	10.0891	0.244171	ABM1	Protein of unknown function
RLY9023	YJR115W	10.0887	0.24416		Putative protein of unknown function
RLY9023	YJR073C	10.0563	0.243377	OPI3	Methylene-fatty-acyl-phospholipid synthase
RLY9023	YJL196C	9.97699	0.241457	ELO1	Elongase I, medium-chain acyl elongase
RLY9023	YJR141W	9.97592	0.241431	IPA1	Essential protein of unknown function
RLY9023	YJR080C	9.9482	0.24076	AIM24	Protein with a role in determining mitochondrial architecture
RLY9023	YJL208C	9.94223	0.240615	NUC1	Major mitochondrial nuclease
RLY9023	YJR122W	9.89813	0.239548	IBA57	Protein involved in incorporating iron-sulfur clusters into proteins
RLY9023	YJL192C	9.82685	0.237823	SOP4	ER-membrane protein
RLY9023	YJR086W	9.82648	0.237814	STE18	G protein gamma subunit
RLY9023	YJL206C	9.82628	0.237809		Putative protein of unknown function
RLY9023	YJR057W	9.7354	0.23561	CDC8	Thymidylate and uridylate kinase
RLY9023	YJL158C	9.72545	0.235369	CIS3	Mannose-containing glycoprotein constituent of the cell wall
RLY9023	YJL153C	9.68158	0.234307	INO1	Inositol-3-phosphate synthase
RLY9023	YJL129C	9.67467	0.23414	TRK1	Component of the Trk1p-Trk2p potassium transport system
RLY9023	YJR094C	9.67056	0.234041	IME1	Master regulator of meiosis that is active only during meiotic events
RLY9023	YJL159W	9.65787	0.233733	HSP150	O-mannosylated heat shock protein
RLY9023	YJR148W	9.6059	0.232476	BAT2	Cytosolic branched-chain amino acid (BCAA) aminotransferase
RLY9023	YJL137C	9.5909	0.232113	GLG2	Glycogenin glucosyltransferase
RLY9023	YJR017C	9.49983	0.229909	ESS1	Peptidylprolyl-cis/trans-isomerase (PPIase)
RLY9023	YJL193W	9.45759	0.228887		Putative protein of unknown function
RLY9023	YJR133W	9.45328	0.228782	XPT1	Xanthine-guanine phosphoribosyl transferase
RLY9023	YJL128C	9.39362	0.227338	PBS2	MAP kinase kinase of the HOG signaling pathway
RLY9023	YJR074W	9.36206	0.226575	MOG1	Conserved nuclear protein that interacts with GTP-Gsp1p
RLY9023	YJL168C	9.31329	0.225394	SET2	Histone methyltransferase with a role in transcriptional elongation
RLY9023	YJR106W	9.25657	0.224022	ECM27	Protein involved in calcium homeostasis and exit from quiescence
RLY9023	YJL200C	9.25547	0.223995	ACO2	Putative mitochondrial aconitase isozyme
RLY9023	YJR045C	9.19782	0.2226	SSC1	Hsp70 family ATPase
RLY9023	YJL147C	9.18322	0.222246	MRX5	Protein that associates with mitochondrial ribosome
RLY9023	YJR052W	9.15185	0.221487	RAD7	Nucleotide excision repair (NER) protein
RLY9023	YJR125C	9.13036	0.220967	ENT3	Protein containing an N-terminal epsin-like domain
RLY9023	YJR098C	9.09313	0.220066		Putative protein of unknown function
RLY9023	YJR039W	9.05652	0.21918		Putative protein of unknown function
RLY9023	YJR075W	9.03319	0.218615	HOC1	Alpha-1,6-mannosyltransferase
RLY9023	YJR049C	9.02736	0.218474	UTR1	ATP-NADH kinase
RLY9023	YJR041C	8.9739	0.217181	URB2	Protein required for normal metabolism of the rRNA primary transcript
RLY9023	YJR084W	8.95264	0.216666		Protein that forms a complex with Thp3p
RLY9023	YJR118C	8.92468	0.215989	ILM1	Protein of unknown function
RLY9023	YJR062C	8.86912	0.214645	NTA1	Amidase
RLY9023	YJR137C	8.84981	0.214177	MET5	Sulfite reductase beta subunit
RLY9023	YJL144W	8.81375	0.213305		Cytoplasmic hydrophilin essential in desiccation-rehydration process
RLY9023	YJL154C	8.79983	0.212968	VPS35	Endosomal subunit of membrane-associated retromer complex
RLY9023	YJR082C	8.76417	0.212105	EAF6	Subunit of the NuA4 acetyltransferase complex
RLY9023	YJR103W	8.64508	0.209223	URA8	Minor CTP synthase isozyme (see also URA7)
RLY9023	YJR145C	8.63793	0.20905	RPS4A	Protein component of the small (40S) ribosomal subunit
RLY9023	YJL204C	8.62861	0.208824	RCY1	F-box protein involved in recycling endocytosed proteins
RLY9023	YJR085C	8.56044	0.207174		Protein of unknown function
RLY9023	YJR130C	8.49473	0.205584	STR2	Cystathionine gamma-synthase, converts cysteine into cystathionine
RLY9023	YJR139C	8.48569	0.205365	HOM6	Homoserine dehydrogenase (L-homoserine:NADP oxidoreductase)
RLY9023	YJL194W	8.48521	0.205354	CDC6	Essential ATP-binding protein required for DNA replication
RLY9023	YJL003W	8.43271	0.204083	COX16	Mitochondrial inner membrane protein
RLY9023	YJL183W	8.38828	0.203008	MNN11	Subunit of a Golgi mannosyltransferase complex
RLY9023	YJR058C	8.37236	0.202622	APS2	Small subunit of the clathrin-associated adaptor complex AP-2
RLY9023	YJR109C	8.27607	0.200292	CPA2	Large subunit of carbamoyl phosphate synthetase
RLY9023	YJR002W	8.27112	0.200172	MPP10	Component of the SSU processome and 90S preribosome
RLY9023	YJL143W	8.2632	0.199981	TIM17	Essential component of the TIM23 complex
RLY9023	YJR005W	8.19897	0.198426	APL1	Beta-adaptin
RLY9023	YJL167W	8.19803	0.198403	ERG20	Farnesyl pyrophosphate synthetase
RLY9023	YJL132W	8.18765	0.198152		Putative protein of unknown function
RLY9023	YJL171C	8.18383	0.19806	TOH1	GPI-anchored cell wall protein of unknown function
RLY9023	YJR127C	8.12394	0.19661	RSF2	Zinc-finger protein
RLY9023	YJR112W	8.09154	0.195826	NNF1	Essential component of the MIND kinetochore complex
RLY9023	YJL127C-B	8.06175	0.195105		Putative protein of unknown function
RLY9023	YJR129C	7.90467	0.191304	EFM3	S-adenosylmethionine-dependent methyltransferase
RLY9023	YJR093C	7.89683	0.191114	FIP1	Subunit of cleavage polyadenylation factor (CPF)
RLY9023	YJL034W	7.86815	0.19042	KAR2	ATPase involved in protein import into the ER
RLY9023	YJR113C	7.86581	0.190363	RSM7	Mitochondrial ribosomal protein of the small subunit
RLY9023	YJR107W	7.83034	0.189505	LIH1	Putative lipase
RLY9023	YJR152W	7.80013	0.188774	DAL5	Allantoate permease
RLY9023	YJR068W	7.66713	0.185555	RFC2	Subunit of heteropentameric Replication factor C (RF-C)
RLY9023	YJR055W	7.56466	0.183075	HIT1	Protein involved in C/D snoRNP assembly
RLY9023	YJR112W-A	7.53475	0.182351		Putative protein of unknown function
RLY9023	YJR050W	7.49033	0.181276	ISY1	Member of the NineTeen Complex (NTC)
RLY9023	YJR126C	7.46691	0.180709	VPS70	Protein of unknown function involved in vacuolar protein sorting
RLY9023	YJR064W	7.4459	0.180201	CCT5	Subunit of the cytosolic chaperonin Cct ring complex
RLY9023	YJR061W	7.37739	0.178543		Putative protein of unknown function
RLY9023	YJR051W	7.28832	0.176387	OSM1	Fumarate reductase, catalyzes the reduction of fumarate to succinate
RLY9023	YJR067C	7.0711	0.17113	YAE1	Protein that forms a complex with Lto1p and Rli1p
RLY9023	YJR104C	6.91894	0.167448	SOD1	Cytosolic copper-zinc superoxide dismutase
RLY9023	YJL052W	6.84102	0.165562	TDH1	Glyceraldehyde-3-phosphate dehydrogenase (GAPDH), isozyme 1
RLY9023	YJR153W	6.76554	0.163735	PGU1	Endo-polygalacturonase
RLY9023	YJR070C	6.75835	0.163561	LIA1	Deoxyhypusine hydroxylase
RLY9023	YJR119C	6.52804	0.157987	JHD2	JmjC domain family histone demethylase
RLY9023	YJL116C	6.41282	0.155199	NCA3	Protein involved in mitochondrion organization
RLY9023	YJR046W	6.37761	0.154347	TAH11	DNA replication licensing factor
RLY9023	YJR083C	6.34325	0.153515	ACF4	Protein of unknown function
RLY9023	YJR044C	6.33747	0.153375	VPS55	Late endosomal protein involved in late endosome to vacuole transport
RLY9023	YJL140W	6.26551	0.151634	RPB4	RNA polymerase II subunit B32
RLY9023	YJR117W	5.90235	0.142845	STE24	Highly conserved zinc metalloprotease
RLY9023	YJR123W	5.75954	0.139389	RPS5	Protein component of the small (40S) ribosomal subunit
RLY9023	YJR088C	5.69439	0.137812	EMC2	Member of conserved ER transmembrane complex
RLY9023	YJR048W	5.68503	0.137585	CYC1	Cytochrome c, isoform 1
RLY9023	YJL173C	5.65337	0.136819	RFA3	Subunit of heterotrimeric Replication Protein A (RPA)
RLY9023	YJR114W	5.5307	0.133851		Dubious open reading frame
RLY9023	YJR059W	5.48691	0.132791	PTK2	Serine/threonine protein kinase
RLY9023	YJR095W	5.46875	0.132351	SFC1	Mitochondrial succinate-fumarate transporter
RLY9023	YJL051W	4.82543	0.116782	IRC8	Bud tip localized protein of unknown function
RLY9023	YJR056C	4.80702	0.116336		Protein of unknown function
RLY9023	YJR150C	4.79949	0.116154	DAN1	Cell wall mannoprotein
RLY9023	YJL210W	0	0	PEX2	RING-finger peroxin and E3 ubiquitin ligase
