# Supplementary material for: Aneuploidy as a cause of impaired chromatin silencing and mating-type specification in budding yeast
Source: eLife. 2017 Aug 25;6:e27991. doi: 10.7554/eLife.27991 (PMC5779231; doi:10.7554/eLife.27991)
Supplement: Supplementary file 1. [file elife-27991-supp1.xlsx]

## Sheet: Table 1
Table 1. List of stable aneuploid karyotypes exhibiting defective silencing of the HMLlocus.
Name	Basal Ploidy	I	II	III	IV	V	VI	VII	VIII	IX	X	XI	XII	XIII	XIV	XV	XVI
RLY9071	2N	1	2	2	2	1	2	1	1	2	2	1	2	2	2	2	2
RLY9072	2N	2	2	3	2	2	2	2	2	2	2	2	2	3	2	2	2
RLY9073	2N	3	2	2	2	2	2	2	2	2	3	2	3	2	2	2	2
RLY9074	2N	2	2	2	2	2	2	2	2	3	2	2	2	2	2	2	3
RLY9075	1N	1	2	1	1	1	1	1	1	1	1	1	1	2	1	1	1
RLY9076	1N	1	1	3	1	1	1	1	1	1	2	1	1	1	1	1	1
RLY9077	1N	2	1	1	1	1	1	1	1	1	2	1	2	2	1	1	1
RLY9078	1N	1	1	2	1	2	1	1	1	1	1	1	2	1	1	1	1
RLY9079	1N	1	1	1	1	1	1	1	2	2	2	1	1	2	2	1	1
RLY9080	1N	1	1	1	1	1	1	1	1	2	1	1	1	2	1	2	1
RLY9081	1N	1	1	1	1	1	1	1	1	1	2	1	2	2	1	1	1
RLY9082	1N	1	1	2	1	1	1	1	1	1	1	1	2	1	1	1	1
RLY9083	1N	1	1	2	1	1	1	1	1	2	1	1	1	2	1	1	1
RLY9084	1N	1	2	1	1	1	1	1	1	1	1	1	2	1	1	1	1
RLY9085	1N	1	1	2	1	1	1	1	1	1	2	1	1	1	1	1	2
RLY9086	1N	1	1	2	1	1	1	1	2	1	1	1	1	1	1	1	2
RLY9087	1N	1	1	1	1	1	1	1	1	2	1	1	1	1	1	2	2
RLY9088	1N	2	2	1	1	1	1	1	1	1	2	1	2	1	1	1	1
RLY9089	1N	1	2	1	1	1	1	1	1	1	1	1	1	2	1	1	2
RLY9090	1N	1	1	2	1	1	1	1	1	1	1	2	2	1	1	1	1
RLY9091	1N	1	1	1	1	1	1	1	2	1	2	1	1	1	1	1	1
RLY9092	1N	2	1	1	2	1	1	1	1	1	1	1	1	1	1	1	1
RLY9093	1N	1	1	1	1	1	1	1	1	1	2	1	1	1	1	1	2
RLY9094	1N	1	1	2	1	1	1	1	1	1	2	1	1	1	1	1	1
