# Supplementary material for: Aneuploidy as a cause of impaired chromatin silencing and mating-type specification in budding yeast
Source: eLife. 2017 Aug 25;6:e27991. doi: 10.7554/eLife.27991 (PMC5779231; doi:10.7554/eLife.27991)
Supplement: Supplementary file 2. [file elife-27991-supp2.xlsx]

## Sheet: Table 2
Table 2. The number of genes plotted for each category in Figure 6A-B and Figure 6 – figure supplement 1 is listed.
H3K4me3	Category I: Genome-wide	Category II: Differentially down-regulated genes in disome X	Category III: Differentially up-regulated genes in disome X	Category IV: Subtelomeric (out of 220 genes located in 15kb region at both ends of chromosomes)
Number of genes with H3K4me3 score present in both disome X and WT	3502	24	24	18
Number of genes with H3K4me3 score present in disome X but not in WT	197	0	11	6
Number of genes with H3K4me3 score present in WT but not in disome X	289	3	6	3
Number of genes without H3K4me3 score but expressed in both disome X and WT	2196	65	121	75
Total	6184	92	162	102
H3K79me3	Category I: Genome-wide	Category II: Differentially down-regulated genes in disome X	Category III: Differentially up-regulated genes in disome X	Category IV: Subtelomeric (out of 220 genes located in 15kb region at both ends of chromosomes)
Number of genes with H3K79me3 score present in both disome X and WT	2249	6	6	6
Number of genes with H3K79me3 score present in disome X but not in WT	364	2	2	4
Number of genes with H3K79me3 score present in WT but not in disome X	255	4	1	1
Number of genes without H3K79me3 score but expressed in both disome X and WT	3316	80	153	91
Total	6184	92	162	102
