# Supplementary material for: Aneuploidy as a cause of impaired chromatin silencing and mating-type specification in budding yeast
Source: eLife. 2017 Aug 25;6:e27991. doi: 10.7554/eLife.27991 (PMC5779231; doi:10.7554/eLife.27991)
Supplement: Supplementary file 4. [file elife-27991-supp4.xlsx]

## Sheet: Table 4_Strains
Table 4. List of yeast strains used in this study, and not listed in table 1.
Name	Genotype	Experiment
RLY9017	MATα; ura3; his3; trp1; leu2; hml::PURA3-NLS-YFP	Fig 1B, 1D, 1E, Fig 1-S1A; Fig 2A, 2B, 2D; Fig 5-S1A,B,D; Fig 6A-D; Fig 6-S1, Fig 6-Sup table 1
RLY9018	MATa; ura3; his3; trp1; leu2; hml::PURA3-NLS-YFP	Fig 1-S1A
RLY9019	MATa/α; RLY9017 × RLY9017	Fig 1-S1A
RLY9020	MATa/a; (derived from RLY9019 by mating type switching)	Fig 1-S1A
RLY9021	MATa/a/α; RLY9020 × RLY9017	Fig 1-S1A
RLY9022	RLY9017; sir1∆::KanMX6	Fig 1B, 1D; Fig 2A, 2D,
RLY9023*	ura3; his3; trp1; leu2; hml::PURA3-NLS-YFP/hml::PURA3-NLS-YFP; + Chr III	Fig 2A
RLY9024*	ura3; his3; trp1; leu2; hml::PURA3-NLS-YFP/hml::PURA3-NLS-YFP/hml::PURA3-NLS-YFP; + Chr III; + Chr III (haploid strain with two extra copies of Chr III)	Fig 2A, 2B
RLY9025	MATa; ura3; his3; trp1; leu2; hml::PURA3-NLS-YFP; + Chr X (derived from RLY9076)	Fig 2A, 2C, 2D, Fig 6A-D, Fig 6-S1A-E, Fig 6-Sup table 1
RLY9026	MATa; ura3; his3; trp1; leu2; hml::PURA3-NLS-YFP; + Chr X (derived from RLY9077)	Fig 2A
RLY9027*	ura3; his3; trp1; leu2; hml::PURA3-NLS-YFP; + Chr I; + Chr XII; + Chr XIII (derived from RLY9077)	Fig 2A
RLY9028	RLY9017; Chr X::Pgal1-URAKL-Chr X	Fig 2C
RLY9029	RLY9017; Chr X::Pgal1-URAKL-CenX	Fig 2C
RLY9030	RLY9024; Chr X::Pgal1-URAKL-Chr X	Fig 2C
RLY9031	RLY9024; Chr X::Pgal1-URAKL-CenX	Fig 2C
RLY9032	RLY9025; sir1∆::KanMX6;	Fig 2D
RLY9033	MATa; ura3; his3; trp1; leu2;	Fig 3A-B
RLY9034	MATa; ura3; his3; trp1; leu2; sir1∆:: KanMX6	Fig 3A-B
RLY9035	MATa; ura3; his3; trp1; leu2; + Chr X	Fig 3A-B
RLY9036	RLY9017; SIR2::HA-HIS3	Fig 4A-D
RLY9037	RLY9022; SIR2::HA-HIS3	Fig 4A-D
RLY9038	RLY9026; SIR2::HA-HIS3	Fig 4A-D
RLY9039	RLY9017; SIR2::mTurq-KanMX6	Fig 5A-B, Fig 5-S1C
RLY9040	RLY9025; SIR2::mTurq-KanMX6; + Chr X	Fig 5A-B, Fig 5-S1C
RLY9041	RLY9033; hmlprox::lacO(256)-LEU2; HIS3::PURA3-LacI::GFP-KanMX; NUP60::mCherry-URA3	Fig 5C
RLY9042	RLY9035; hmlprox::lacO(256)-LEU2; HIS3::PURA3-LacI::GFP-KanMX; + Chr X; NUP60::mCherry-URA3; + Chr X	Fig 5C
RLY9043	RLY9017; + URA3 (Integration of NcoI digested pRS306, URA3)	Fig 7A-B
RLY9044	RLY9022; + URA3 (Integration of NcoI digested pRS306, URA3)	Fig 7A-B
RLY9045	RLY9025; + URA3 (Integration of NcoI digested pRS306, URA3)	Fig 7A-B
RLY9046	RLY9017; + ASF1 + DPB11 (Integration of NcoI digested pWM1 into URA3 locus)	Fig 7A-B
RLY9047	RLY9018; + RPL39 + RPS14B (Integration of HpaI digested pWM2 into DPB11 locus)	Fig 7A-B
RLY9048*	ura3; his3; trp1; leu2; hml::PURA3-NLS-YFP; + RPL39 + RPS14B + ASF1 + DPB11	Fig 7A-B
RLY9049	RLY9025; + Chr X; + Moby plasmid without ORF, CEN-ARS, URA3	Fig 7-Sup table 1
RLY9050	RLY9017; + PRE3 (YJL001W, MOBY-ORF, CEN-ARS, URA3)	Fig 7-Sup table 1
RLY9051	RLY9017; + CYR1 (YJL005W, MOBY-ORF, CEN-ARS, URA3)	Fig 7-Sup table 1
RLY9052	RLY9017; + RTT101 (YJL047C, MOBY-ORF, CEN-ARS, URA3)	Fig 7-Sup table 1
RLY9053	RLY9017; + DPB11 (YJL090C, MOBY-ORF, CEN-ARS, URA3)	Fig 7-Sup table 1
RLY9054	RLY9017; + SRS2 (YJL092W, MOBY-ORF, CEN-ARS, URA3)	Fig 7-Sup table 1
RLY9055	RLY9017; + ASF1 (YJL115W, MOBY-ORF, CEN-ARS, URA3)	Fig 7-Sup table 1
RLY9056	RLY9017; + SPT10 (YJL127C, MOBY-ORF, CEN-ARS, URA3)	Fig 7-Sup table 1
RLY9057	RLY9017; + RPA34 (YJL148W, MOBY-ORF, CEN-ARS, URA3)	Fig 7-Sup table 1
RLY9058	RLY9017; + SWI3 (YJL176C, MOBY-ORF, CEN-ARS, URA3)	Fig 7-Sup table 1
RLY9059	RLY9017; + RPL39 (YJL189W, MOBY-ORF, CEN-ARS, URA3)	Fig 7-Sup table 1
RLY9060	RLY9017; + RPS14B (YJL191W, MOBY-ORF, CEN-ARS, URA3)	Fig 7-Sup table 1
RLY9061	RLY9017; + NUP85 (YJR042W, MOBY-ORF, CEN-ARS, URA3)	Fig 7-Sup table 1
RLY9062	RLY9017; + MIR1 (YJR077C, MOBY-ORF, CEN-ARS, URA3)	Fig 7-Sup table 1
RLY9063	RLY9017; + VPS25 (YJR102C, MOBY-ORF, CEN-ARS, URA3)	Fig 7-Sup table 1
RLY9064	RLY9017; + HIR3 (YJR140C, MOBY-ORF, CEN-ARS, URA3)	Fig 7-Sup table 1
RLY9065	RLY9019; sir2∆::KanMX6/SIR2	Fig 5-S1A,B,D
* matying type unknown
KL, Kluyveromyces lactis
