# Supplementary material for: Aneuploidy as a cause of impaired chromatin silencing and mating-type specification in budding yeast
Source: eLife. 2017 Aug 25;6:e27991. doi: 10.7554/eLife.27991 (PMC5779231; doi:10.7554/eLife.27991)
Supplement: Supplementary file 5. [file elife-27991-supp5.xlsx]

## Sheet: Table 5_Plasmids
Table 5. List of plasmids used in this study.
Name	RLB No.	Description	Source
pWM1	RLB912	pRS306, RPL39, RPS14B	This study
pWM2	RLB913	pRS306, ASF1, DPB11	This study
pWM3	RLB884	KAN, URA3, CEN-ARS, (MOBY plasmid without ORF)	Li Lab
pWM4	RLB914	AMP, URA3, CEN-ARS, (pRS316-Pgal1-URA3)	Li Lab
