# Supplementary material for: Aneuploidy as a cause of impaired chromatin silencing and mating-type specification in budding yeast
Source: eLife. 2017 Aug 25;6:e27991. doi: 10.7554/eLife.27991 (PMC5779231; doi:10.7554/eLife.27991)
Supplement: Supplementary file 6. [file elife-27991-supp6.xlsx]

## Sheet: Table 6_Oligonucleotides
Table 6. List of oligos used in this study.
Name	Alias	Sequence (5'-3')
Oligonucleotides used for strain construction
sir1 KO fwd	WMP1	TTGGGCACATGTGACCCGGAATGTATATTGAGTAATATAAGAATGTCGGGGCTGGCTTAACTATG
sir1 KO rev	WMP2	GCTTATATGTTGGTATCCATAACTGATAATCTTACCAACTATTTATAATTTGTGAGTTTAGTATA
Chr X::Pgal1-URAKL-Chr X fwd	WMP3	ACAGATATGACACACTTGTAGCGCCAACGCGCATCCTACGGATTGCTGACTGCGGCATCAGAGCAGATTGTA
Chr X::Pgal1-URAKL-Chr X rev	WMP4	TTGTAAAACTGTGGCTTTGTTATACGGTGATTTCCTTTGGAGGTTGCTAAGCCAAGCTCGGAATTAACCCTC
Chr X::Pgal1-URAKL-CenX fwd	WMP5	TGCAGCACCAACACCTAAT
Chr X::Pgal1-URAKL-CenX fwd	WMP6	ATGAGCTACCAATCAGCGTAAA
SIR2::mTurq-KanMX6 fwd	WMP7	AGGATAAGGGCGTGTATGTCGTTACATCAGATGAACATCCCAAAACCCTCCGGATCCCCGGGTTAATTAA
SIR2::mTurq-KanMX6 rev	WMP8	TGTAAATTGATATTAATTTGGCACTTTTAAATTATTAAATTGCCTTCTACGAATTCGAGCTCGTTTAAAC
NUP60::mCherry-URA3fwd	WMP9	GCTTGGTTGATGAAAATAAAGTTGAGGCTTTCAAGTCCCTATATACCTTTGGTGACGGTGCTGGTTTA
NUP60::mCherry-URA3 rev	WMP10	GTATTGAGTTGGGCTATACGGTAATTATGTCACGGCTAAAATTTTCATTATCGATGAATTCGAGCTCG
Oligonucleotides used for quantitative RT-PCR
ACT1 fwd	WMP11	TGTCCTTGTACTCTTCCGGT
ACT1 rev	WMP12	CCGGCCAAATCGATTCTCAA
YFP fwd	WMP13	GTGAAGGTGATGCAACATAC
YFP rev	WMP14	CATAACCGAAAGTAGTGACAAG
YFR057W fwd	WMP15	TACAGGCAGTCCTTTCTATTTC
YFR057W rev	WMP16	TGAAAGGCTATTGTCAAAGGA
COS12 fwd	WMP17	GGCACTGGATTAATTCTGAAG
COS12 rev	WMP18	CCTTGAAAGCCCAGAGAA
AAD15 fwd	WMP19	GCCTCCGAACAAACAGAT
AAD15 rev	WMP20	CGCCTTAGAGCGAACATAG
PAU4 fwd	WMP21	CAGACCAAGTGACCAGAATG
PAU4 rev	WMP22	CCATCTTTGGATAGAGCCTTG
NTS1-2 fwd	WMP23	ACGCGGTATGCGGAGTTGTAAGAT
NTS1-2 rev	WMP24	ATTCCTTCCCGCTTTCCTGCACTA
HML-A fwd	WMP25	AAAGGACGAGACACCAGAAGA
HML-A rev	WMP26	TCCAAATAAGTCCGTGCCGA
HML-B fwd	WMP27	GTA AGT TTG CGG AGT CAA AG
HML-B rev	WMP28	TGG ATG ATG TTC TAC AAG AGG
HML-C fwd	WMP29	CAT TAC GAA GAT TCT CGA TTC C
HML-C rev	WMP30	GAT AGA TAA TGT CCT CGC CTA C
HML-D fwd	WMP31	GTGAAGGTGATGCAACATAC
HML-D rev	WMP32	CATAACCGAAAGTAGTGACAAG
HML-E fwd	WMP33	CGT AAG TTT GGT CTA ATG TTG T
HML-E rev	WMP34	CCA CTA AGA ACT ATC CTG CTA T
HML-F fwd	WMP35	TAG AAC GAT ATC TGG TGT GTT
HML-F rev	WMP36	ACT CGA GCA TAA AGC ATA AAC
HMR-A fwd	WMP37	TCCTCGCACTATCGCTGTTATAC
HMR-A rev	WMP38	ATGTGAAGGATTATTTGACCTTTC
HMR-B fwd	WMP39	TGTCCTCGCCTACCTTCTTGAACA
HMR-B rev	WMP40	AGAATAAGCGCAGGTACTCCTGGT
HMR-C fwd	WMP41	TGGATGATATTTGTAGTATGGCGGA
HMR-C rev	WMP42	TCCCTTTGGGCTCTTCTCTT
HMR-D fwd	WMP43	AGAGAAGAGCCCAAAGGGAA
HMR-D rev	WMP44	ACTGTTGCGGAAAGCTGAAACT
HMR-E fwd	WMP45	AGTTTCAGCTTTCCGCAACAGT
HMR-E rev	WMP46	AAGATAAACAACCTCCGCCACGAC
HMR-F fwd	WMP47	GAAGAGACTTATGATCAACATAATTTTGC
HMR-F rev	WMP48	CATATACGAAAATGTTGGTGACATGTAATC
KL, Kluyveromyces lactis
