# Supplementary figures and images for: Aneuploidy as a cause of impaired chromatin silencing and mating-type specification in budding yeast
Source: eLife journal article supplement (doi:10.7554/elife.27991), 2017-08-25

**Figure 5 – figure supplement 1**

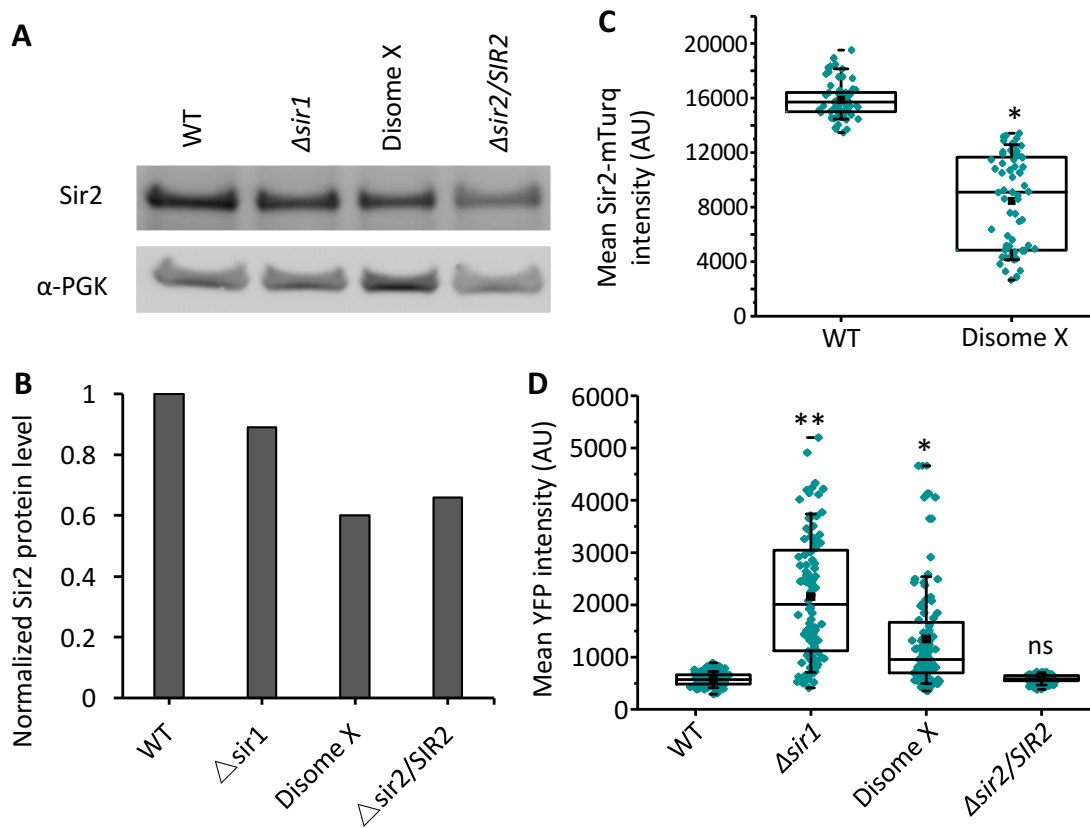

Supplement: supp [file elife-27991-supp-v1.zip]

Figure 1 - figure supplement 1

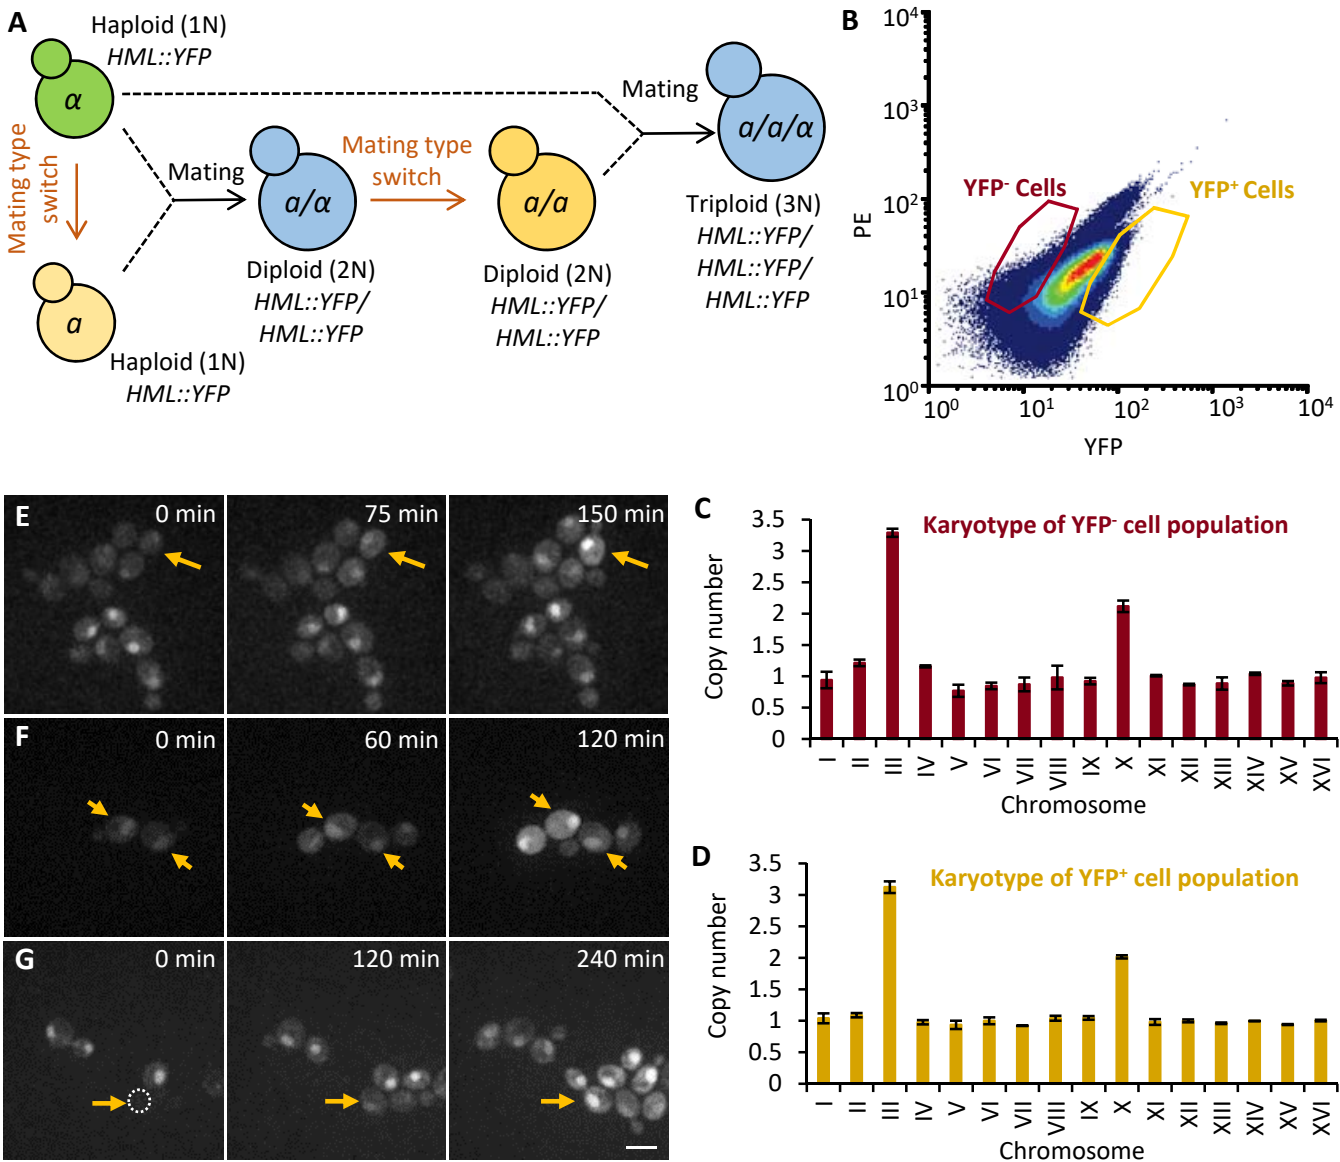

Supplement: supp [file elife-27991-supp-v1.zip]

Figure 6 – figure supplement 1

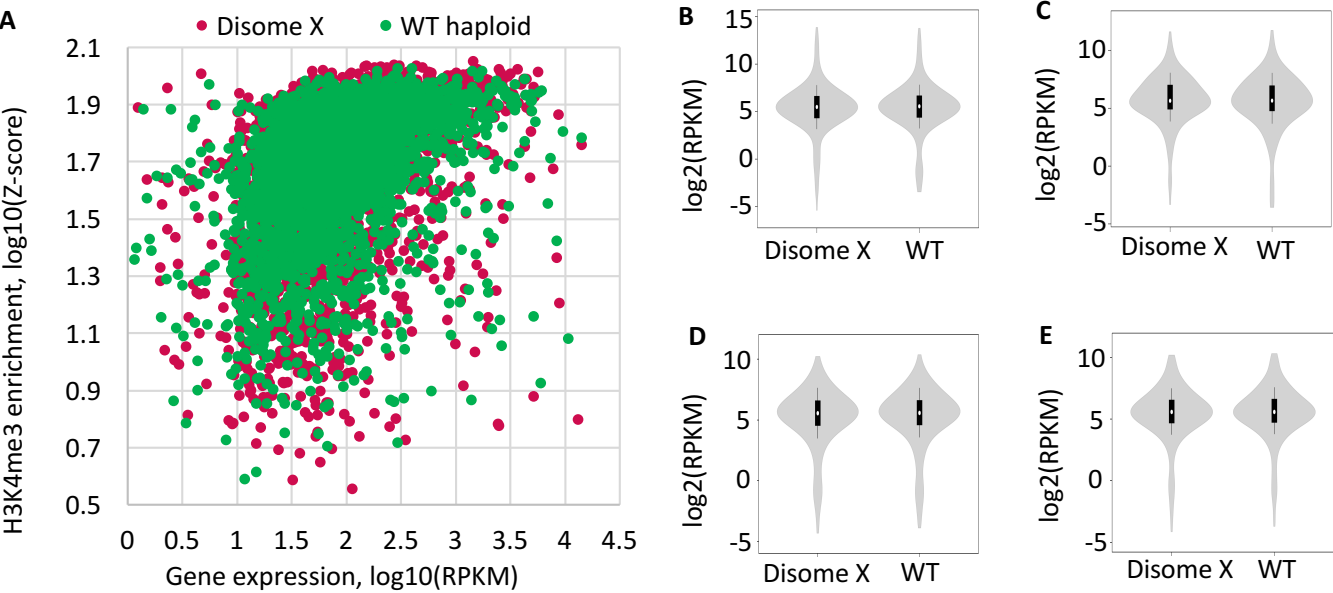

Supplement: supp [file elife-27991-supp-v1.zip]
